# Supplementary material for: The landscape of host genetic factors involved in immune response to common viral infections
Source: PubMed Central journal article supplement — medRxiv. 2020 Sep 5:2020.05.01.20088054. Preprint. [Version 3] doi: 10.1101/2020.05.01.20088054 (PMC7273301; doi:10.1101/2020.05.01.20088054), 2020-09-05

**Supplementary Table 1:** Characteristics of the UK Biobank serology sub-cohort consisting of predominantly European ancestry participants.

| Characteristic                               | Serology Data<br>(N=7948) |         | No Serology Data<br>(N=405,857) |        |
|----------------------------------------------|---------------------------|---------|---------------------------------|--------|
|                                              | N                         | (%)     | N                               | (%)    |
| Age at assessment                            |                           |         |                                 |        |
| Mean (SD)                                    | 56.74                     | (8.07)  | 56.74                           | (8.00) |
| Sex                                          |                           |         |                                 |        |
| Male                                         | 3519                      | (44.3)  | 187685                          | (46.2) |
| Smoking status                               |                           |         |                                 |        |
| Never smoker                                 | 4348                      | (55.0)  | 218228                          | (54.0) |
| Former smoker                                | 2774                      | (35.1)  | 143908                          | (35.6) |
| Current smoker                               | 789                       | (14.48) | 42285                           | (10.5) |
| Body-mass index (BMI) in kg/m <sup>2</sup>   |                           |         |                                 |        |
| Mean (SD)                                    | 27.36                     | (4.82)  | 27.41                           | (4.77) |
| Townsend deprivation index                   |                           |         |                                 |        |
| Mean (SD)                                    | -1.52                     | (2.96)  | -1.47                           | (2.99) |
| Autoimmune or chronic inflammatory condition | 1033                      | (13.0)  | 50467                           | (12.4) |
| Any type of immune deficiency                | 1223                      | (0.3)   | 24                              | (0.3)  |
| Cancer (prevalent or incident)               | 1069                      | (13.4)  | 52971                           | (13.1) |

Included in genetic association analyses (N=7985)

| <i>Human Herpes viruses</i>                    | Seropositive | (%)    |
|------------------------------------------------|--------------|--------|
| Cytomegalovirus (CMV)                          | 4437         | (56.2) |
| CMV pp28                                       | 4461         | (56.5) |
| CMV pp52                                       | 5000         | (63.3) |
| CMV pp150                                      | 4526         | (57.3) |
| Epstein-Barr virus (EBV)                       | 7470         | (94.6) |
| EBV EA-D                                       | 6806         | (86.2) |
| EBV EBNA                                       | 7003         | (88.7) |
| EBV VCA p18                                    | 7492         | (94.9) |
| EBV ZEBRA                                      | 7197         | (91.2) |
| Human Herpesvirus-6 (HHV6)                     | 7156         | (90.6) |
| HHV6 IE1A                                      | 6077         | (77.0) |
| HHV6 IE1B                                      | 6237         | (79.0) |
| HHV6 p101 k                                    | 6188         | (78.4) |
| Human Herpesvirus-7 (HHV7) U14                 | 7481         | (94.8) |
| Herpes Simplex virus-1 (HSV1) 1gG              | 5468         | (69.3) |
| Herpes Simplex virus-2 (HSV2) 2mgG             | 1214         | (15.4) |
| Kaposi's Sarcoma-Associated Herpesvirus (KSHV) | 607          | (7.7)  |
| KSHV K.81                                      | 219          | (2.8)  |
| KSHV LANA                                      | 432          | (5.5)  |
| VZV gE/Ig                                      | 7316         | (92.3) |

*Human Polyomaviruses*

|                                |      |        |
|--------------------------------|------|--------|
| BKV                            | 7523 | (95.3) |
| JCV                            | 4471 | (56.6) |
| Merkel Cell Polyomavirus (MCV) | 5219 | (66.1) |

*Human Papillomaviruses*

|                               |     |       |
|-------------------------------|-----|-------|
| HPV16 E6 or E7 (oncoproteins) | 371 | (4.7) |
| HPV16 L1                      | 341 | (4.3) |
| HPV18 L1                      | 190 | (2.4) |

*Hepatitis viruses*

|                   |     |       |
|-------------------|-----|-------|
| Hepatitis B (HBV) | 128 | (1.6) |
| HBV HBc           | 158 | (2.0) |
| HBV HBe           | 423 | (5.4) |
| Hepatitis C (HCV) | 23  | (0.3) |
| HCV Core          | 164 | (2.1) |
| HCV NS3           | 104 | (1.3) |

*Human T-lymphotropic viruses*

|                                      |     |       |
|--------------------------------------|-----|-------|
| Human T-lymphotropic Virus-1 (HTLV1) | 128 | (1.6) |
| HTLV1 env                            | 70  | (0.9) |
| HTLV1 gag                            | 59  | (0.3) |



**Supplementary Table 2:** Baseline characteristics of UK Biobank participants with available results for SARS-CoV-2 testing up to April 14, 2020

| Participant-level characteristics                | Tested for SARS-CoV-2 |          |               |          |             |          | Not Tested     |          |
|--------------------------------------------------|-----------------------|----------|---------------|----------|-------------|----------|----------------|----------|
|                                                  | Negative: 805         |          | Positive: 669 |          | Total: 1474 |          | Total: 501,062 |          |
|                                                  | N                     | (%)      | N             | (%)      | N           | (%)      | N              | (%)      |
| <b>Age at assessment</b>                         |                       |          |               |          |             |          |                |          |
| Mean (SD)                                        | 57.89                 | (8.68)   | 57.47         | (8.67)   | 57.70       | (8.68)   | 56.53          | (8.09)   |
| <b>Sex</b>                                       |                       |          |               |          |             |          |                |          |
| Male                                             | 409                   | (50.8)   | 378           | (56.5)   | 787         | (53.4)   | 228347         | (45.6)   |
| <b>Self-reported ethnicity</b>                   |                       |          |               |          |             |          |                |          |
| White                                            | 741                   | (92.0)   | 565           | (84.5)   | 1306        | (88.6)   | 471419         | (94.1)   |
| Mixed (White, Black, Asian or other)             | 4                     | (0.5)    | 4             | (0.6)    | 8           | (0.5)    | 2950           | (0.6)    |
| Asian (Indian, Pakistani, Bangladeshi)           | 20                    | (2.5)    | 29            | (4.3)    | 49          | (3.3)    | 9833           | (2.0)    |
| Black (Caribbean, African, British, other)       | 22                    | (2.7)    | 46            | (6.9)    | 68          | (4.6)    | 7993           | (1.6)    |
| Chinese                                          | 0                     | (0)      | 4             | (0.6)    | 4           | (0.3)    | 1570           | (0.3)    |
| Other ethnic group                               | 14                    | (1.7)    | 15            | (2.2)    | 6           | (0.4)    | 4530           | (0.9)    |
| <b>Body-mass index (BMI) in kg/m<sup>2</sup></b> |                       |          |               |          |             |          |                |          |
| Mean (SD)                                        | 28.33                 | (5.72)   | 29.15         | (5.49)   | 28.70       | (5.63)   | 27.43          | (4.80)   |
| <b>Townsend deprivation index</b>                |                       |          |               |          |             |          |                |          |
| Mean (SD)                                        | -0.33                 | (3.50)   | 0.05          | (3.56)   | -0.16       | (3.53)   | -1.30          | (3.09)   |
| <b>Smoking status</b>                            |                       |          |               |          |             |          |                |          |
| Never smoker                                     | 354                   | (44.1)   | 303           | (45.9)   | 657         | (44.9)   | 272880         | (54.8)   |
| Former smoker                                    | 307                   | (38.3)   | 285           | (43.2)   | 592         | (40.5)   | 172478         | (34.6)   |
| Current smoker                                   | 141                   | (17.6)   | 72            | (10.9)   | 213         | (14.6)   | 52766          | (10.6)   |
| <b>Cigarette pack-years in smokers</b>           |                       |          |               |          |             |          |                |          |
| Mean (SD)                                        | 24.99                 | (15.52)  | 26.82         | (18.32)  | 25.80       | (16.84)  | 21.47          | (13.77)  |
| <b>Alcohol intake frequency</b>                  |                       |          |               |          |             |          |                |          |
| Never / non-drinker                              | 85                    | (10.6)   | 84            | (12.6)   | 169         | (11.5)   | 40479          | (8.1)    |
| Special occasions only                           | 114                   | (14.2)   | 97            | (14.6)   | 211         | (14.4)   | 57801          | (11.6)   |
| 1-3 times a month                                | 86                    | (10.7)   | 86            | (12.9)   | 172         | (11.7)   | 55686          | (11.1)   |
| 1-2 times per week                               | 191                   | (23.8)   | 157           | (23.6)   | 348         | (23.7)   | 128949         | (25.8)   |
| 3-4 times per week                               | 159                   | (19.8)   | 128           | (19.2)   | 287         | (19.6)   | 115158         | (23.1)   |
| Daily or almost daily                            | 168                   | (20.9)   | 113           | (17.0)   | 281         | (19.1)   | 101493         | (20.3)   |
| <b>Weekly alcohol intake (gr)</b>                |                       |          |               |          |             |          |                |          |
| Mean (SD)                                        | 153.25                | (187.34) | 142.32        | (191.00) | 148.30      | (189.02) | 146.58         | (170.30) |
| <b>UK Biobank assessment center</b>              |                       |          |               |          |             |          |                |          |
| Stockport (pilot)                                | 9                     | (1.1)    | 12            | (1.8)    | 21          | (1.4)    | 3776           | (0.8)    |
| Manchester                                       | 30                    | (3.7)    | 25            | (3.7)    | 55          | (3.7)    | 13884          | (2.8)    |
| Oxford                                           | 28                    | (3.5)    | 15            | (2.2)    | 43          | (2.9)    | 14015          | (2.8)    |
| Cardiff                                          | 0                     | (0.0)    | 0             | (0.0)    | 0           | (0.0)    | 17878          | (3.6)    |
| Glasgow                                          | 0                     | (0.0)    | 0             | (0.0)    | 0           | (0.0)    | 18647          | (3.7)    |
| Edinburgh                                        | 0                     | (0.0)    | 0             | (0.0)    | 0           | (0.0)    | 17198          | (3.4)    |

|                                                            |                |        |                |        |      |        |        |        |
|------------------------------------------------------------|----------------|--------|----------------|--------|------|--------|--------|--------|
| Stoke                                                      | 31             | (3.9)  | 16             | (2.4)  | 47   | (3.2)  | 19386  | (3.9)  |
| Reading                                                    | 37             | (4.6)  | 27             | (4.0)  | 64   | (4.3)  | 29347  | (5.9)  |
| Bury                                                       | 37             | (4.6)  | 36             | (5.4)  | 73   | (5.0)  | 28248  | (5.6)  |
| Newcastle                                                  | 95             | (11.8) | 72             | (10.8) | 167  | (11.3) | 36835  | (7.4)  |
| Leeds                                                      | 12             | (1.5)  | 46             | (6.9)  | 58   | (3.9)  | 44140  | (8.8)  |
| Bristol                                                    | 68             | (8.4)  | 35             | (5.2)  | 103  | (7.0)  | 42909  | (8.6)  |
| Barts                                                      | 30             | (3.7)  | 32             | (4.8)  | 62   | (4.2)  | 12520  | (2.5)  |
| Nottingham                                                 | 68             | (8.4)  | 39             | (5.8)  | 107  | (7.3)  | 33769  | (6.7)  |
| Sheffield                                                  | 92             | (11.4) | 51             | (7.6)  | 143  | (9.7)  | 30253  | (6.0)  |
| Liverpool                                                  | 76             | (9.4)  | 63             | (9.4)  | 139  | (9.4)  | 32677  | (6.5)  |
| Middlesbrough                                              | 58             | (7.2)  | 24             | (3.6)  | 82   | (5.6)  | 21204  | (4.2)  |
| Hounslow                                                   | 44             | (5.5)  | 56             | (8.4)  | 100  | (6.8)  | 28775  | (5.7)  |
| Croydon                                                    | 47             | (5.8)  | 66             | (9.9)  | 113  | (7.7)  | 27267  | (5.4)  |
| Birmingham                                                 | 43             | (5.3)  | 54             | (8.1)  | 97   | (6.6)  | 25404  | (5.1)  |
| Swansea                                                    | 0              | (0.0)  | 0              | (0.0)  | 0    | (0.0)  | 2281   | (0.5)  |
| Wrexham                                                    | 0              | (0.0)  | 0              | (0.0)  | 0    | (0.0)  | 649    | (0.1)  |
| Forced expiratory volume in 1-sec (FEV <sub>1</sub> ) in L | 2.70           | (0.76) | 2.72           | (0.80) | 2.71 | (0.78) | 2.84   | (0.79) |
| Forced vital capacity (FVC) in L                           | 3.61           | (0.96) | 3.61           | (1.01) | 3.61 | (0.98) | 3.74   | (1.01) |
| FEV <sub>1</sub> /FVC                                      | 0.75           | (0.08) | 0.76           | (0.08) | 0.75 | (0.08) | 0.76   | (0.07) |
| Charlson comorbidity index                                 |                |        |                |        |      |        |        |        |
| 0                                                          | 397            | (49.3) | 340            | (50.8) | 737  | (50.0) | 351798 | (70.2) |
| 1-2                                                        | 289            | (35.9) | 245            | (36.6) | 534  | (36.2) | 126196 | (25.2) |
| 3-4                                                        | 85             | (10.6) | 69             | (10.3) | 154  | (10.4) | 19100  | (3.8)  |
| 5 or more                                                  | 34             | (4.2)  | 15             | (2.2)  | 49   | (3.3)  | 3968   | (0.8)  |
| Genetic association analyses                               |                |        |                |        |      |        |        |        |
| European ancestry, pass quality control                    | 633            | (78.6) | 480            | (71.7) | 1113 | (75.5) | 412692 | (82.4) |
| Results from respiratory specimens                         | 585            | (72.7) | 443            | (64.7) | 1028 | (69.7) | -      | -      |
| Number of SARS-CoV-2 tests                                 |                |        |                |        |      |        |        |        |
| Tested once                                                | 421            | (52.3) | 239            | (35.7) |      |        |        |        |
| Tested multiple times                                      | 384            | (47.7) | 430            | (64.3) |      |        |        |        |
| Test-level characteristics: 2724 tests                     |                |        |                |        |      |        |        |        |
|                                                            | Negative: 1564 |        | Positive: 1160 |        |      |        |        |        |
|                                                            | N              | (%)    | N              | (%)    |      |        |        |        |
| Specimen type                                              |                |        |                |        |      |        |        |        |
| Respiratory                                                | 1388           | (88.7) | 1018           | (87.8) |      |        |        |        |
| Serum                                                      | 48             | (3.1)  | 39             | (3.4)  |      |        |        |        |
| Unknown or other                                           | 128            | (8.2)  | 103            | (8.9)  |      |        |        |        |
| Test origin                                                |                |        |                |        |      |        |        |        |
| Confirmed acute care / inpatient setting                   | 750            | (48.0) | 451            | (52.0) |      |        |        |        |
| Unknown                                                    | 814            | (38.9) | 709            | (61.1) |      |        |        |        |

**Supplementary Table 3:** Odds ratios (OR) for lead variants associated with seropositivity for each antigen and SARS-Cov-2 test positive status. Linkage disequilibrium (LD)  $r^2$  was calculated with respect to the lead variant for the continuous seroreactivity phenotype for the same antigen, if applicable.

| Antigen            | Chr   | Position | Variant   | Alleles      |        | EAF | OR    | P     | Function              | Nearest Gene         | INFO                   | LD $r^2$ with Seroreactivity Variant |                   |
|--------------------|-------|----------|-----------|--------------|--------|-----|-------|-------|-----------------------|----------------------|------------------------|--------------------------------------|-------------------|
|                    |       |          |           | Effect       | Other  |     |       |       |                       |                      |                        |                                      |                   |
| CMV                | pp150 | 10       | 71789604  | rs1181430303 | CAAT   | C   | 0.988 | 0.362 | $1.3 \times 10^{-8}$  | intergenic           | <i>RP11-262I2.2</i>    | 0.974                                | -                 |
| EBV                | EA-D  | 6        | 32447644  | rs2395192    | C      | T   | 0.447 | 0.656 | $4.0 \times 10^{-19}$ | intergenic           | <i>HLA-DRB9</i>        | 0.983                                | rs34825357: 0.670 |
| EBV                | EBNA  | 6        | 32429303  | rs9268848    | G      | A   | 0.449 | 1.598 | $1.2 \times 10^{-18}$ | intronic             | <i>HLA-DRB9</i>        | 0.992                                | rs9269233: 0.296  |
| EBV                | ZEBRA | 6        | 32578323  | rs17211342   | A      | G   | 0.542 | 0.623 | $1.6 \times 10^{-15}$ | intergenic           | <i>HLA-DRB1</i>        | 0.999                                | rs9274728: 0.388  |
| HHV6               | IE1B  | 4        | 111337175 | rs72666167   | G      | A   | 0.952 | 1.588 | $3.2 \times 10^{-8}$  | intronic             | <i>ENPEP / ZNF969P</i> | 0.950                                | -                 |
| HHV6               | p101k | 6        | 31352446  | rs7775759    | G      | A   | 0.730 | 0.785 | $2.1 \times 10^{-8}$  | intergenic           | <i>HLA-S</i>           | 1.000                                | -                 |
| HSV2               | 2mgG  | 17       | 3707723   | rs2116443    | C      | T   | 0.485 | 1.279 | $4.5 \times 10^{-8}$  | upstream             | <i>ITGAE</i>           | 0.993                                | -                 |
| KSHV               | K8.1  | 1        | 94134854  | rs75175947   | G      | C   | 0.988 | 0.221 | $2.2 \times 10^{-8}$  | intronic             | <i>BCAR3</i>           | 0.924                                | -                 |
|                    |       | 7        | 67785001  | rs553306098  | ATATAT | A   |       | 0.983 | 0.242                 | $4.1 \times 10^{-8}$ | upstream               | <i>LOC105375341</i>                  | 0.790             |
| KSHV               | LANA  | 22       | 19399297  | rs138358091  | A      | C   | 0.983 | 0.344 | $1.2 \times 10^{-8}$  | intronic             | <i>HIRA</i>            | 0.938                                | -                 |
| VZV                | gE/Ig | 6        | 32161034  | rs3096688    | C      | T   | 0.301 | 0.701 | $3.7 \times 10^{-8}$  | intronic             | <i>GP5M3</i>           | 0.995                                | rs9273325: 0.076  |
| HPV16              | E6/E7 | 6        | 32573265  | rs601148     | G      | T   | 0.805 | 0.603 | $3.3 \times 10^{-9}$  | intergenic           | <i>HLA-DRB1</i>        | 0.973                                | -                 |
|                    |       | 19       | 30611215  | rs144341759  | G      | A   | 0.975 | 0.383 | $4.0 \times 10^{-8}$  | intergenic           | <i>CTC-448F2.6</i>     | 0.920                                | -                 |
| HPV16              | L1    | 9        | 1061974   | rs200104414  | A      | ATG | 0.981 | 0.295 | $4.9 \times 10^{-8}$  | intergenic           | <i>RPS27AP14</i>       | 0.822                                | -                 |
|                    |       | 5        | 139338366 | rs142237244  | G      | A   | 0.987 | 0.201 | $3.4 \times 10^{-8}$  | intronic             | <i>NRG2</i>            | 0.890                                | -                 |
| HPV18              | L1    | 14       | 77060652  | rs4243652    | G      | A   | 0.035 | 3.132 | $7.0 \times 10^{-10}$ | intronic             | <i>LOC105370576</i>    | 0.987                                | -                 |
|                    |       | X        | 12493856  | rs187318482  | C      | G   | 0.989 | 0.271 | $3.6 \times 10^{-8}$  | intronic             | <i>FRMPD4</i>          | 0.750                                | -                 |
| HBV                | HBc   | 19       | 22899930  | rs111736095  | C      | T   | 0.984 | 0.217 | $8.3 \times 10^{-9}$  | upstream             | <i>CTC-457E21.9</i>    | 0.898                                | -                 |
| HCV                | Core  | 2        | 112655155 | rs199913364  | CAG    | C   | 0.980 | 0.248 | $1.2 \times 10^{-8}$  | upstream             | <i>MERTK</i>           | 0.942                                | -                 |
|                    |       | 11       | 75259052  | rs79794175   | C      | T   | 0.933 | 0.406 | $1.2 \times 10^{-8}$  | intergenic           | <i>SERPINH1</i>        | 1                                    | -                 |
| HCV                | NS3   | 6        | 115406379 | rs549795309  | C      | T   | 0.979 | 0.204 | $2.5 \times 10^{-8}$  | intergenic           | <i>RP11-282C5.1</i>    | 0.886                                | -                 |
|                    |       | 10       | 82580895  | rs144432266  | A      | C   | 0.989 | 0.158 | $1.7 \times 10^{-8}$  | intergenic           | <i>FARSBP1</i>         | 0.874                                | -                 |
| JCV                | VP1   | 6        | 32577385  | rs9271147    | T      | C   | 0.152 | 0.536 | $1.3 \times 10^{-42}$ | intergenic           | <i>HLA-DQA1</i>        | 0.998                                | rs9271525: 0.160  |
| MCV                | VP1   | 6        | 32621980  | rs17613347   | T      | C   | 0.150 | 0.613 | $1.2 \times 10^{-26}$ | intergenic           | <i>HLA-DQB1</i>        | 0.995                                | rs9268847: 0.052  |
|                    |       | 5        | 138845045 | rs1193730215 | TTATC  | T   |       | 0.259 | 1.259                 | $7.2 \times 10^{-9}$ | intergenic             | <i>ECSCR</i>                         | 0.985             |
| HTLV1 <sup>1</sup> |       | 9        | 15483425  | rs16933318   | G      | C   | 0.990 | 0.153 | $3.3 \times 10^{-8}$  | intronic             | <i>PSIP1</i>           | 0.948                                | -                 |

<sup>1</sup> Case counts for HTLV1 env and HTLV1 gag antigens were <100, therefore results are presented for HTLV1 based on seropositivity for at least one antigen

**Supplementary Table 4:** Functional annotations for the top-ranking genetic variants associated with antibody response for antigens with at least 20% seroprevalence. Expression (eQTL) and splicing quantitative trait loci (sQTL) associations with FDR<0.05 were obtained in GTEx v8 and DICE (Database of Immune Cell Expression). Plasma protein (pQTL) associations with  $P<5.0\times 10^{-8}$  were obtained from the Human Plasma Proteome atlas.

| Phenotype              | Chr | Position  | Variant     | Alleles |       | CADD <sup>1</sup> | RegulomeDB         |                   | eQTL (GTEx) |         | eQTL (DICE) |       | sQTL (GTEx) | pQTL     |
|------------------------|-----|-----------|-------------|---------|-------|-------------------|--------------------|-------------------|-------------|---------|-------------|-------|-------------|----------|
|                        |     |           |             | Effect  | Other |                   | Score <sup>2</sup> | Rank <sup>3</sup> | Genes       | Tissues | Genes       | Cells | Genes       | Proteins |
| CMV pp52               | 6   | 32301427  | rs115378818 | C       | T     | 4.55              | 0.29               | 5                 | -           | -       | -           | -     | -           | -        |
| EBV EA-D               | 6   | 32665840  | rs34825357  | T       | TC    | 10.63             | 0.63               | 5                 | 25          | 49      | -           | -     | -           | 12       |
| EBV EBNA               | 3   | 151114852 | rs67886110  | G       | T     | 1.55              | 0.20               | 6                 | 2           | 29      | 1           | 1     | -           | -        |
|                        | 6   | 32451762  | rs9269233   | A       | C     | 0.60              | 0.13               | 5                 | 27          | 48      | 4           | 10    | 13          | 4        |
| EBV p18                | 6   | 31486158  | 6:31486158  | GT      | G     | 0.02              | -                  | -                 | -           | -       | 1           | 5     | -           | -        |
| EBV ZEBRA              | 6   | 32637772  | rs9274728   | A       | G     | 7.92              | 0.95               | 5                 | 22          | 49      | 8           | 15    | 9           | 5        |
| HHV6 IE1A              | 7   | 139985625 | rs2429218   | T       | C     | 0.64              | 0.61               | 4                 | 1           | 1       | -           | -     | -           | -        |
|                        | 6   | 32602665  | rs139299944 | C       | CT    | 12.15             | 0.72               | 5                 | 15          | 48      | -           | -     | 9           | -        |
| HHV7 U14               | 11  | 118767564 | rs75438046  | G       | A     | 7.00              | 0.61               | 4                 | 2           | 6       | -           | -     | -           | -        |
|                        | 17  | 45794706  | rs1808192   | A       | G     | 4.18              | 0.55               | 1f                | 6           | 35      | 2           | 11    | 5           | -        |
| HSV1 1gG               | 6   | 32627852  | rs1130420   | G       | A     | 9.73              | 0.74               | 2b                | -           | -       | 8           | 15    | -           | 2        |
|                        | 10  | 91189187  | rs11203123  | A       | C     | 1.41              | 0.53               | 5                 | -           | -       | -           | -     | -           | -        |
| VZV gE/Ig <sup>1</sup> | 6   | 32623193  | rs9273325   | G       | A     | 4.91              | 0.13               | 5                 | -           | -       | 1           | 1     | -           | 15       |
| BKV VP1                | 19  | 49206462  | rs681343    | C       | T     | 0.06              | 0.13               | 5                 | 8           | 40      | 1           | 7     | 3           | 16       |
| JCV VP1                | 6   | 32589842  | rs9271525   | G       | A     | 10.73             | 0.15               | 3a                | 35          | 49      | 8           | 15    | 14          | 4        |
|                        | 3   | 18238783  | rs776170649 | CT      | C     | 15.61             | 0.35               | 6                 | -           | -       | -           | -     | -           | -        |
| MCV VP1                | 5   | 138865423 | rs7444313   | G       | A     | 1.89              | 0.36               | 6                 | 7           | 31      | -           | -     | 3           | -        |
|                        | 6   | 32429277  | rs9268847   | A       | G     | 5.57              | 0.18               | 7                 | 16          | 28      | -           | -     | 8           | -        |
| SARS-CoV-2             | 18  | 13466908  | rs7231584   | G       | A     | 3.54              | 0.88               | 2b                | 1           | 14      | -           | -     | -           | -        |

<sup>1</sup> Combined Annotation Dependent Depletion (CADD) score: >10 corresponds to the top 10% most deleterious substitutions in the genome

<sup>2</sup> Score: ranges from 0 to 1, with 1 being most likely to be a regulatory variant. This score is based on a model that integrates functional genomics features with continuous values such as ChIP-seq signal, DNase-seq signal, information content change, and DeepSEA scores

<sup>3</sup> Rank: 1f = eQTL + TF binding / DNase peak; 2b = TF binding + any motif + DNase Footprint + DNase peak; 3a = TF binding + any motif + DNase peak; 4= TF binding + DNase peak; 5= TF binding or DNase peak; 6 or greater = minimal evidence

**Supplementary Table 5:** Significant effects ( $P < 5.0 \times 10^{-8}$ ) on plasma protein levels (pQTL) observed for lead genome-wide significant variants for viral antigen antibody response using data from the Human Plasma Proteome atlas.

| Phenotype                                       | Variant              | Target Protein                                            | $P_{\text{pQTL}}$     | Source Dataset [PMID] |
|-------------------------------------------------|----------------------|-----------------------------------------------------------|-----------------------|-----------------------|
| EBV<br>EA-D                                     | rs34825357           | Glutamate receptor 4                                      | $1.5 \times 10^{-28}$ | Sun et al. [29875488] |
|                                                 |                      | T-cell surface protein tactile                            | $6.5 \times 10^{-21}$ |                       |
|                                                 |                      | Complement C4                                             | $1.2 \times 10^{-20}$ |                       |
|                                                 |                      | cAMP-specific 3,5-cyclic phosphodiesterase 4D             | $2.8 \times 10^{-20}$ |                       |
|                                                 |                      | HLA class II histocompatibility antigen, DQ alpha 2 chain | $1.1 \times 10^{-19}$ |                       |
|                                                 |                      | Vesicle-fusing ATPase                                     | $5.9 \times 10^{-12}$ |                       |
|                                                 |                      | Beta-defensin 119                                         | $1.0 \times 10^{-10}$ |                       |
|                                                 |                      | Killer cell immunoglobulin-like receptor 2DS2             | $4.0 \times 10^{-10}$ |                       |
|                                                 |                      | Interleukin-21                                            | $4.6 \times 10^{-10}$ |                       |
|                                                 |                      | GDH/6PGL endoplasmic bifunctional protein                 | $5.9 \times 10^{-10}$ |                       |
|                                                 |                      | MHC class I polypeptide-related sequence B                | $8.3 \times 10^{-10}$ |                       |
| Trypsin-3                                       | $2.9 \times 10^{-8}$ |                                                           |                       |                       |
| EBV<br>EBNA                                     | rs9269233            | HLA class II histocompatibility antigen, DQ alpha 2 chain | $2.0 \times 10^{-21}$ | Sun et al. [29875488] |
|                                                 |                      | GDH/6PGL endoplasmic bifunctional protein                 | $3.2 \times 10^{-13}$ |                       |
|                                                 |                      | Killer cell immunoglobulin-like receptor 2DS2             | $1.3 \times 10^{-10}$ |                       |
|                                                 |                      | Ameloblastin                                              | $3.7 \times 10^{-8}$  |                       |
| EBV<br>ZEBRA                                    | rs9274728            | Complement C4                                             | $6.9 \times 10^{-16}$ | Sun et al. [29875488] |
|                                                 |                      | MHC class I polypeptide-related sequence B                | $6.6 \times 10^{-11}$ |                       |
|                                                 |                      | Interleukin-21                                            | $2.2 \times 10^{-10}$ |                       |
|                                                 |                      | Ubiquitin carboxyl-terminal hydrolase 25                  | $8.9 \times 10^{-10}$ |                       |
|                                                 |                      | T-cell surface protein tactile                            | $3.8 \times 10^{-8}$  |                       |
| HSV1                                            | rs1130420            | Trypsin-3                                                 | $7.2 \times 10^{-15}$ | Sun et al. [29875488] |
|                                                 |                      | Rac GTPase-activating protein 1                           | $1.7 \times 10^{-13}$ |                       |
| VZV                                             | rs9273325            | HLA class II histocompatibility antigen, DQ alpha 2 chain | $4.9 \times 10^{-38}$ | Sun et al. [29875488] |
|                                                 |                      | Glutamate receptor 4                                      | $6.8 \times 10^{-26}$ |                       |
|                                                 |                      | cAMP-specific 3,5-cyclic phosphodiesterase 4D             | $1.7 \times 10^{-24}$ |                       |
|                                                 |                      | MHC class I polypeptide-related sequence B                | $8.3 \times 10^{-22}$ |                       |
|                                                 |                      | Complement C4                                             | $2.0 \times 10^{-18}$ |                       |
|                                                 |                      | T-cell surface protein tactile                            | $7.6 \times 10^{-16}$ |                       |
|                                                 |                      | Trypsin-3                                                 | $2.0 \times 10^{-13}$ |                       |
|                                                 |                      | Rac GTPase-activating protein 1                           | $4.5 \times 10^{-11}$ |                       |
|                                                 |                      | Beta-defensin 119                                         | $3.6 \times 10^{-10}$ |                       |
|                                                 |                      | Interleukin-21                                            | $1.9 \times 10^{-9}$  |                       |
|                                                 |                      | Tenascin-X                                                | $2.0 \times 10^{-9}$  |                       |
|                                                 |                      | Ubiquitin-like protein ISG15                              | $3.9 \times 10^{-9}$  |                       |
|                                                 |                      | Palmitoyl-protein thioesterase 1                          | $4.5 \times 10^{-9}$  |                       |
| Polypeptide N-acetylgalactosaminyltransferase 1 | $4.6 \times 10^{-9}$ |                                                           |                       |                       |
| Coiled-coil domain-containing protein 134       | $4.6 \times 10^{-8}$ |                                                           |                       |                       |

|               |                      |                                                                         |                        |                             |
|---------------|----------------------|-------------------------------------------------------------------------|------------------------|-----------------------------|
| BKV           | rs681343             | Protein FAM3D                                                           | $1.8 \times 10^{-110}$ | Sun et al. [29875488]       |
|               |                      | Golgi membrane protein 1                                                | $1.5 \times 10^{-28}$  |                             |
|               |                      | C-C motif chemokine 15                                                  | $2.2 \times 10^{-27}$  |                             |
|               |                      | Transcobalamin-1                                                        | $1.8 \times 10^{-21}$  | Yao et al. [30111768]       |
|               |                      | Secreted and transmembrane protein 1                                    | $7.2 \times 10^{-20}$  |                             |
|               |                      | Lithostathine-1-alpha                                                   | $2.3 \times 10^{-18}$  |                             |
|               |                      | Protein FAM177A1                                                        | $5.5 \times 10^{-18}$  | Sun et al. [29875488]       |
|               |                      | Galactoside 3(4)-L-fucosyltransferase                                   | $4.0 \times 10^{-16}$  |                             |
|               |                      | Intestinal-type alkaline phosphatase                                    | $1.3 \times 10^{-15}$  |                             |
|               |                      | C-C motif chemokine 25                                                  | $1.4 \times 10^{-13}$  | Sun et al. [29875488]       |
|               |                      | Fibroblast growth factor 19 (FGF19)                                     | $2.6 \times 10^{-13}$  |                             |
|               |                      | BPI fold-containing family B member 1 (BPIFB1)                          | $5.4 \times 10^{-10}$  |                             |
|               |                      | N-acetyllactosaminide beta-1,3-N-acetylglucosaminyltransferase 2 (FUT3) | $6.8 \times 10^{-9}$   | Sun et al. [29875488]       |
|               |                      | Lactase-phlorizin hydrolase                                             | $1.2 \times 10^{-8}$   | Folkersen et al. [28369058] |
|               |                      | Tissue factor                                                           | $8.7 \times 10^{-9}$   |                             |
| Stromelysin-2 | $3.5 \times 10^{-8}$ |                                                                         |                        |                             |
| JCV           | rs9271525            | GDH/6PGL endoplasmic bifunctional protein                               | $4.2 \times 10^{-26}$  | Sun et al. [29875488]       |
|               |                      | Killer cell immunoglobulin-like receptor 2DS2                           | $2.2 \times 10^{-11}$  |                             |
|               |                      | Osteocalcin                                                             | $6.5 \times 10^{-9}$   |                             |
|               |                      | Complement factor B                                                     | $3.1 \times 10^{-8}$   |                             |

**Supplementary Table 6:** Odds ratios (OR) for the effect of lead seroreactivity variants on selected cancers, schizophrenia, and Alzheimer's disease (AD). Associations with  $P < 7.3 \times 10^{-4}$  were considered statistically significant after Bonferroni correction for the number of genetic variants and phenotypes tested.

| Antigen | Chr                | Position | Variant   | Alleles                  |       | Effect on antibody response (MFI) |        | Hematologic cancers <sup>1</sup><br>3262 cases / 410,350 controls |       | Melanoma<br>6777 cases / 410,350 controls |       | Schizophrenia <sup>2</sup><br>33,640 cases / 43,456 controls |       | AD <sup>3</sup><br>17,536 cases / 53,711 controls |                      |
|---------|--------------------|----------|-----------|--------------------------|-------|-----------------------------------|--------|-------------------------------------------------------------------|-------|-------------------------------------------|-------|--------------------------------------------------------------|-------|---------------------------------------------------|----------------------|
|         |                    |          |           | Effect                   | Other | Beta                              | (SE)   | OR                                                                | P     | OR                                        | P     | OR                                                           | P     | P                                                 |                      |
| CMV     | pp52               | 6        | 32301427  | rs115378818              | C     | T                                 | 0.633  | (0.095)                                                           | 0.809 | 0.058                                     | 0.886 | 0.12                                                         | 0.989 | 0.84                                              | 0.44                 |
| EBV     | EA-D               | 6        | 32665840  | rs34825357 <sup>†</sup>  | T     | TC                                | -0.114 | (0.017)                                                           | 0.978 | 0.45                                      | 1.054 | 0.017                                                        | 0.960 | $2.7 \times 10^{-4}$                              | 0.75                 |
| EBV     | EBNA               | 3        | 151114852 | rs67886110*              | G     | T                                 | 0.103  | (0.017)                                                           | 0.960 | 0.11                                      | 0.993 | 0.68                                                         | 1.023 | 0.037                                             | 0.068                |
|         |                    | 6        | 32451762  | rs9269233 <sup>†</sup>   | A     | C                                 | 0.315  | (0.019)                                                           | 0.878 | $2.7 \times 10^{-4}$                      | 1.078 | $2.8 \times 10^{-3}$                                         | 1.034 | $6.2 \times 10^{-3}$                              | 0.28                 |
| EBV     | VCA p18            | 6        | 31486158  | 6:31486158 <sup>†</sup>  | GT    | G                                 | 0.197  | (0.018)                                                           | 0.921 | $6.1 \times 10^{-3}$                      | 0.993 | 0.75                                                         | 1.030 | 0.020                                             | 0.016                |
| EBV     | ZEBRA              | 6        | 32637772  | rs9274728                | A     | G                                 | -0.315 | (0.018)                                                           | 0.975 | 0.35                                      | 1.060 | $3.3 \times 10^{-3}$                                         | 0.993 | 0.59                                              | $1.7 \times 10^{-3}$ |
| HHV6    | IE1A               | 7        | 139985625 | rs2429218                | T     | C                                 | 0.106  | (0.019)                                                           | 1.035 | 0.19                                      | 0.990 | 0.58                                                         | 1.024 | 0.041                                             | 0.24                 |
| HHV7    | U14                | 6        | 32602665  | rs139299944              | C     | CT                                | 0.114  | (0.017)                                                           | 1.079 | $4.1 \times 10^{-3}$                      | 0.986 | 0.43                                                         | 0.990 | 0.38                                              | -                    |
|         |                    | 11       | 118767564 | rs75438046               | G     | A                                 | 0.280  | (0.049)                                                           | 0.913 | 0.22                                      | 0.919 | 0.11                                                         | 0.955 | 0.18                                              | $4.1 \times 10^{-3}$ |
| HSV1    | 1gG                | 17       | 45794706  | rs1808192 <sup>†</sup>   | A     | G                                 | -0.099 | (0.017)                                                           | 0.989 | 0.69                                      | 0.981 | 0.32                                                         | 1.000 | 0.99                                              | 0.029                |
|         |                    | 6        | 32627852  | rs1130420 <sup>†</sup>   | G     | A                                 | -0.122 | (0.019)                                                           | 0.888 | $3.5 \times 10^{-6}$                      | 1.023 | 0.22                                                         | 1.055 | $1.8 \times 10^{-5}$                              | $1.2 \times 10^{-4}$ |
| VZV     | gE/Ig <sup>1</sup> | 10       | 91189187  | rs11203123* <sup>†</sup> | A     | C                                 | 0.512  | (0.093)                                                           | 0.948 | 0.71                                      | 0.966 | 0.75                                                         | 0.985 | 0.70                                              | 0.85                 |
|         |                    | 6        | 32623193  | rs9273325                | G     | A                                 | -0.232 | (0.021)                                                           | 0.876 | $4.4 \times 10^{-5}$                      | 0.965 | 0.12                                                         | 1.131 | $4.3 \times 10^{-15}$                             | 0.16                 |
| BKV     | VP1                | 19       | 49206462  | rs681343                 | C     | T                                 | -0.125 | (0.016)                                                           | 1.004 | 0.87                                      | 1.037 | 0.040                                                        | 0.960 | $2.5 \times 10^{-4}$                              | 0.16                 |
| JCV     | VP1                | 6        | 32589842  | rs9271525                | G     | A                                 | -0.318 | (0.031)                                                           | 0.925 | 0.026                                     | 1.015 | 0.53                                                         | 1.060 | $6.8 \times 10^{-5}$                              | $4.7 \times 10^{-3}$ |
|         |                    | 3        | 18238783  | rs776170649 <sup>†</sup> | CT    | C                                 | -0.134 | (0.024)                                                           | 1.006 | 0.86                                      | 0.975 | 0.23                                                         | 1.045 | $9.0 \times 10^{-4}$                              | 0.83                 |
| MCV     | VP1                | 5        | 138865423 | rs7444313                | G     | A                                 | 0.169  | (0.021)                                                           | 0.957 | 0.13                                      | 1.026 | 0.21                                                         | 1.019 | 0.12                                              | 0.033                |
|         |                    | 6        | 32429277  | rs9268847                | A     | G                                 | -0.195 | (0.022)                                                           | 1.018 | 0.54                                      | 0.949 | $8.3 \times 10^{-3}$                                         | 0.968 | $8.4 \times 10^{-3}$                              | 0.14                 |

<sup>1</sup> Cancer types included: non-Hodgkin lymphoma and lymphocytic leukemia

<sup>2</sup> Estimates obtained from a meta-analysis of the UK Biobank and Genetic Epidemiology Research on Aging cohorts [Rashkin et al. (2019) *bioRxiv* 635367]

<sup>3</sup> Summary statistics for European ancestry subjects were obtained from Lam, Chen et al. *Nat Genet.* (2019) 51(12):1670-1678 [PMID: 31740837]

<sup>4</sup> Summary statistics obtained from Jun et al. *Mol Psychiatry.* (2016) 21(1):108-17 [PMID: 25778476]

<sup>†</sup> Proxies for unavailable variants: rs2647006 for rs34825357 (schizophrenia and AD; LD  $r^2=0.99$ ); rs7755774 for rs9269233 (AD; LD  $r^2=0.71$ ); rs3093986 for 6:31486158\_GT\_G (AD; LD  $r^2=0.74$ ); rs7219420 for rs1808192 (AD; LD  $r^2=0.87$ ); rs4713572 for rs1130420 (AD; LD  $r^2=0.91$ ); rs11203124 for rs11203123 (AD; LD  $r^2=1.00$ ); rs7618405 for rs776170649 (AD; LD  $r^2=0.99$ )

\* Multi-allelic variants: rs67886110 (G/T and G/C) and rs11203123 (A/C and A/AC)





**Supplementary Table 7:** Independent sentinel variants in the HLA region identified by clumping (LD  $r^2 < 0.05 \pm 500\text{kb}$ ) associations with  $P < 5 \times 10^{-8}$  for each antigen response phenotype.

| Antigen  | Chr     | Position | Variant     | Alleles    |       | EAF   | Beta   | (SE)    | P                     | INFO                  | Clump Size <sup>1</sup> |      |
|----------|---------|----------|-------------|------------|-------|-------|--------|---------|-----------------------|-----------------------|-------------------------|------|
|          |         |          |             | Effect     | Other |       |        |         |                       |                       |                         |      |
| CMV pp52 | 6       | 32301427 | rs115378818 | C          | T     | 0.986 | 0.633  | (0.095) | $2.8 \times 10^{-11}$ | 0.731                 | 2                       |      |
|          | 6       | 32665840 | rs34825357  | T          | TC    | 0.409 | -0.114 | (0.017) | $2.0 \times 10^{-11}$ | 0.998                 | 779                     |      |
| EBV EA-D | 6       | 31451370 | rs3132470   | A          | G     | 0.855 | 0.159  | (0.024) | $3.4 \times 10^{-11}$ | 1.000                 | 207                     |      |
|          | 6       | 29842444 | rs1611657   | G          | A     | 0.458 | 0.105  | (0.017) | $6.9 \times 10^{-10}$ | 0.996                 | 19                      |      |
|          | 6       | 32583876 | rs117503706 | G          | A     | 0.986 | -0.423 | (0.072) | $4.8 \times 10^{-9}$  | 0.912                 | 15                      |      |
|          | 6       | 30764907 | rs1264377   | G          | A     | 0.818 | 0.119  | (0.022) | $4.7 \times 10^{-8}$  | 1                     | 0                       |      |
|          | 6       | 32451762 | rs9269233   | A          | C     | 0.249 | 0.315  | (0.019) | $3.5 \times 10^{-61}$ | 0.961                 | 3885                    |      |
| EBV EBNA | 6       | 32628432 | rs9273507   | A          | G     | 0.570 | 0.167  | (0.017) | $7.5 \times 10^{-23}$ | 0.994                 | 228                     |      |
|          | 6       | 31884823 | rs3130682   | T          | C     | 0.148 | 0.220  | (0.023) | $3.0 \times 10^{-21}$ | 0.993                 | 269                     |      |
|          | 6       | 32390436 | rs143810596 | T          | G     | 0.977 | -0.538 | (0.058) | $1.3 \times 10^{-20}$ | 0.989                 | 51                      |      |
|          | 6       | 31297772 | rs9265517   | C          | T     | 0.233 | 0.172  | (0.020) | $4.5 \times 10^{-18}$ | 0.975                 | 967                     |      |
|          | 6       | 33048628 | rs1042136   | A          | C     | 0.838 | 0.176  | (0.023) | $1.3 \times 10^{-14}$ | 0.991                 | 158                     |      |
|          | 6       | 31835164 | rs693906    | G          | C     | 0.842 | 0.177  | (0.023) | $2.0 \times 10^{-14}$ | 0.984                 | 130                     |      |
|          | 6       | 31892641 | rs9267677   | T          | C     | 0.905 | 0.206  | (0.028) | $3.6 \times 10^{-13}$ | 1                     | 58                      |      |
|          | 6       | 32201469 | rs41315395  | C          | A     | 0.855 | -0.167 | (0.023) | $1.2 \times 10^{-12}$ | 0.997                 | 3                       |      |
|          | 6       | 32387809 | rs2395163   | T          | C     | 0.779 | 0.144  | (0.020) | $2.0 \times 10^{-12}$ | 1                     | 25                      |      |
|          | 6       | 29822779 | 6:29822779  | AAAAC      | A     | 0.365 | 0.114  | (0.017) | $4.1 \times 10^{-11}$ | 0.999                 | 113                     |      |
|          | 6       | 33083096 | rs6457714   | T          | A     | 0.789 | -0.132 | (0.020) | $6.8 \times 10^{-11}$ | 0.997                 | 35                      |      |
|          | 6       | 32609147 | rs12722051  | A          | T     | 0.795 | 0.127  | (0.021) | $1.3 \times 10^{-9}$  | 0.989                 | 7                       |      |
|          | 6       | 31198786 | rs3130935   | A          | G     | 0.621 | 0.098  | (0.017) | $1.5 \times 10^{-8}$  | 1.000                 | 7                       |      |
|          | 6       | 32623017 | rs28468461  | T          | C     | 0.969 | -0.256 | (0.046) | $2.9 \times 10^{-8}$  | 0.993                 | 0                       |      |
|          | 6       | 32542378 | rs116206645 | T          | A     | 0.979 | 0.403  | (0.074) | $5.0 \times 10^{-8}$  | 0.699                 | 0                       |      |
|          | EBV p18 | 6        | 31486158    | 6:31486158 | GT    | G     | 0.245  | 0.197   | (0.018)               | $7.1 \times 10^{-27}$ | 0.994                   | 1651 |
|          |         | 6        | 32589978    | rs9271536  | A     | T     | 0.179  | 0.200   | (0.020)               | $3.9 \times 10^{-23}$ | 0.999                   | 2455 |
| 6        |         | 32069806 | rs3096695   | G          | C     | 0.145 | 0.208  | (0.022) | $1.6 \times 10^{-20}$ | 0.997                 | 16                      |      |
| 6        |         | 30921417 | 6:30921417  | GA         | G     | 0.119 | 0.165  | (0.025) | $2.7 \times 10^{-11}$ | 0.975                 | 42                      |      |
| 6        |         | 30727983 | rs3095339   | A          | G     | 0.722 | 0.112  | (0.017) | $7.3 \times 10^{-11}$ | 1.000                 | 24                      |      |
| 6        |         | 32797876 | rs241436    | A          | G     | 0.549 | 0.099  | (0.016) | $2.4 \times 10^{-10}$ | 1                     | 2                       |      |
| 6        |         | 31379391 | rs3828879   | C          | T     | 0.876 | 0.147  | (0.024) | $5.1 \times 10^{-10}$ | 1.000                 | 3                       |      |
| 6        |         | 32206539 | rs3134937   | C          | T     | 0.751 | 0.112  | (0.018) | $6.3 \times 10^{-10}$ | 0.981                 | 20                      |      |
| 6        |         | 33073440 | rs2064475   | G          | A     | 0.768 | 0.111  | (0.019) | $2.2 \times 10^{-9}$  | 1.000                 | 21                      |      |
| 6        |         | 32045864 | rs781341398 | GAA        | G     | 0.966 | -0.277 | (0.046) | $2.7 \times 10^{-9}$  | 0.922                 | 2                       |      |
| 6        |         | 32754876 | rs116309362 | T          | C     | 0.976 | -0.335 | (0.057) | $3.5 \times 10^{-9}$  | 0.895                 | 1                       |      |
| 6        |         | 26370707 | rs9379862   | T          | C     | 0.743 | 0.103  | (0.018) | $5.6 \times 10^{-9}$  | 1.000                 | 1                       |      |
| 6        |         | 31448564 | rs3099843   | G          | T     | 0.855 | 0.126  | (0.022) | $1.1 \times 10^{-8}$  | 1.000                 | 12                      |      |
| 6        |         | 31362207 | rs1052409   | T          | C     | 0.845 | 0.125  | (0.022) | $1.2 \times 10^{-8}$  | 0.978                 | 7                       |      |
| 6        |         | 28039586 | rs4713135   | G          | A     | 0.761 | 0.102  | (0.019) | $3.4 \times 10^{-8}$  | 1                     | 0                       |      |
| 6        |         | 32637772 | rs9274728   | A          | G     | 0.718 | -0.315 | (0.018) | $4.7 \times 10^{-67}$ | 0.995                 | 3836                    |      |

|              |          |            |             |             |       |        |         |                      |                       |                       |       |      |
|--------------|----------|------------|-------------|-------------|-------|--------|---------|----------------------|-----------------------|-----------------------|-------|------|
| EBV<br>ZEBRA | 6        | 32045864   | rs781341398 | GAA         | G     | 0.966  | -0.428  | (0.048)              | $5.1 \times 10^{-19}$ | 0.922                 | 20    |      |
|              | 6        | 32211085   | rs412657    | T           | G     | 0.622  | 0.145   | (0.017)              | $1.0 \times 10^{-17}$ | 1                     | 321   |      |
|              | 6        | 32774954   | rs6917611   | G           | C     | 0.608  | 0.142   | (0.017)              | $1.9 \times 10^{-17}$ | 1.000                 | 198   |      |
|              | 6        | 32634588   | rs113140854 | C           | T     | 0.983  | -0.534  | (0.067)              | $1.5 \times 10^{-15}$ | 0.827                 | 253   |      |
|              | 6        | 31672242   | rs28366157  | A           | G     | 0.937  | -0.266  | (0.034)              | $2.3 \times 10^{-15}$ | 0.997                 | 374   |      |
|              | 6        | 31418810   | rs3131623   | T           | A     | 0.817  | 0.167   | (0.021)              | $2.6 \times 10^{-15}$ | 0.992                 | 610   |      |
|              | 6        | 29923351   | rs2904758   | G           | A     | 0.280  | 0.144   | (0.018)              | $5.0 \times 10^{-15}$ | 0.990                 | 97    |      |
|              | 6        | 32635948   | rs541213498 | C           | T     | 0.987  | -0.586  | (0.078)              | $4.8 \times 10^{-14}$ | 0.780                 | 5     |      |
|              | 6        | 32626702   | rs35779483  | A           | G     | 0.693  | -0.135  | (0.018)              | $6.1 \times 10^{-14}$ | 0.999                 | 33    |      |
|              | 6        | 30820373   | rs2263298   | C           | T     | 0.849  | 0.154   | (0.023)              | $2.4 \times 10^{-11}$ | 1.000                 | 200   |      |
|              | 6        | 33017502   | rs3130177   | G           | A     | 0.717  | -0.121  | (0.018)              | $3.1 \times 10^{-11}$ | 0.996                 | 5     |      |
|              | 6        | 31150844   | rs138206303 | A           | AGT   | 0.883  | -0.167  | (0.025)              | $4.8 \times 10^{-11}$ | 0.975                 | 22    |      |
|              | 6        | 31928799   | rs419788    | T           | C     | 0.324  | -0.113  | (0.017)              | $1.0 \times 10^{-10}$ | 1                     | 8     |      |
|              | 6        | 32581008   | rs3129747   | T           | C     | 0.698  | -0.108  | (0.018)              | $1.2 \times 10^{-9}$  | 0.989                 | 8     |      |
|              | 6        | 30434999   | rs2516670   | G           | A     | 0.160  | 0.132   | (0.022)              | $3.3 \times 10^{-9}$  | 1                     | 2     |      |
|              | 6        | 33045823   | rs2073520   | A           | G     | 0.868  | 0.145   | (0.025)              | $5.7 \times 10^{-9}$  | 0.972                 | 1     |      |
| 6            | 32707395 | rs28371351 | G           | A           | 0.988 | -0.519 | (0.095) | $4.2 \times 10^{-8}$ | 0.647                 | 0                     |       |      |
| HHV7         | 6        | 32602665   | rs139299944 | C           | CT    | 0.655  | 0.114   | (0.017)              | $1.5 \times 10^{-11}$ | 0.998                 | 437   |      |
| HSV1         | 6        | 32627852   | rs1130420   | G           | A     | 0.583  | -0.122  | (0.019)              | $2.5 \times 10^{-10}$ | 0.976                 | 61    |      |
| VZV          | 6        | 32623193   | rs9273325   | G           | A     | 0.831  | -0.232  | (0.021)              | $8.2 \times 10^{-28}$ | 0.998                 | 2708  |      |
|              | 6        | 31323506   | rs4990036   | C           | T     | 0.851  | -0.240  | (0.023)              | $4.5 \times 10^{-26}$ | 0.997                 | 972   |      |
|              | 6        | 32014828   | rs433061    | G           | A     | 0.869  | -0.249  | (0.024)              | $6.5 \times 10^{-26}$ | 0.999                 | 69    |      |
|              | 6        | 30743729   | rs3130668   | G           | A     | 0.855  | -0.228  | (0.023)              | $1.9 \times 10^{-22}$ | 0.978                 | 271   |      |
|              | 6        | 29986324   | rs3115631   | T           | A     | 0.873  | -0.229  | (0.025)              | $4.1 \times 10^{-20}$ | 0.955                 | 1442  |      |
|              | 6        | 29356331   | rs9257809   | A           | G     | 0.875  | -0.216  | (0.024)              | $1.5 \times 10^{-18}$ | 1                     | 147   |      |
|              | 6        | 28734676   | rs1233604   | G           | A     | 0.882  | -0.215  | (0.025)              | $2.5 \times 10^{-17}$ | 1                     | 291   |      |
|              | 6        | 28214698   | rs17720293  | C           | T     | 0.866  | -0.191  | (0.024)              | $2.1 \times 10^{-15}$ | 1                     | 192   |      |
|              | 6        | 27556141   | rs13201294  | A           | T     | 0.870  | -0.182  | (0.024)              | $7.1 \times 10^{-14}$ | 0.996                 | 94    |      |
|              | 6        | 26743531   | rs13211434  | G           | C     | 0.878  | -0.188  | (0.025)              | $1.1 \times 10^{-13}$ | 0.938                 | 241   |      |
|              | 6        | 26189356   | rs13204572  | G           | C     | 0.896  | -0.166  | (0.027)              | $5.8 \times 10^{-10}$ | 0.996                 | 37    |      |
|              | 6        | 32589842   | rs9271525   | G           | A     | 0.163  | -0.137  | (0.022)              | $1.0 \times 10^{-9}$  | 0.977                 | 229   |      |
|              | 6        | 30020252   | rs546626159 | A           | ATT   | 0.749  | 0.108   | (0.020)              | $3.0 \times 10^{-8}$  | 0.968                 | 0     |      |
|              | JCV      | 6          | 32589842    | rs9271525   | G     | A      | 0.163   | -0.318               | (0.031)               | $3.9 \times 10^{-24}$ | 0.977 | 2335 |
|              |          | 6          | 32080146    | rs3130342   | A     | C      | 0.149   | -0.245               | (0.032)               | $1.3 \times 10^{-14}$ | 1     | 43   |
|              |          | 6          | 31574306    | rs372079459 | T     | TAA    | 0.198   | -0.163               | (0.028)               | $5.0 \times 10^{-9}$  | 0.972 | 2    |
| MCV          | 6        | 32429277   | rs9268847   | A           | G     | 0.750  | -0.195  | (0.022)              | $2.4 \times 10^{-19}$ | 0.995                 | 2450  |      |
|              | 6        | 32760665   | rs113322198 | C           | CACTT | 0.224  | -0.196  | (0.024)              | $2.3 \times 10^{-16}$ | 0.996                 | 328   |      |
|              | 6        | 32232358   | rs9268070   | T           | C     | 0.149  | -0.216  | (0.029)              | $5.0 \times 10^{-14}$ | 0.999                 | 38    |      |
|              | 6        | 29924127   | rs148584120 | T           | C     | 0.958  | 0.375   | (0.052)              | $7.7 \times 10^{-13}$ | 0.972                 | 160   |      |
|              | 6        | 30475514   | 6:30475514  | TGTGC       | T     | 0.959  | 0.320   | (0.052)              | $9.6 \times 10^{-10}$ | 0.966                 | 10    |      |
|              | 6        | 31561211   | rs2736190   | T           | C     | 0.269  | -0.134  | (0.022)              | $2.1 \times 10^{-9}$  | 0.993                 | 5     |      |
|              | 6        | 27763714   | rs76148407  | C           | G     | 0.966  | 0.299   | (0.055)              | $4.8 \times 10^{-8}$  | 0.971                 | 0     |      |

**Supplementary Table 8:** Conditionally independent genome-wide significant ( $P_{\text{cond}} < 5 \times 10^{-8}$ ) variants in the HLA identified through forward iterative conditional analyses for each antigen response phenotype.

| Antigen      | Round <sup>1</sup> | Chr | Position | Variant     | Alleles |       | EAF   | Beta   | (SE)    | $P_{\text{cond}}$     | INFO  |
|--------------|--------------------|-----|----------|-------------|---------|-------|-------|--------|---------|-----------------------|-------|
|              |                    |     |          |             | Effect  | Other |       |        |         |                       |       |
| EBV<br>EBNA  | 0                  | 6   | 32451762 | rs9269233   | A       | C     | 0.249 | 0.315  | (0.019) | $3.5 \times 10^{-61}$ | 0.961 |
|              | 1                  | 6   | 32602665 | rs139299944 | C       | CT    | 0.655 | -0.160 | (0.017) | $5.9 \times 10^{-21}$ | 0.998 |
|              | 2                  | 6   | 33045272 | rs6457711   | C       | A     | 0.752 | -0.129 | (0.019) | $1.3 \times 10^{-11}$ | 0.994 |
|              | 3                  | 6   | 32626019 | rs9273358   | C       | T     | 0.548 | 0.110  | (0.017) | $9.0 \times 10^{-11}$ | 0.996 |
|              | 4                  | 6   | 32626451 | rs28414666  | G       | A     | 0.789 | 0.221  | (0.035) | $4.8 \times 10^{-10}$ | 0.997 |
|              | 5                  | 6   | 33047612 | rs3097671   | G       | C     | 0.835 | 0.133  | (0.022) | $2.1 \times 10^{-9}$  | 1     |
| EBV<br>ZEBRA | 0                  | 6   | 32637772 | rs9274728   | A       | G     | 0.718 | -0.315 | (0.018) | $4.7 \times 10^{-67}$ | 0.995 |
|              | 1                  | 6   | 29923351 | rs2904758   | G       | A     | 0.280 | 0.115  | (0.018) | $2.2 \times 10^{-10}$ | 0.990 |
|              | 2                  | 6   | 33034507 | rs35683320  | G       | A     | 0.825 | 0.129  | (0.022) | $1.9 \times 10^{-9}$  | 0.982 |
|              | 3                  | 6   | 32783405 | rs1383258   | C       | T     | 0.962 | 0.235  | (0.042) | $3.3 \times 10^{-8}$  | 1.000 |
| EBV p18      | 0                  | 6   | 31486158 | 6:31486158  | GT      | G     | 0.245 | 0.197  | (0.018) | $7.1 \times 10^{-27}$ | 0.994 |
|              | 1                  | 6   | 31247169 | rs6917363   | G       | A     | 0.431 | 0.102  | (0.016) | $2.7 \times 10^{-10}$ | 0.999 |
|              | 2                  | 6   | 32582513 | rs9271325   | C       | G     | 0.527 | 0.099  | (0.016) | $7.3 \times 10^{-10}$ | 1.000 |
|              | 3                  | 6   | 31356536 | rs66479476  | A       | G     | 0.784 | 0.110  | (0.020) | $3.9 \times 10^{-8}$  | 0.963 |
| MCV          | 0                  | 6   | 32429277 | rs9268847   | A       | G     | 0.750 | -0.195 | (0.022) | $2.4 \times 10^{-19}$ | 0.995 |
|              | 1                  | 6   | 29924127 | rs148584120 | T       | C     | 0.958 | 0.350  | (0.052) | $1.6 \times 10^{-11}$ | 0.972 |
|              | 2                  | 6   | 32797488 | rs4148874   | C       | T     | 0.264 | -0.158 | (0.022) | $1.1 \times 10^{-12}$ | 1     |
| EBV EA-D     | 0                  | 6   | 32665840 | rs34825357  | T       | TC    | 0.409 | -0.114 | (0.017) | $2.0 \times 10^{-11}$ | 0.998 |
|              | 1                  | 6   | 32655730 | rs3129783   | A       | G     | 0.471 | 0.100  | (0.017) | $8.4 \times 10^{-9}$  | 0.980 |
| CMV pp52     | 0                  | 6   | 32301427 | rs115378818 | C       | T     | 0.978 | 0.633  | (0.095) | $2.8 \times 10^{-11}$ | 0.731 |
| HHV7         | 0                  | 6   | 32602665 | rs139299944 | C       | CT    | 0.655 | 0.114  | (0.017) | $1.5 \times 10^{-11}$ | 0.998 |
| HSV1         | 0                  | 6   | 32627852 | rs1130420   | G       | A     | 0.583 | -0.122 | (0.019) | $2.5 \times 10^{-10}$ | 0.976 |
| VZV          | 0                  | 6   | 32589842 | rs9271525   | G       | A     | 0.831 | -0.318 | (0.031) | $3.9 \times 10^{-24}$ | 0.977 |
| JCV          | 0                  | 6   | 32623193 | rs9273325   | G       | A     | 0.163 | -0.232 | (0.021) | $8.2 \times 10^{-28}$ | 0.998 |

<sup>1</sup> Conditional analysis round. Round 0 corresponds to results from unconditional analyses (not adjusted for any SNPs/indels).

**Supplementary Table 9:** Forty independent sentinel variants in the HLA region identified by clumping (LD  $r^2 < 0.05$   $\pm 500$ kb) associations with  $P < 5 \times 10^{-8}$  across 10 antigen response phenotypes.

| Primary Phenotype | Chr | Position | Variant     | Alleles |       | EAF   | Beta   | (SE)    | P                     | INFO  | Clump Size <sup>1</sup> |
|-------------------|-----|----------|-------------|---------|-------|-------|--------|---------|-----------------------|-------|-------------------------|
|                   |     |          |             | Effect  | Other |       |        |         |                       |       |                         |
| EBV ZEBRA         | 6   | 32637772 | rs9274728   | G       | A     | 0.718 | -0.315 | (0.018) | $4.7 \times 10^{-67}$ | 0.995 | 14065                   |
| EBV EBNA          | 6   | 32633879 | rs9274490   | G       | A     | 0.742 | 0.259  | (0.019) | $1.6 \times 10^{-40}$ | 0.997 | 4788                    |
| EBV EBNA          | 6   | 32608521 | rs6907155   | A       | C     | 0.907 | -0.317 | (0.029) | $2.9 \times 10^{-27}$ | 0.945 | 152                     |
| EBV p18           | 6   | 31486158 | 6:31486158  | G       | GT    | 0.245 | 0.197  | (0.018) | $7.1 \times 10^{-27}$ | 0.994 | 4087                    |
| VZV               | 6   | 31323506 | rs4990036   | T       | C     | 0.851 | -0.240 | (0.023) | $4.5 \times 10^{-26}$ | 0.997 | 1022                    |
| VZV               | 6   | 32014828 | rs433061    | A       | G     | 0.869 | -0.249 | (0.024) | $6.5 \times 10^{-26}$ | 0.999 | 323                     |
| VZV               | 6   | 30743729 | rs3130668   | A       | G     | 0.855 | -0.228 | (0.023) | $1.9 \times 10^{-22}$ | 0.978 | 509                     |
| EBV EBNA          | 6   | 32006317 | rs6468      | T       | C     | 0.197 | 0.195  | (0.021) | $1.4 \times 10^{-20}$ | 0.963 | 353                     |
| VZV               | 6   | 29986324 | rs3115631   | A       | T     | 0.873 | -0.229 | (0.025) | $4.1 \times 10^{-20}$ | 0.955 | 1499                    |
| EBV ZEBRA         | 6   | 32045864 | rs781341398 | G       | GAA   | 0.966 | -0.428 | (0.048) | $5.1 \times 10^{-19}$ | 0.922 | 9                       |
| VZV               | 6   | 29356331 | rs9257809   | G       | A     | 0.875 | -0.216 | (0.024) | $1.5 \times 10^{-18}$ | 1     | 147                     |
| EBV p18           | 6   | 32786917 | rs3763354   | A       | G     | 0.225 | 0.160  | (0.018) | $4.6 \times 10^{-18}$ | 1     | 687                     |
| VZV               | 6   | 28734676 | rs1233604   | A       | G     | 0.882 | -0.215 | (0.025) | $2.5 \times 10^{-17}$ | 1     | 291                     |
| EBV ZEBRA         | 6   | 32634588 | rs113140854 | T       | C     | 0.983 | -0.534 | (0.067) | $1.5 \times 10^{-15}$ | 0.827 | 257                     |
| VZV               | 6   | 28214698 | rs17720293  | T       | C     | 0.866 | -0.191 | (0.024) | $2.1 \times 10^{-15}$ | 1     | 193                     |
| EBV ZEBRA         | 6   | 31672242 | rs28366157  | G       | A     | 0.937 | -0.266 | (0.034) | $2.3 \times 10^{-15}$ | 0.997 | 197                     |
| EBV EBNA          | 6   | 33048628 | rs1042136   | C       | A     | 0.838 | 0.176  | (0.023) | $1.3 \times 10^{-14}$ | 0.991 | 185                     |
| MCV               | 6   | 32630837 | 6:32630837  | T       | G     | 0.891 | -0.233 | (0.030) | $1.5 \times 10^{-14}$ | 0.959 | 162                     |
| EBV EBNA          | 6   | 32551368 | rs138008524 | G       | A     | 0.985 | -0.625 | (0.081) | $1.9 \times 10^{-14}$ | 0.666 | 0                       |
| EBV ZEBRA         | 6   | 32635948 | rs541213498 | T       | C     | 0.987 | -0.586 | (0.078) | $4.8 \times 10^{-14}$ | 0.780 | 2                       |
| VZV               | 6   | 27556141 | rs13201294  | T       | A     | 0.870 | -0.182 | (0.024) | $7.1 \times 10^{-14}$ | 0.996 | 94                      |
| VZV               | 6   | 26743531 | rs13211434  | C       | G     | 0.878 | -0.188 | (0.025) | $1.1 \times 10^{-13}$ | 0.938 | 243                     |
| EBV ZEBRA         | 6   | 29796768 | rs1632940   | C       | T     | 0.227 | 0.145  | (0.020) | $2.3 \times 10^{-13}$ | 0.991 | 268                     |
| EBV EBNA          | 6   | 31892641 | rs9267677   | C       | T     | 0.905 | 0.206  | (0.028) | $3.6 \times 10^{-13}$ | 1     | 53                      |
| EBV p18           | 6   | 30921417 | 6:30921417  | G       | GA    | 0.119 | 0.165  | (0.025) | $2.7 \times 10^{-11}$ | 0.975 | 40                      |
| EBV EBNA          | 6   | 32598090 | rs1281943   | C       | T     | 0.913 | 0.211  | (0.032) | $4.0 \times 10^{-11}$ | 0.919 | 16                      |
| EBV ZEBRA         | 6   | 31150844 | rs138206303 | AGT     | A     | 0.883 | -0.167 | (0.025) | $4.8 \times 10^{-11}$ | 0.975 | 31                      |
| MCV               | 6   | 30364587 | rs2516687   | T       | A     | 0.960 | 0.341  | (0.052) | $5.3 \times 10^{-11}$ | 1     | 26                      |
| EBV EBNA          | 6   | 33083096 | rs6457714   | A       | T     | 0.789 | -0.132 | (0.020) | $6.8 \times 10^{-11}$ | 0.997 | 39                      |
| VZV               | 6   | 32853288 | rs2244447   | G       | C     | 0.592 | -0.106 | (0.017) | $2.9 \times 10^{-10}$ | 0.995 | 3                       |
| EBV EBNA          | 6   | 32965942 | rs176248    | A       | G     | 0.707 | 0.115  | (0.018) | $3.2 \times 10^{-10}$ | 1     | 1                       |
| EBV p18           | 6   | 31379391 | rs3828879   | T       | C     | 0.876 | 0.147  | (0.024) | $5.1 \times 10^{-10}$ | 1.000 | 0                       |
| VZV               | 6   | 26189356 | rs13204572  | C       | G     | 0.896 | -0.166 | (0.027) | $5.8 \times 10^{-10}$ | 0.996 | 37                      |
| EBV EA-D          | 6   | 32583876 | rs117503706 | A       | G     | 0.986 | -0.423 | (0.072) | $4.8 \times 10^{-9}$  | 0.912 | 15                      |
| EBV EBNA          | 6   | 32587835 | rs71542419  | A       | C     | 0.916 | -0.168 | (0.029) | $9.5 \times 10^{-9}$  | 0.973 | 6                       |
| EBV p18           | 6   | 31362207 | rs1052409   | C       | T     | 0.845 | 0.125  | (0.022) | $1.2 \times 10^{-8}$  | 0.978 | 7                       |
| EBV EBNA          | 6   | 32722961 | rs71565347  | A       | G     | 0.983 | 0.374  | (0.067) | $2.7 \times 10^{-8}$  | 0.991 | 3                       |

|           |   |          |             |   |   |       |        |         |                      |       |   |
|-----------|---|----------|-------------|---|---|-------|--------|---------|----------------------|-------|---|
| EBV ZEBRA | 6 | 32707395 | rs28371351  | A | G | 0.988 | -0.519 | (0.095) | $4.2 \times 10^{-8}$ | 0.647 | 0 |
| MCV       | 6 | 27763714 | rs76148407  | G | C | 0.966 | 0.299  | (0.055) | $4.8 \times 10^{-8}$ | 0.971 | 0 |
| EBV EBNA  | 6 | 32542378 | rs116206645 | A | T | 0.979 | 0.403  | (0.074) | $5.0 \times 10^{-8}$ | 0.699 | 0 |

<sup>1</sup> Clump size refers to the number of non-independent ( $LD r^2 > 0.05$ ) variants clumped together with the sentinel variant

**Supplementary Table 10:** Associations from conditional analyses of classical HLA alleles associated with EBV ZEBRA antigen response at the Bonferroni-corrected threshold of  $P < 5 \times 10^{-4}$ . Independent alleles identified at each round are in bold.

| Allele            | Unconditional (Round 0) |                |                                         | Conditional Round 1 |                |                                         | Conditional Round 2 |                |                                         | Conditional Round 3 |                |                                         | Conditional Round 4 |                |                                        | Conditional Round 5 |         |                      |
|-------------------|-------------------------|----------------|-----------------------------------------|---------------------|----------------|-----------------------------------------|---------------------|----------------|-----------------------------------------|---------------------|----------------|-----------------------------------------|---------------------|----------------|----------------------------------------|---------------------|---------|----------------------|
|                   | Beta                    | (SE)           | P                                       | Beta                | (SE)           | $P_{cond}$                              | Beta                | (S)E           | $P_{cond}$                              | Beta                | (SE)           | $P_{cond}$                              | Beta                | (SE)           | $P_{cond}$                             | Beta                | (SE)    | $P_{cond}$           |
| <b>DRB4*99:01</b> | <b>-0.246</b>           | <b>(0.017)</b> | <b><math>1.4 \times 10^{-46}</math></b> | -                   | -              | -                                       | -                   | -              | -                                       | -                   | -              | -                                       | -                   | -              | -                                      | -                   | -       | -                    |
| <b>DQB1*04:02</b> | 0.415                   | (0.056)        | $1.3 \times 10^{-13}$                   | <b>0.504</b>        | <b>(0.055)</b> | <b><math>1.0 \times 10^{-19}</math></b> | -                   | -              | -                                       | -                   | -              | -                                       | -                   | -              | -                                      | -                   | -       | -                    |
| <b>DRB1*04:04</b> | 0.508                   | (0.042)        | $6.8 \times 10^{-34}$                   | 0.378               | (0.043)        | $1.1 \times 10^{-18}$                   | <b>0.376</b>        | <b>(0.042)</b> | <b><math>1.1 \times 10^{-18}</math></b> | -                   | -              | -                                       | -                   | -              | -                                      | -                   | -       | -                    |
| <b>DQA1*02:01</b> | 0.254                   | (0.023)        | $4.9 \times 10^{-27}$                   | 0.096               | (0.028)        | $6.3 \times 10^{-4}$                    | 0.098               | (0.028)        | $4.4 \times 10^{-4}$                    | <b>0.187</b>        | <b>(0.029)</b> | <b><math>1.1 \times 10^{-10}</math></b> | -                   | -              | -                                      | -                   | -       | -                    |
| <b>A*03:01</b>    | 0.107                   | (0.024)        | $6.2 \times 10^{-6}$                    | 0.125               | (0.023)        | $8.4 \times 10^{-8}$                    | 0.128               | (0.023)        | $3.2 \times 10^{-8}$                    | 0.125               | (0.023)        | $5.8 \times 10^{-8}$                    | <b>0.129</b>        | <b>(0.023)</b> | <b><math>1.9 \times 10^{-8}</math></b> | -                   | -       | -                    |
| DRB3*99:01        | 0.202                   | (0.017)        | $7.4 \times 10^{-32}$                   | 0.100               | (0.020)        | $6.7 \times 10^{-7}$                    | 0.067               | (0.020)        | $9.5 \times 10^{-4}$                    | 0.063               | (0.020)        | $2.0 \times 10^{-3}$                    | 0.060               | (0.020)        | $2.7 \times 10^{-3}$                   | 0.043               | (0.020) | 0.036                |
| DRB1*07:01        | 0.251                   | (0.023)        | $1.3 \times 10^{-26}$                   | 0.093               | (0.028)        | $9.2 \times 10^{-4}$                    | 0.094               | (0.028)        | $7.1 \times 10^{-4}$                    | 0.184               | (0.029)        | $2.4 \times 10^{-10}$                   | -0.038              | (0.185)        | 0.84                                   | -0.050              | (0.184) | 0.79                 |
| DQB1*02:02        | 0.300                   | (0.030)        | $4.5 \times 10^{-23}$                   | 0.128               | (0.034)        | $1.5 \times 10^{-4}$                    | 0.135               | (0.034)        | $6.1 \times 10^{-5}$                    | 0.217               | (0.034)        | $2.8 \times 10^{-10}$                   | 0.115               | (0.053)        | 0.029                                  | 0.120               | (0.053) | 0.022                |
| DRB4*01:01        | 0.293                   | (0.030)        | $7.9 \times 10^{-22}$                   | 0.137               | (0.033)        | $3.2 \times 10^{-5}$                    | 0.139               | (0.033)        | $2.3 \times 10^{-5}$                    | 0.200               | (0.033)        | $1.9 \times 10^{-9}$                    | 0.114               | (0.040)        | $4.7 \times 10^{-3}$                   | 0.112               | (0.040) | $5.7 \times 10^{-3}$ |
| DQB1*03:02        | 0.251                   | (0.027)        | $5.2 \times 10^{-21}$                   | 0.103               | (0.029)        | $4.4 \times 10^{-4}$                    | 0.107               | (0.029)        | $2.6 \times 10^{-4}$                    | -0.057              | (0.035)        | 0.10                                    | 0.060               | (0.040)        | 0.13                                   | 0.057               | (0.040) | 0.15                 |
| DRB4*01:03        | 0.173                   | (0.019)        | $7.0 \times 10^{-20}$                   | -0.142              | (0.032)        | $1.1 \times 10^{-5}$                    | -0.144              | (0.032)        | $8.1 \times 10^{-6}$                    | -0.194              | (0.032)        | $2.2 \times 10^{-9}$                    | -0.112              | (0.039)        | $3.9 \times 10^{-3}$                   | -0.110              | (0.039) | $4.7 \times 10^{-3}$ |
| DQA1*05:01        | -0.169                  | (0.019)        | $5.7 \times 10^{-18}$                   | -0.067              | (0.021)        | $1.4 \times 10^{-3}$                    | -0.043              | (0.021)        | 0.043                                   | -0.039              | (0.021)        | 0.066                                   | -0.038              | (0.021)        | 0.074                                  | -0.019              | (0.021) | 0.36                 |
| DQA1*03:01        | 0.168                   | (0.020)        | $1.3 \times 10^{-16}$                   | -0.044              | (0.027)        | 0.10                                    | -0.047              | (0.027)        | 0.080                                   | -0.145              | (0.028)        | $2.8 \times 10^{-7}$                    | 0.153               | (0.073)        | 0.036                                  | 0.148               | (0.073) | 0.043                |
| DRB1*03:01        | -0.172                  | (0.023)        | $5.1 \times 10^{-14}$                   | -0.077              | (0.024)        | $1.2 \times 10^{-3}$                    | -0.058              | (0.024)        | 0.015                                   | -0.055              | (0.024)        | 0.020                                   | -0.055              | (0.024)        | 0.019                                  | -0.037              | (0.024) | 0.12                 |
| DQB1*02:01        | -0.170                  | (0.023)        | $9.8 \times 10^{-14}$                   | -0.078              | (0.024)        | $9.3 \times 10^{-4}$                    | -0.059              | (0.024)        | 0.012                                   | -0.057              | (0.023)        | 0.016                                   | -0.057              | (0.023)        | 0.014                                  | -0.039              | (0.024) | 0.097                |
| DRB3*01:01        | -0.154                  | (0.022)        | $1.3 \times 10^{-12}$                   | -0.054              | (0.023)        | 0.018                                   | -0.033              | (0.023)        | 0.15                                    | -0.031              | (0.023)        | 0.17                                    | -0.031              | (0.023)        | 0.17                                   | -0.014              | (0.023) | 0.52                 |
| DQA1*04:01        | 0.402                   | (0.057)        | $1.9 \times 10^{-12}$                   | 0.506               | (0.057)        | $4.2 \times 10^{-19}$                   | 0.114               | (0.232)        | 0.62                                    | 0.107               | (0.231)        | 0.64                                    | 0.064               | (0.230)        | 0.78                                   | 0.073               | (0.230) | 0.75                 |
| DRB1*08:01        | 0.409                   | (0.059)        | $3.9 \times 10^{-12}$                   | 0.519               | (0.058)        | $7.2 \times 10^{-19}$                   | 0.118               | (0.204)        | 0.56                                    | 0.125               | (0.203)        | 0.54                                    | 0.093               | (0.203)        | 0.65                                   | 0.088               | (0.202) | 0.66                 |
| B*08:01           | -0.157                  | (0.023)        | $2.1 \times 10^{-11}$                   | -0.080              | (0.024)        | $7.3 \times 10^{-4}$                    | -0.062              | (0.024)        | $9.2 \times 10^{-3}$                    | -0.062              | (0.024)        | $9.0 \times 10^{-3}$                    | -0.062              | (0.024)        | $8.8 \times 10^{-3}$                   | -0.040              | (0.024) | 0.093                |
| C*07:01           | -0.135                  | (0.021)        | $2.6 \times 10^{-10}$                   | -0.072              | (0.022)        | $8.0 \times 10^{-4}$                    | -0.057              | (0.022)        | $7.9 \times 10^{-3}$                    | -0.055              | (0.021)        | $9.9 \times 10^{-3}$                    | -0.053              | (0.021)        | 0.013                                  | -0.034              | (0.022) | 0.12                 |
| B*44:03           | 0.215                   | (0.034)        | $4.4 \times 10^{-10}$                   | 0.101               | (0.035)        | $3.8 \times 10^{-3}$                    | 0.102               | (0.035)        | $3.5 \times 10^{-3}$                    | 0.140               | (0.035)        | $6.1 \times 10^{-5}$                    | 0.076               | (0.037)        | 0.039                                  | 0.089               | (0.037) | 0.016                |
| DPB1*06:01        | 0.550                   | (0.091)        | $1.7 \times 10^{-9}$                    | 0.386               | (0.091)        | $2.1 \times 10^{-5}$                    | 0.379               | (0.090)        | $2.7 \times 10^{-5}$                    | 0.019               | (0.101)        | 0.85                                    | 0.027               | (0.101)        | 0.79                                   | 0.028               | (0.101) | 0.78                 |
| DRB3*02:02        | -0.142                  | (0.024)        | $4.3 \times 10^{-9}$                    | -0.055              | (0.025)        | 0.026                                   | -0.034              | (0.025)        | 0.17                                    | -0.031              | (0.025)        | 0.21                                    | -0.029              | (0.025)        | 0.24                                   | -0.020              | (0.025) | 0.41                 |
| DQA1*01:02        | -0.116                  | (0.021)        | $2.2 \times 10^{-8}$                    | -0.015              | (0.022)        | 0.48                                    | 0.008               | (0.022)        | 0.72                                    | 0.011               | (0.022)        | 0.60                                    | 0.014               | (0.022)        | 0.52                                   | -0.002              | (0.022) | 0.92                 |
| C*16:01           | 0.219                   | (0.040)        | $3.0 \times 10^{-8}$                    | 0.111               | (0.040)        | $5.4 \times 10^{-3}$                    | 0.109               | (0.040)        | $6.1 \times 10^{-3}$                    | 0.142               | (0.040)        | $3.5 \times 10^{-4}$                    | 0.082               | (0.041)        | 0.045                                  | 0.092               | (0.041) | 0.024                |

|            |        |         |                      |        |         |                      |        |          |                      |        |         |                      |        |         |                      |        |         |                      |
|------------|--------|---------|----------------------|--------|---------|----------------------|--------|----------|----------------------|--------|---------|----------------------|--------|---------|----------------------|--------|---------|----------------------|
| A*29:02    | 0.209  | (0.042) | $6.6 \times 10^{-7}$ | 0.130  | (0.042) | $1.9 \times 10^{-3}$ | 0.127  | (0.042)  | $2.4 \times 10^{-3}$ | 0.151  | (0.042) | $2.9 \times 10^{-4}$ | 0.109  | (0.042) | $9.5 \times 10^{-3}$ | 0.126  | (0.042) | $2.8 \times 10^{-3}$ |
| DRB3*03:01 | -0.181 | (0.042) | $1.5 \times 10^{-5}$ | -0.092 | (0.042) | 0.028                | -0.073 | (0.042)  | 0.079                | -0.069 | (0.041) | 0.097                | -0.066 | (0.041) | 0.11                 | -0.069 | (0.041) | 0.096                |
| DRB1*13:02 | -0.178 | (0.042) | $2.0 \times 10^{-5}$ | -0.090 | (0.042) | 0.032                | -0.070 | (0.042)  | 0.091                | -0.066 | (0.041) | 0.11                 | -0.063 | (0.041) | 0.13                 | -0.065 | (0.041) | 0.11                 |
| B*40:01    | 0.150  | (0.036) | $3.7 \times 10^{-5}$ | 0.109  | (0.036) | $2.5 \times 10^{-3}$ | 0.092  | (0.036)  | 0.010                | 0.011  | (0.037) | 0.77                 | 0.024  | (0.037) | 0.52                 | 0.031  | (0.037) | 0.39                 |
| DPA1*01:03 | 0.086  | (0.021) | $6.4 \times 10^{-5}$ | 0.094  | (0.021) | $8.6 \times 10^{-6}$ | 0.090  | (0.021)  | $1.8 \times 10^{-5}$ | 0.079  | (0.021) | $1.6 \times 10^{-4}$ | 0.109  | (0.021) | $3.0 \times 10^{-7}$ | 0.107  | (0.021) | $5.3 \times 10^{-7}$ |
| B*14:02    | -0.205 | (0.051) | $6.5 \times 10^{-5}$ | -0.140 | (0.051) | $5.9 \times 10^{-3}$ | -0.126 | (0.050)  | 0.013                | -0.120 | (0.050) | 0.017                | -0.119 | (0.050) | 0.018                | -0.143 | (0.050) | $4.2 \times 10^{-3}$ |
| DPB1*11:01 | 0.202  | (0.051) | $7.3 \times 10^{-5}$ | 0.082  | (0.051) | 0.11                 | 0.075  | (0.051)  | 0.14                 | 0.101  | (0.051) | 0.047                | 0.027  | (0.052) | 0.60                 | 0.027  | (0.052) | 0.61                 |
| DRB5*99:01 | 0.088  | (0.023) | $1.1 \times 10^{-4}$ | -0.013 | (0.024) | 0.58                 | -0.035 | (0.024)  | 0.14                 | -0.037 | (0.023) | 0.11                 | -0.038 | (0.023) | 0.10                 | -0.021 | (0.024) | 0.38                 |
| DPA1*02:01 | -0.090 | (0.023) | $1.1 \times 10^{-4}$ | -0.098 | (0.023) | $2.2 \times 10^{-5}$ | -0.094 | (0.023)  | $3.7 \times 10^{-5}$ | -0.083 | (0.023) | $2.6 \times 10^{-4}$ | -0.113 | (0.023) | $1.0 \times 10^{-6}$ | -0.111 | (0.023) | $1.4 \times 10^{-6}$ |
| DQB1*06:02 | -0.090 | (0.024) | $1.4 \times 10^{-4}$ | 0.011  | (0.024) | 0.64                 | 0.032  | (0.024)  | 0.19                 | 0.034  | (0.024) | 0.15                 | 0.036  | (0.024) | 0.14                 | 0.016  | (0.024) | 0.50                 |
| DQA1*01:01 | -0.090 | (0.024) | $1.5 \times 10^{-4}$ | 0.005  | (0.025) | 0.84                 | 0.024  | (0.024)  | 0.32                 | 0.026  | (0.024) | 0.29                 | 0.026  | (0.024) | 0.28                 | 0.020  | (0.024) | 0.40                 |
| DRB5*01:01 | -0.086 | (0.023) | $2.1 \times 10^{-4}$ | 0.015  | (0.024) | 0.53                 | 0.036  | (0.0240) | 0.13                 | 0.038  | (0.024) | 0.11                 | 0.039  | (0.024) | 0.099                | 0.020  | (0.024) | 0.40                 |
| A*31:01    | 0.186  | (0.050) | $2.3 \times 10^{-4}$ | 0.116  | (0.050) | 0.020                | 0.117  | (0.050)  | 0.018                | 0.038  | (0.050) | 0.45                 | 0.049  | (0.050) | 0.33                 | 0.070  | (0.050) | 0.16                 |
| C*03:04    | 0.112  | (0.031) | $2.5 \times 10^{-4}$ | 0.051  | (0.030) | 0.091                | 0.043  | (0.030)  | 0.15                 | -0.010 | (0.031) | 0.76                 | 0.018  | (0.031) | 0.56                 | 0.023  | (0.031) | 0.46                 |

**Supplementary Table 11:** Associations from conditional analyses of classical HLA alleles associated with EBV EBNA antigen response at the Bonferroni-corrected threshold of  $P < 5 \times 10^{-4}$ . Independent alleles identified at each round are in bold.

| Allele            | Unconditional (Round 0) |                |                                         | Conditional Round 1 |                |                                         | Conditional Round 2 |                |                                         | Conditional Round 3 |                |                                         | Conditional Round 4 |                |                                         | Conditional Round 5 |         |                      |
|-------------------|-------------------------|----------------|-----------------------------------------|---------------------|----------------|-----------------------------------------|---------------------|----------------|-----------------------------------------|---------------------|----------------|-----------------------------------------|---------------------|----------------|-----------------------------------------|---------------------|---------|----------------------|
|                   | Beta                    | SE             | P                                       | Beta                | SE             | $P_{\text{cond}}$                       | Beta                | SE      | $P_{\text{cond}}$    |
| <b>DRB5*99:01</b> | <b>-0.255</b>           | <b>(0.022)</b> | <b><math>8.7 \times 10^{-30}</math></b> | -                   | -              | -                                       | -                   | -              | -                                       | -                   | -              | -                                       | -                   | -              | -                                       | -                   | -       | -                    |
| <b>DRB3*02:02</b> | 0.224                   | (0.024)        | $2.2 \times 10^{-20}$                   | <b>0.276</b>        | <b>(0.024)</b> | <b><math>6.8 \times 10^{-30}</math></b> | -                   | -              | -                                       | -                   | -              | -                                       | -                   | -              | -                                       | -                   | -       | -                    |
| <b>DQB1*02:01</b> | -0.217                  | (0.023)        | $2.4 \times 10^{-20}$                   | -0.174              | (0.024)        | $2.0 \times 10^{-13}$                   | <b>-0.164</b>       | <b>(0.023)</b> | <b><math>3.6 \times 10^{-12}</math></b> | -                   | -              | -                                       | -                   | -              | -                                       | -                   | -       | -                    |
| <b>DRB4*99:01</b> | 0.198                   | (0.018)        | $6.6 \times 10^{-29}$                   | 0.150               | (0.018)        | $3.8 \times 10^{-16}$                   | 0.092               | (0.019)        | $2.1 \times 10^{-6}$                    | <b>0.176</b>        | <b>(0.021)</b> | <b><math>8.3 \times 10^{-17}</math></b> | -                   | -              | -                                       | -                   | -       | -                    |
| <b>DPB1*03:01</b> | -0.215                  | (0.030)        | $5.7 \times 10^{-13}$                   | -0.199              | (0.030)        | $1.8 \times 10^{-11}$                   | -0.201              | (0.029)        | $6.9 \times 10^{-12}$                   | -0.206              | (0.029)        | $1.7 \times 10^{-12}$                   | <b>-0.220</b>       | <b>(0.029)</b> | <b><math>4.7 \times 10^{-14}</math></b> | -                   | -       | -                    |
| DRB1*15:01        | 0.253                   | (0.023)        | $7.8 \times 10^{-28}$                   | 0.025               | (0.079)        | 0.75                                    | 0.052               | (0.079)        | 0.51                                    | 0.048               | (0.078)        | 0.54                                    | 0.027               | (0.078)        | 0.73                                    | 0.025               | (0.078) | 0.75                 |
| DQA1*01:02        | 0.221                   | (0.020)        | $4.1 \times 10^{-27}$                   | 0.085               | (0.039)        | 0.027                                   | 0.138               | (0.038)        | $3.3 \times 10^{-4}$                    | 0.110               | (0.039)        | $4.5 \times 10^{-3}$                    | 0.018               | (0.040)        | 0.65                                    | 0.046               | (0.040) | 0.26                 |
| DRB5*01:01        | 0.248                   | (0.023)        | $5.2 \times 10^{-27}$                   | -0.049              | (0.085)        | 0.57                                    | -0.016              | (0.085)        | 0.85                                    | -0.016              | (0.084)        | 0.85                                    | -0.036              | (0.084)        | 0.66                                    | -0.036              | (0.084) | 0.67                 |
| DQB1*06:02        | 0.244                   | (0.023)        | $8.5 \times 10^{-26}$                   | -0.024              | (0.067)        | 0.72                                    | 0.006               | (0.066)        | 0.92                                    | 0.001               | (0.066)        | 0.99                                    | -0.028              | (0.066)        | 0.67                                    | -0.037              | (0.065) | 0.57                 |
| DQA1*02:01        | -0.231                  | (0.024)        | $3.1 \times 10^{-21}$                   | -0.188              | (0.025)        | $1.9 \times 10^{-14}$                   | -0.142              | (0.025)        | $9.1 \times 10^{-9}$                    | -0.190              | (0.025)        | $6.3 \times 10^{-14}$                   | -0.113              | (0.029)        | $9.2 \times 10^{-5}$                    | -0.117              | (0.029) | $4.9 \times 10^{-5}$ |
| DRB1*07:01        | -0.230                  | (0.024)        | $3.8 \times 10^{-21}$                   | -0.188              | (0.024)        | $1.9 \times 10^{-14}$                   | -0.142              | (0.025)        | $9.8 \times 10^{-9}$                    | -0.189              | (0.025)        | $6.4 \times 10^{-14}$                   | -0.113              | (0.029)        | $9.1 \times 10^{-5}$                    | -0.117              | (0.029) | $4.7 \times 10^{-5}$ |
| DRB1*03:01        | -0.211                  | (0.023)        | $3.4 \times 10^{-19}$                   | -0.168              | (0.024)        | $1.4 \times 10^{-12}$                   | -0.157              | (0.024)        | $2.8 \times 10^{-11}$                   | 0.119               | (0.127)        | 0.35                                    | 0.003               | (0.127)        | 0.98                                    | -0.005              | (0.126) | 0.97                 |
| DRB4*01:03        | -0.171                  | (0.020)        | $5.0 \times 10^{-18}$                   | -0.123              | (0.020)        | $1.4 \times 10^{-9}$                    | -0.067              | (0.021)        | $1.3 \times 10^{-3}$                    | -0.125              | (0.022)        | $1.0 \times 10^{-8}$                    | 0.029               | (0.033)        | 0.38                                    | 0.035               | (0.033) | 0.29                 |
| DRB1*12:01        | 0.578                   | (0.071)        | $3.5 \times 10^{-16}$                   | 0.617               | (0.070)        | $1.6 \times 10^{-18}$                   | 0.422               | (0.073)        | $7.1 \times 10^{-9}$                    | 0.393               | (0.073)        | $6.9 \times 10^{-8}$                    | 0.365               | (0.072)        | $4.8 \times 10^{-7}$                    | 0.360               | (0.072) | $6.4 \times 10^{-7}$ |
| DQB1*02:02        | -0.242                  | (0.031)        | $1.5 \times 10^{-14}$                   | -0.194              | (0.032)        | $7.5 \times 10^{-10}$                   | -0.144              | (0.032)        | $5.1 \times 10^{-6}$                    | -0.196              | (0.032)        | $1.1 \times 10^{-9}$                    | -0.105              | (0.035)        | $2.6 \times 10^{-3}$                    | -0.106              | (0.035) | $2.4 \times 10^{-3}$ |
| B*07:02           | 0.162                   | (0.023)        | $5.4 \times 10^{-12}$                   | 0.038               | (0.027)        | 0.16                                    | 0.038               | (0.027)        | 0.16                                    | 0.027               | (0.027)        | 0.31                                    | 0.020               | (0.027)        | 0.46                                    | 0.023               | (0.026) | 0.38                 |
| C*07:02           | 0.144                   | (0.023)        | $2.1 \times 10^{-10}$                   | 0.030               | (0.026)        | 0.24                                    | 0.031               | (0.025)        | 0.23                                    | 0.020               | (0.025)        | 0.43                                    | 0.007               | (0.025)        | 0.77                                    | 0.012               | (0.025) | 0.62                 |
| DPB1*04:02        | 0.165                   | (0.027)        | $1.3 \times 10^{-9}$                    | 0.187               | (0.027)        | $4.2 \times 10^{-12}$                   | 0.167               | (0.027)        | $4.4 \times 10^{-10}$                   | 0.159               | (0.027)        | $2.7 \times 10^{-9}$                    | 0.140               | (0.027)        | $1.7 \times 10^{-7}$                    | 0.116               | (0.027) | $1.6 \times 10^{-5}$ |
| DRB1*11:01        | 0.264                   | (0.046)        | $8.1 \times 10^{-9}$                    | 0.312               | (0.045)        | $6.9 \times 10^{-12}$                   | 0.082               | (0.052)        | 0.11                                    | 0.051               | (0.052)        | 0.32                                    | 0.034               | (0.051)        | 0.51                                    | 0.024               | (0.051) | 0.64                 |
| B*08:01           | -0.136                  | (0.024)        | $1.5 \times 10^{-8}$                    | -0.105              | (0.024)        | $1.1 \times 10^{-5}$                    | -0.066              | (0.024)        | $6.3 \times 10^{-3}$                    | 0.112               | (0.034)        | $1.1 \times 10^{-3}$                    | 0.082               | (0.034)        | 0.017                                   | 0.076               | (0.034) | 0.027                |
| DQA1*03:01        | -0.117                  | (0.021)        | $4.5 \times 10^{-8}$                    | -0.067              | (0.022)        | $1.9 \times 10^{-3}$                    | -0.010              | (0.022)        | 0.65                                    | -0.054              | (0.023)        | 0.018                                   | 0.084               | (0.028)        | $2.6 \times 10^{-3}$                    | 0.085               | (0.028) | $2.3 \times 10^{-3}$ |
| A*03:01           | 0.130                   | (0.024)        | $4.6 \times 10^{-8}$                    | 0.092               | (0.024)        | $1.1 \times 10^{-4}$                    | 0.100               | (0.024)        | $2.5 \times 10^{-5}$                    | 0.085               | (0.024)        | $3.1 \times 10^{-4}$                    | 0.073               | (0.024)        | $2.1 \times 10^{-3}$                    | 0.075               | (0.023) | $1.4 \times 10^{-3}$ |
| DRB4*01:01        | -0.168                  | (0.032)        | $9.4 \times 10^{-8}$                    | -0.126              | (0.032)        | $6.9 \times 10^{-5}$                    | -0.078              | (0.032)        | 0.014                                   | -0.117              | (0.032)        | $2.4 \times 10^{-4}$                    | -0.025              | (0.034)        | 0.46                                    | -0.032              | (0.034) | 0.35                 |
| DRB1*14:01        | 0.291                   | (0.060)        | $1.2 \times 10^{-6}$                    | 0.315               | (0.059)        | $1.2 \times 10^{-7}$                    | 0.120               | (0.062)        | 0.053                                   | 0.097               | (0.062)        | 0.118                                   | 0.075               | (0.062)        | 0.22                                    | 0.090               | (0.061) | 0.14                 |
| DRB3*01:01        | -0.107                  | (0.022)        | $1.3 \times 10^{-6}$                    | -0.060              | (0.022)        | $7.1 \times 10^{-3}$                    | -0.003              | (0.023)        | 0.90                                    | 0.279               | (0.035)        | $1.5 \times 10^{-15}$                   | 0.197               | (0.038)        | $1.6 \times 10^{-7}$                    | 0.187               | (0.037) | $5.8 \times 10^{-7}$ |
| DQB1*06:03        | 0.167                   | (0.036)        | $4.3 \times 10^{-6}$                    | 0.207               | (0.036)        | $9.0 \times 10^{-9}$                    | 0.140               | (0.036)        | $1.1 \times 10^{-4}$                    | 0.112               | (0.036)        | $2.1 \times 10^{-3}$                    | 0.047               | (0.037)        | 0.21                                    | 0.048               | (0.037) | 0.19                 |



|            |        |         |                      |        |         |                       |        |         |                      |        |         |                       |        |         |                      |        |         |                      |
|------------|--------|---------|----------------------|--------|---------|-----------------------|--------|---------|----------------------|--------|---------|-----------------------|--------|---------|----------------------|--------|---------|----------------------|
| DRB1*04:01 | -0.122 | (0.027) | $9.3 \times 10^{-6}$ | -0.074 | (0.028) | $7.4 \times 10^{-3}$  | -0.022 | (0.028) | 0.44                 | -0.061 | (0.028) | 0.031                 | 0.045  | (0.031) | 0.15                 | 0.035  | (0.031) | 0.26                 |
| DQB1*05:03 | 0.243  | (0.055) | $1.1 \times 10^{-5}$ | 0.266  | (0.055) | $1.3 \times 10^{-6}$  | 0.078  | (0.057) | 0.17                 | 0.053  | (0.057) | 0.35                  | 0.034  | (0.057) | 0.55                 | 0.047  | (0.057) | 0.41                 |
| C*07:01    | -0.094 | (0.022) | $1.7 \times 10^{-5}$ | -0.065 | (0.022) | $3.0 \times 10^{-3}$  | -0.039 | (0.022) | 0.07                 | 0.086  | (0.027) | $1.7 \times 10^{-3}$  | 0.066  | (0.027) | 0.015                | 0.064  | (0.027) | 0.020                |
| DPB1*05:01 | 0.243  | (0.058) | $2.9 \times 10^{-5}$ | 0.226  | (0.057) | $8.6 \times 10^{-5}$  | 0.219  | (0.057) | $1.2 \times 10^{-4}$ | 0.201  | (0.057) | $4.2 \times 10^{-4}$  | 0.169  | (0.057) | $2.8 \times 10^{-3}$ | 0.148  | (0.057) | $8.8 \times 10^{-3}$ |
| DRB1*13:01 | 0.150  | (0.037) | $4.3 \times 10^{-5}$ | 0.198  | (0.036) | $5.6 \times 10^{-8}$  | 0.133  | (0.037) | $3.0 \times 10^{-4}$ | 0.104  | (0.037) | $4.7 \times 10^{-3}$  | 0.037  | (0.038) | 0.33                 | 0.038  | (0.038) | 0.31                 |
| B*51:01    | 0.183  | (0.045) | $4.6 \times 10^{-5}$ | 0.194  | (0.044) | $1.2 \times 10^{-5}$  | 0.164  | (0.044) | $2.0 \times 10^{-4}$ | 0.144  | (0.044) | $1.1 \times 10^{-3}$  | 0.135  | (0.044) | $2.1 \times 10^{-3}$ | 0.144  | (0.044) | $1.0 \times 10^{-3}$ |
| B*57:01    | -0.165 | (0.044) | $1.7 \times 10^{-4}$ | -0.133 | (0.044) | $2.3 \times 10^{-3}$  | -0.110 | (0.043) | 0.011                | -0.132 | (0.043) | $2.4 \times 10^{-3}$  | -0.081 | (0.044) | 0.064                | -0.085 | (0.043) | 0.050                |
| DRB1*11:04 | 0.261  | (0.074) | $4.2 \times 10^{-4}$ | 0.311  | (0.073) | $2.3 \times 10^{-5}$  | 0.068  | (0.076) | 0.37                 | 0.046  | (0.076) | 0.55                  | 0.025  | (0.076) | 0.74                 | 0.003  | (0.075) | 0.96                 |
| DRB3*99:01 | -0.061 | (0.018) | $4.8 \times 10^{-4}$ | -0.135 | (0.018) | $1.3 \times 10^{-13}$ | -0.037 | (0.021) | 0.08                 | -0.230 | (0.028) | $1.2 \times 10^{-16}$ | -0.151 | (0.032) | $2.8 \times 10^{-6}$ | -0.158 | (0.032) | $8.9 \times 10^{-7}$ |

**Supplementary Table 12:** Associations from conditional analyses of classical HLA alleles associated with EBV p18 antigen response at the Bonferroni-corrected threshold of  $P < 5 \times 10^{-4}$ . Independent alleles identified at each round are in bold.

| Allele            | Unconditional (Round 0) |                |                                         | Conditional Round 1 |                |                                         | Conditional Round 2 |         |                      |
|-------------------|-------------------------|----------------|-----------------------------------------|---------------------|----------------|-----------------------------------------|---------------------|---------|----------------------|
|                   | Beta                    | (SE)           | P                                       | Beta                | (SE)           | $P_{\text{cond}}$                       | Beta                | (SE)    | $P_{\text{cond}}$    |
| <b>DRB5*99:01</b> | <b>-0.210</b>           | <b>(0.021)</b> | <b><math>1.7 \times 10^{-22}</math></b> | -                   | -              | -                                       | -                   | -       | -                    |
| <b>DRB1*04:04</b> | 0.319                   | (0.041)        | $4.7 \times 10^{-15}$                   | <b>0.357</b>        | <b>(0.040)</b> | <b><math>1.3 \times 10^{-18}</math></b> | -                   | -       | -                    |
| DRB5*01:01        | 0.211                   | (0.022)        | $1.4 \times 10^{-21}$                   | 0.041               | (0.083)        | 0.62                                    | 0.042               | (0.082) | 0.61                 |
| DRB1*15:01        | 0.209                   | (0.022)        | $4.2 \times 10^{-21}$                   | 0.022               | (0.077)        | 0.78                                    | 0.026               | (0.077) | 0.73                 |
| DQA1*01:02        | 0.181                   | (0.020)        | $2.7 \times 10^{-20}$                   | 0.067               | (0.037)        | 0.069                                   | 0.085               | (0.037) | 0.020                |
| C*07:02           | 0.196                   | (0.022)        | $9.7 \times 10^{-20}$                   | 0.125               | (0.024)        | $2.9 \times 10^{-7}$                    | 0.117               | (0.024) | $1.4 \times 10^{-6}$ |
| DQB1*06:02        | 0.199                   | (0.022)        | $4.7 \times 10^{-19}$                   | -0.043              | (0.064)        | 0.50                                    | -0.039              | (0.064) | 0.54                 |
| B*07:02           | 0.195                   | (0.022)        | $2.2 \times 10^{-18}$                   | 0.115               | (0.026)        | $8.1 \times 10^{-6}$                    | 0.106               | (0.026) | $3.3 \times 10^{-5}$ |
| B*08:01           | -0.119                  | (0.022)        | $8.3 \times 10^{-8}$                    | -0.094              | (0.022)        | $2.4 \times 10^{-5}$                    | -0.079              | (0.022) | $3.6 \times 10^{-4}$ |
| DPB1*03:01        | -0.143                  | (0.028)        | $2.1 \times 10^{-7}$                    | -0.129              | (0.027)        | $2.9 \times 10^{-6}$                    | -0.126              | (0.027) | $4.0 \times 10^{-6}$ |
| DQB1*02:01        | -0.105                  | (0.022)        | $1.3 \times 10^{-6}$                    | -0.069              | (0.022)        | $1.7 \times 10^{-3}$                    | -0.047              | (0.022) | 0.031                |
| DRB1*03:01        | -0.102                  | (0.022)        | $2.2 \times 10^{-6}$                    | -0.067              | (0.022)        | $2.2 \times 10^{-3}$                    | -0.045              | (0.022) | 0.040                |
| DPB1*04:01        | 0.076                   | (0.016)        | $2.5 \times 10^{-6}$                    | 0.046               | (0.016)        | $5.0 \times 10^{-3}$                    | 0.052               | (0.016) | $1.5 \times 10^{-3}$ |
| C*07:01           | -0.093                  | (0.020)        | $4.0 \times 10^{-6}$                    | -0.070              | (0.020)        | $5.8 \times 10^{-4}$                    | -0.056              | (0.020) | $5.7 \times 10^{-3}$ |
| DRB3*99:01        | 0.075                   | (0.016)        | $5.5 \times 10^{-6}$                    | 0.031               | (0.017)        | 0.074                                   | 0.001               | (0.017) | 0.95                 |
| DQA1*05:01        | -0.084                  | (0.019)        | $6.0 \times 10^{-6}$                    | -0.045              | (0.019)        | 0.017                                   | -0.020              | (0.019) | 0.29                 |
| B*14:02           | -0.212                  | (0.048)        | $8.8 \times 10^{-6}$                    | -0.199              | (0.047)        | $2.7 \times 10^{-5}$                    | -0.183              | (0.047) | $1.1 \times 10^{-4}$ |
| C*08:02           | -0.181                  | (0.041)        | $9.2 \times 10^{-6}$                    | -0.165              | (0.041)        | $4.8 \times 10^{-5}$                    | -0.149              | (0.040) | $2.2 \times 10^{-4}$ |
| DPB1*06:01        | 0.379                   | (0.089)        | $2.0 \times 10^{-5}$                    | 0.424               | (0.088)        | $1.7 \times 10^{-6}$                    | 0.077               | (0.100) | 0.44                 |
| DQA1*02:01        | -0.096                  | (0.023)        | $2.5 \times 10^{-5}$                    | -0.059              | (0.023)        | 0.010                                   | -0.038              | (0.023) | 0.099                |
| DRB1*07:01        | -0.095                  | (0.023)        | $3.1 \times 10^{-5}$                    | -0.058              | (0.023)        | 0.011                                   | -0.037              | (0.023) | 0.11                 |
| C*04:01           | -0.117                  | (0.028)        | $4.1 \times 10^{-5}$                    | -0.093              | (0.028)        | $1.1 \times 10^{-3}$                    | -0.081              | (0.028) | $4.0 \times 10^{-3}$ |
| C*03:03           | -0.139                  | (0.034)        | $4.2 \times 10^{-5}$                    | -0.130              | (0.034)        | $1.1 \times 10^{-4}$                    | -0.142              | (0.034) | $2.2 \times 10^{-5}$ |
| DRB3*01:01        | -0.083                  | (0.021)        | $4.9 \times 10^{-5}$                    | -0.046              | (0.021)        | 0.026                                   | -0.025              | (0.021) | 0.23                 |
| DPA1*02:01        | -0.090                  | (0.022)        | $5.4 \times 10^{-5}$                    | -0.066              | (0.022)        | $3.2 \times 10^{-3}$                    | -0.054              | (0.022) | 0.015                |
| DQB1*02:02        | -0.112                  | (0.029)        | $1.5 \times 10^{-4}$                    | -0.072              | (0.030)        | 0.015                                   | -0.047              | (0.030) | 0.11                 |
| DPB1*01:01        | -0.124                  | (0.034)        | $2.3 \times 10^{-4}$                    | -0.097              | (0.033)        | $3.8 \times 10^{-3}$                    | -0.084              | (0.033) | 0.012                |
| B*35:01           | -0.139                  | (0.038)        | $2.5 \times 10^{-4}$                    | -0.109              | (0.038)        | $4.1 \times 10^{-3}$                    | -0.097              | (0.038) | 0.010                |
| B*51:01           | 0.153                   | (0.042)        | $3.0 \times 10^{-4}$                    | 0.164               | (0.042)        | $1.0 \times 10^{-4}$                    | 0.152               | (0.042) | $3.0 \times 10^{-4}$ |
| B*15:01           | -0.116                  | (0.033)        | $4.1 \times 10^{-4}$                    | -0.102              | (0.033)        | $1.8 \times 10^{-3}$                    | -0.108              | (0.032) | $8.4 \times 10^{-4}$ |

**Supplementary Table 13:** Associations from conditional analyses of classical HLA alleles associated with antigen response at the Bonferroni-corrected threshold of  $P < 5 \times 10^{-4}$ . Independent alleles identified at each round are in bold. Results are presented for antigens with a single conditionally independent classical allele.

| Antigen  | Allele            | Unconditional (Round 0) |                      |                                         | Conditional Round 1 |                      |                      |
|----------|-------------------|-------------------------|----------------------|-----------------------------------------|---------------------|----------------------|----------------------|
|          |                   | Beta                    | (SE)                 | P                                       | Beta                | SE                   | $P_{\text{cond}}$    |
| CMV pp52 | <b>DRB1*01:03</b> | <b>-0.538</b>           | <b>(0.075)</b>       | <b><math>9.4 \times 10^{-13}</math></b> | -                   | -                    | -                    |
|          | C*07:01           | -0.091                  | (0.025)              | $2.7 \times 10^{-4}$                    | -0.099              | (0.025)              | $6.4 \times 10^{-5}$ |
|          | DPB1*03:01        | 0.121                   | (0.034)              | $3.7 \times 10^{-4}$                    | 0.112               | (0.034)              | $8.9 \times 10^{-4}$ |
| EBV EA-D | <b>DQB1*02:01</b> | <b>-0.154</b>           | <b>(0.024)</b>       | <b><math>8.4 \times 10^{-11}</math></b> | -                   | -                    | -                    |
|          | DRB1*03:01        | -0.147                  | (0.024)              | $5.5 \times 10^{-10}$                   | 0.109               | (0.124)              | 0.38                 |
|          | B*08:01           | -0.144                  | (0.024)              | $2.7 \times 10^{-9}$                    | -0.064              | (0.035)              | 0.068                |
|          | DRB1*09:01        | 0.407                   | (0.073)              | $3.2 \times 10^{-8}$                    | 0.383               | (0.073)              | $1.9 \times 10^{-7}$ |
|          | DQA1*03:01        | 0.110                   | (0.021)              | $1.1 \times 10^{-7}$                    | 0.085               | (0.021)              | $6.6 \times 10^{-5}$ |
|          | DRB4*99:01        | -0.088                  | (0.018)              | $5.8 \times 10^{-7}$                    | -0.058              | (0.018)              | $1.5 \times 10^{-3}$ |
|          | C*07:01           | -0.109                  | (0.022)              | $7.7 \times 10^{-7}$                    | -0.032              | (0.028)              | 0.25                 |
|          | DRB3*99:01        | 0.087                   | (0.018)              | $9.0 \times 10^{-7}$                    | 0.033               | (0.021)              | 0.12                 |
|          | A*03:01           | 0.114                   | (0.024)              | $2.4 \times 10^{-6}$                    | 0.098               | (0.024)              | $5.6 \times 10^{-5}$ |
|          | DRB4*01:03        | 0.085                   | (0.019)              | $1.1 \times 10^{-5}$                    | 0.057               | (0.020)              | $4.4 \times 10^{-3}$ |
|          | DQA1*05:01        | -0.088                  | (0.020)              | $1.4 \times 10^{-5}$                    | 0.026               | (0.031)              | 0.40                 |
|          | DQB1*03:03        | 0.164                   | (0.038)              | $1.4 \times 10^{-5}$                    | 0.142               | (0.038)              | $1.9 \times 10^{-4}$ |
|          | DRB3*01:01        | -0.096                  | (0.022)              | $2.0 \times 10^{-5}$                    | 0.035               | (0.034)              | 0.32                 |
|          | DQB1*03:01        | 0.094                   | (0.022)              | $2.1 \times 10^{-5}$                    | 0.069               | (0.023)              | $2.2 \times 10^{-3}$ |
|          | DPB1*02:01        | -0.103                  | (0.028)              | $1.9 \times 10^{-4}$                    | -0.110              | (0.028)              | $6.3 \times 10^{-5}$ |
| A*01:01  | -0.078            | (0.021)                 | $2.6 \times 10^{-4}$ | -0.021                                  | (0.024)             | 0.38                 |                      |
| A*02:01  | -0.068            | (0.019)                 | $3.7 \times 10^{-4}$ | -0.086                                  | (0.019)             | $7.8 \times 10^{-6}$ |                      |
| HHV7     | <b>DQB1*05:01</b> | <b>-0.139</b>           | <b>(0.025)</b>       | <b><math>2.8 \times 10^{-8}</math></b>  | -                   | -                    | -                    |
|          | DQA1*01:01        | -0.125                  | (0.023)              | $8.2 \times 10^{-8}$                    | -0.045              | (0.053)              | 0.40                 |
|          | DRB1*01:01        | -0.146                  | (0.028)              | $2.3 \times 10^{-7}$                    | -0.049              | (0.052)              | 0.35                 |
|          | DRB4*99:01        | -0.085                  | (0.017)              | $4.5 \times 10^{-7}$                    | -0.066              | (0.017)              | $1.6 \times 10^{-4}$ |
|          | DPB1*04:02        | -0.133                  | (0.026)              | $4.8 \times 10^{-7}$                    | -0.115              | (0.027)              | $1.5 \times 10^{-5}$ |
|          | DRB1*04:01        | 0.128                   | (0.026)              | $7.3 \times 10^{-7}$                    | 0.110               | (0.026)              | $2.3 \times 10^{-5}$ |
|          | DRB4*01:03        | 0.077                   | (0.019)              | $3.0 \times 10^{-5}$                    | 0.058               | (0.019)              | $2.0 \times 10^{-3}$ |
| HSV1     | <b>DQB1*02:01</b> | <b>0.145</b>            | <b>(0.026)</b>       | <b><math>2.1 \times 10^{-8}</math></b>  | -                   | -                    | -                    |
|          | DRB1*03:01        | 0.140                   | (0.026)              | $6.3 \times 10^{-8}$                    | -0.090              | (0.147)              | 0.54                 |
|          | DQA1*01:02        | -0.110                  | (0.024)              | $3.1 \times 10^{-6}$                    | -0.086              | (0.024)              | $3.7 \times 10^{-4}$ |
|          | DQB1*06:02        | -0.115                  | (0.027)              | $1.7 \times 10^{-5}$                    | -0.091              | (0.027)              | $7.9 \times 10^{-4}$ |
|          | DRB5*99:01        | 0.110                   | (0.026)              | $2.3 \times 10^{-5}$                    | 0.086               | (0.026)              | $1.2 \times 10^{-3}$ |
|          | DRB1*15:01        | -0.110                  | (0.027)              | $3.6 \times 10^{-5}$                    | -0.086              | (0.027)              | $1.5 \times 10^{-3}$ |
|          | DRB3*01:01        | 0.102                   | (0.025)              | $3.6 \times 10^{-5}$                    | -0.011              | (0.038)              | 0.78                 |
|          | DRB5*01:01        | -0.109                  | (0.026)              | $3.7 \times 10^{-5}$                    | -0.085              | (0.027)              | $1.5 \times 10^{-3}$ |

|     |                   |              |                |                                         |        |         |                      |
|-----|-------------------|--------------|----------------|-----------------------------------------|--------|---------|----------------------|
|     | B*08:01           | 0.106        | (0.026)        | $6.2 \times 10^{-5}$                    | -0.003 | (0.038) | 0.93                 |
| VZV | <b>DRB1*03:01</b> | <b>0.236</b> | <b>(0.022)</b> | <b><math>7.3 \times 10^{-26}</math></b> | -      | -       | -                    |
|     | DQB1*02:01        | 0.236        | (0.022)        | $7.5 \times 10^{-26}$                   | 0.117  | (0.126) | 0.35                 |
|     | B*08:01           | 0.238        | (0.023)        | $4.7 \times 10^{-25}$                   | 0.131  | (0.034) | $1.2 \times 10^{-4}$ |
|     | DRB3*01:01        | 0.197        | (0.021)        | $3.7 \times 10^{-20}$                   | 0.053  | (0.034) | 0.12                 |
|     | C*07:01           | 0.194        | (0.021)        | $4.6 \times 10^{-20}$                   | 0.088  | (0.027) | $1.4 \times 10^{-3}$ |
|     | A*01:01           | 0.181        | (0.021)        | $1.9 \times 10^{-18}$                   | 0.104  | (0.023) | $6.9 \times 10^{-6}$ |
|     | DQA1*05:01        | 0.153        | (0.019)        | $2.8 \times 10^{-15}$                   | -0.013 | (0.031) | 0.67                 |
|     | DRB3*99:01        | -0.114       | (0.017)        | $3.2 \times 10^{-11}$                   | -0.013 | (0.021) | 0.54                 |
|     | DRB5*99:01        | 0.136        | (0.023)        | $2.3 \times 10^{-9}$                    | 0.096  | (0.023) | $3.1 \times 10^{-5}$ |
|     | DRB5*01:01        | -0.135       | (0.023)        | $7.1 \times 10^{-9}$                    | -0.095 | (0.023) | $5.1 \times 10^{-5}$ |
|     | DQB1*06:02        | -0.133       | (0.023)        | $1.6 \times 10^{-8}$                    | -0.095 | (0.024) | $5.4 \times 10^{-5}$ |
|     | DRB1*15:01        | -0.132       | (0.023)        | $1.8 \times 10^{-8}$                    | -0.092 | (0.024) | $1.0 \times 10^{-4}$ |
|     | A*02:01           | -0.103       | (0.019)        | $4.1 \times 10^{-8}$                    | -0.079 | (0.019) | $3.0 \times 10^{-5}$ |
|     | DQA1*01:02        | -0.099       | (0.021)        | $1.4 \times 10^{-6}$                    | -0.057 | (0.021) | $6.7 \times 10^{-3}$ |
|     | DQB1*03:01        | -0.089       | (0.022)        | $4.9 \times 10^{-5}$                    | -0.046 | (0.022) | 0.040                |
|     | B*44:02           | -0.108       | (0.027)        | $5.8 \times 10^{-5}$                    | -0.074 | (0.027) | $5.7 \times 10^{-3}$ |
|     | <b>DRB5*99:01</b> | <b>0.305</b> | <b>(0.032)</b> | <b><math>1.2 \times 10^{-21}</math></b> | -      | -       | -                    |
| JCV | DRB5*01:01        | -0.309       | (0.033)        | $4.8 \times 10^{-21}$                   | -0.097 | (0.120) | 0.42                 |
|     | DQB1*06:02        | -0.310       | (0.033)        | $7.2 \times 10^{-21}$                   | -0.116 | (0.093) | 0.21                 |
|     | DRB1*15:01        | -0.309       | (0.033)        | $9.0 \times 10^{-21}$                   | -0.082 | (0.112) | 0.46                 |
|     | DQA1*01:02        | -0.218       | (0.028)        | $8.5 \times 10^{-15}$                   | 0.006  | (0.049) | 0.89                 |
|     | DQB1*03:01        | 0.133        | (0.027)        | $1.1 \times 10^{-6}$                    | 0.086  | (0.028) | $1.7 \times 10^{-3}$ |
|     | B*07:02           | -0.132       | (0.031)        | $2.8 \times 10^{-5}$                    | 0.012  | (0.035) | 0.73                 |
|     | DRB4*99:01        | -0.087       | (0.022)        | $5.1 \times 10^{-5}$                    | -0.033 | (0.022) | 0.14                 |
|     | DPB1*04:01        | -0.087       | (0.021)        | $5.6 \times 10^{-5}$                    | -0.051 | (0.022) | 0.017                |
|     | DRB4*01:03        | 0.093        | (0.024)        | $9.4 \times 10^{-5}$                    | 0.044  | (0.024) | 0.068                |
|     | C*07:02           | -0.115       | (0.030)        | $1.5 \times 10^{-4}$                    | 0.013  | (0.033) | 0.71                 |
|     | DRB3*99:01        | -0.082       | (0.022)        | $1.6 \times 10^{-4}$                    | -0.029 | (0.022) | 0.19                 |
|     | DQA1*03:01        | 0.096        | (0.026)        | $2.0 \times 10^{-4}$                    | 0.050  | (0.026) | 0.057                |
|     | DRB1*04:01        | 0.123        | (0.033)        | $2.1 \times 10^{-4}$                    | 0.079  | (0.033) | 0.018                |

**Supplementary Table 14:** Associations from conditional analyses of classical HLA alleles associated with MCV antigen response at the Bonferroni-corrected threshold of  $P < 5 \times 10^{-4}$ . Independent alleles identified at each round are in bold.

| Allele            | Unconditional (Round 0) |                |                                         | Conditional Round 1 |                |                                         | Conditional Round 2 |                |                                         | Conditional Round 3 |                |                                         | Conditional Round 4 |         |                      |
|-------------------|-------------------------|----------------|-----------------------------------------|---------------------|----------------|-----------------------------------------|---------------------|----------------|-----------------------------------------|---------------------|----------------|-----------------------------------------|---------------------|---------|----------------------|
|                   | Beta                    | (SE)           | P                                       | Beta                | (SE)           | $P_{\text{cond}}$                       | Beta                | (SE)           | $P_{\text{cond}}$                       | Beta                | (SE)           | $P_{\text{cond}}$                       | Beta                | (SE)    | $P_{\text{cond}}$    |
| <b>DQA1*01:01</b> | <b>0.215</b>            | <b>(0.027)</b> | <b><math>1.1 \times 10^{-15}</math></b> | -                   | -              | -                                       | -                   | -              | -                                       | -                   | -              | -                                       | -                   | -       | -                    |
| <b>DRB1*04:04</b> | -0.390                  | (0.054)        | $8.6 \times 10^{-13}$                   | <b>-0.362</b>       | <b>(0.054)</b> | <b><math>3.0 \times 10^{-11}</math></b> | -                   | -              | -                                       | -                   | -              | -                                       | -                   | -       | -                    |
| <b>A*29:02</b>    | -0.359                  | (0.052)        | $4.5 \times 10^{-12}$                   | -0.342              | (0.052)        | $3.7 \times 10^{-11}$                   | <b>-0.350</b>       | <b>(0.051)</b> | <b><math>1.0 \times 10^{-11}</math></b> | -                   | -              | -                                       | -                   | -       | -                    |
| <b>DRB1*15:01</b> | -0.213                  | (0.029)        | $2.1 \times 10^{-13}$                   | -0.178              | (0.029)        | $1.1 \times 10^{-9}$                    | -0.199              | (0.029)        | $1.0 \times 10^{-11}$                   | <b>-0.203</b>       | <b>(0.029)</b> | <b><math>3.7 \times 10^{-12}</math></b> | -                   | -       | -                    |
| DQB1*05:01        | 0.220                   | (0.029)        | $1.6 \times 10^{-14}$                   | 0.070               | (0.066)        | 0.29                                    | 0.070               | (0.066)        | 0.29                                    | 0.070               | (0.065)        | 0.29                                    | 0.066               | (0.065) | 0.31                 |
| DQB1*06:02        | -0.213                  | (0.029)        | $2.5 \times 10^{-13}$                   | -0.179              | (0.029)        | $1.2 \times 10^{-9}$                    | -0.199              | (0.029)        | $1.2 \times 10^{-11}$                   | -0.204              | (0.029)        | $3.7 \times 10^{-12}$                   | -0.103              | (0.124) | 0.41                 |
| DRB5*01:01        | -0.210                  | (0.029)        | $3.7 \times 10^{-13}$                   | -0.176              | (0.029)        | $1.8 \times 10^{-9}$                    | -0.196              | (0.029)        | $1.9 \times 10^{-11}$                   | -0.200              | (0.029)        | $7.2 \times 10^{-12}$                   | 0.067               | (0.227) | 0.77                 |
| DRB1*01:01        | 0.216                   | (0.032)        | $1.3 \times 10^{-11}$                   | 0.046               | (0.050)        | 0.35                                    | 0.044               | (0.050)        | 0.38                                    | 0.044               | (0.050)        | 0.37                                    | 0.041               | (0.049) | 0.41                 |
| DRB5*99:01        | 0.185                   | (0.028)        | $4.8 \times 10^{-11}$                   | 0.152               | (0.028)        | $7.4 \times 10^{-8}$                    | 0.173               | (0.028)        | $1.1 \times 10^{-9}$                    | 0.177               | (0.028)        | $3.8 \times 10^{-10}$                   | -0.094              | (0.089) | 0.29                 |
| DQA1*01:02        | -0.151                  | (0.025)        | $1.9 \times 10^{-9}$                    | -0.113              | (0.026)        | $9.8 \times 10^{-6}$                    | -0.136              | (0.026)        | $1.1 \times 10^{-7}$                    | -0.143              | (0.026)        | $2.5 \times 10^{-8}$                    | 0.004               | (0.044) | 0.93                 |
| DPB1*06:01        | -0.591                  | (0.122)        | $1.2 \times 10^{-6}$                    | -0.556              | (0.121)        | $4.4 \times 10^{-6}$                    | -0.228              | (0.137)        | 0.095                                   | -0.208              | (0.136)        | 0.13                                    | -0.217              | (0.136) | 0.11                 |
| DRB3*02:02        | 0.129                   | (0.028)        | $3.0 \times 10^{-6}$                    | 0.131               | (0.028)        | $1.9 \times 10^{-6}$                    | 0.118               | (0.027)        | $1.9 \times 10^{-5}$                    | 0.109               | (0.027)        | $6.8 \times 10^{-5}$                    | 0.081               | (0.028) | $3.4 \times 10^{-3}$ |
| DQB1*03:01        | 0.108                   | (0.025)        | $1.9 \times 10^{-5}$                    | 0.153               | (0.026)        | $2.1 \times 10^{-9}$                    | 0.139               | (0.026)        | $6.0 \times 10^{-8}$                    | 0.131               | (0.025)        | $2.7 \times 10^{-7}$                    | 0.096               | (0.026) | $2.3 \times 10^{-4}$ |
| C*07:02           | -0.118                  | (0.028)        | $2.7 \times 10^{-5}$                    | -0.116              | (0.028)        | $3.0 \times 10^{-5}$                    | -0.117              | (0.028)        | $2.5 \times 10^{-5}$                    | -0.128              | (0.028)        | $3.7 \times 10^{-6}$                    | -0.051              | (0.031) | 0.096                |
| B*07:02           | -0.121                  | (0.029)        | $3.4 \times 10^{-5}$                    | -0.116              | (0.029)        | $6.3 \times 10^{-5}$                    | -0.118              | (0.029)        | $4.4 \times 10^{-5}$                    | -0.127              | (0.029)        | $1.0 \times 10^{-5}$                    | -0.039              | (0.033) | 0.23                 |
| C*16:01           | -0.178                  | (0.048)        | $2.1 \times 10^{-4}$                    | -0.154              | (0.048)        | $1.3 \times 10^{-3}$                    | -0.164              | (0.048)        | $5.7 \times 10^{-4}$                    | 0.096               | (0.064)        | 0.13                                    | 0.073               | (0.064) | 0.25                 |
| DQB1*03:02        | -0.114                  | (0.033)        | $4.8 \times 10^{-4}$                    | -0.080              | (0.033)        | 0.015                                   | 0.064               | (0.040)        | 0.11                                    | 0.051               | (0.040)        | 0.20                                    | 0.024               | (0.040) | 0.55                 |

**Supplementary Table 15:** TWAS results for antigen response phenotypes that were analyzed using gene expression models based on whole blood and brain tissues. Associations with  $P_{TWAS} < 4.2 \times 10^{-6}$  are considered statistically significant and genes with  $P_{TWAS} < 4.5 \times 10^{-5}$  are considered suggestive.

| Antigen   | Region   | Gene ID         | Gene               | Whole Blood |                      | Brain (Frontal Cortex) |                       |
|-----------|----------|-----------------|--------------------|-------------|----------------------|------------------------|-----------------------|
|           |          |                 |                    | Z           | $P_{TWAS}$           | Z                      | $P_{TWAS}$            |
| BKV       | 19q13.33 | ENSG00000176909 | <i>MAMSTR</i>      | -4.22       | $2.4 \times 10^{-5}$ | -                      | -                     |
|           | 7q21.2   | ENSG00000004766 | <i>VPS50</i>       | 4.09        | $4.4 \times 10^{-5}$ | -0.33                  | 0.74                  |
|           | 19q13.33 | ENSG00000142233 | <i>NTN5</i>        | -2.33       | 0.020                | 6.09                   | $1.1 \times 10^{-9}$  |
|           | 19q13.33 | ENSG00000176920 | <i>FUT2</i>        | -           | -                    | 7.16                   | $8.1 \times 10^{-13}$ |
|           | 20q13.2  | ENSG00000054803 | <i>CBLN4</i>       | -           | -                    | 4.09                   | $4.4 \times 10^{-5}$  |
| CMV pp150 | 16p13.3  | ENSG00000172366 | <i>MCRIP2</i>      | -0.44       | 0.66                 | -4.10                  | $4.1 \times 10^{-5}$  |
| CMV pp52  | 3q13.12  | ENSG00000196776 | <i>CD47</i>        | -4.49       | $7.3 \times 10^{-6}$ | -                      | -                     |
| HHV6 IE1A | 6p21.32  | ENSG00000196735 | <i>HLA-DQA1</i>    | 4.29        | $1.8 \times 10^{-5}$ | 4.34                   | $1.4 \times 10^{-5}$  |
|           | 6p21.33  | ENSG00000204525 | <i>HLA-C</i>       | -2.97       | $3.0 \times 10^{-3}$ | -4.25                  | $2.1 \times 10^{-5}$  |
| HHV6 p101 | 4q13.3   | ENSG00000163734 | <i>CXCL3</i>       | 4.12        | $3.8 \times 10^{-5}$ | 4.12                   | $3.8 \times 10^{-5}$  |
| HHV7      | 6p21.32  | ENSG00000232629 | <i>HLA-DQB2</i>    | 5.38        | $7.3 \times 10^{-8}$ | 5.29                   | $1.2 \times 10^{-7}$  |
|           | 6p21.32  | ENSG00000179344 | <i>HLA-DQB1</i>    | -5.07       | $3.9 \times 10^{-7}$ | 0.64                   | 0.52                  |
|           | 22q13.2  | ENSG00000273424 | <i>CTA-223H9.9</i> | -4.71       | $2.5 \times 10^{-6}$ | -4.71                  | $2.5 \times 10^{-6}$  |
|           | 22q13.2  | ENSG00000167074 | <i>TEF</i>         | 4.66        | $3.1 \times 10^{-6}$ | -                      | -                     |
|           | 22q13.33 | ENSG00000025708 | <i>TYMP</i>        | 4.54        | $5.6 \times 10^{-6}$ | 3.98                   | $6.8 \times 10^{-5}$  |
|           | 6p21.32  | ENSG00000204267 | <i>TAP2</i>        | -4.48       | $7.4 \times 10^{-6}$ | 1.90                   | 0.058                 |
|           | 17q21.32 | ENSG00000198933 | <i>TBKBP1</i>      | -4.41       | $1.0 \times 10^{-5}$ | -4.21                  | $2.6 \times 10^{-5}$  |
|           | 22q13.33 | ENSG00000177989 | <i>ODF3B</i>       | 4.30        | $1.7 \times 10^{-5}$ | 3.01                   | $2.6 \times 10^{-3}$  |
|           | 22q13.2  | ENSG00000100417 | <i>PMM1</i>        | -4.26       | $2.0 \times 10^{-5}$ | -1.90                  | 0.057                 |
|           | 6p21.33  | ENSG00000204428 | <i>LY6G5C</i>      | 4.24        | $2.3 \times 10^{-5}$ | 4.24                   | $2.3 \times 10^{-5}$  |
| HSV1      | 22q13.2  | ENSG00000172346 | <i>CSDC2</i>       | 4.14        | $3.4 \times 10^{-5}$ | 4.67                   | $3.0 \times 10^{-6}$  |
|           | 1q31.2   | ENSG00000090104 | <i>RGS1</i>        | 2.70        | $6.9 \times 10^{-3}$ | -4.65                  | $3.3 \times 10^{-6}$  |
|           | 2q11.2   | ENSG00000198885 | <i>ITPRIPL1</i>    | -2.66       | $7.9 \times 10^{-3}$ | -4.09                  | $4.4 \times 10^{-5}$  |
|           | 6p21.32  | ENSG00000204261 | <i>PSMB8-AS1</i>   | 2.38        | 0.017                | -5.06                  | $4.1 \times 10^{-7}$  |
|           | 6p21.32  | ENSG00000241404 | <i>EGFL8</i>       | -0.83       | 0.41                 | -5.36                  | $8.4 \times 10^{-8}$  |
|           | 6p21.32  | ENSG00000179344 | <i>HLA-DQB1</i>    | -5.46       | $4.8 \times 10^{-8}$ | -4.62                  | $3.9 \times 10^{-6}$  |
|           | 6p21.32  | ENSG00000232629 | <i>HLA-DQB2</i>    | 5.11        | $3.3 \times 10^{-7}$ | 4.99                   | $5.9 \times 10^{-7}$  |
|           | 6p21.32  | ENSG00000204257 | <i>HLA-DMA</i>     | 4.93        | $8.2 \times 10^{-7}$ | 4.88                   | $1.0 \times 10^{-6}$  |
|           | 6p21.33  | ENSG00000204444 | <i>APOM</i>        | -4.71       | $2.5 \times 10^{-6}$ | -4.60                  | $4.3 \times 10^{-6}$  |
|           | 6p21.33  | ENSG00000204386 | <i>NEU1</i>        | -4.44       | $9.1 \times 10^{-6}$ | -                      | -                     |
| HSV1      | 6p21.33  | ENSG00000231852 | <i>CYP21A2</i>     | 4.41        | $1.0 \times 10^{-5}$ | -                      | -                     |
|           | 6p21.33  | ENSG00000224389 | <i>C4B</i>         | 4.40        | $1.1 \times 10^{-5}$ | -                      | -                     |
|           | 6p21.33  | ENSG00000166278 | <i>C2</i>          | 4.38        | $1.2 \times 10^{-5}$ | -                      | -                     |
|           | 6p21.33  | ENSG00000213719 | <i>CLIC1</i>       | -4.34       | $1.5 \times 10^{-5}$ | -4.34                  | $1.5 \times 10^{-5}$  |
|           | 6p21.32  | ENSG00000204305 | <i>AGER</i>        | 4.13        | $3.6 \times 10^{-5}$ | 2.96                   | $3.0 \times 10^{-3}$  |

|     |         |                 |                  |        |                       |        |                       |
|-----|---------|-----------------|------------------|--------|-----------------------|--------|-----------------------|
|     | 6p21.33 | ENSG00000244731 | <i>C4A</i>       | -4.09  | $4.3 \times 10^{-5}$  | -4.29  | $1.8 \times 10^{-5}$  |
|     | 6p21.32 | ENSG00000204308 | <i>RNF5</i>      | -1.92  | 0.055                 | -4.82  | $1.5 \times 10^{-6}$  |
|     | 6p21.32 | ENSG00000196735 | <i>HLA-DQA1</i>  | -1.80  | 0.072                 | -4.25  | $2.1 \times 10^{-5}$  |
|     | 6p21.32 | ENSG00000242574 | <i>HLA-DMB</i>   | -0.81  | 0.42                  | 5.00   | $5.6 \times 10^{-7}$  |
|     | 6p21.32 | ENSG00000196126 | <i>HLA-DRB1</i>  | -      | -                     | -4.50  | $6.8 \times 10^{-6}$  |
|     | 6p21.32 | ENSG00000237541 | <i>HLA-DQA2</i>  | 7.09   | $1.3 \times 10^{-12}$ | -      | -                     |
|     | 6p21.33 | ENSG00000204371 | <i>EHMT2</i>     | -6.95  | $3.7 \times 10^{-12}$ | -      | -                     |
|     | 6p21.32 | ENSG00000204305 | <i>AGER</i>      | 6.14   | $8.0 \times 10^{-10}$ | 7.45   | $9.5 \times 10^{-14}$ |
|     | 6p21.32 | ENSG00000232629 | <i>HLA-DQB2</i>  | 6.11   | $9.9 \times 10^{-10}$ | 5.97   | $2.4 \times 10^{-9}$  |
|     | 6p21.32 | ENSG00000179344 | <i>HLA-DQB1</i>  | -5.88  | $4.2 \times 10^{-9}$  | -0.31  | 0.76                  |
|     | 6p21.33 | ENSG00000213722 | <i>DDAH2</i>     | -5.44  | $5.5 \times 10^{-8}$  | -1.34  | 0.18                  |
|     | 6p21.32 | ENSG00000204308 | <i>RNF5</i>      | -5.02  | $5.2 \times 10^{-7}$  | -1.74  | 0.082                 |
|     | 6p21.32 | ENSG00000204310 | <i>AGPAT1</i>    | -4.85  | $1.2 \times 10^{-6}$  | 5.07   | $4.1 \times 10^{-7}$  |
| JCV | 6p21.33 | ENSG00000198563 | <i>DDX39B</i>    | -4.84  | $1.3 \times 10^{-6}$  | -0.43  | 0.67                  |
|     | 6p21.32 | ENSG00000240065 | <i>PSMB9</i>     | 4.47   | $7.7 \times 10^{-6}$  | 2.01   | 0.045                 |
|     | 6p21.33 | ENSG00000213760 | <i>ATP6V1G2</i>  | 2.80   | $5.1 \times 10^{-3}$  | -4.46  | $8.3 \times 10^{-6}$  |
|     | 11q13.4 | ENSG00000214517 | <i>PPME1</i>     | 2.22   | 0.026                 | 4.31   | $1.6 \times 10^{-5}$  |
|     | 6p21.32 | ENSG00000204264 | <i>PSMB8</i>     | 1.99   | 0.047                 | 4.17   | $3.0 \times 10^{-5}$  |
|     | 6p21.32 | ENSG00000204252 | <i>HLA-DOA</i>   | -0.68  | 0.50                  | -4.56  | $5.2 \times 10^{-6}$  |
|     | 6p21.32 | ENSG00000204315 | <i>FKBPL</i>     | 0.01   | 0.99                  | -4.53  | $6.0 \times 10^{-6}$  |
|     | 6p21.32 | ENSG00000196126 | <i>HLA-DRB1</i>  | -      | -                     | -7.50  | $6.5 \times 10^{-14}$ |
|     | 6p21.33 | ENSG00000204540 | <i>PSORS1C1</i>  | -      | -                     | -4.69  | $2.8 \times 10^{-6}$  |
|     | 6p21.33 | ENSG00000204444 | <i>APOM</i>      | -10.73 | $7.5 \times 10^{-27}$ | -10.47 | $1.1 \times 10^{-25}$ |
|     | 6p21.33 | ENSG00000231852 | <i>CYP21A2</i>   | 10.53  | $6.5 \times 10^{-26}$ | -      | -                     |
|     | 6p21.33 | ENSG00000224389 | <i>C4B</i>       | 10.47  | $1.2 \times 10^{-25}$ | -      | -                     |
|     | 6p21.33 | ENSG00000166278 | <i>C2</i>        | 10.29  | $8.1 \times 10^{-25}$ | -      | -                     |
|     | 6p21.33 | ENSG00000204386 | <i>NEU1</i>      | -10.28 | $8.4 \times 10^{-25}$ | -      | -                     |
|     | 6p21.33 | ENSG00000213719 | <i>CLIC1</i>     | -10.22 | $1.6 \times 10^{-24}$ | -10.22 | $1.6 \times 10^{-24}$ |
|     | 6p21.33 | ENSG00000244731 | <i>C4A</i>       | -10.19 | $2.3 \times 10^{-24}$ | -10.16 | $2.9 \times 10^{-24}$ |
|     | 6p22.1  | ENSG00000204613 | <i>TRIM10</i>    | -8.82  | $1.1 \times 10^{-18}$ | -      | -                     |
|     | 6p21.32 | ENSG00000204305 | <i>AGER</i>      | 8.69   | $3.6 \times 10^{-18}$ | 4.44   | $9.1 \times 10^{-6}$  |
| VZV | 6p21.33 | ENSG00000214894 | <i>LINC00243</i> | 8.01   | $1.1 \times 10^{-15}$ | -      | -                     |
|     | 6p22.1  | ENSG00000281831 | <i>HCP5B</i>     | 7.90   | $2.8 \times 10^{-15}$ | 1.53   | 0.13                  |
|     | 6p22.1  | ENSG00000187626 | <i>ZKSCAN4</i>   | 7.84   | $4.5 \times 10^{-15}$ | 7.24   | $4.4 \times 10^{-13}$ |
|     | 6p22.1  | ENSG00000204681 | <i>GABBR1</i>    | 7.29   | $3.1 \times 10^{-13}$ | 1.02   | 0.31                  |
|     | 6p22.1  | ENSG00000204657 | <i>OR2H2</i>     | 7.09   | $1.3 \times 10^{-12}$ | 0.27   | 0.79                  |
|     | 6p22.1  | ENSG00000204644 | <i>ZFP57</i>     | 7.09   | $1.4 \times 10^{-12}$ | -      | -                     |
|     | 6p21.33 | ENSG00000204435 | <i>CSNK2B</i>    | 7.06   | $1.7 \times 10^{-12}$ | -4.09  | $4.2 \times 10^{-5}$  |
|     | 6p22.2  | ENSG00000186470 | <i>BTN3A2</i>    | -6.91  | $4.8 \times 10^{-12}$ | -6.72  | $1.8 \times 10^{-11}$ |
|     | 6p21.32 | ENSG00000204257 | <i>HLA-DMA</i>   | 6.75   | $1.5 \times 10^{-11}$ | 6.76   | $1.3 \times 10^{-11}$ |

|         |                 |             |       |                       |       |                       |
|---------|-----------------|-------------|-------|-----------------------|-------|-----------------------|
| 6p22.1  | ENSG00000158691 | ZSCAN12     | -6.73 | 1.7×10 <sup>-11</sup> | 5.45  | 5.0×10 <sup>-8</sup>  |
| 6p21.32 | ENSG00000204304 | PBX2        | -6.28 | 3.5×10 <sup>-10</sup> | -1.48 | 0.14                  |
| 6p22.1  | ENSG00000189298 | ZKSCAN3     | 6.20  | 5.7×10 <sup>-10</sup> | -2.35 | 0.019                 |
| 6p22.1  | ENSG00000206503 | HLA-A       | -6.14 | 8.2×10 <sup>-10</sup> | 0.13  | 0.89                  |
| 6p22.1  | ENSG00000261353 | CTA-14H9.5  | -5.96 | 2.5×10 <sup>-9</sup>  | -     | -                     |
| 6p21.32 | ENSG00000179344 | HLA-DQB1    | -5.96 | 2.6×10 <sup>-9</sup>  | -6.33 | 2.5×10 <sup>-10</sup> |
| 6p22.1  | ENSG00000137185 | ZSCAN9      | -5.86 | 4.7×10 <sup>-9</sup>  | 7.84  | 4.6×10 <sup>-15</sup> |
| 6p21.32 | ENSG00000232629 | HLA-DQB2    | 5.79  | 7.0×10 <sup>-9</sup>  | 5.61  | 2.1×10 <sup>-8</sup>  |
| 6p21.33 | ENSG00000204536 | CCHCR1      | 5.72  | 1.1×10 <sup>-8</sup>  | 7.34  | 2.2×10 <sup>-13</sup> |
| 6p22.1  | ENSG00000197062 | ZSCAN26     | -5.57 | 2.5×10 <sup>-8</sup>  | -5.71 | 1.1×10 <sup>-8</sup>  |
| 6p21.33 | ENSG00000204463 | BAG6        | 5.52  | 3.3×10 <sup>-8</sup>  | -4.29 | 1.8×10 <sup>-5</sup>  |
| 6p22.2  | ENSG00000180596 | HIST1H2BC   | -5.46 | 4.8×10 <sup>-8</sup>  | -2.38 | 0.017                 |
| 6p22.1  | ENSG00000204655 | MOG         | 5.42  | 5.9×10 <sup>-8</sup>  | -     | -                     |
| 6p22.2  | ENSG00000272462 | U91328.19   | 5.02  | 5.1×10 <sup>-7</sup>  | 2.19  | 0.028                 |
| 6p21.33 | ENSG00000204396 | VWA7        | -4.90 | 9.5×10 <sup>-7</sup>  | 5.72  | 1.0×10 <sup>-8</sup>  |
| 6p21.33 | ENSG00000204388 | HSPA1B      | 4.89  | 1.0×10 <sup>-6</sup>  | -     | -                     |
| 6p21.32 | ENSG00000221988 | PPT2        | 4.79  | 1.6×10 <sup>-6</sup>  | -1.48 | 0.14                  |
| 6p22.1  | ENSG00000272468 | RP1-86C11.7 | -4.61 | 3.9×10 <sup>-6</sup>  | 1.12  | 0.26                  |
| 6p22.1  | ENSG00000234127 | TRIM26      | 4.56  | 5.0×10 <sup>-6</sup>  | 1.58  | 0.11                  |
| 6p22.1  | ENSG00000137338 | PGBD1       | 4.56  | 5.2×10 <sup>-6</sup>  | 1.34  | 0.18                  |
| 6p22.2  | ENSG00000010704 | HFE         | -4.42 | 9.8×10 <sup>-6</sup>  | -1.15 | 0.25                  |
| 6p22.1  | ENSG00000241370 | RPP21       | 4.41  | 1.0×10 <sup>-5</sup>  | -3.91 | 9.3×10 <sup>-5</sup>  |
| 6p21.33 | ENSG00000204371 | EHMT2       | -4.36 | 1.3×10 <sup>-5</sup>  | -     | -                     |
| 6p22.1  | ENSG00000204632 | HLA-G       | 4.24  | 2.2×10 <sup>-5</sup>  | -0.64 | 0.52                  |
| 6p22.2  | ENSG00000124508 | BTN2A2      | 4.22  | 2.5×10 <sup>-5</sup>  | -1.95 | 0.051                 |
| 6p21.32 | ENSG00000204310 | AGPAT1      | -3.70 | 2.2×10 <sup>-4</sup>  | 4.26  | 2.0×10 <sup>-5</sup>  |
| 6p21.33 | ENSG00000204387 | C6orf48     | -2.96 | 3.1×10 <sup>-3</sup>  | -4.18 | 3.0×10 <sup>-5</sup>  |
| 6p21.32 | ENSG00000204264 | PSMB8       | 2.89  | 3.8×10 <sup>-3</sup>  | 4.83  | 1.3×10 <sup>-6</sup>  |
| 6p21.33 | ENSG00000213722 | DDAH2       | -2.46 | 0.014                 | -8.27 | 1.3×10 <sup>-16</sup> |
| 6p21.32 | ENSG00000204301 | NOTCH4      | -2.37 | 0.018                 | -6.98 | 3.0×10 <sup>-12</sup> |
| 6p21.33 | ENSG00000204420 | MPIG6B      | 2.10  | 0.036                 | -5.68 | 1.4×10 <sup>-8</sup>  |
| 6p22.1  | ENSG00000112812 | PRSS16      | 2.03  | 0.043                 | 4.94  | 7.7×10 <sup>-7</sup>  |
| 6p22.1  | ENSG00000198315 | ZKSCAN8     | 1.66  | 0.097                 | -4.90 | 9.5×10 <sup>-7</sup>  |
| 6p21.33 | ENSG00000137411 | VAR2        | -1.64 | 0.10                  | -5.17 | 2.3×10 <sup>-7</sup>  |
| 6p21.33 | ENSG00000204410 | MSH5        | -1.45 | 0.15                  | -7.81 | 5.7×10 <sup>-15</sup> |
| 6p21.32 | ENSG00000213676 | ATF6B       | -1.36 | 0.18                  | -4.38 | 1.2×10 <sup>-5</sup>  |
| 6p21.33 | ENSG00000137312 | FLOT1       | 1.22  | 0.22                  | 6.32  | 2.6×10 <sup>-10</sup> |
| 6p21.33 | ENSG00000226979 | LTA         | -0.97 | 0.33                  | 4.09  | 4.3×10 <sup>-5</sup>  |
| 6p21.33 | ENSG00000213760 | ATP6V1G2    | 0.83  | 0.40                  | -5.43 | 5.8×10 <sup>-8</sup>  |
| 6p21.32 | ENSG00000204308 | RNF5        | -0.69 | 0.49                  | -9.65 | 5.2×10 <sup>-22</sup> |



|         |                 |                 |       |      |       |                       |
|---------|-----------------|-----------------|-------|------|-------|-----------------------|
| 6p21.32 | ENSG00000242574 | <i>HLA-DMB</i>  | 0.55  | 0.58 | 6.63  | $3.3 \times 10^{-11}$ |
| 6p21.32 | ENSG00000196735 | <i>HLA-DQA1</i> | -0.37 | 0.71 | -5.22 | $1.8 \times 10^{-7}$  |
| 6p21.33 | ENSG00000228022 | <i>HCG20</i>    | -     | -    | -5.62 | $1.9 \times 10^{-8}$  |
| 6p21.33 | ENSG00000204540 | <i>PSORS1C1</i> | -     | -    | -5.09 | $3.6 \times 10^{-7}$  |
| 6p21.33 | ENSG00000204531 | <i>POU5F1</i>   | -     | -    | 4.23  | $2.4 \times 10^{-5}$  |
| 10p14   | ENSG00000151657 | <i>KIN</i>      | -     | -    | 4.14  | $3.5 \times 10^{-5}$  |

**Supplementary Table 16:** TWAS results for EBV antigen response phenotypes that were analyzed using gene expression models based on whole blood, brain tissues, and EBV-transformed lymphocytes. Associations with  $P_{TWAS} < 4.2 \times 10^{-6}$  are considered statistically significant and genes with  $P_{TWAS} < 4.5 \times 10^{-5}$  are considered suggestive.

| Antigen     | Region          | Gene ID         | Gene             | Whole Blood |                       | Brain (Frontal Cortex) |                       | EBV Lymphocytes |                       |
|-------------|-----------------|-----------------|------------------|-------------|-----------------------|------------------------|-----------------------|-----------------|-----------------------|
|             |                 |                 |                  | Z           | $P_{TWAS}$            | Z                      | $P_{TWAS}$            | Z               | $P_{TWAS}$            |
| EBV<br>EA-D | 6p21.32         | ENSG00000204257 | <i>HLA-DMA</i>   | -5.91       | $3.5 \times 10^{-9}$  | -5.93                  | $3.0 \times 10^{-9}$  | 5.88            | $4.0 \times 10^{-9}$  |
|             | 6p21.33         | ENSG00000204444 | <i>APOM</i>      | 5.86        | $4.6 \times 10^{-9}$  | 5.73                   | $1.0 \times 10^{-8}$  | 5.45            | $5.1 \times 10^{-8}$  |
|             | 6p21.33         | ENSG00000166278 | <i>C2</i>        | -5.70       | $1.2 \times 10^{-8}$  | -                      | -                     | -               | -                     |
|             | 6p21.33         | ENSG00000244731 | <i>C4A</i>       | 5.66        | $1.5 \times 10^{-8}$  | 5.55                   | $2.9 \times 10^{-8}$  | 5.59            | $2.3 \times 10^{-8}$  |
|             | 6p21.33         | ENSG00000204386 | <i>NEU1</i>      | 5.59        | $2.3 \times 10^{-8}$  | -                      | -                     | -1.65           | 0.099                 |
|             | 6p21.33         | ENSG00000213719 | <i>CLIC1</i>     | 5.55        | $2.9 \times 10^{-8}$  | 5.55                   | $2.9 \times 10^{-8}$  | 1.14            | 0.25                  |
|             | 6p21.33         | ENSG00000224389 | <i>C4B</i>       | -5.43       | $5.6 \times 10^{-8}$  | -                      | -                     | -               | -                     |
|             | 6p21.33         | ENSG00000231852 | <i>CYP21A2</i>   | -5.41       | $6.4 \times 10^{-8}$  | -                      | -                     | -               | -                     |
|             | 6p22.1          | ENSG00000281831 | <i>HCP5B</i>     | -4.66       | $3.2 \times 10^{-6}$  | -5.30                  | $1.1 \times 10^{-7}$  | -6.01           | $1.9 \times 10^{-9}$  |
|             | 6p22.1          | ENSG00000204625 | <i>HCG9</i>      | -4.52       | $6.2 \times 10^{-6}$  | -                      | -                     | -               | -                     |
|             | 6p22.1          | ENSG00000204613 | <i>TRIM10</i>    | 4.48        | $7.6 \times 10^{-6}$  | -                      | -                     | -               | -                     |
|             | 6p21.33         | ENSG00000204388 | <i>HSPA1B</i>    | -4.43       | $9.3 \times 10^{-6}$  | -                      | -                     | 1.61            | 0.11                  |
|             | 6p21.33         | ENSG00000214894 | <i>LINC00243</i> | -4.38       | $1.2 \times 10^{-5}$  | -                      | -                     | 1.19            | 0.23                  |
|             | 6q22.1          | ENSG00000188820 | <i>FAM26F</i>    | 4.26        | $2.0 \times 10^{-5}$  | 4.68                   | $2.8 \times 10^{-6}$  | 3.41            | $6.4 \times 10^{-4}$  |
|             | 6p21.33         | ENSG00000204536 | <i>CCHCR1</i>    | -3.77       | $1.7 \times 10^{-4}$  | -4.75                  | $2.1 \times 10^{-6}$  | 0.40            | 0.69                  |
|             | 20q11.23        | ENSG00000080839 | <i>RBL1</i>      | -2.68       | $7.3 \times 10^{-3}$  | -2.28                  | 0.022                 | -4.10           | $4.2 \times 10^{-5}$  |
|             | 12q23.1         | ENSG00000139343 | <i>SNRPF</i>     | -2.46       | 0.014                 | -4.12                  | $3.9 \times 10^{-5}$  | -4.13           | $3.6 \times 10^{-5}$  |
|             | 6p21.33         | ENSG00000204410 | <i>MSH5</i>      | -2.40       | 0.016                 | 5.71                   | $1.2 \times 10^{-8}$  | -1.32           | 0.19                  |
|             | 6p21.32         | ENSG00000242574 | <i>HLA-DMB</i>   | 2.00        | 0.046                 | -5.80                  | $6.8 \times 10^{-9}$  | -2.59           | $9.7 \times 10^{-3}$  |
|             | 6p21.32         | ENSG00000232629 | <i>HLA-DQB2</i>  | 1.48        | 0.14                  | 1.31                   | 0.19                  | 4.15            | $3.3 \times 10^{-5}$  |
|             | 6p21.33         | ENSG00000204482 | <i>LST1</i>      | 0.87        | 0.39                  | -                      | -                     | -4.34           | $1.4 \times 10^{-5}$  |
|             | 6p21.33         | ENSG00000204560 | <i>DHX16</i>     | 0.72        | 0.47                  | 0.07                   | 0.94                  | -4.17           | $3.1 \times 10^{-5}$  |
|             | 6p21.32         | ENSG00000198502 | <i>HLA-DRB5</i>  | -           | -                     | -                      | -                     | -5.85           | $4.8 \times 10^{-9}$  |
|             | 6p21.33         | ENSG00000204531 | <i>POU5F1</i>    | -           | -                     | -1.64                  | 0.10                  | -5.40           | $6.7 \times 10^{-8}$  |
|             | 6p21.33         | ENSG00000204540 | <i>PSORS1C1</i>  | -           | -                     | 4.43                   | $9.6 \times 10^{-6}$  | 4.67            | $3.0 \times 10^{-6}$  |
|             | 6p21.33         | ENSG00000228022 | <i>HCG20</i>     | -           | -                     | 4.10                   | $4.2 \times 10^{-5}$  | 3.58            | $3.5 \times 10^{-4}$  |
| 6p21.32     | ENSG00000196126 | <i>HLA-DRB1</i> | -                | -           | -4.38                 | $1.2 \times 10^{-5}$   | -                     | -               |                       |
| EBV<br>EBNA | 6p21.32         | ENSG00000179344 | <i>HLA-DQB1</i>  | 13.30       | $2.2 \times 10^{-40}$ | 11.46                  | $2.2 \times 10^{-30}$ | 10.67           | $1.4 \times 10^{-26}$ |
|             | 6p21.32         | ENSG00000232629 | <i>HLA-DQB2</i>  | -12.19      | $3.6 \times 10^{-34}$ | -12.16                 | $5.0 \times 10^{-34}$ | -3.78           | $1.6 \times 10^{-4}$  |
|             | 6p21.32         | ENSG00000204305 | <i>AGER</i>      | -10.70      | $9.9 \times 10^{-27}$ | -8.91                  | $5.1 \times 10^{-19}$ | -7.28           | $3.4 \times 10^{-13}$ |
|             | 6p21.33         | ENSG00000204371 | <i>EHMT2</i>     | 9.43        | $4.0 \times 10^{-21}$ | -                      | -                     | -               | -                     |
|             | 6p21.33         | ENSG00000213722 | <i>DDAH2</i>     | 9.00        | $2.2 \times 10^{-19}$ | 7.76                   | $8.6 \times 10^{-15}$ | 0.01            | 1.00                  |
|             | 6p21.33         | ENSG00000204435 | <i>CSNK2B</i>    | -7.62       | $2.5 \times 10^{-14}$ | 3.36                   | $7.8 \times 10^{-4}$  | -1.61           | 0.11                  |
|             | 6p21.32         | ENSG00000204308 | <i>RNF5</i>      | 7.53        | $5.0 \times 10^{-14}$ | 9.45                   | $3.6 \times 10^{-21}$ | 10.17           | $2.8 \times 10^{-24}$ |

|             |                 |                 |                 |       |                       |                      |                       |       |                       |
|-------------|-----------------|-----------------|-----------------|-------|-----------------------|----------------------|-----------------------|-------|-----------------------|
|             | 6p21.32         | ENSG00000204304 | <i>PBX2</i>     | 7.31  | 2.7×10 <sup>-13</sup> | 4.05                 | 5.1×10 <sup>-5</sup>  | 4.05  | 5.1×10 <sup>-5</sup>  |
|             | 6p21.33         | ENSG00000204444 | <i>APOM</i>     | 7.30  | 2.8×10 <sup>-13</sup> | 7.16                 | 7.8×10 <sup>-13</sup> | 6.14  | 8.2×10 <sup>-10</sup> |
|             | 6p21.32         | ENSG00000204310 | <i>AGPAT1</i>   | 7.30  | 3.0×10 <sup>-13</sup> | -7.57                | 3.7×10 <sup>-14</sup> | -     | -                     |
|             | 6p21.33         | ENSG00000204463 | <i>BAG6</i>     | -7.07 | 1.5×10 <sup>-12</sup> | 3.26                 | 1.1×10 <sup>-3</sup>  | 2.51  | 0.012                 |
|             | 6p21.32         | ENSG00000204315 | <i>FKBPL</i>    | -6.74 | 1.6×10 <sup>-11</sup> | 4.81                 | 1.5×10 <sup>-6</sup>  | -     | -                     |
|             | 6p21.33         | ENSG00000224389 | <i>C4B</i>      | -6.43 | 1.3×10 <sup>-10</sup> | -                    | -                     | -     | -                     |
|             | 6p21.33         | ENSG00000231852 | <i>CYP21A2</i>  | -6.41 | 1.4×10 <sup>-10</sup> | -                    | -                     | -     | -                     |
|             | 6p21.33         | ENSG00000213719 | <i>CLIC1</i>    | 6.21  | 5.3×10 <sup>-10</sup> | 6.21                 | 5.3×10 <sup>-10</sup> | 6.98  | 3.0×10 <sup>-12</sup> |
|             | 6p21.33         | ENSG00000166278 | <i>C2</i>       | -6.21 | 5.3×10 <sup>-10</sup> | -                    | -                     | -     | -                     |
|             | 6p21.33         | ENSG00000204386 | <i>NEU1</i>     | 6.14  | 8.2×10 <sup>-10</sup> | -                    | -                     | -2.05 | 0.040                 |
|             | 6p21.33         | ENSG00000204536 | <i>CCHCR1</i>   | -5.94 | 2.9×10 <sup>-9</sup>  | -5.82                | 6.0×10 <sup>-9</sup>  | 3.30  | 9.7×10 <sup>-4</sup>  |
|             | 6p21.33         | ENSG00000227507 | <i>LTB</i>      | 5.77  | 7.8×10 <sup>-9</sup>  | -                    | -                     | -     | -                     |
|             | 3q25.1          | ENSG00000169313 | <i>P2RY12</i>   | 5.53  | 3.3×10 <sup>-8</sup>  | 5.20                 | 2.0×10 <sup>-7</sup>  | 5.20  | 2.0×10 <sup>-7</sup>  |
|             | 6p21.33         | ENSG00000244731 | <i>C4A</i>      | 5.30  | 1.2×10 <sup>-7</sup>  | 5.83                 | 5.6×10 <sup>-9</sup>  | 7.18  | 6.8×10 <sup>-13</sup> |
|             | 6p21.32         | ENSG00000236104 | <i>ZBTB22</i>   | -5.13 | 2.9×10 <sup>-7</sup>  | -3.73                | 1.9×10 <sup>-4</sup>  | -     | -                     |
|             | 6p21.32         | ENSG00000204314 | <i>PRRT1</i>    | -5.02 | 5.1×10 <sup>-7</sup>  | -                    | -                     | -9.99 | 1.6×10 <sup>-23</sup> |
|             | 6p21.33         | ENSG00000204396 | <i>VWA7</i>     | 4.96  | 7.0×10 <sup>-7</sup>  | -6.57                | 4.9×10 <sup>-11</sup> | 0.42  | 0.68                  |
|             | 6p21.32         | ENSG00000204209 | <i>DAXX</i>     | 4.94  | 7.8×10 <sup>-7</sup>  | 0.19                 | 0.85                  | 4.55  | 5.3×10 <sup>-6</sup>  |
|             | 6p21.32         | ENSG00000237541 | <i>HLA-DQA2</i> | -4.84 | 1.3×10 <sup>-6</sup>  | -                    | -                     | -     | -                     |
| EBV<br>EBNA | 6p21.32         | ENSG00000204257 | <i>HLA-DMA</i>  | -4.69 | 2.7×10 <sup>-6</sup>  | -4.54                | 5.5×10 <sup>-6</sup>  | 4.64  | 3.5×10 <sup>-6</sup>  |
|             | 6p21.32         | ENSG00000227057 | <i>WDR46</i>    | -4.54 | 5.6×10 <sup>-6</sup>  | -1.86                | 0.063                 | -1.86 | 0.063                 |
|             | 6p21.33         | ENSG00000204366 | <i>ZBTB12</i>   | -4.44 | 8.9×10 <sup>-6</sup>  | 3.02                 | 2.5×10 <sup>-3</sup>  | 0.26  | 0.80                  |
|             | 6p21.33         | ENSG00000204420 | <i>MPIG6B</i>   | -4.44 | 9.0×10 <sup>-6</sup>  | 2.89                 | 3.8×10 <sup>-3</sup>  | 4.44  | 9.0×10 <sup>-6</sup>  |
|             | 6p21.33         | ENSG00000204344 | <i>STK19</i>    | 4.44  | 9.1×10 <sup>-6</sup>  | 1.21                 | 0.23                  | -     | -                     |
|             | 6p21.32         | ENSG00000231925 | <i>TAPBP</i>    | -4.37 | 1.2×10 <sup>-5</sup>  | -5.18                | 2.3×10 <sup>-7</sup>  | 5.42  | 5.9×10 <sup>-8</sup>  |
|             | 6p22.1          | ENSG00000204625 | <i>HCG9</i>     | -4.25 | 2.1×10 <sup>-5</sup>  | -                    | -                     | -     | -                     |
|             | 6p21.32         | ENSG00000196735 | <i>HLA-DQA1</i> | 4.18  | 2.9×10 <sup>-5</sup>  | 11.93                | 8.8×10 <sup>-33</sup> | 0.87  | 0.38                  |
|             | 6p21.32         | ENSG00000221988 | <i>PPT2</i>     | -3.72 | 2.0×10 <sup>-4</sup>  | -0.59                | 0.55                  | -6.36 | 2.0×10 <sup>-10</sup> |
|             | 6p22.1          | ENSG00000281831 | <i>HCP5B</i>    | -3.49 | 4.9×10 <sup>-4</sup>  | -4.24                | 2.3×10 <sup>-5</sup>  | -5.08 | 3.7×10 <sup>-7</sup>  |
|             | 6p21.33         | ENSG00000206344 | <i>HCG27</i>    | -3.22 | 1.3×10 <sup>-3</sup>  | 0.74                 | 0.46                  | -5.86 | 4.6×10 <sup>-9</sup>  |
|             | 6p21.33         | ENSG00000232810 | <i>TNF</i>      | 3.06  | 2.2×10 <sup>-3</sup>  | 3.06                 | 2.2×10 <sup>-3</sup>  | -7.43 | 1.1×10 <sup>-13</sup> |
|             | 6p21.33         | ENSG00000213760 | <i>ATP6V1G2</i> | -3.04 | 2.4×10 <sup>-3</sup>  | 3.58                 | 3.5×10 <sup>-4</sup>  | -4.89 | 9.9×10 <sup>-7</sup>  |
|             | 6p21.32         | ENSG00000204252 | <i>HLA-DOA</i>  | 2.45  | 0.014                 | 7.80                 | 6.3×10 <sup>-15</sup> | 1.84  | 0.066                 |
|             | 6p21.33         | ENSG00000204410 | <i>MSH5</i>     | -2.04 | 0.041                 | 5.27                 | 1.4×10 <sup>-7</sup>  | 1.68  | 0.093                 |
|             | 6p21.32         | ENSG00000231389 | <i>HLA-DPA1</i> | -1.97 | 0.049                 | -5.49                | 4.1×10 <sup>-8</sup>  | 0.33  | 0.74                  |
|             | 6p21.32         | ENSG00000223865 | <i>HLA-DPB1</i> | 1.96  | 0.050                 | -6.35                | 2.1×10 <sup>-10</sup> | -     | -                     |
|             | 6p22.1          | ENSG00000234127 | <i>TRIM26</i>   | 1.34  | 0.18                  | -4.69                | 2.7×10 <sup>-6</sup>  | 1.34  | 0.18                  |
|             | 6p21.32         | ENSG00000242574 | <i>HLA-DMB</i>  | 1.22  | 0.22                  | -5.05                | 4.4×10 <sup>-7</sup>  | -3.61 | 3.1×10 <sup>-4</sup>  |
|             | 6p21.33         | ENSG00000204469 | <i>PRRC2A</i>   | -1.20 | 0.23                  | 0.62                 | 0.53                  | -7.58 | 3.5×10 <sup>-14</sup> |
| 6p21.32     | ENSG00000204228 | <i>HSD17B8</i>  | 1.16            | 0.25  | 4.63                  | 3.7×10 <sup>-6</sup> | 1.14                  | 0.26  |                       |

|             |         |                 |                  |       |                       |       |                       |       |                       |
|-------------|---------|-----------------|------------------|-------|-----------------------|-------|-----------------------|-------|-----------------------|
| EBV<br>EBNA | 6p21.33 | ENSG00000204388 | <i>HSPA1B</i>    | 1.05  | 0.30                  | -     | -                     | 4.46  | 8.4×10 <sup>-6</sup>  |
|             | 6p21.33 | ENSG00000226979 | <i>LTA</i>       | -0.75 | 0.45                  | -5.76 | 8.6×10 <sup>-9</sup>  | -5.71 | 1.1×10 <sup>-8</sup>  |
|             | 6p21.32 | ENSG00000204231 | <i>RXRΒ</i>      | -0.67 | 0.50                  | 4.54  | 5.7×10 <sup>-6</sup>  | 0.67  | 0.50                  |
|             | 3q25.1  | ENSG00000181631 | <i>P2RY13</i>    | 0.48  | 0.63                  | 5.72  | 1.1×10 <sup>-8</sup>  | -0.13 | 0.90                  |
|             | 6p21.32 | ENSG00000204301 | <i>NOTCH4</i>    | 0.36  | 0.72                  | 4.41  | 1.0×10 <sup>-5</sup>  | 2.12  | 0.034                 |
|             | 6p21.33 | ENSG00000204389 | <i>HSPA1A</i>    | -     | -                     | -     | -                     | 8.81  | 1.3×10 <sup>-18</sup> |
|             | 6p21.33 | ENSG00000204531 | <i>POU5F1</i>    | -     | -                     | -4.32 | 1.5×10 <sup>-5</sup>  | -6.23 | 4.7×10 <sup>-10</sup> |
|             | 6p21.32 | ENSG00000198502 | <i>HLA-DRB5</i>  | -     | -                     | -     | -                     | 5.24  | 1.6×10 <sup>-7</sup>  |
|             | 6p21.33 | ENSG00000168631 | <i>DPCR1</i>     | -     | -                     | -     | -                     | 4.92  | 8.5×10 <sup>-7</sup>  |
|             | 6p21.33 | ENSG00000204540 | <i>PSORS1C1</i>  | -     | -                     | 4.89  | 1.0×10 <sup>-6</sup>  | 4.91  | 9.3×10 <sup>-7</sup>  |
|             | 6p21.33 | ENSG00000137337 | <i>MDC1</i>      | -     | -                     | -     | -                     | 4.73  | 2.2×10 <sup>-6</sup>  |
|             | 6p21.32 | ENSG00000204287 | <i>HLA-DRA</i>   | -     | -                     | -     | -                     | 4.67  | 3.0×10 <sup>-6</sup>  |
|             | 6p21.32 | ENSG00000168477 | <i>TNXB</i>      | -     | -                     | -     | -                     | 4.25  | 2.2×10 <sup>-5</sup>  |
|             | 6p21.33 | ENSG00000228789 | <i>HCG22</i>     | -     | -                     | -4.47 | 7.7×10 <sup>-6</sup>  | 3.27  | 1.1×10 <sup>-3</sup>  |
|             | 6p21.32 | ENSG00000196126 | <i>HLA-DRB1</i>  | -     | -                     | 13.05 | 6.7×10 <sup>-39</sup> | -     | -                     |
|             | 6p22.1  | ENSG00000270604 | <i>HCG17</i>     | -     | -                     | 4.16  | 3.3×10 <sup>-5</sup>  | -     | -                     |
| EBV p18     | 6p21.33 | ENSG00000213722 | <i>DDAH2</i>     | 9.74  | 2.0×10 <sup>-22</sup> | 6.03  | 1.6×10 <sup>-9</sup>  | 1.85  | 0.064                 |
|             | 6p21.33 | ENSG00000204371 | <i>EHMT2</i>     | 9.56  | 1.2×10 <sup>-21</sup> | -     | -                     | -     | -                     |
|             | 6p21.32 | ENSG00000204305 | <i>AGER</i>      | -8.39 | 4.8×10 <sup>-17</sup> | -8.90 | 5.4×10 <sup>-19</sup> | -5.02 | 5.1×10 <sup>-7</sup>  |
|             | 6p21.33 | ENSG00000204463 | <i>BAG6</i>      | -8.20 | 2.5×10 <sup>-16</sup> | -2.14 | 0.032                 | -1.18 | 0.24                  |
|             | 6p21.33 | ENSG00000204536 | <i>CCHCR1</i>    | -6.66 | 2.7×10 <sup>-11</sup> | -5.05 | 4.4×10 <sup>-7</sup>  | 0.09  | 0.93                  |
|             | 6p21.33 | ENSG00000227507 | <i>LTB</i>       | 6.65  | 3.0×10 <sup>-11</sup> | -     | -                     | -     | -                     |
|             | 6p21.33 | ENSG00000213760 | <i>ATP6V1G2</i>  | -6.36 | 2.0×10 <sup>-10</sup> | 2.65  | 8.1×10 <sup>-3</sup>  | -7.02 | 2.2×10 <sup>-12</sup> |
|             | 6p21.32 | ENSG00000179344 | <i>HLA-DQB1</i>  | 5.79  | 7.1×10 <sup>-9</sup>  | 5.74  | 9.8×10 <sup>-9</sup>  | 4.65  | 3.3×10 <sup>-6</sup>  |
|             | 6p21.33 | ENSG00000137310 | <i>TCF19</i>     | -5.76 | 8.6×10 <sup>-9</sup>  | -3.44 | 5.9×10 <sup>-4</sup>  | 3.65  | 2.6×10 <sup>-4</sup>  |
|             | 6p21.32 | ENSG00000204310 | <i>AGPAT1</i>    | 5.72  | 1.1×10 <sup>-8</sup>  | -6.10 | 1.1×10 <sup>-9</sup>  | -     | -                     |
|             | 6p21.32 | ENSG00000232629 | <i>HLA-DQB2</i>  | -5.61 | 2.1×10 <sup>-8</sup>  | -5.64 | 1.7×10 <sup>-8</sup>  | -1.74 | 0.082                 |
|             | 6p21.33 | ENSG00000214894 | <i>LINC00243</i> | -5.60 | 2.2×10 <sup>-8</sup>  | -     | -                     | -0.16 | 0.87                  |
|             | 6p21.32 | ENSG00000237541 | <i>HLA-DQA2</i>  | -5.41 | 6.5×10 <sup>-8</sup>  | -     | -                     | -     | -                     |
|             | 6p21.33 | ENSG00000166278 | <i>C2</i>        | -5.35 | 8.9×10 <sup>-8</sup>  | -     | -                     | -     | -                     |
|             | 6p22.2  | ENSG00000186470 | <i>BTN3A2</i>    | 5.33  | 9.9×10 <sup>-8</sup>  | 5.05  | 4.4×10 <sup>-7</sup>  | 5.25  | 1.5×10 <sup>-7</sup>  |
|             | 6p21.33 | ENSG00000213719 | <i>CLIC1</i>     | 5.31  | 1.1×10 <sup>-7</sup>  | 5.31  | 1.1×10 <sup>-7</sup>  | 6.84  | 8.2×10 <sup>-12</sup> |
|             | 6p21.33 | ENSG00000204386 | <i>NEU1</i>      | 5.26  | 1.5×10 <sup>-7</sup>  | -     | -                     | -1.05 | 0.29                  |
|             | 6p21.33 | ENSG00000204396 | <i>VWA7</i>      | 5.21  | 1.9×10 <sup>-7</sup>  | -6.23 | 4.8×10 <sup>-10</sup> | 1.10  | 0.27                  |
|             | 6p21.33 | ENSG00000204469 | <i>PRRC2A</i>    | -5.16 | 2.4×10 <sup>-7</sup>  | 0.77  | 0.44                  | -8.33 | 8.1×10 <sup>-17</sup> |
|             | 6p21.33 | ENSG00000206344 | <i>HCG27</i>     | -5.11 | 3.3×10 <sup>-7</sup>  | -1.61 | 0.11                  | -8.68 | 4.1×10 <sup>-18</sup> |
|             | 6p21.33 | ENSG00000224389 | <i>C4B</i>       | -5.03 | 4.9×10 <sup>-7</sup>  | -     | -                     | -     | -                     |
|             | 6p21.33 | ENSG00000204444 | <i>APOM</i>      | 4.97  | 6.6×10 <sup>-7</sup>  | 4.83  | 1.4-6                 | 5.38  | 7.5×10 <sup>-8</sup>  |
|             | 6p21.33 | ENSG00000231852 | <i>CYP21A2</i>   | -4.95 | 7.3×10 <sup>-7</sup>  | -     | -                     | -     | -                     |
|             | 6p21.32 | ENSG00000204304 | <i>PBX2</i>      | 4.83  | 1.4×10 <sup>-6</sup>  | 0.20  | 0.84                  | 0.20  | 0.84                  |

|                |                 |                          |       |                      |       |                       |        |                       |
|----------------|-----------------|--------------------------|-------|----------------------|-------|-----------------------|--------|-----------------------|
| 6p22.2         | ENSG00000124508 | <i>BTN2A2</i>            | -4.70 | 2.6×10 <sup>-6</sup> | -0.72 | 0.47                  | 5.06   | 4.2×10 <sup>-7</sup>  |
| 6p22.1         | ENSG00000261353 | <i>CTA-14H9.5</i>        | 4.67  | 3.0×10 <sup>-6</sup> | -     | -                     | -3.65  | 2.6×10 <sup>-4</sup>  |
| 6p22.1         | ENSG00000137185 | <i>ZSCAN9</i>            | 4.53  | 6.0×10 <sup>-6</sup> | -4.40 | 1.1×10 <sup>-5</sup>  | 4.40   | 1.1×10 <sup>-5</sup>  |
| 6p22.1         | ENSG00000197279 | <i>ZNF165</i>            | -4.50 | 6.9×10 <sup>-6</sup> | -0.76 | 0.45                  | -2.03  | 0.042                 |
| 6p22.1         | ENSG00000158691 | <i>ZSCAN12</i>           | 4.45  | 8.6×10 <sup>-6</sup> | -3.27 | 1.1×10 <sup>-3</sup>  | 4.46   | 8.1×10 <sup>-6</sup>  |
| 6p22.1         | ENSG00000187626 | <i>ZKSCAN4</i>           | -4.42 | 1.0×10 <sup>-5</sup> | -4.79 | 1.7×10 <sup>-6</sup>  | -4.79  | 1.7×10 <sup>-6</sup>  |
| 19q13.12       | ENSG00000126243 | <i>LRFN3</i>             | 4.34  | 1.4×10 <sup>-5</sup> | 4.14  | 3.5×10 <sup>-5</sup>  | 4.47   | 7.8×10 <sup>-6</sup>  |
| 9q21.11        | ENSG00000226337 | <i>RP11-274B18.4</i>     | -4.22 | 2.5×10 <sup>-5</sup> | -     | -                     | -      | -                     |
| 19q13.12       | ENSG00000011600 | <i>TYROBP</i>            | -4.22 | 2.5×10 <sup>-5</sup> | 4.22  | 2.5×10 <sup>-5</sup>  | -      | -                     |
| 6p22.1         | ENSG00000197062 | <i>ZSCAN26</i>           | 4.18  | 2.9×10 <sup>-5</sup> | 4.33  | 1.5×10 <sup>-5</sup>  | 3.86   | 1.1×10 <sup>-4</sup>  |
| 6p22.1         | ENSG00000272468 | <i>RP1-86C11.7</i>       | 4.17  | 3.1×10 <sup>-5</sup> | -0.93 | 0.35                  | -      | -                     |
| 6p21.32        | ENSG00000204257 | <i>HLA-DMA</i>           | -4.15 | 3.4×10 <sup>-5</sup> | -4.11 | 3.9×10 <sup>-5</sup>  | 4.16   | 3.2×10 <sup>-5</sup>  |
| 6p22.1         | ENSG00000204613 | <i>TRIM10</i>            | 4.10  | 4.2×10 <sup>-5</sup> | -     | -                     | -      | -                     |
| 6p21.33        | ENSG00000244731 | <i>C4A</i>               | 4.01  | 6.1×10 <sup>-5</sup> | 4.24  | 2.2×10 <sup>-5</sup>  | 5.60   | 2.2×10 <sup>-8</sup>  |
| 6p21.32        | ENSG00000241106 | <i>HLA-DOB</i>           | 3.97  | 7.1×10 <sup>-5</sup> | 4.54  | 5.6×10 <sup>-6</sup>  | -1.10  | 0.27                  |
| 6p21.33        | ENSG00000204435 | <i>CSNK2B</i>            | -3.97 | 7.1×10 <sup>-5</sup> | 6.41  | 1.4×10 <sup>-10</sup> | -3.45  | 5.5×10 <sup>-4</sup>  |
| 6p21.32        | ENSG00000204301 | <i>NOTCH4</i>            | -3.93 | 8.4×10 <sup>-5</sup> | 4.70  | 2.6×10 <sup>-6</sup>  | 0.84   | 0.40                  |
| 6p21.32        | ENSG00000204308 | <i>RNF5</i>              | 3.66  | 2.5×10 <sup>-4</sup> | 5.59  | 2.3×10 <sup>-8</sup>  | 5.96   | 2.5×10 <sup>-9</sup>  |
| 6p21.33        | ENSG00000204516 | <i>MICB</i>              | -3.62 | 3.0×10 <sup>-4</sup> | 2.97  | 3.0×10 <sup>-3</sup>  | -8.06  | 7.4×10 <sup>-16</sup> |
| EBV p18 6p22.1 | ENSG00000233822 | <i>HIST1H2BN</i>         | 3.36  | 7.8×10 <sup>-4</sup> | 0.83  | 0.41                  | 4.69   | 2.8×10 <sup>-6</sup>  |
| 6p21.32        | ENSG00000204267 | <i>TAP2</i>              | -3.09 | 2.0×10 <sup>-3</sup> | -4.22 | 2.4×10 <sup>-5</sup>  | -4.09  | 4.2×10 <sup>-5</sup>  |
| 6p21.33        | ENSG00000204387 | <i>C6orf48</i>           | 3.04  | 2.3×10 <sup>-3</sup> | 3.78  | 1.5×10 <sup>-4</sup>  | 4.85   | 1.2×10 <sup>-6</sup>  |
| 6p21.33        | ENSG00000204482 | <i>LST1</i>              | 3.00  | 2.7×10 <sup>-3</sup> | -     | -                     | -4.52  | 6.1×10 <sup>-6</sup>  |
| 6p21.33        | ENSG00000204520 | <i>MICA</i>              | 2.52  | 0.012                | 1.90  | 0.057                 | 5.60   | 2.1×10 <sup>-8</sup>  |
| 6p21.33        | ENSG00000272221 | <i>XXbac-BPG181B23.7</i> | 2.09  | 0.037                | 4.52  | 6.1×10 <sup>-6</sup>  | -0.37  | 0.71                  |
| 6p21.32        | ENSG00000204228 | <i>HSD17B8</i>           | 1.87  | 0.062                | 4.81  | 1.5×10 <sup>-6</sup>  | 2.47   | 0.014                 |
| 5q31.1         | ENSG00000164402 | <i>SEPTIN8</i>           | 1.65  | 0.098                | 4.42  | 9.9×10 <sup>-6</sup>  | -1.95  | 0.051                 |
| 6p21.32        | ENSG00000204252 | <i>HLA-DOA</i>           | -1.34 | 0.18                 | 6.56  | 5.5×10 <sup>-11</sup> | -1.13  | 0.26                  |
| 6p22.2         | ENSG00000111801 | <i>BTN3A3</i>            | -0.93 | 0.35                 | -4.68 | 2.8×10 <sup>-6</sup>  | 0.25   | 0.80                  |
| 6p21.32        | ENSG00000242574 | <i>HLA-DMB</i>           | -0.87 | 0.38                 | -4.40 | 1.1×10 <sup>-5</sup>  | -3.24  | 1.2×10 <sup>-3</sup>  |
| 6p21.33        | ENSG00000204472 | <i>AIF1</i>              | 0.86  | 0.39                 | -3.01 | 2.6×10 <sup>-3</sup>  | -4.21  | 2.6×10 <sup>-5</sup>  |
| 6p21.32        | ENSG00000204314 | <i>PRRT1</i>             | 0.68  | 0.50                 | -     | -                     | -5.91  | 3.5×10 <sup>-9</sup>  |
| 6p21.33        | ENSG00000226979 | <i>LTA</i>               | -0.65 | 0.51                 | -6.72 | 1.8×10 <sup>-11</sup> | -6.64  | 3.1×10 <sup>-11</sup> |
| 6p22.1         | ENSG00000198315 | <i>ZKSCAN8</i>           | 0.62  | 0.53                 | 5.15  | 2.7×10 <sup>-7</sup>  | -0.01  | 1.00                  |
| 6p21.32        | ENSG00000204248 | <i>COL11A2</i>           | -0.60 | 0.55                 | 4.15  | 3.3×10 <sup>-5</sup>  | 1.64   | 0.10                  |
| 6p21.32        | ENSG00000196735 | <i>HLA-DQA1</i>          | 0.50  | 0.62                 | 6.81  | 1.0×10 <sup>-11</sup> | 1.01   | 0.31                  |
| 6p21.33        | ENSG00000232810 | <i>TNF</i>               | 0.48  | 0.63                 | 0.48  | 0.63                  | -10.43 | 1.8×10 <sup>-25</sup> |
| 22q13.1        | ENSG00000278195 | <i>SSTR3</i>             | 0.23  | 0.82                 | -4.70 | 2.6×10 <sup>-6</sup>  | 1.23   | 0.22                  |
| 6p21.33        | ENSG00000204531 | <i>POU5F1</i>            | -     | -                    | -5.64 | 1.7×10 <sup>-8</sup>  | -5.84  | 5.2×10 <sup>-9</sup>  |

|           |                 |                 |                  |                      |                       |                      |                       |                      |                       |
|-----------|-----------------|-----------------|------------------|----------------------|-----------------------|----------------------|-----------------------|----------------------|-----------------------|
| EBV p18   | 6p21.33         | ENSG00000228022 | <i>HCG20</i>     | -                    | -                     | 5.10                 | $3.4 \times 10^{-7}$  | 5.70                 | $1.2 \times 10^{-8}$  |
|           | 6p21.33         | ENSG00000204389 | <i>HSPA1A</i>    | -                    | -                     | -                    | -                     | 5.65                 | $1.6 \times 10^{-8}$  |
|           | 6p22.1          | ENSG00000184357 | <i>HIST1H1B</i>  | -                    | -                     | -                    | -                     | -4.85                | $1.2 \times 10^{-6}$  |
|           | 6p21.33         | ENSG00000137337 | <i>MDC1</i>      | -                    | -                     | -                    | -                     | 4.76                 | $1.9 \times 10^{-6}$  |
|           | 6p21.33         | ENSG00000204540 | <i>PSORS1C1</i>  | -                    | -                     | 4.99                 | $6.0 \times 10^{-7}$  | 4.15                 | $3.3 \times 10^{-5}$  |
|           | 6p21.33         | ENSG00000168631 | <i>DPCR1</i>     | -                    | -                     | -                    | -                     | 4.10                 | $4.1 \times 10^{-5}$  |
|           | 6p21.33         | ENSG00000228789 | <i>HCG22</i>     | -                    | -                     | -4.33                | $1.5 \times 10^{-5}$  | 3.03                 | $2.4 \times 10^{-3}$  |
|           | 6p21.32         | ENSG00000196126 | <i>HLA-DRB1</i>  | -                    | -                     | 7.02                 | $2.2 \times 10^{-12}$ | -                    | -                     |
|           | 6p21.32         | ENSG00000232629 | <i>HLA-DQB2</i>  | 8.87                 | $7.6 \times 10^{-19}$ | 8.54                 | $1.4 \times 10^{-17}$ | 5.29                 | $1.3 \times 10^{-7}$  |
|           | 6p21.32         | ENSG00000179344 | <i>HLA-DQB1</i>  | -8.56                | $1.1 \times 10^{-17}$ | 1.04                 | 0.30                  | -11.40               | $4.1 \times 10^{-30}$ |
|           | 6p21.32         | ENSG00000204257 | <i>HLA-DMA</i>   | -7.28                | $3.4 \times 10^{-13}$ | -7.45                | $9.5 \times 10^{-14}$ | 7.32                 | $2.6 \times 10^{-13}$ |
|           | 6p21.33         | ENSG00000214894 | <i>LINC00243</i> | -6.89                | $5.6 \times 10^{-12}$ | -                    | -                     | -0.22                | 0.82                  |
|           | 6p21.33         | ENSG00000244731 | <i>C4A</i>       | 6.80                 | $1.1 \times 10^{-11}$ | 6.46                 | $1.0 \times 10^{-10}$ | 6.54                 | $6.0 \times 10^{-11}$ |
|           | 6p21.33         | ENSG00000166278 | <i>C2</i>        | -6.42                | $1.4 \times 10^{-10}$ | -                    | -                     | -                    | -                     |
|           | 6p21.33         | ENSG00000204386 | <i>NEU1</i>      | 6.39                 | $1.6 \times 10^{-10}$ | -                    | -                     | -2.35                | 0.019                 |
|           | 6p21.33         | ENSG00000213719 | <i>CLIC1</i>     | 6.20                 | $5.6 \times 10^{-10}$ | 6.20                 | $5.6 \times 10^{-10}$ | -0.45                | 0.65                  |
|           | 6p21.33         | ENSG00000224389 | <i>C4B</i>       | -6.17                | $7.0 \times 10^{-10}$ | -                    | -                     | -                    | -                     |
|           | 6p21.33         | ENSG00000231852 | <i>CYP21A2</i>   | -6.16                | $7.5 \times 10^{-10}$ | -                    | -                     | -                    | -                     |
|           | 6p21.33         | ENSG00000204444 | <i>APOM</i>      | 6.13                 | $8.6 \times 10^{-10}$ | 5.97                 | $2.3 \times 10^{-9}$  | 6.18                 | $6.6 \times 10^{-10}$ |
|           | 6p21.33         | ENSG00000228727 | <i>SAPCD1</i>    | -6.06                | $1.4 \times 10^{-9}$  | -1.18                | 0.24                  | -6.06                | $1.4 \times 10^{-9}$  |
|           | 6p21.33         | ENSG00000146112 | <i>PPP1R18</i>   | -5.71                | $1.1 \times 10^{-8}$  | 0.84                 | 0.40                  | -5.77                | $8.1 \times 10^{-9}$  |
|           | 6p21.33         | ENSG00000204351 | <i>SKIV2L</i>    | 5.70                 | $1.2 \times 10^{-8}$  | 5.76                 | $8.2 \times 10^{-9}$  | 6.13                 | $8.7 \times 10^{-10}$ |
|           | 6p21.33         | ENSG00000204396 | <i>VWA7</i>      | 5.49                 | $4.0 \times 10^{-8}$  | -4.62                | $3.9 \times 10^{-6}$  | 4.31                 | $1.6 \times 10^{-5}$  |
| EBV ZEBRA | 6p21.33         | ENSG00000204392 | <i>LSM2</i>      | -5.43                | $5.7 \times 10^{-8}$  | -5.01                | $5.4 \times 10^{-7}$  | -5.01                | $5.4 \times 10^{-7}$  |
|           | 6p21.33         | ENSG00000227507 | <i>LTB</i>       | 5.28                 | $1.3 \times 10^{-7}$  | -                    | -                     | -                    | -                     |
|           | 6p21.33         | ENSG00000204388 | <i>HSPA1B</i>    | -5.27                | $1.4 \times 10^{-7}$  | -                    | -                     | -2.17                | 0.030                 |
|           | 6p21.33         | ENSG00000204564 | <i>C6orf136</i>  | 5.06                 | $4.1 \times 10^{-7}$  | 0.38                 | 0.70                  | 5.05                 | $4.4 \times 10^{-7}$  |
|           | 6p21.32         | ENSG00000204315 | <i>FKBPL</i>     | 5.03                 | $4.9 \times 10^{-7}$  | -0.60                | 0.55                  | -                    | -                     |
|           | 6p21.32         | ENSG00000204252 | <i>HLA-DOA</i>   | -4.98                | $6.5 \times 10^{-7}$  | 1.48                 | 0.14                  | -4.95                | $7.5 \times 10^{-7}$  |
|           | 6p21.33         | ENSG00000204536 | <i>CCHCR1</i>    | -4.96                | $7.0 \times 10^{-7}$  | -5.72                | $1.1 \times 10^{-8}$  | -1.37                | 0.17                  |
|           | 6p21.33         | ENSG00000204463 | <i>BAG6</i>      | -4.86                | $1.2 \times 10^{-6}$  | 0.80                 | 0.42                  | 1.20                 | 0.23                  |
|           | 6p22.1          | ENSG00000204592 | <i>HLA-E</i>     | -4.66                | $3.2 \times 10^{-6}$  | -4.66                | $3.2 \times 10^{-6}$  | -4.66                | $3.2 \times 10^{-6}$  |
|           | 6p22.1          | ENSG00000204613 | <i>TRIM10</i>    | 4.60                 | $4.2 \times 10^{-6}$  | -                    | -                     | -                    | -                     |
|           | 6p21.33         | ENSG00000204525 | <i>HLA-C</i>     | -4.60                | $4.3 \times 10^{-6}$  | 1.19                 | 0.23                  | -5.39                | $7.1 \times 10^{-8}$  |
|           | 6p21.32         | ENSG00000196735 | <i>HLA-DQA1</i>  | -4.57                | $5.0 \times 10^{-6}$  | -6.72                | $1.8 \times 10^{-11}$ | -4.09                | $4.4 \times 10^{-5}$  |
|           | 22q11.21        | ENSG00000185608 | <i>MRPL40</i>    | 4.49                 | $7.1 \times 10^{-6}$  | 3.96                 | $7.5 \times 10^{-5}$  | 4.48                 | $7.5 \times 10^{-6}$  |
|           | 4q24            | ENSG00000109320 | <i>NFKB1</i>     | -4.37                | $1.2 \times 10^{-5}$  | 3.88                 | $1.1 \times 10^{-4}$  | 0.94                 | 0.35                  |
|           | 6p21.33         | ENSG00000204394 | <i>VARS</i>      | 4.32                 | $1.5 \times 10^{-5}$  | 0.44                 | 0.66                  | 0.44                 | 0.66                  |
|           | 6p22.1          | ENSG00000281831 | <i>HCP5B</i>     | -4.29                | $1.8 \times 10^{-5}$  | -5.24                | $1.6 \times 10^{-7}$  | -4.40                | $1.1 \times 10^{-5}$  |
| 6p21.32   | ENSG00000241404 | <i>EGFL8</i>    | -4.26            | $2.0 \times 10^{-5}$ | -2.58                 | $9.8 \times 10^{-3}$ | -4.90                 | $9.6 \times 10^{-7}$ |                       |

EBV  
ZEBRA

|         |                 |                     |       |                      |        |                       |        |                       |   |
|---------|-----------------|---------------------|-------|----------------------|--------|-----------------------|--------|-----------------------|---|
| 6p22.1  | ENSG00000204625 | <i>HCG9</i>         | -4.16 | 3.1×10 <sup>-5</sup> | -      | -                     | -      | -                     | - |
| 6p21.33 | ENSG00000204356 | <i>NELFE</i>        | -4.14 | 3.4×10 <sup>-5</sup> | 0.77   | 0.44                  | -      | -                     | - |
| 6p22.1  | ENSG00000158691 | <i>ZSCAN12</i>      | 4.10  | 4.1×10 <sup>-5</sup> | -0.49  | 0.63                  | 3.19   | 1.4×10 <sup>-3</sup>  |   |
| 6p21.33 | ENSG00000204428 | <i>LY6G5C</i>       | -3.48 | 5.1×10 <sup>-4</sup> | -3.48  | 5.1×10 <sup>-4</sup>  | -6.49  | 8.8×10 <sup>-11</sup> |   |
| 6p22.1  | ENSG00000204619 | <i>PPP1R11</i>      | 3.39  | 7.1×10 <sup>-4</sup> | 0.08   | 0.94                  | 5.08   | 3.8×10 <sup>-7</sup>  |   |
| 6p21.33 | ENSG00000204438 | <i>GPANK1</i>       | 2.81  | 4.9×10 <sup>-3</sup> | 2.21   | 0.027                 | 4.36   | 1.3×10 <sup>-5</sup>  |   |
| 6p21.32 | ENSG00000242574 | <i>HLA-DMB</i>      | 2.70  | 6.9×10 <sup>-3</sup> | -7.33  | 2.3×10 <sup>-13</sup> | 0.72   | 0.47                  |   |
| 6p21.32 | ENSG00000204261 | <i>PSMB8-AS1</i>    | -2.67 | 7.6×10 <sup>-3</sup> | 2.36   | 0.018                 | 4.26   | 2.0×10 <sup>-5</sup>  |   |
| 6p21.32 | ENSG00000204267 | <i>TAP2</i>         | -2.21 | 0.027                | -4.76  | 2.0×10 <sup>-6</sup>  | -3.92  | 9.0×10 <sup>-5</sup>  |   |
| 6p21.33 | ENSG00000226979 | <i>LTA</i>          | 2.05  | 0.040                | -6.15  | 7.6×10 <sup>-10</sup> | -5.29  | 1.3×10 <sup>-7</sup>  |   |
| 6p22.1  | ENSG00000198315 | <i>ZKSCAN8</i>      | 2.00  | 0.046                | 4.54   | 5.7×10 <sup>-6</sup>  | -0.78  | 0.44                  |   |
| 6p21.32 | ENSG00000231389 | <i>HLA-DPA1</i>     | 1.75  | 0.079                | 5.52   | 3.5×10 <sup>-8</sup>  | 2.44   | 0.015                 |   |
| 6p21.33 | ENSG00000204482 | <i>LST1</i>         | 1.53  | 0.13                 | -      | -                     | -6.81  | 1.0×10 <sup>-11</sup> |   |
| 6p21.33 | ENSG00000213760 | <i>ATP6V1G2</i>     | 1.44  | 0.15                 | 4.23   | 2.4×10 <sup>-5</sup>  | 2.55   | 0.011                 |   |
| 6p21.33 | ENSG00000204435 | <i>CSNK2B</i>       | -1.25 | 0.21                 | 4.91   | 9.3×10 <sup>-7</sup>  | -3.55  | 3.9×10 <sup>-4</sup>  |   |
| 6p21.33 | ENSG00000204410 | <i>MSH5</i>         | -0.82 | 0.41                 | 5.67   | 1.4×10 <sup>-8</sup>  | -0.02  | 0.98                  |   |
| 6p21.32 | ENSG00000221988 | <i>PPT2</i>         | -0.59 | 0.55                 | 4.90   | 9.6×10 <sup>-7</sup>  | -3.68  | 2.3×10 <sup>-4</sup>  |   |
| 6p21.33 | ENSG00000137312 | <i>FLOT1</i>        | 0.54  | 0.59                 | -5.77  | 8.1×10 <sup>-9</sup>  | -1.41  | 0.16                  |   |
| 6p21.32 | ENSG00000198502 | <i>HLA-DRB5</i>     | -     | -                    | -      | -                     | -14.09 | 4.2×10 <sup>-45</sup> |   |
| 6p21.32 | ENSG00000204287 | <i>HLA-DRA</i>      | -     | -                    | -      | -                     | 8.48   | 2.2×10 <sup>-17</sup> |   |
| 6p21.33 | ENSG00000204531 | <i>POU5F1</i>       | -     | -                    | 0.64   | 0.52                  | -6.11  | 9.9×10 <sup>-10</sup> |   |
| 6p21.33 | ENSG00000204574 | <i>ABCF1</i>        | -     | -                    | -      | -                     | -5.74  | 9.3×10 <sup>-9</sup>  |   |
| 6p21.33 | ENSG00000204540 | <i>PSORS1C1</i>     | -     | -                    | 6.24   | 4.4×10 <sup>-10</sup> | 5.25   | 1.5×10 <sup>-7</sup>  |   |
| 6p21.32 | ENSG00000168394 | <i>TAP1</i>         | -     | -                    | -2.30  | 0.022                 | 4.76   | 2.0×10 <sup>-6</sup>  |   |
| 6p21.33 | ENSG00000228022 | <i>HCG20</i>        | -     | -                    | 5.05   | 4.4×10 <sup>-7</sup>  | 3.92   | 8.9×10 <sup>-5</sup>  |   |
| 6p21.32 | ENSG00000196126 | <i>HLA-DRB1</i>     | -     | -                    | -12.01 | 3.3×10 <sup>-33</sup> | -      | -                     |   |
| 6p22.1  | ENSG00000271755 | <i>RP1-153G14.4</i> | -     | -                    | 4.16   | 3.2×10 <sup>-5</sup>  | -      | -                     |   |

**Supplementary Table 17:** TWAS results for MCV antigen response using gene expression models based on whole blood, brain, and skin tissues. Associations with  $P_{TWAS} < 4.2 \times 10^{-6}$  are considered statistically significant and genes with  $P_{TWAS} < 4.5 \times 10^{-5}$  are considered suggestive.

| Region  | Gene ID         | Gene            | Whole Blood |                      | Brain (Frontal Cortex) |                       | Skin (Sun Exposed) |                       | Skin (Sun Unexposed) |                       |
|---------|-----------------|-----------------|-------------|----------------------|------------------------|-----------------------|--------------------|-----------------------|----------------------|-----------------------|
|         |                 |                 | Z           | $P_{TWAS}$           | Z                      | $P_{TWAS}$            | Z                  | $P_{TWAS}$            | Z                    | $P_{TWAS}$            |
| 6p21.33 | ENSG00000204396 | <i>VWA7</i>     | -5.89       | $4.0 \times 10^{-9}$ | 5.42                   | $6.0 \times 10^{-8}$  | -4.91              | $9.0 \times 10^{-7}$  | -4.85                | $1.2 \times 10^{-6}$  |
| 6p21.33 | ENSG00000204371 | <i>EHMT2</i>    | -5.88       | $4.0 \times 10^{-9}$ | -                      | -                     | -2.68              | $7.5 \times 10^{-3}$  | -2.66                | $7.9 \times 10^{-3}$  |
| 6p21.33 | ENSG00000204564 | <i>C6orf136</i> | -5.76       | $8.2 \times 10^{-9}$ | -0.97                  | 0.33                  | -2.75              | $6.0 \times 10^{-3}$  | -2.58                | $9.9 \times 10^{-3}$  |
| 6p21.33 | ENSG00000213722 | <i>DDAH2</i>    | -5.68       | $1.4 \times 10^{-8}$ | -1.49                  | 0.14                  | -3.94              | $8.2 \times 10^{-5}$  | -                    | -                     |
| 5q31.2  | ENSG00000170464 | <i>DNAJC18</i>  | 4.82        | $1.5 \times 10^{-6}$ | 6.07                   | $1.3 \times 10^{-9}$  | 3.39               | $6.9 \times 10^{-4}$  | 3.40                 | $6.7 \times 10^{-4}$  |
| 6p21.33 | ENSG00000227507 | <i>LTB</i>      | -4.72       | $2.3 \times 10^{-6}$ | -                      | -                     | -                  | -                     | -                    | -                     |
| 5q31.2  | ENSG00000228672 | <i>PROB1</i>    | -4.64       | $3.6 \times 10^{-6}$ | -3.29                  | $1.0 \times 10^{-3}$  | -                  | -                     | -6.75                | $1.5 \times 10^{-11}$ |
| 6p21.33 | ENSG00000204388 | <i>HSPA1B</i>   | -4.48       | $7.4 \times 10^{-6}$ | -                      | -                     | -                  | -                     | -                    | -                     |
| 6p22.1  | ENSG00000204599 | <i>TRIM39</i>   | -4.36       | $1.3 \times 10^{-5}$ | -0.43                  | 0.67                  | 0.20               | 0.84                  | -0.11                | 0.91                  |
| 5q31.2  | ENSG00000170482 | <i>SLC23A1</i>  | -4.34       | $1.4 \times 10^{-5}$ | -4.07                  | $4.7 \times 10^{-5}$  | 4.39               | $1.1 \times 10^{-5}$  | 4.07                 | $4.7 \times 10^{-5}$  |
| 5q31.2  | ENSG00000170469 | <i>SPATA24</i>  | 4.20        | $2.7 \times 10^{-5}$ | -                      | -                     | 4.30               | $1.7 \times 10^{-5}$  | 4.29                 | $1.8 \times 10^{-5}$  |
| 6p22.1  | ENSG00000204632 | <i>HLA-G</i>    | 4.11        | $3.9 \times 10^{-5}$ | -1.45                  | 0.15                  | 0.19               | 0.85                  | 0.11                 | 0.92                  |
| 5q31.2  | ENSG00000184584 | <i>TMEM173</i>  | -4.08       | $4.5 \times 10^{-5}$ | -4.28                  | $1.9 \times 10^{-5}$  | -4.17              | $3.0 \times 10^{-5}$  | -4.20                | $2.6 \times 10^{-5}$  |
| 6p21.32 | ENSG00000241106 | <i>HLA-DOB</i>  | -3.84       | $1.2 \times 10^{-4}$ | -5.30                  | $1.2 \times 10^{-7}$  | -3.59              | $3.3 \times 10^{-4}$  | -4.73                | $2.3 \times 10^{-6}$  |
| 6p22.1  | ENSG00000204619 | <i>PPP1R11</i>  | -3.46       | $5.4 \times 10^{-4}$ | 0.64                   | 0.52                  | 4.21               | $2.5 \times 10^{-5}$  | 4.20                 | $2.7 \times 10^{-5}$  |
| 6p21.32 | ENSG00000204267 | <i>TAP2</i>     | 3.32        | $9.1 \times 10^{-4}$ | 3.11                   | $1.9 \times 10^{-3}$  | 5.52               | $3.4 \times 10^{-8}$  | 3.18                 | $1.5 \times 10^{-3}$  |
| 6p21.33 | ENSG00000226979 | <i>LTA</i>      | 2.94        | $3.3 \times 10^{-3}$ | 5.07                   | $4.0 \times 10^{-7}$  | 0.88               | 0.38                  | 1.33                 | 0.18                  |
| 6p21.32 | ENSG00000204314 | <i>PRRT1</i>    | -2.80       | $5.1 \times 10^{-3}$ | -                      | -                     | 5.75               | $9.2 \times 10^{-9}$  | 5.72                 | $1.1 \times 10^{-8}$  |
| 5q31.2  | ENSG00000249751 | <i>ECSCR</i>    | 2.38        | 0.018                | 7.83                   | $5.0 \times 10^{-15}$ | 7.25               | $4.2 \times 10^{-13}$ | 7.83                 | $5.0 \times 10^{-15}$ |
| 6p22.1  | ENSG00000234127 | <i>TRIM26</i>   | -2.24       | 0.025                | -1.64                  | 0.10                  | -6.21              | $5.3 \times 10^{-10}$ | -5.47                | $4.6 \times 10^{-8}$  |
| 6p21.33 | ENSG00000204498 | <i>NFKBIL1</i>  | -2.19       | 0.029                | -1.94                  | 0.052                 | -4.16              | $3.2 \times 10^{-5}$  | -3.32                | $9.0 \times 10^{-4}$  |
| 6p21.32 | ENSG00000204305 | <i>AGER</i>     | 0.91        | 0.36                 | 5.83                   | $5.6 \times 10^{-9}$  | 1.87               | 0.062                 | 0.28                 | 0.78                  |
| 5q31.2  | ENSG00000131508 | <i>UBE2D2</i>   | -           | -                    | 4.33                   | $1.5 \times 10^{-5}$  | -                  | -                     | -                    | -                     |



**Supplementary Table 18:** TWAS results for seropositivity using gene expression models based on whole blood, brain, and skin tissues. Only statistically significant associations with  $P_{\text{TWAS}} < 4.2 \times 10^{-6}$  are presented.

| Antigen                   | Region  | Gene ID         | Gene            | Whole Blood |                       | Brain (Frontal Cortex) |                       |
|---------------------------|---------|-----------------|-----------------|-------------|-----------------------|------------------------|-----------------------|
|                           |         |                 |                 | Z           | $P_{\text{TWAS}}$     | Z                      | $P_{\text{TWAS}}$     |
| EBV<br>EA-D <sup>1</sup>  | 6p21.33 | ENSG00000204388 | <i>HSPA1B</i>   | -6.33       | $2.5 \times 10^{-10}$ | -                      | -                     |
|                           | 6p21.33 | ENSG00000204371 | <i>EHMT2</i>    | -5.77       | $8.0 \times 10^{-9}$  | -                      | -                     |
|                           | 6p21.33 | ENSG00000244731 | <i>C4A</i>      | 5.58        | $2.4 \times 10^{-8}$  | 5.27                   | $1.4 \times 10^{-7}$  |
|                           | 6p21.33 | ENSG00000166278 | <i>C2</i>       | -4.88       | $1.0 \times 10^{-6}$  | -                      | -                     |
|                           | 6p21.33 | ENSG00000204469 | <i>PRRC2A</i>   | 4.84        | $1.3 \times 10^{-6}$  | -                      | -                     |
|                           | 6p21.33 | ENSG00000231852 | <i>CYP21A2</i>  | -4.78       | $1.7 \times 10^{-6}$  | -                      | -                     |
|                           | 6p21.33 | ENSG00000213719 | <i>CLIC1</i>    | 4.76        | $2.0 \times 10^{-6}$  | 4.76                   | $2.0 \times 10^{-6}$  |
|                           | 6p21.33 | ENSG00000224389 | <i>C4B</i>      | -4.76       | $2.0 \times 10^{-6}$  | -                      | -                     |
|                           | 6p21.33 | ENSG00000204386 | <i>NEU1</i>     | 4.75        | $2.1 \times 10^{-6}$  | -                      | -                     |
|                           | 6p22.3  | ENSG00000137177 | <i>KIF13A</i>   | -4.65       | $3.3 \times 10^{-6}$  | -                      | -                     |
|                           | 6p21.32 | ENSG00000196126 | <i>HLA-DRB1</i> | -           | -                     | -6.87                  | $6.4 \times 10^{-12}$ |
|                           | 6p21.32 | ENSG00000204305 | <i>AGER</i>     | -           | -                     | 5.77                   | $8.1 \times 10^{-9}$  |
|                           | 6p21.33 | ENSG00000204420 | <i>MPIG6B</i>   | -           | -                     | 4.71                   | $2.5 \times 10^{-6}$  |
|                           | 6p21.32 | ENSG00000213676 | <i>ATF6B</i>    | -           | -                     | 4.80                   | $1.6 \times 10^{-6}$  |
| EBV<br>EBNA <sup>1</sup>  | 6p21.32 | ENSG00000179344 | <i>HLA-DQB1</i> | 8.37        | $5.6 \times 10^{-17}$ | -                      | -                     |
|                           | 6p21.32 | ENSG00000232629 | <i>HLA-DQB2</i> | -8.10       | $5.7 \times 10^{-16}$ | -7.95                  | $1.9 \times 10^{-15}$ |
|                           | 6p21.32 | ENSG00000237541 | <i>HLA-DQA2</i> | -5.46       | $4.8 \times 10^{-8}$  | -                      | -                     |
|                           | 6p21.32 | ENSG00000196126 | <i>HLA-DRB1</i> | -           | -                     | 7.78                   | $7.0 \times 10^{-15}$ |
|                           | 6p21.32 | ENSG00000196735 | <i>HLA-DQA1</i> | -           | -                     | 6.91                   | $4.7 \times 10^{-12}$ |
|                           | 6p21.32 | ENSG00000204252 | <i>HLA-DOA</i>  | -           | -                     | 4.79                   | $1.7 \times 10^{-6}$  |
|                           | 6p21.32 | ENSG00000231389 | <i>HLA-DPA1</i> | -           | -                     | -5.20                  | $2.0 \times 10^{-7}$  |
| EBV<br>ZEBRA <sup>1</sup> | 6p21.33 | ENSG00000244731 | <i>C4A</i>      | 4.64        | $3.5 \times 10^{-6}$  | -                      | -                     |
|                           | 6p21.32 | ENSG00000196126 | <i>HLA-DRB1</i> | -           | -                     | -5.95                  | $2.7 \times 10^{-9}$  |
| VZV <sup>1</sup>          | 4p15.2  | ENSG00000109680 | <i>TBC1D19</i>  | -4.96       | $7.2 \times 10^{-7}$  | -                      | -                     |
| JCV                       | 6p21.32 | ENSG00000237541 | <i>HLA-DQA2</i> | 9.68        | $3.5 \times 10^{-22}$ | -                      | -                     |
|                           | 6p21.33 | ENSG00000204371 | <i>EHMT2</i>    | -9.30       | $1.4 \times 10^{-20}$ | -                      | -                     |
|                           | 6p21.32 | ENSG00000179344 | <i>HLA-DQB1</i> | -8.05       | $8.4 \times 10^{-16}$ | -                      | -                     |
|                           | 6p21.32 | ENSG00000232629 | <i>HLA-DQB2</i> | 7.98        | $1.5 \times 10^{-15}$ | 7.85                   | $4.3 \times 10^{-15}$ |
|                           | 6p21.32 | ENSG00000204305 | <i>AGER</i>     | 7.82        | $5.3 \times 10^{-15}$ | 10.39                  | $2.8 \times 10^{-25}$ |
|                           | 6p21.33 | ENSG00000213722 | <i>DDAH2</i>    | -7.46       | $8.5 \times 10^{-14}$ | -                      | -                     |
|                           | 6p21.32 | ENSG00000204310 | <i>AGPAT1</i>   | -6.80       | $1.0 \times 10^{-11}$ | 7.80                   | $6.0 \times 10^{-15}$ |
|                           | 6p21.32 | ENSG00000204308 | <i>RNF5</i>     | -6.13       | $9.0 \times 10^{-10}$ | -                      | -                     |
|                           | 6p21.33 | ENSG00000204396 | <i>VWA7</i>     | -5.64       | $1.7 \times 10^{-8}$  | 4.98                   | $6.4 \times 10^{-7}$  |
|                           | 6p21.33 | ENSG00000227507 | <i>LTB</i>      | -5.56       | $2.8 \times 10^{-8}$  | -                      | -                     |
|                           | 6p21.33 | ENSG00000204463 | <i>BAG6</i>     | 5.30        | $1.2 \times 10^{-7}$  | -                      | -                     |
|                           | 6p21.32 | ENSG00000196126 | <i>HLA-DRB1</i> | -           | -                     | -9.995                 | $1.6 \times 10^{-23}$ |

|  |         |                 |                  |       |                       |       |                       |
|--|---------|-----------------|------------------|-------|-----------------------|-------|-----------------------|
|  | 6p21.32 | ENSG00000196735 | <i>HLA-DQA1</i>  | -     | -                     | -5.73 | $9.8 \times 10^{-9}$  |
|  | 6p21.32 | ENSG00000204252 | <i>HLA-DOA</i>   | -     | -                     | -5.90 | $3.6 \times 10^{-9}$  |
|  | 6p21.32 | ENSG00000204261 | <i>PSMB8-AS1</i> | -     | -                     | -5.36 | $8.1 \times 10^{-8}$  |
|  | 6p21.32 | ENSG00000204264 | <i>PSMB8</i>     | -     | -                     | 5.71  | $1.2 \times 10^{-8}$  |
|  | 6p21.32 | ENSG00000204301 | <i>NOTCH4</i>    | -     | -                     | -5.85 | $5.0 \times 10^{-9}$  |
|  | 6p21.33 | ENSG00000213760 | <i>ATP6V1G2</i>  | -     | -                     | -4.98 | $6.2 \times 10^{-7}$  |
|  | 6p21.33 | ENSG00000226979 | <i>LTA</i>       | -     | -                     | 5.81  | $6.2 \times 10^{-9}$  |
|  | 6p21.33 | ENSG00000204371 | <i>EHMT2</i>     | -8.64 | $5.8 \times 10^{-18}$ | -     | -                     |
|  | 6p21.33 | ENSG00000213722 | <i>DDAH2</i>     | -8.49 | $2.2 \times 10^{-17}$ | -4.69 | $2.7 \times 10^{-6}$  |
|  | 6p21.33 | ENSG00000227507 | <i>LTB</i>       | -8.24 | $1.7 \times 10^{-16}$ | -     | -                     |
|  | 6p21.33 | ENSG00000204396 | <i>VWA7</i>      | -6.20 | $5.7 \times 10^{-10}$ | 5.40  | $6.7 \times 10^{-8}$  |
|  | 6p21.32 | ENSG00000204305 | <i>AGER</i>      | 5.27  | $1.4 \times 10^{-7}$  | 9.35  | $9.0 \times 10^{-21}$ |
|  | 6p21.32 | ENSG00000240065 | <i>PSMB9</i>     | 5.18  | $2.2 \times 10^{-7}$  | -     | -                     |
|  | 6p21.33 | ENSG00000146112 | <i>PPP1R18</i>   | 5.11  | $3.2 \times 10^{-7}$  | -     | -                     |
|  | 6p21.32 | ENSG00000241106 | <i>HLA-DOB</i>   | -4.75 | $2.0 \times 10^{-6}$  | -5.79 | $7.1 \times 10^{-9}$  |
|  | 6p21.32 | ENSG00000237541 | <i>HLA-DQA2</i>  | 4.72  | $2.3 \times 10^{-6}$  | -     | -                     |
|  | 6p21.32 | ENSG00000179344 | <i>HLA-DQB1</i>  | -     | -                     | -6.79 | $1.1 \times 10^{-11}$ |
|  | 6p21.32 | ENSG00000196126 | <i>HLA-DRB1</i>  | -     | -                     | -5.41 | $6.4 \times 10^{-8}$  |
|  | 6p21.32 | ENSG00000196735 | <i>HLA-DQA1</i>  | -     | -                     | -6.48 | $9.4 \times 10^{-11}$ |
|  | 6p21.32 | ENSG00000204310 | <i>AGPAT1</i>    | -     | -                     | 4.92  | $8.5 \times 10^{-7}$  |
|  | 6p21.33 | ENSG00000226979 | <i>LTA</i>       | -     | -                     | 8.84  | $9.9 \times 10^{-19}$ |
|  | 6p21.33 | ENSG00000228789 | <i>HCG22</i>     | -     | -                     | 5.40  | $6.5 \times 10^{-8}$  |
|  | 5q31.2  | ENSG00000249751 | <i>ECSCR</i>     | -     | -                     | 5.63  | $1.8 \times 10^{-8}$  |

MCV

**Supplementary Figure 1:** Manhattan plots visualizing genome-wide association results for continuous antibody response phenotypes (MFI z-score) and dichotomous seropositivity phenotypes for each antigen.

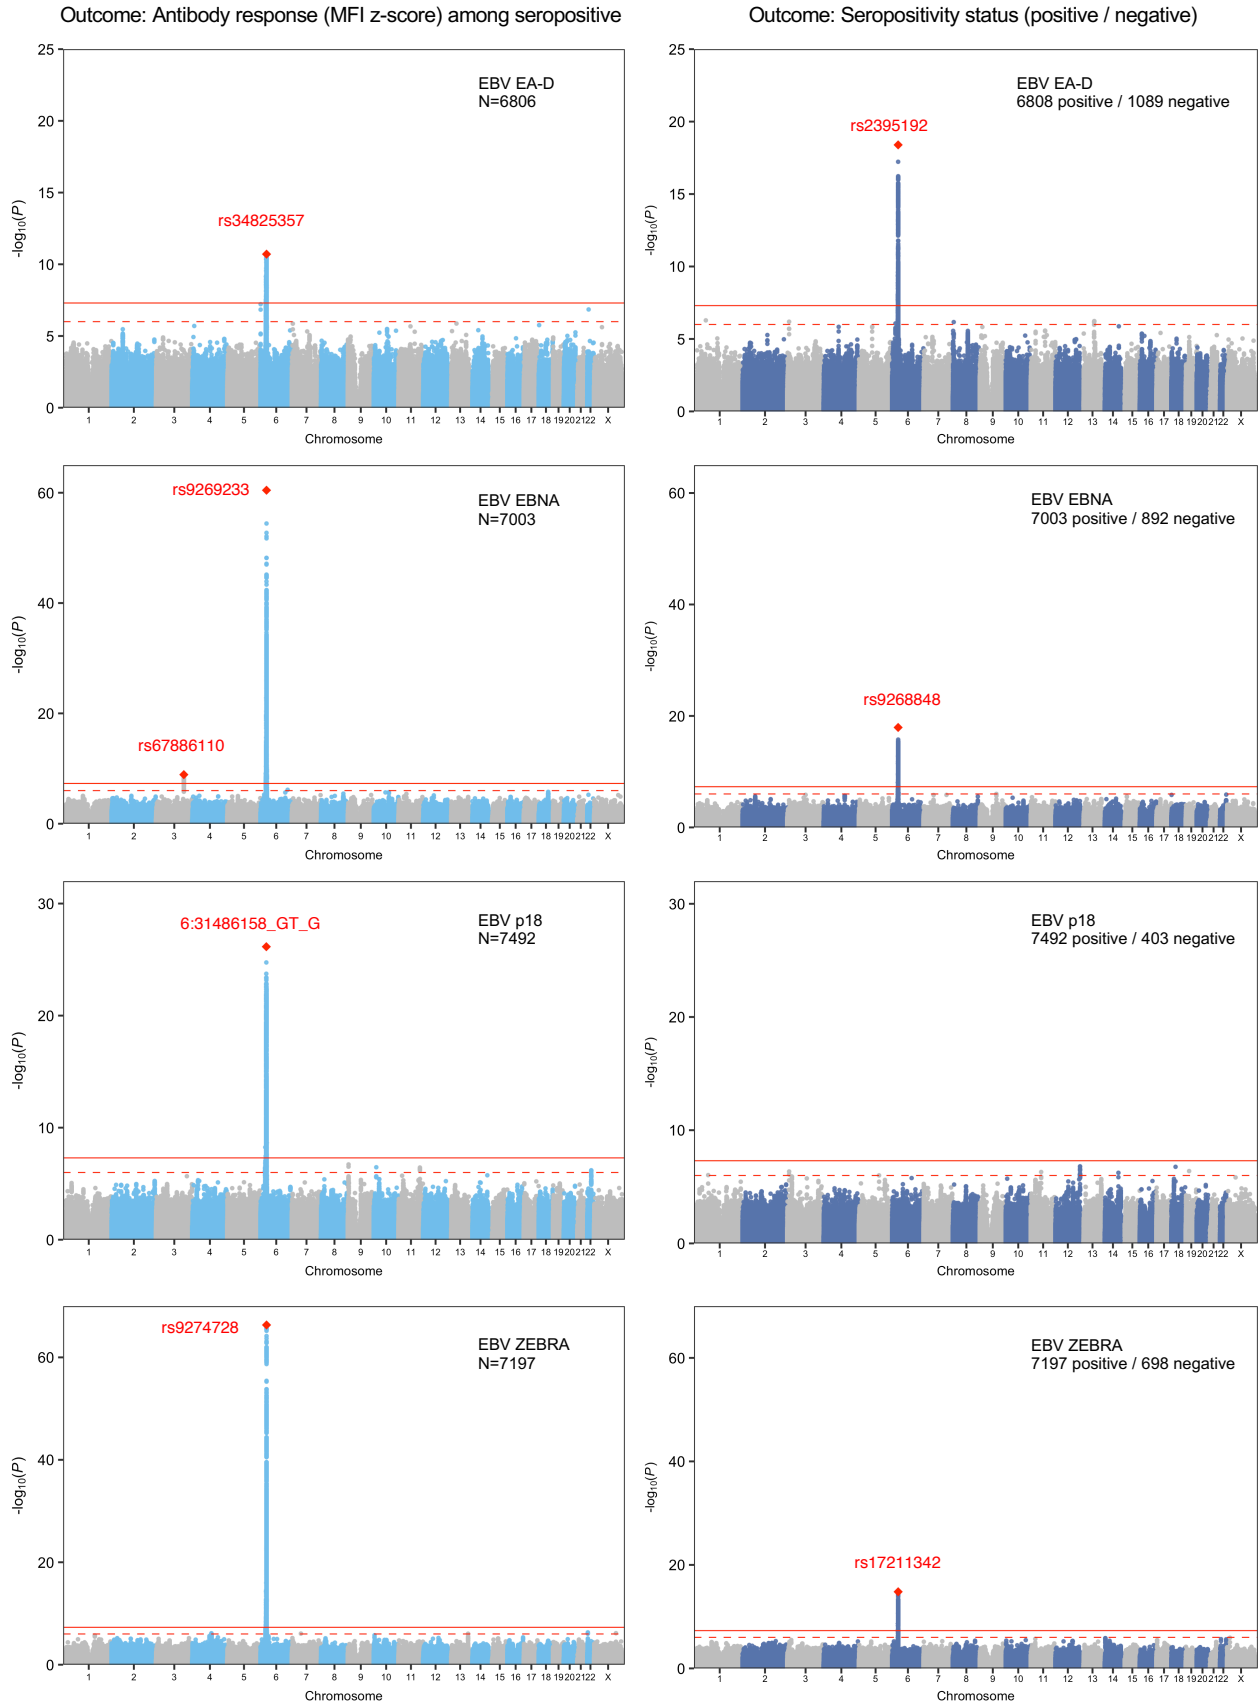

Outcome: Antibody response (MFI z-score) among seropositive

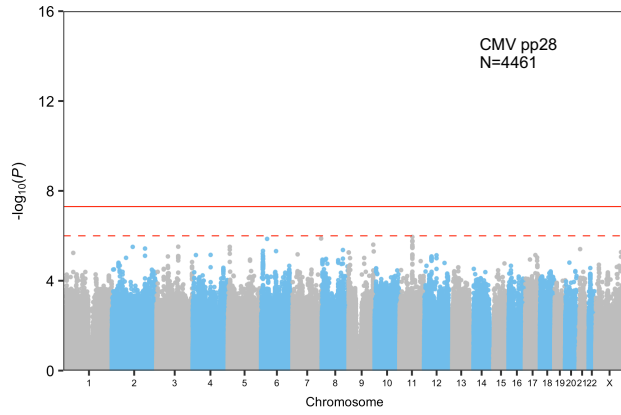

Outcome: Seropositivity status (positive / negative)

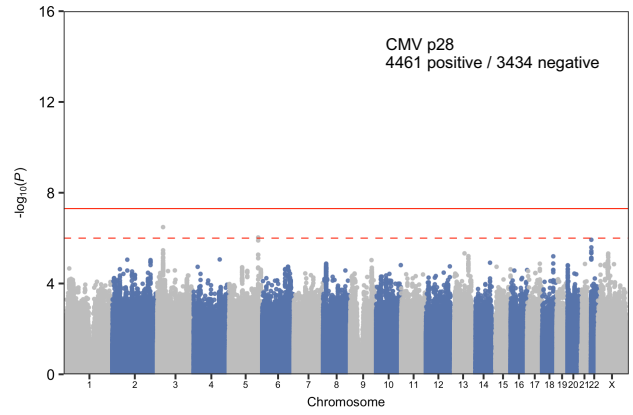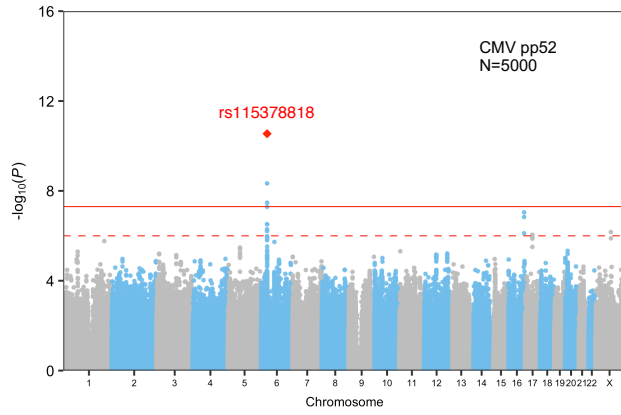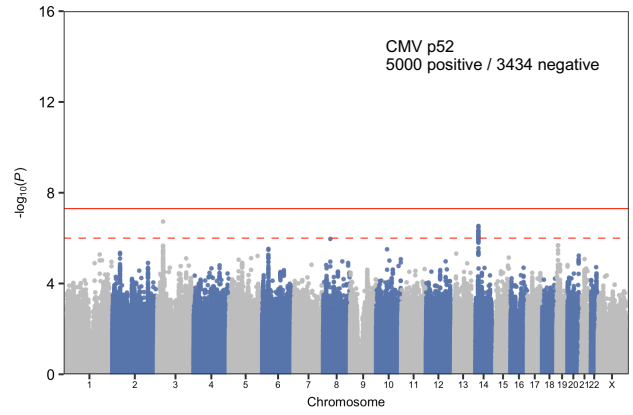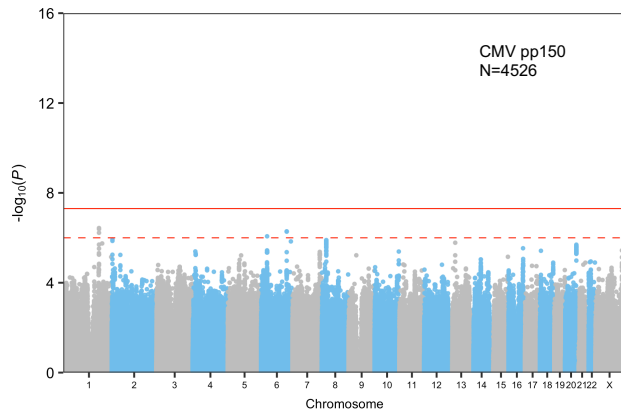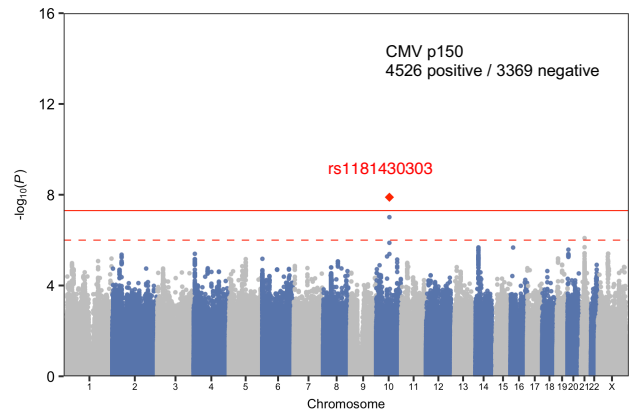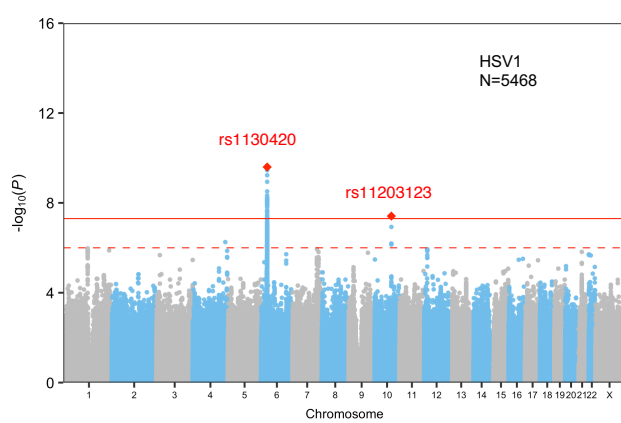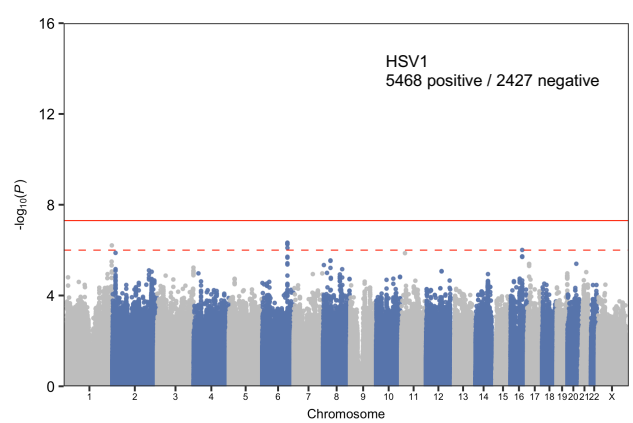

Outcome: Antibody response (MFI z-score) among seropositive

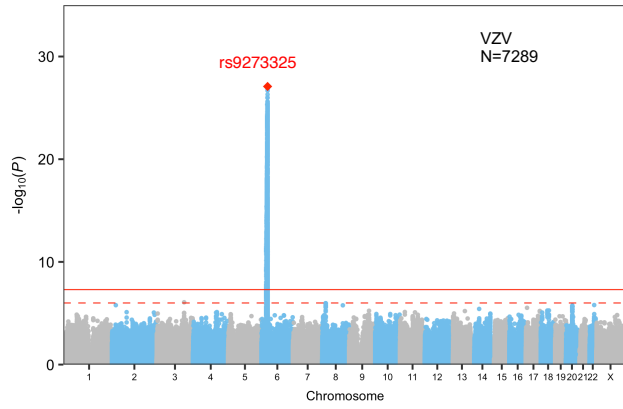

Outcome: Seropositivity status (positive / negative)

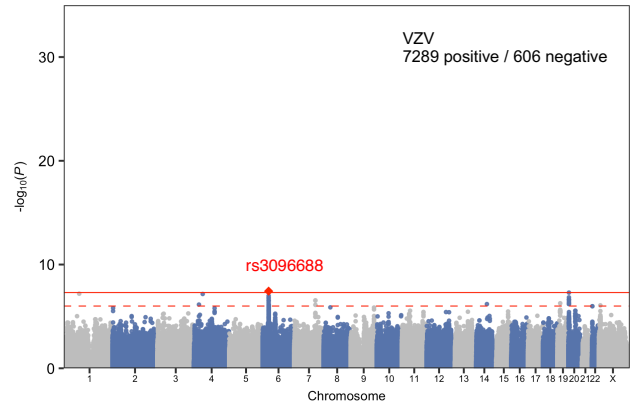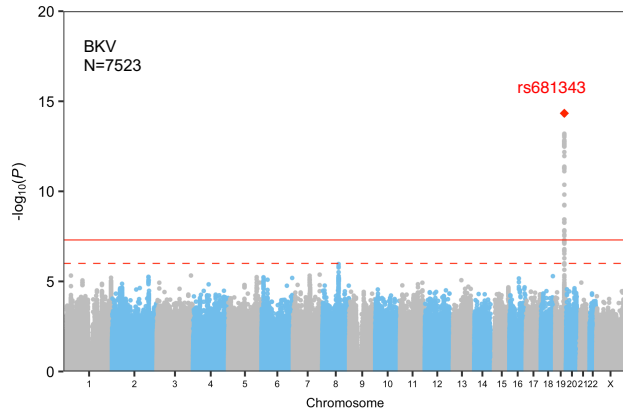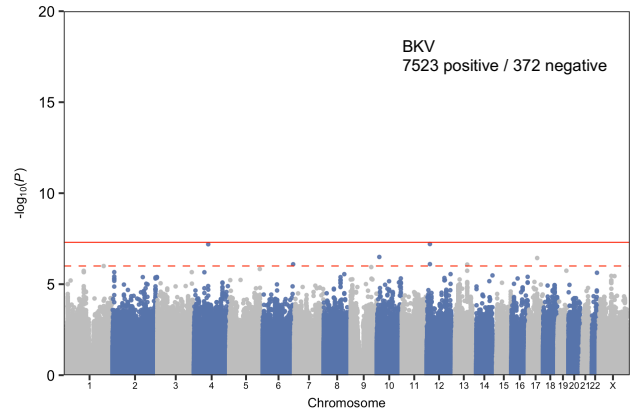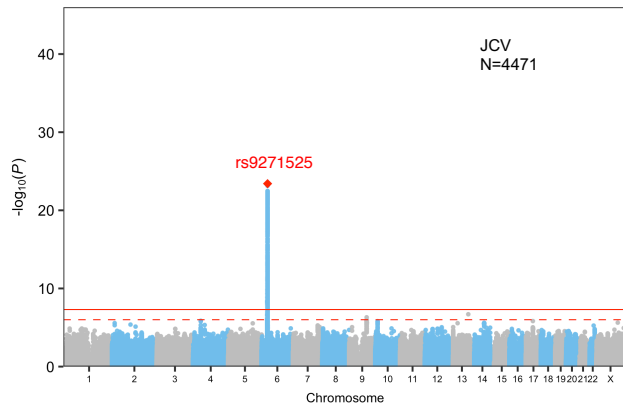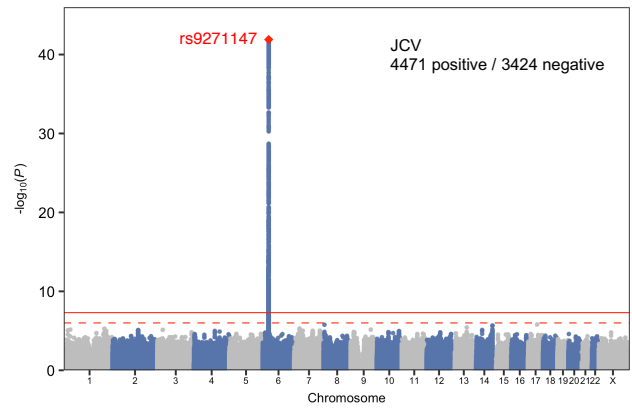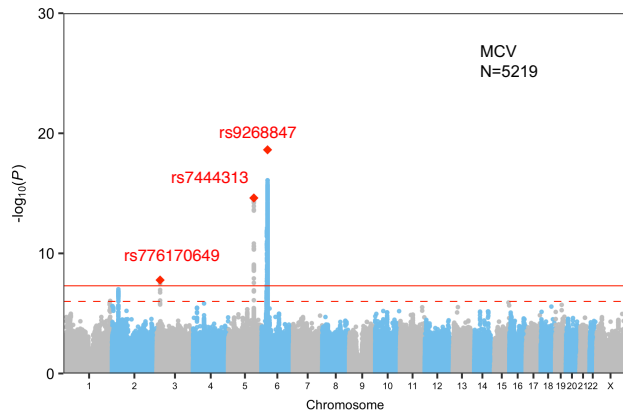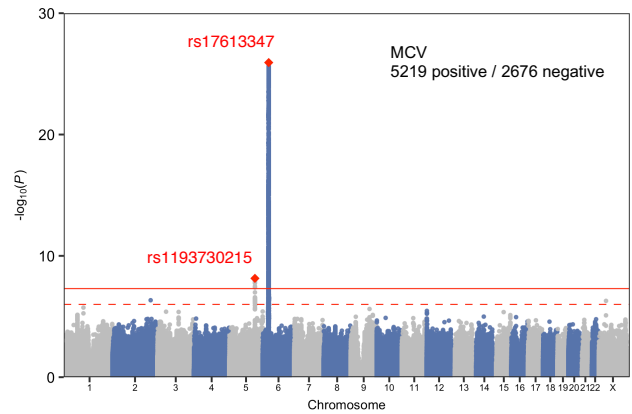

Outcome: Antibody response (MFI z-score) among seropositive

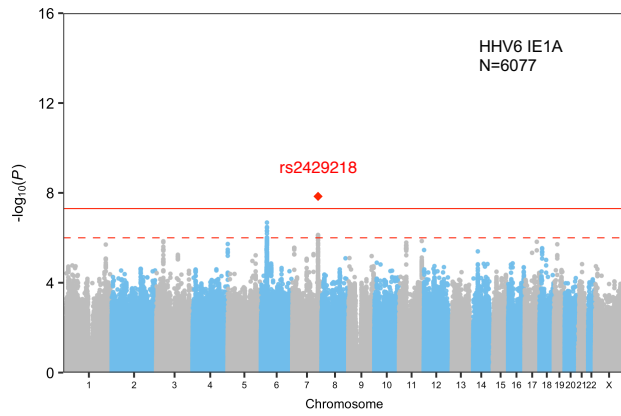

Outcome: Seropositivity status (positive / negative)

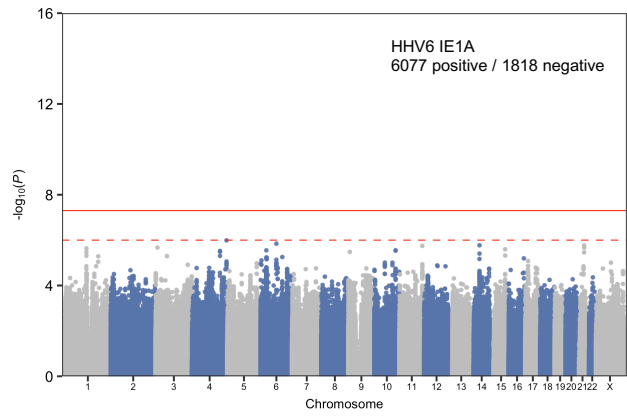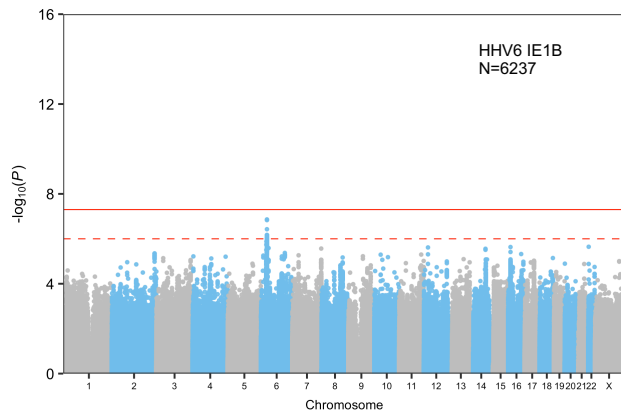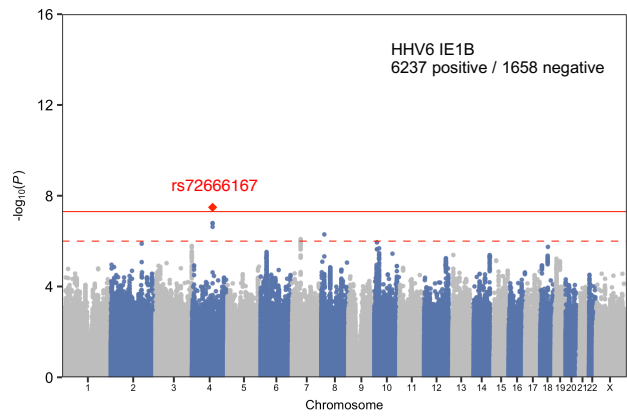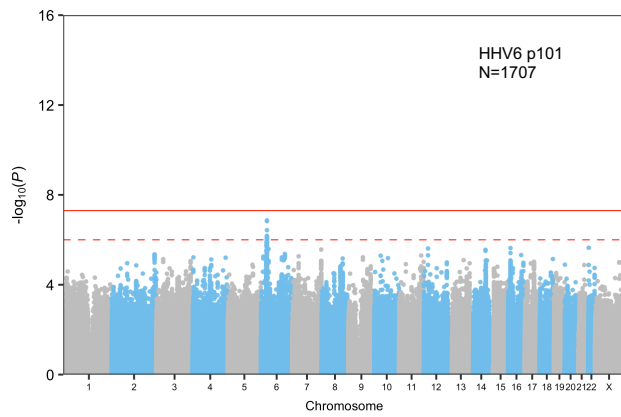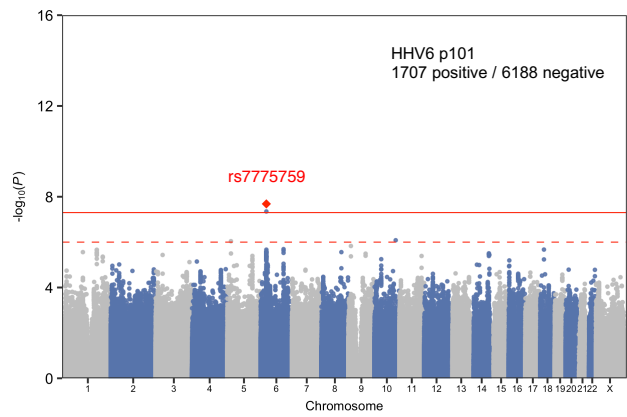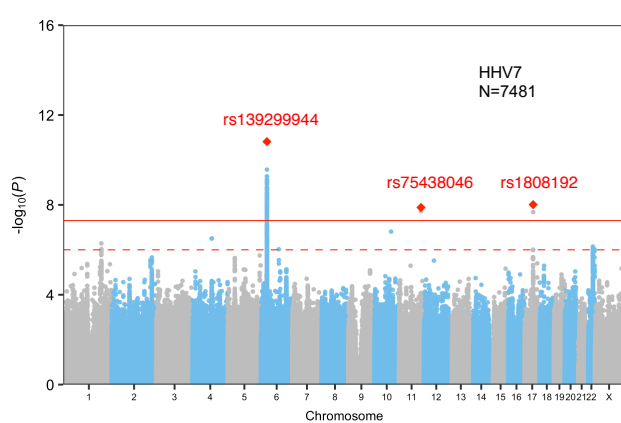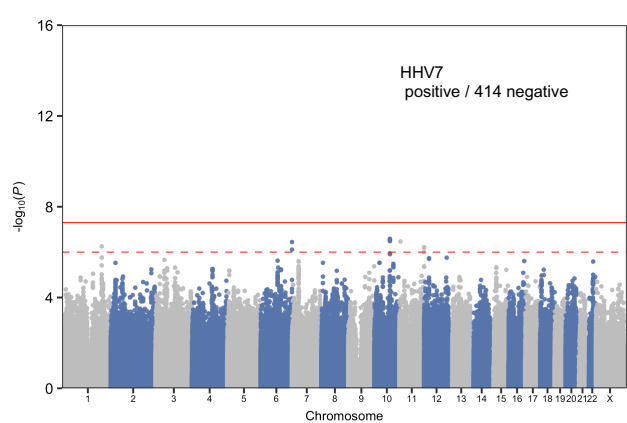

Outcome: Seropositivity status (positive / negative)

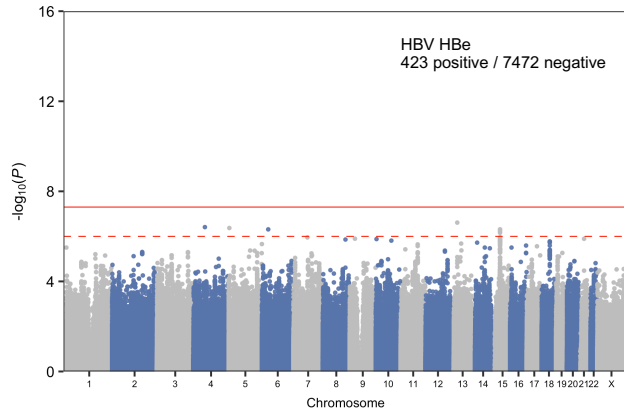

Outcome: Seropositivity status (positive / negative)

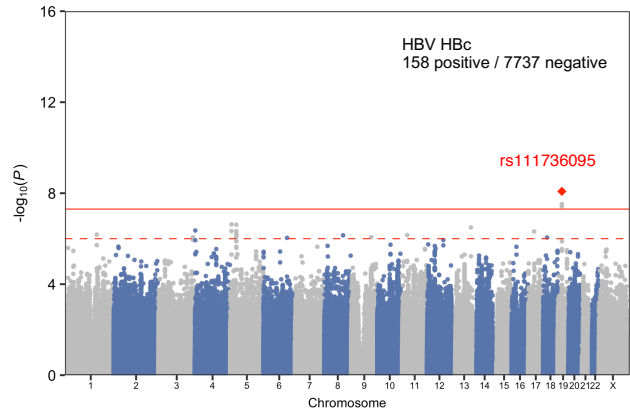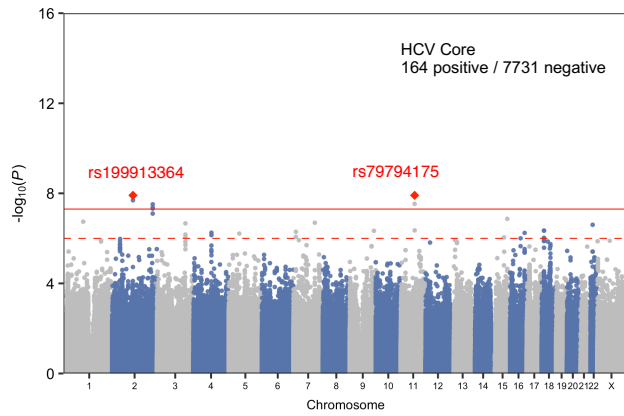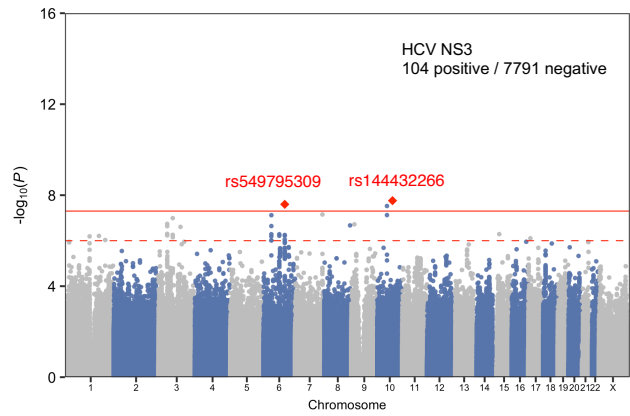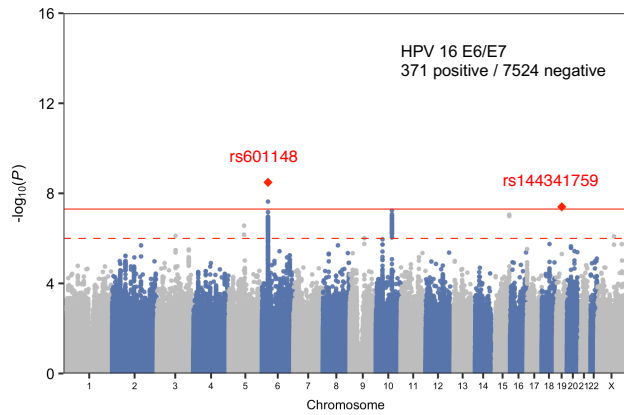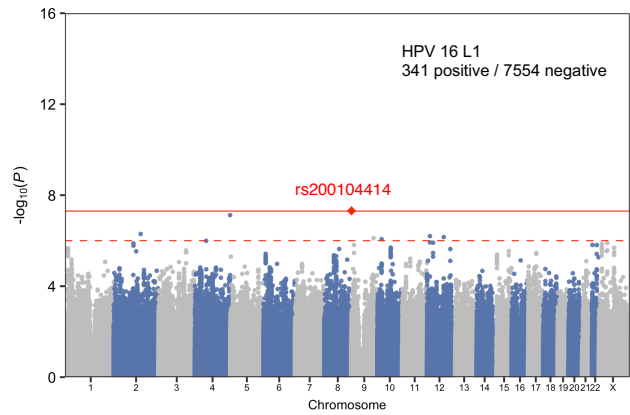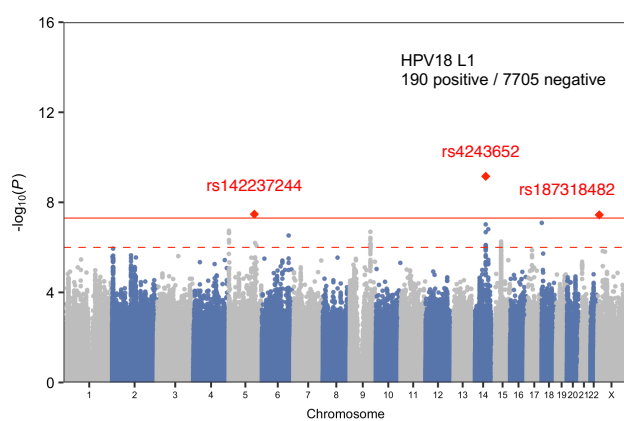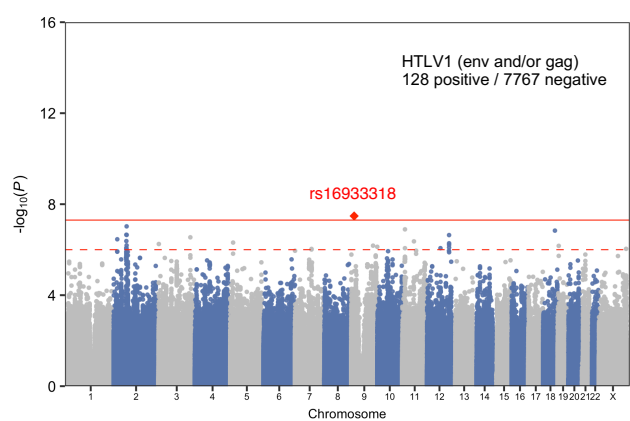

Outcome: Seropositivity status (positive / negative)

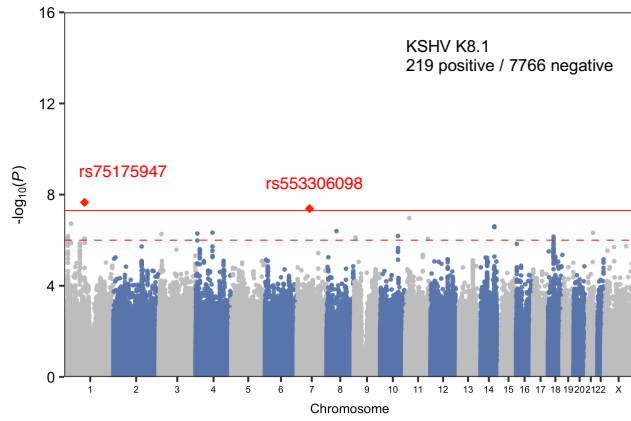

Outcome: Seropositivity status (positive / negative)

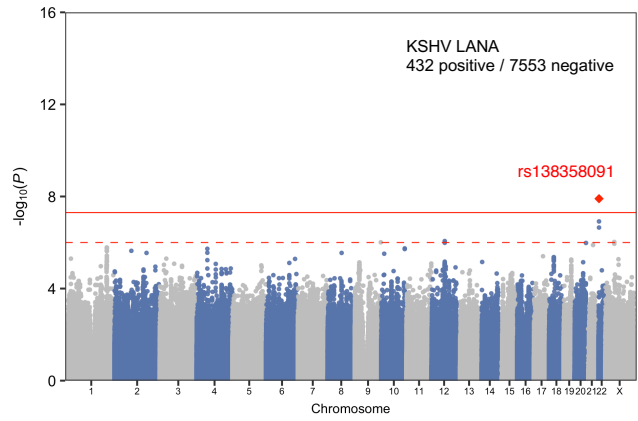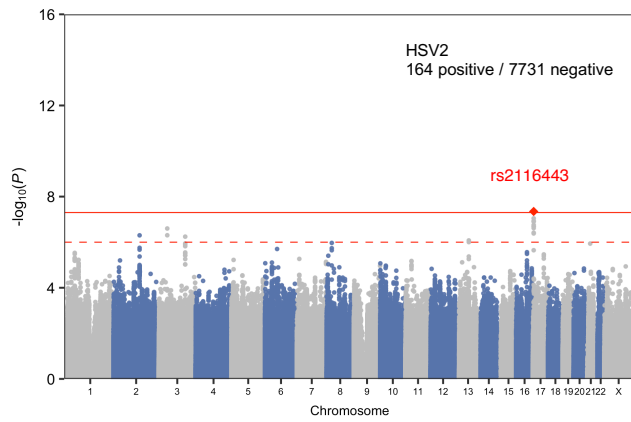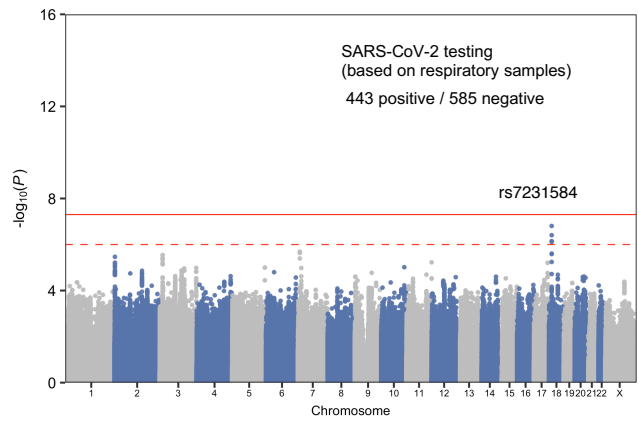



**Supplementary Figure 2:** Linkage disequilibrium (LD) structure between the top-ranking variants in HLA associated with continuous antibody response phenotypes (MFI z-scores) for each antigen

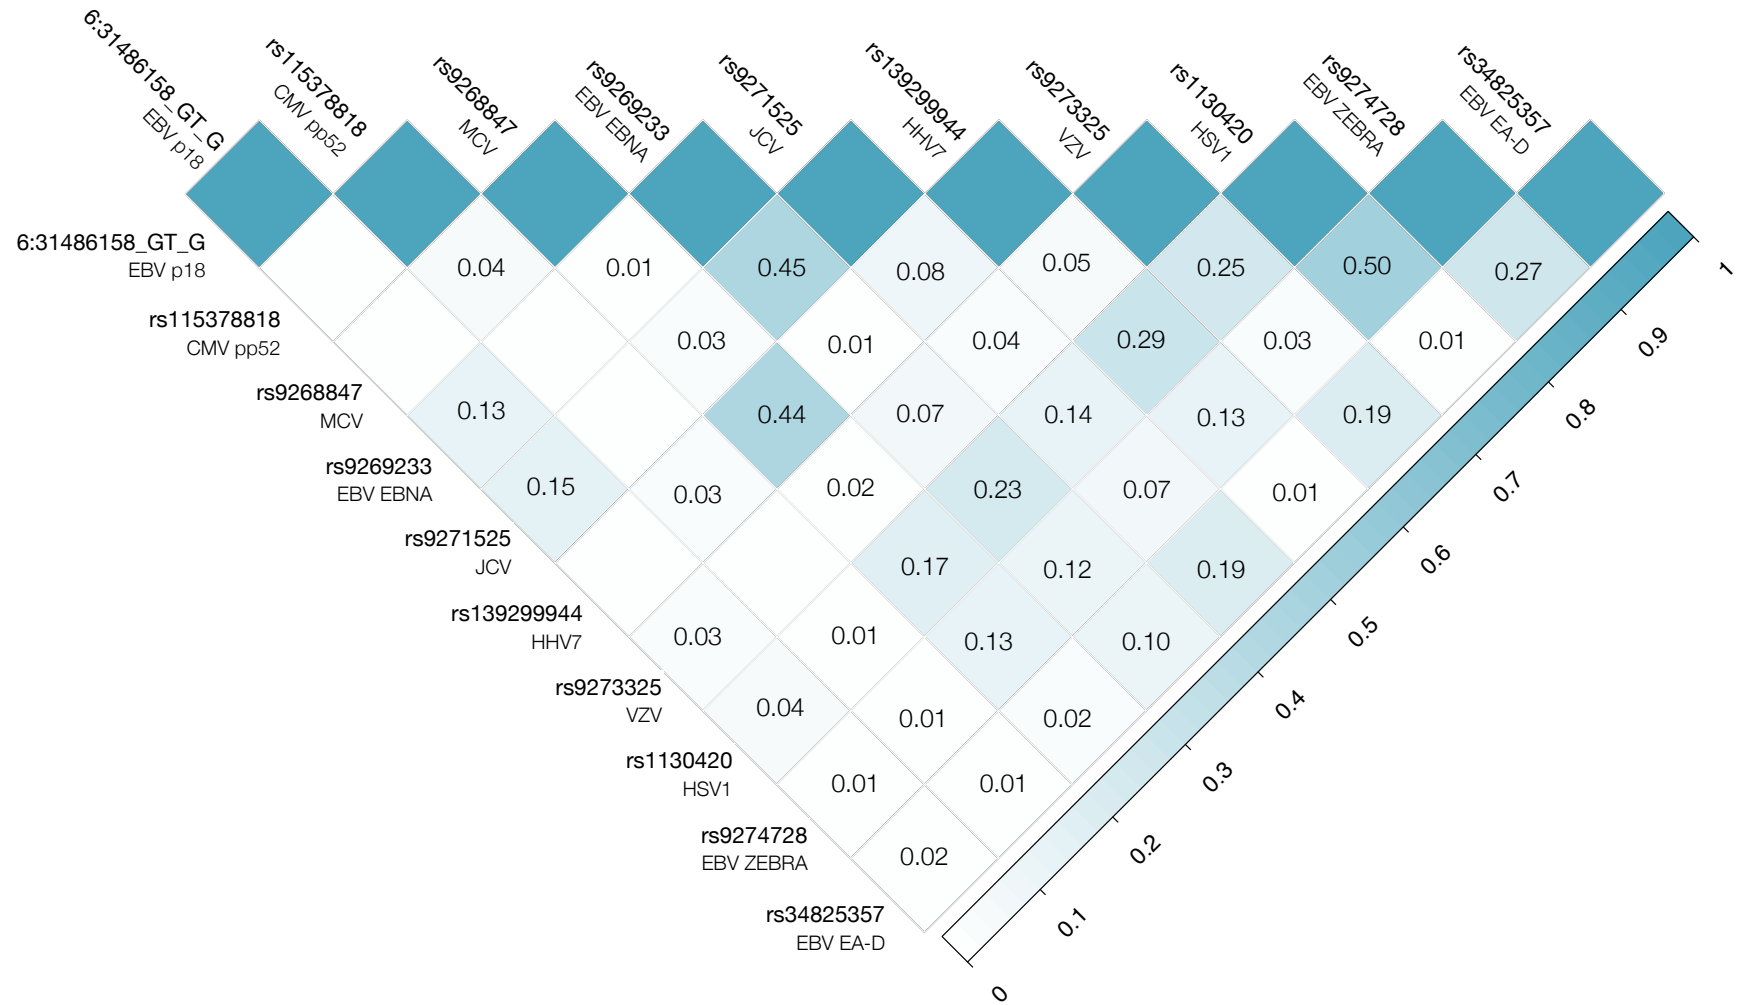

**Supplementary Figure 3:** Summary of expression (eQTL) and splicing quantitative trait loci (sQTL) associations obtained in GTEx v8 and DICE (Database of Immune Cell Expression) for the genome-wide significant variants ( $P < 5.0 \times 10^{-8}$ ) for continuous antibody response phenotypes. In each panel, frequency corresponds to the number of variants with a specific gene-tissue or gene-cell combination.

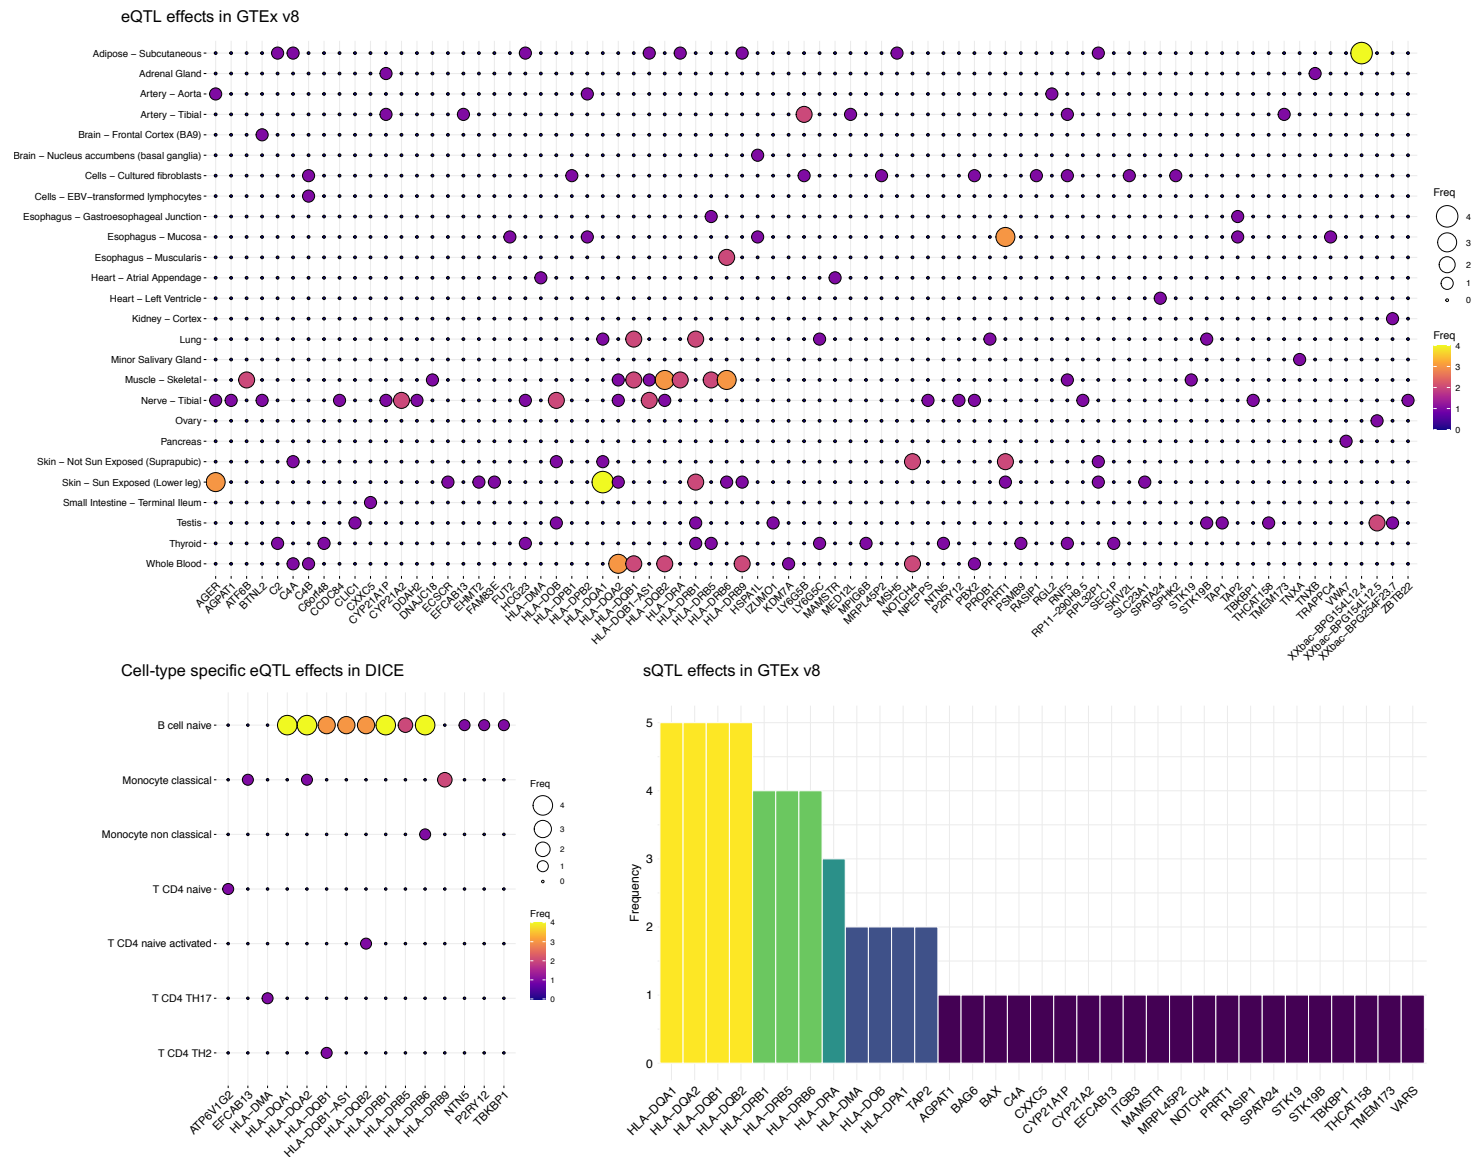

**Supplementary Figure 4:** Regional association plots depicting results based on analyses conditional on statistically independent classical HLA all

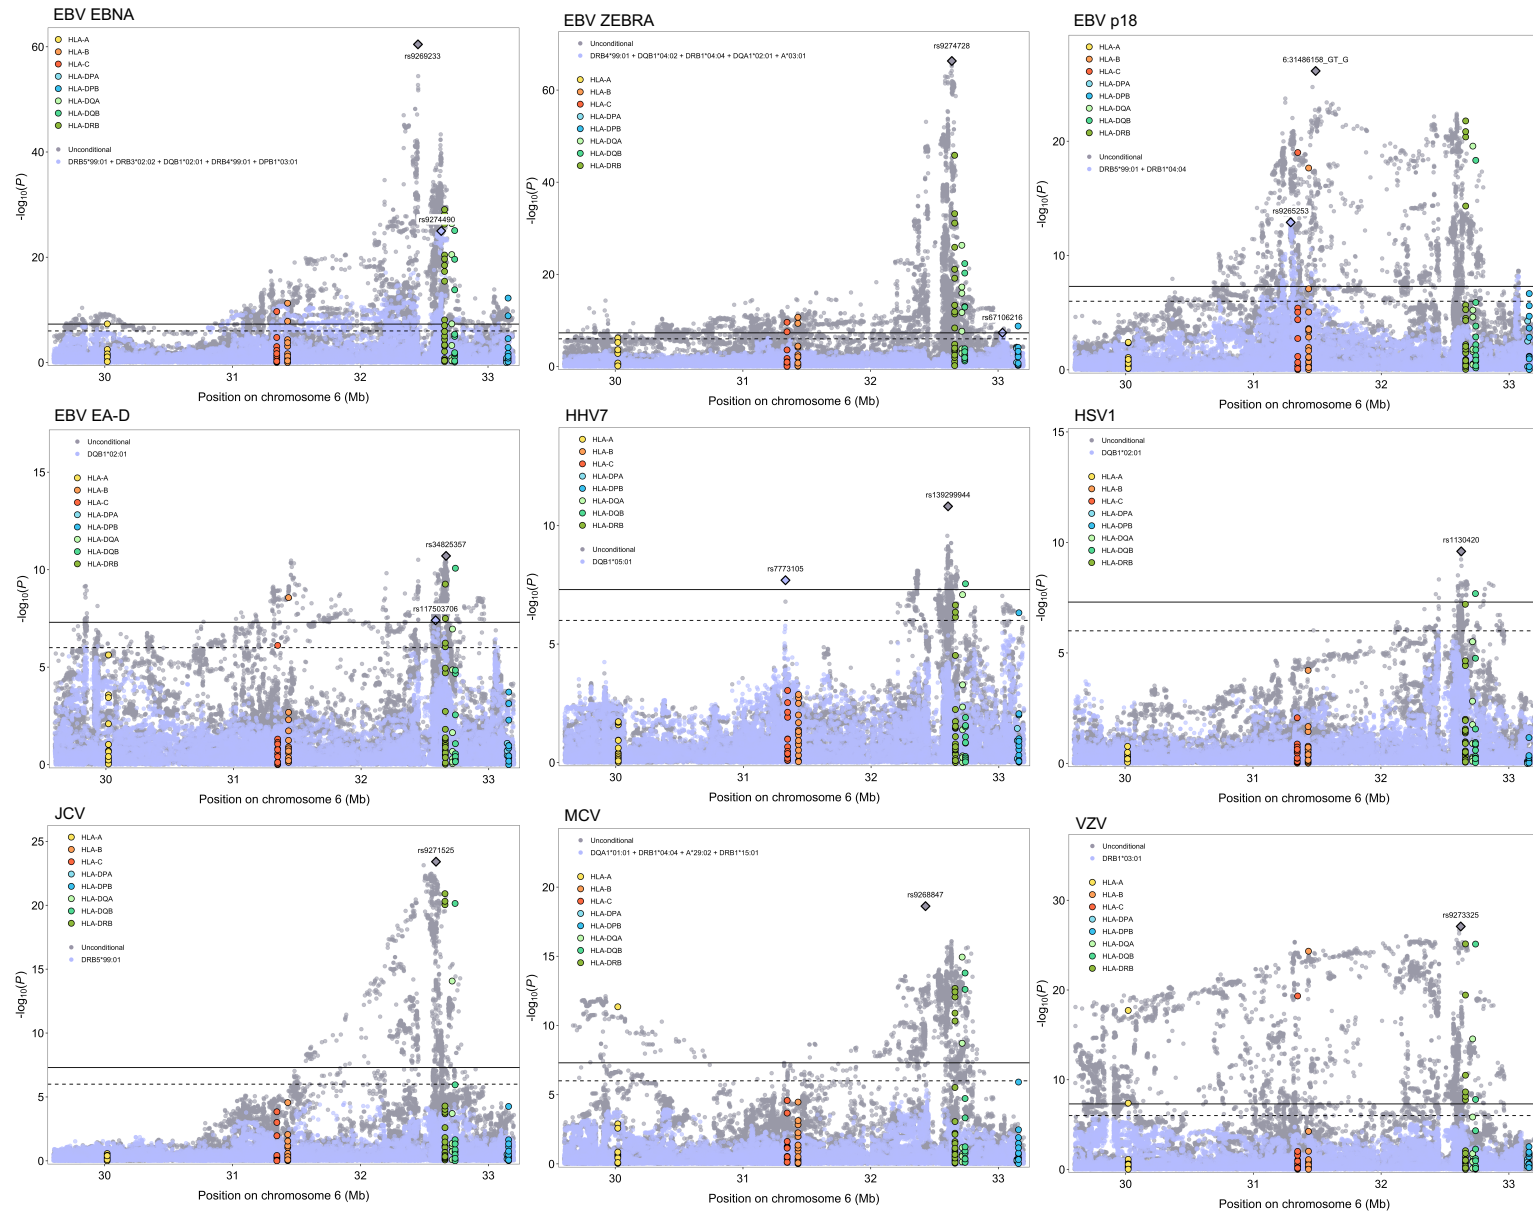

**Supplementary Figure 5: TWAS associations with continuous antigen response phenotypes.** Two Manhattan plots depicting the transcriptome-wide associations for genes with a positive direction of effect (increased expression leads to higher antibody response) and genes with a negative direction of effect (increased expression associated with a decreasing).

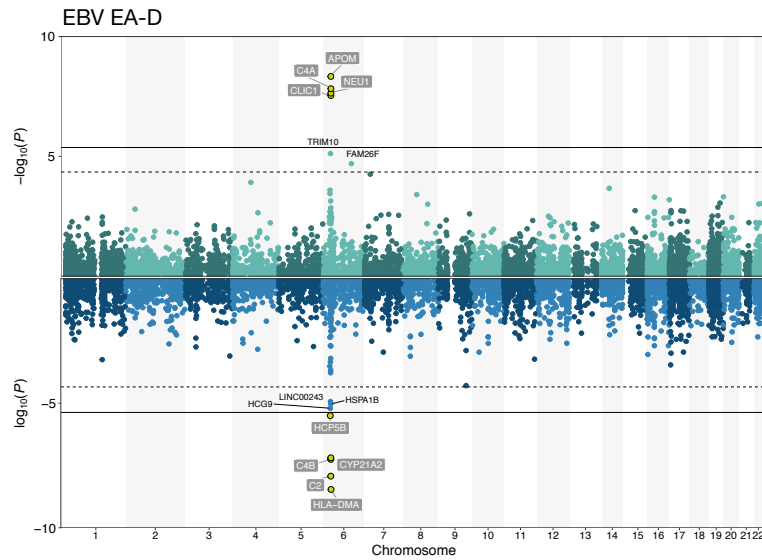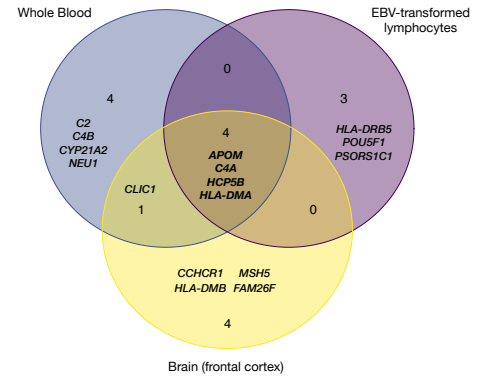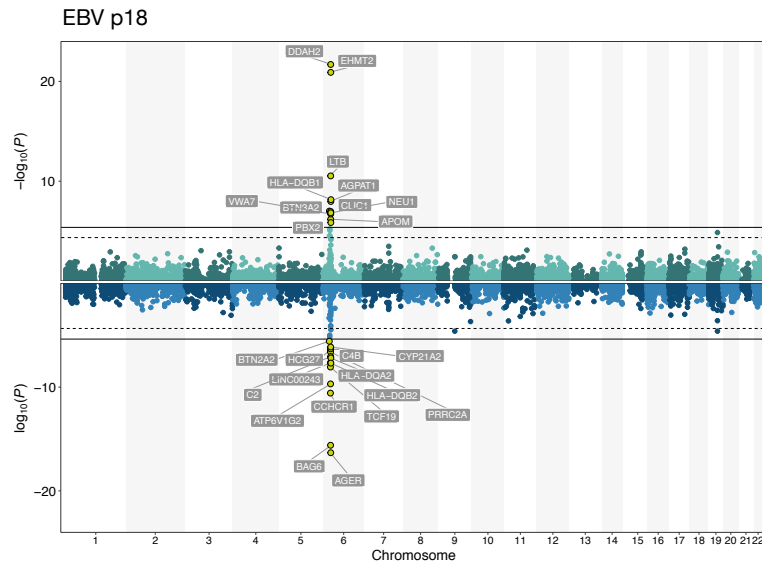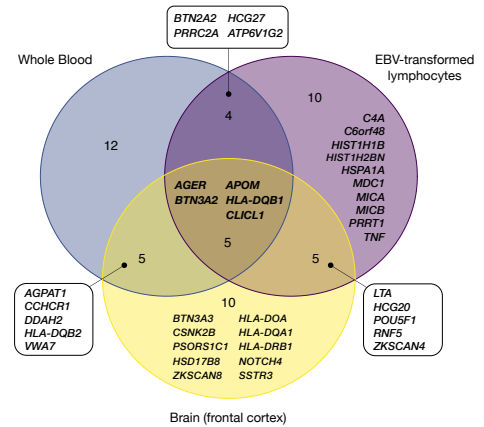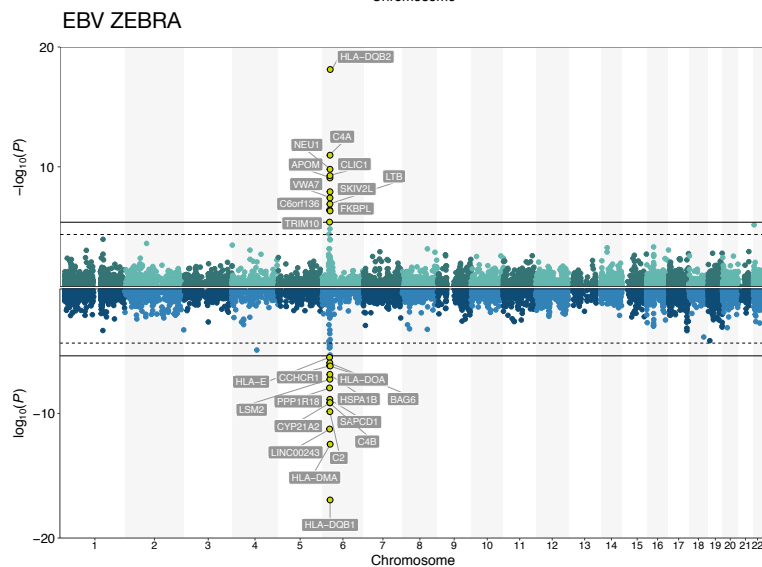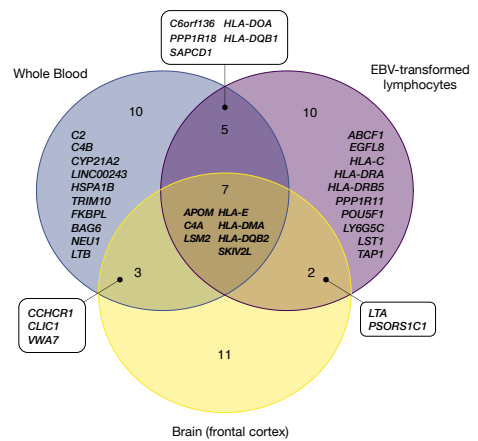

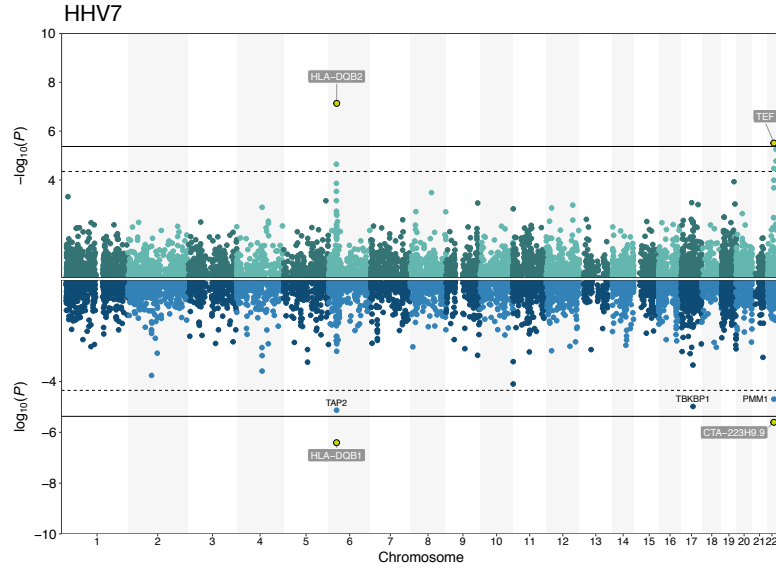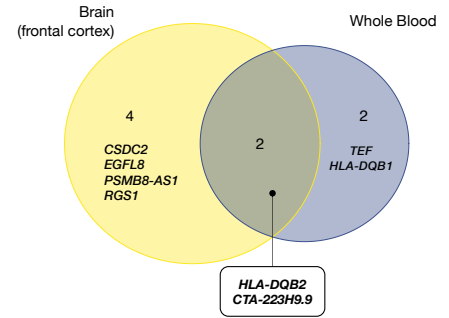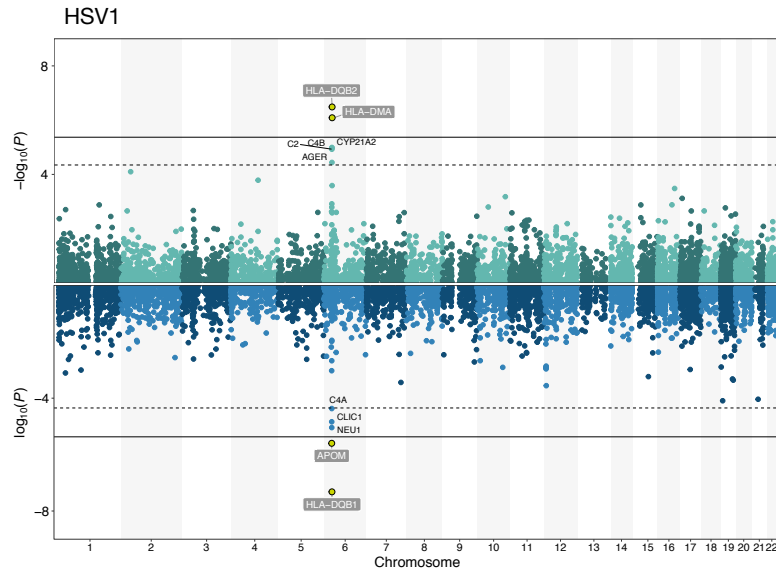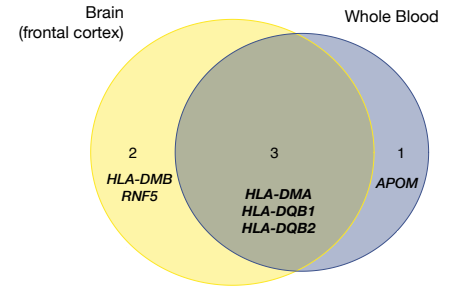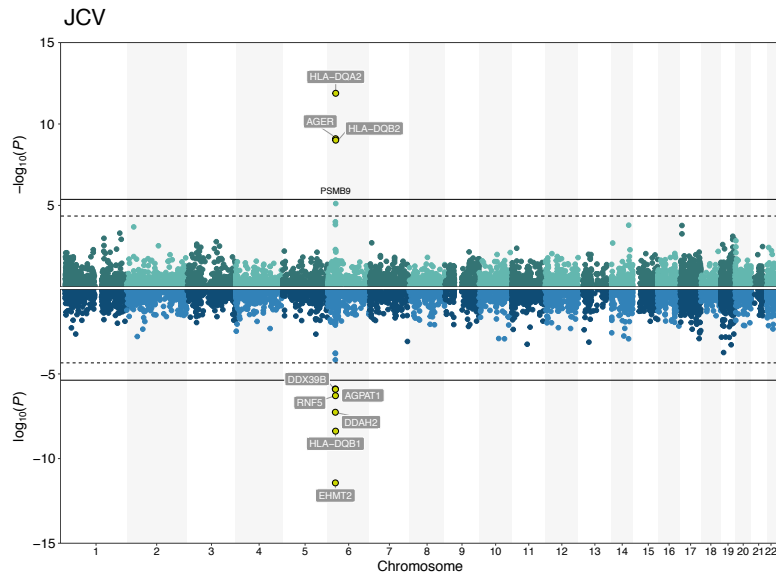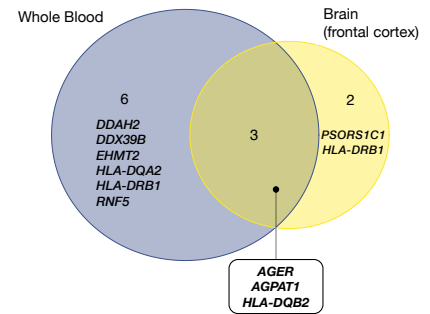

**Supplementary Figure 6:** Variant-specific effects on *ACE2* gene expression normalized effect size (NES) and the log odds ratio (OR) for having a positive for SARS-CoV-2 test for significant, independent ( $q_{FDR} < 0.05$ ,  $LD r^2 > 0.10$ ) expression quantitative trait loci identified in GTEx v8. Association between *ACE2* expression and SARS-CoV-2 log(OR) was estimated using a linear generalized estimating equations model, with a cluster term for tissue type.

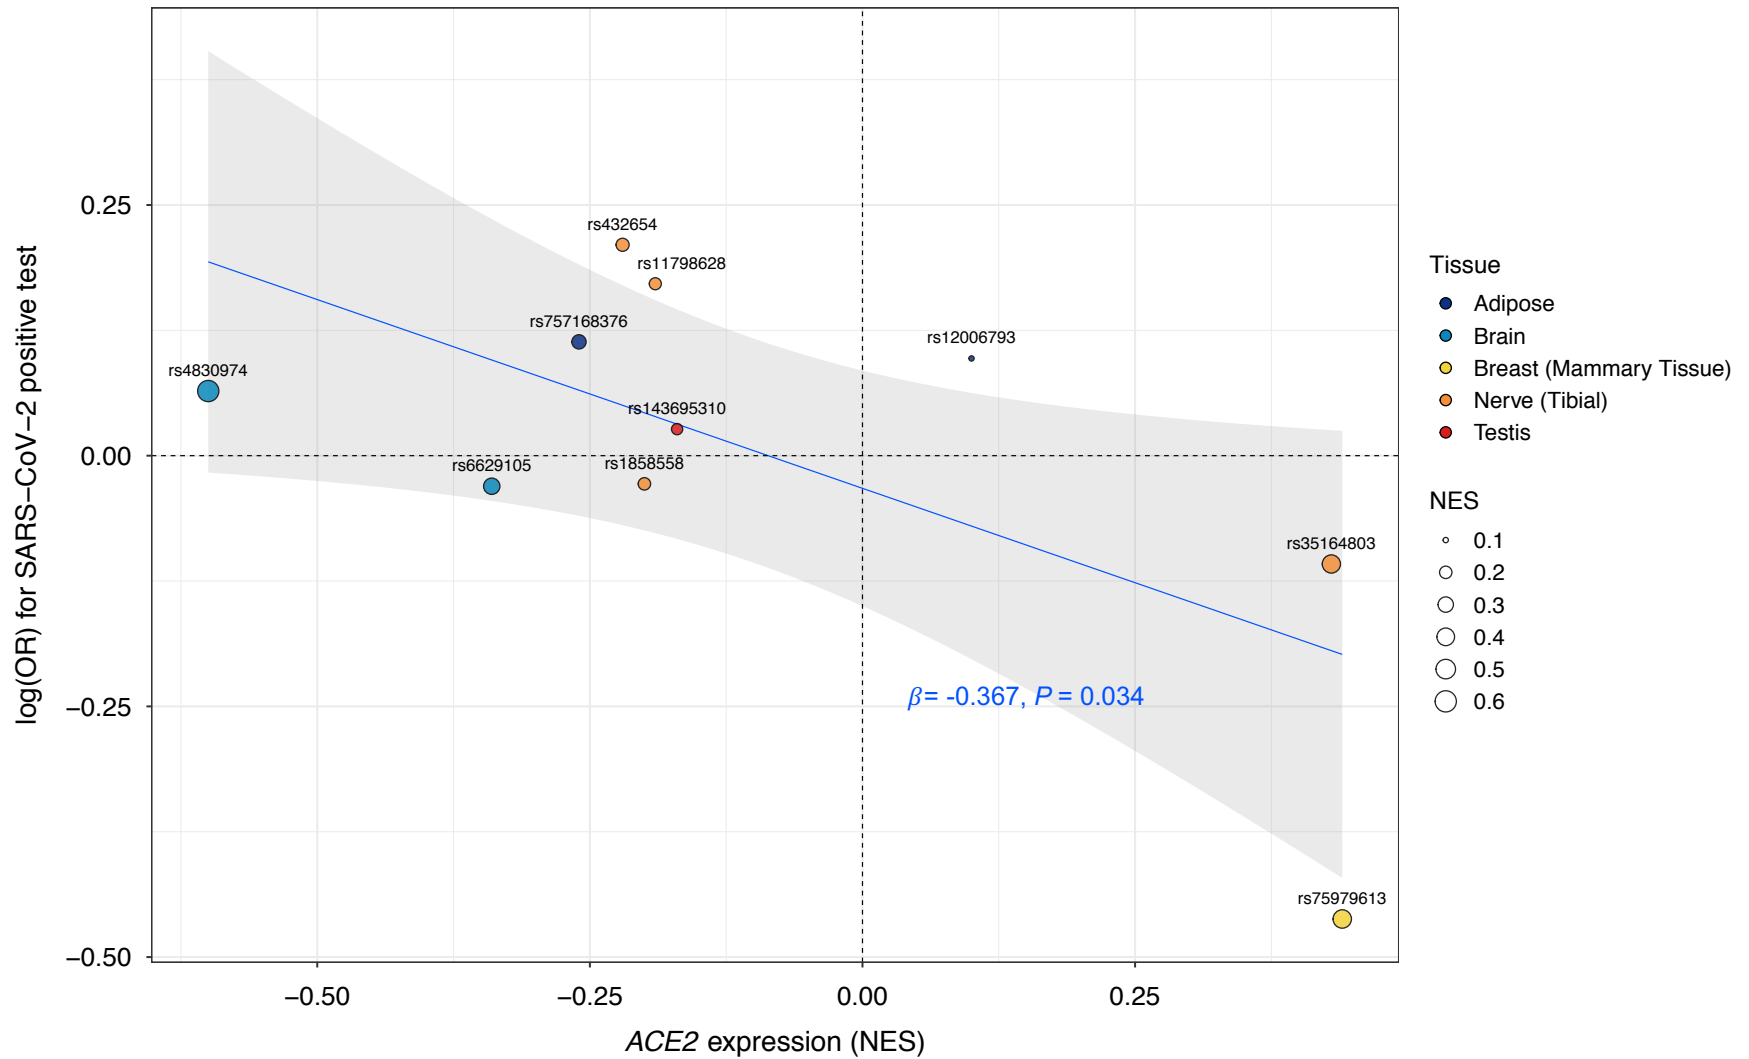

**Supplementary Figure 7:** Visualization of significantly ( $q_{FDR} < 0.05$ ) enriched Reactome pathways for TWAS-identified genes grouped by virus family (human herpes viruses vs. human polyoma viruses) and specificity of association (multiple antigens vs. single antigen). Gene ratio corresponds to the size of the overlap between the input gene list with a specific gene set to the size of the overlap between the input gene list with all the members of the collection of gene sets.

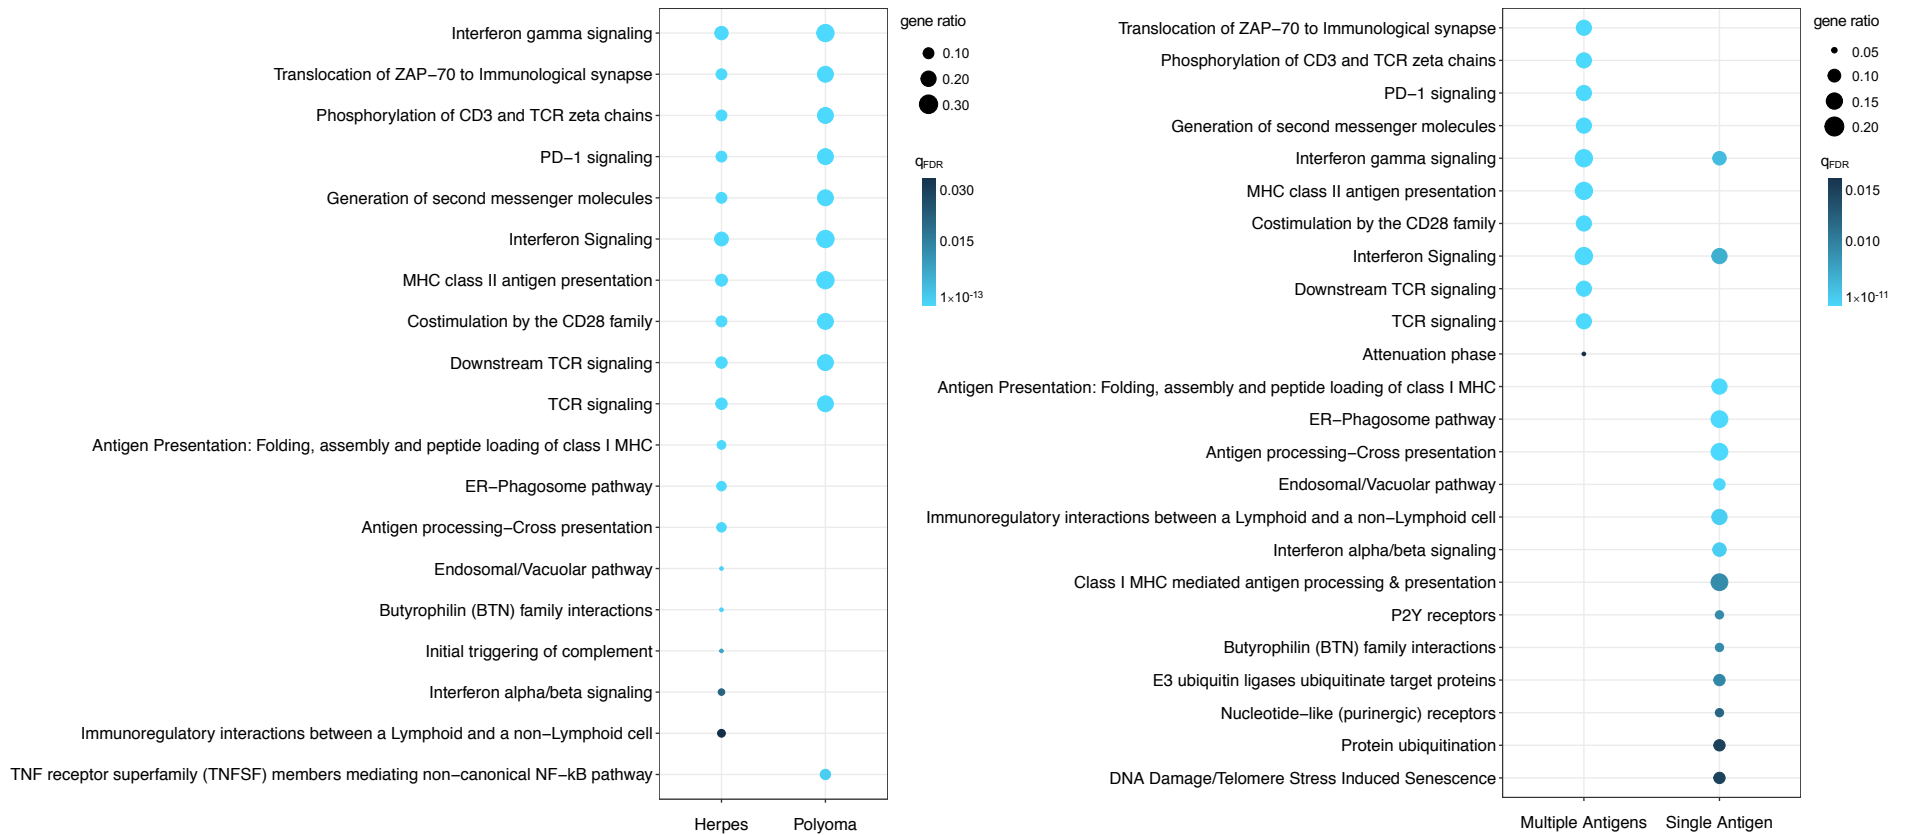

**Supplementary Figure 8:** Significant protein interactions identified in the STRING database for genes associated with multiple antigens. The color of each node corresponds to the lowest  $-\log_{10}(P_{TWAS})$  observed across phenotypes and tissues. This analysis considered unidirectional functional interactions with confidence scores  $\geq 400$  (medium confidence) at the  $q_{FDR} < 0.05$  threshold. Interactions were limited to the input genes.

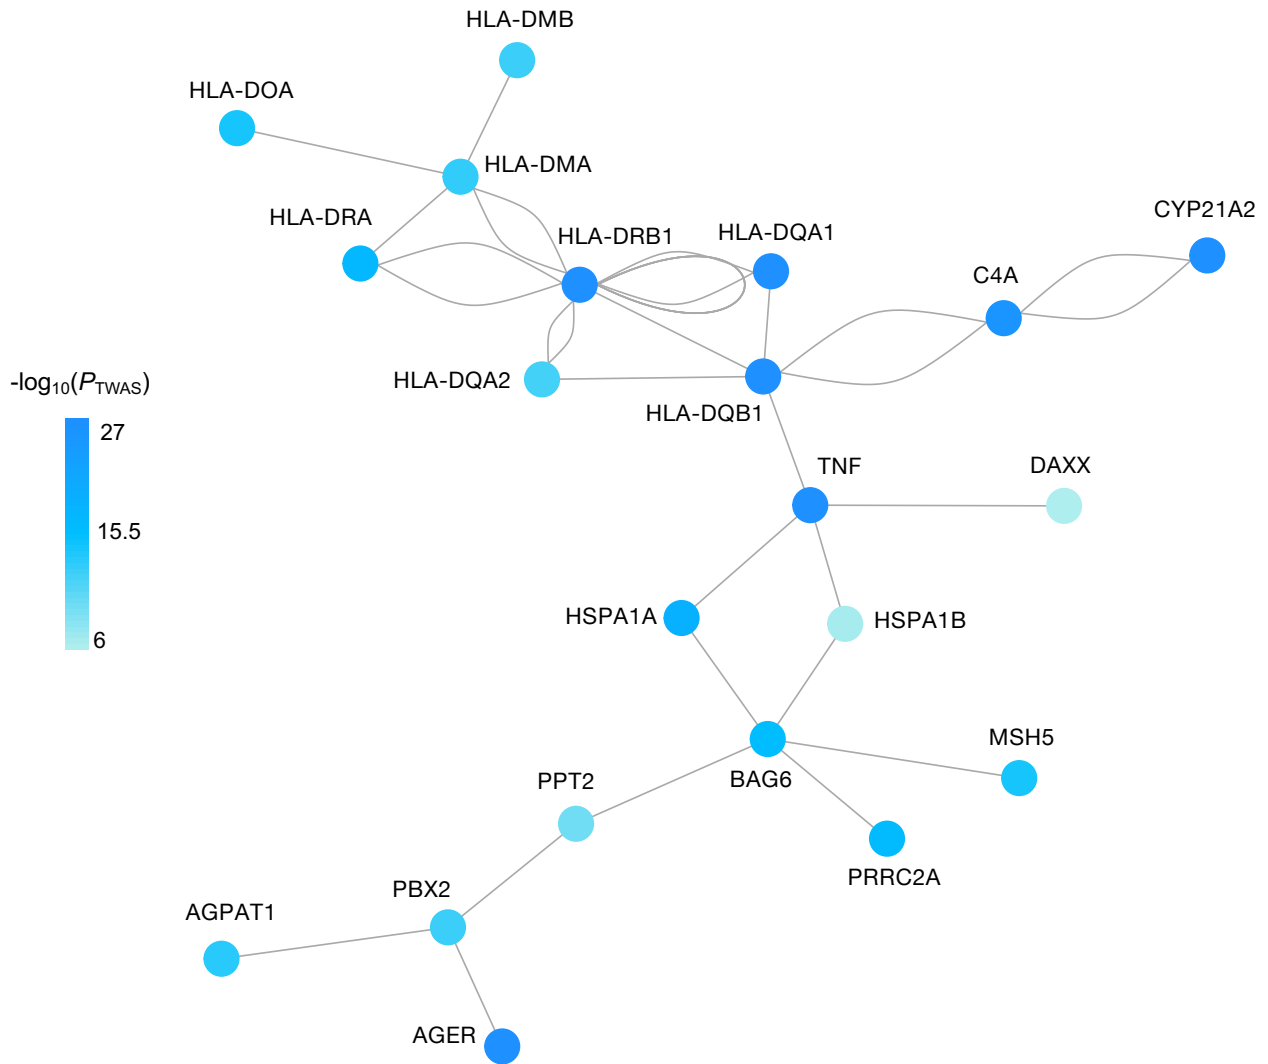

Supplement: 79653-2020.05.01.20088054-1.pdf [file 79653-2020.05.01.20088054-1.pdf]
