# Supplementary material for: The landscape of host genetic factors involved in immune response to common viral infections
Source: PubMed Central journal article supplement — medRxiv. 2020 Sep 5:2020.05.01.20088054. Preprint. [Version 3] doi: 10.1101/2020.05.01.20088054 (PMC7273301; doi:10.1101/2020.05.01.20088054), 2020-09-05

**Supplementary Table 1:** Characteristics of the UK Biobank serology sub-cohort consisting of predominantly European ancestry participants.

| Characteristic                               | Serology Data<br>(N=7948) |         | No Serology Data<br>(N=405,857) |        |
|----------------------------------------------|---------------------------|---------|---------------------------------|--------|
|                                              | N                         | (%)     | N                               | (%)    |
| Age at assessment                            |                           |         |                                 |        |
| Mean (SD)                                    | 56.74                     | (8.07)  | 56.74                           | (8.00) |
| Sex                                          |                           |         |                                 |        |
| Male                                         | 3519                      | (44.3)  | 187685                          | (46.2) |
| Smoking status                               |                           |         |                                 |        |
| Never smoker                                 | 4348                      | (55.0)  | 218228                          | (54.0) |
| Former smoker                                | 2774                      | (35.1)  | 143908                          | (35.6) |
| Current smoker                               | 789                       | (14.48) | 42285                           | (10.5) |
| Body-mass index (BMI) in kg/m <sup>2</sup>   |                           |         |                                 |        |
| Mean (SD)                                    | 27.36                     | (4.82)  | 27.41                           | (4.77) |
| Townsend deprivation index                   |                           |         |                                 |        |
| Mean (SD)                                    | -1.52                     | (2.96)  | -1.47                           | (2.99) |
| Autoimmune or chronic inflammatory condition | 1033                      | (13.0)  | 50467                           | (12.4) |
| Any type of immune deficiency                | 1223                      | (0.3)   | 24                              | (0.3)  |
| Cancer (prevalent or incident)               | 1069                      | (13.4)  | 52971                           | (13.1) |

Included in genetic association analyses (N=7985)

| <i>Human Herpes viruses</i>                    | Seropositive | (%)    |
|------------------------------------------------|--------------|--------|
| Cytomegalovirus (CMV)                          | 4437         | (56.2) |
| CMV pp28                                       | 4461         | (56.5) |
| CMV pp52                                       | 5000         | (63.3) |
| CMV pp150                                      | 4526         | (57.3) |
| Epstein-Barr virus (EBV)                       | 7470         | (94.6) |
| EBV EA-D                                       | 6806         | (86.2) |
| EBV EBNA                                       | 7003         | (88.7) |
| EBV VCA p18                                    | 7492         | (94.9) |
| EBV ZEBRA                                      | 7197         | (91.2) |
| Human Herpesvirus-6 (HHV6)                     | 7156         | (90.6) |
| HHV6 IE1A                                      | 6077         | (77.0) |
| HHV6 IE1B                                      | 6237         | (79.0) |
| HHV6 p101 k                                    | 6188         | (78.4) |
| Human Herpesvirus-7 (HHV7) U14                 | 7481         | (94.8) |
| Herpes Simplex virus-1 (HSV1) 1gG              | 5468         | (69.3) |
| Herpes Simplex virus-2 (HSV2) 2mgG             | 1214         | (15.4) |
| Kaposi's Sarcoma-Associated Herpesvirus (KSHV) | 607          | (7.7)  |
| KSHV K.81                                      | 219          | (2.8)  |
| KSHV LANA                                      | 432          | (5.5)  |
| VZV gE/Ig                                      | 7316         | (92.3) |

*Human Polyomaviruses*

|                                |      |        |
|--------------------------------|------|--------|
| BKV                            | 7523 | (95.3) |
| JCV                            | 4471 | (56.6) |
| Merkel Cell Polyomavirus (MCV) | 5219 | (66.1) |

*Human Papillomaviruses*

|                               |     |       |
|-------------------------------|-----|-------|
| HPV16 E6 or E7 (oncoproteins) | 371 | (4.7) |
| HPV16 L1                      | 341 | (4.3) |
| HPV18 L1                      | 190 | (2.4) |

*Hepatitis viruses*

|                   |     |       |
|-------------------|-----|-------|
| Hepatitis B (HBV) | 128 | (1.6) |
| HBV HBc           | 158 | (2.0) |
| HBV HBe           | 423 | (5.4) |
| Hepatitis C (HCV) | 23  | (0.3) |
| HCV Core          | 164 | (2.1) |
| HCV NS3           | 104 | (1.3) |

*Human T-lymphotropic viruses*

|                                      |     |       |
|--------------------------------------|-----|-------|
| Human T-lymphotropic Virus-1 (HTLV1) | 128 | (1.6) |
| HTLV1 env                            | 70  | (0.9) |
| HTLV1 gag                            | 59  | (0.3) |

**Supplementary Table 2:** Baseline characteristics of UK Biobank participants with available results for SARS-CoV-2 testing up to April 14, 2020

| Participant-level characteristics                               | Tested for SARS-CoV-2 |          |                |          |             |          | Not Tested     |          |
|-----------------------------------------------------------------|-----------------------|----------|----------------|----------|-------------|----------|----------------|----------|
|                                                                 | Negative: 1929        |          | Positive: 1073 |          | Total: 3002 |          | Total: 501,062 |          |
|                                                                 | N                     | (%)      | N              | (%)      | N           | (%)      | N              | (%)      |
| <b>Age at assessment</b>                                        |                       |          |                |          |             |          |                |          |
| Mean (SD)                                                       | 56.97                 | (8.68)   | 56.91          | (9.07)   | 56.95       | (8.94)   | 56.53          | (8.09)   |
| <b>Sex</b>                                                      |                       |          |                |          |             |          |                |          |
| Male                                                            | 888                   | (40.6)   | 581            | (54.1)   | 1469        | (48.9)   | 227665         | (45.6)   |
| <b>Self-reported ethnicity</b>                                  |                       |          |                |          |             |          |                |          |
| White                                                           | 1772                  | (91.9)   | 565            | (87.8)   | 1306        | (88.6)   | 471419         | (94.1)   |
| Mixed (White, Black, Asian or other)                            | 14                    | (0.7)    | 6              | (0.6)    | 8           | (0.5)    | 2950           | (0.6)    |
| Asian (Indian, Pakistani, Bangladeshi)                          | 45                    | (2.3)    | 53             | (4.9)    | 49          | (3.3)    | 9833           | (2.0)    |
| Black (Caribbean, African, British, other)                      | 57                    | (3.0)    | 64             | (6.0)    | 68          | (4.6)    | 7993           | (1.6)    |
| Chinese                                                         | 1                     | (0.1)    | 4              | (0.4)    | 4           | (0.3)    | 1570           | (0.3)    |
| Other ethnic group                                              | 31                    | (1.6)    | 22             | (2.1)    | 6           | (0.4)    | 4530           | (0.9)    |
| <b>Body-mass index (BMI) in kg/m<sup>2</sup></b>                |                       |          |                |          |             |          |                |          |
| Mean (SD)                                                       | 28.20                 | (5.50)   | 29.17          | (5.50)   | 28.54       | (5.52)   | 27.43          | (4.80)   |
| <b>Townsend deprivation index</b>                               |                       |          |                |          |             |          |                |          |
| Mean (SD)                                                       | -0.50                 | (3.41)   | -0.09          | (3.51)   | -0.35       | (3.45)   | -1.30          | (3.09)   |
| <b>Smoking status</b>                                           |                       |          |                |          |             |          |                |          |
| Never smoker                                                    | 932                   | (48.6)   | 503            | (47.4)   | 1435        | (48.1)   | 272102         | (54.8)   |
| Former smoker                                                   | 710                   | (37.0)   | 442            | (41.6)   | 1152        | (38.6)   | 171918         | (34.6)   |
| Current smoker                                                  | 277                   | (14.4)   | 117            | (11.0)   | 394         | (13.2)   | 52585          | (10.6)   |
| <b>Cigarette pack-years in smokers</b>                          |                       |          |                |          |             |          |                |          |
| Mean (SD)                                                       | 23.14                 | (14.17)  | 26.24          | (17.88)  | 24.26       | (15.68)  | 21.46          | (13.77)  |
| <b>Alcohol intake frequency</b>                                 |                       |          |                |          |             |          |                |          |
| Never / non-drinker                                             | 203                   | (10.6)   | 149            | (14.0)   | 352         | (11.5)   | 40296          | (8.1)    |
| Special occasions only                                          | 278                   | (14.5)   | 154            | (14.4)   | 432         | (14.4)   | 57580          | (11.6)   |
| 1-3 times a month                                               | 219                   | (11.4)   | 139            | (13.0)   | 358         | (11.7)   | 55500          | (11.1)   |
| 1-2 times per week                                              | 455                   | (23.7)   | 262            | (24.6)   | 717         | (23.7)   | 128580         | (25.8)   |
| 3-4 times per week                                              | 371                   | (19.3)   | 191            | (17.9)   | 562         | (19.6)   | 114883         | (23.1)   |
| Daily or almost daily                                           | 395                   | (20.6)   | 172            | (16.1)   | 567         | (19.1)   | 101207         | (20.3)   |
| <b>Weekly alcohol intake (gr)</b>                               |                       |          |                |          |             |          |                |          |
| Mean (SD)                                                       | 145.95                | (182.23) | 138.86         | (186.72) | 143.42      | (183.85) | 146.61         | (170.27) |
| <b>Forced expiratory volume in 1-sec (FEV<sub>1</sub>) in L</b> |                       |          |                |          |             |          |                |          |
| Mean (SD)                                                       | 2.72                  | (0.78)   | 2.73           | (0.81)   | 2.73        | (0.79)   | 2.84           | (0.79)   |
| <b>Forced vital capacity (FVC) in L</b>                         |                       |          |                |          |             |          |                |          |
| Mean (SD)                                                       | 3.60                  | (0.98)   | 3.62           | (1.01)   | 3.61        | (0.99)   | 3.74           | (1.01)   |
| <b>FEV<sub>1</sub>/FVC</b>                                      |                       |          |                |          |             |          |                |          |
| Mean (SD)                                                       | 0.76                  | (0.08)   | 0.76           | (0.08)   | 0.76        | (0.08)   | 0.76           | (0.07)   |
| <b>Charlson comorbidity index</b>                               |                       |          |                |          |             |          |                |          |
| 0                                                               | 1046                  | (54.2)   | 580            | (54.1)   | 1626        | (54.2)   | 350909         | (70.2)   |
| 1-2                                                             | 648                   | (33.6)   | 364            | (33.9)   | 1012        | (33.7)   | 125718         | (25.2)   |
| 3-4                                                             | 172                   | (8.9)    | 104            | (9.7)    | 276         | (9.2)    | 18978          | (3.8)    |

|                                         |      |        |     |        |      |        |        |        |
|-----------------------------------------|------|--------|-----|--------|------|--------|--------|--------|
| 5 or more                               | 63   | (3.3)  | 25  | (2.3)  | 88   | (3.3)  | 3929   | (0.8)  |
| Genetic association analyses            |      |        |     |        |      |        |        |        |
| European ancestry, pass quality control | 1506 | (78.1) | 785 | (73.2) | 2291 | (76.3) | 411514 | (82.4) |
| Results from respiratory specimens      | 1334 | (69.2) | 676 | (63.0) | 2010 | (67.0) | -      | -      |
| Number of SARS-CoV-2 tests              |      |        |     |        |      |        |        |        |
| Tested once                             | 1067 | (55.3) | 438 | (40.8) |      |        |        |        |
| Tested multiple times                   | 862  | (44.7) | 635 | (59.2) |      |        |        |        |

|                                          |                |        |                |        |
|------------------------------------------|----------------|--------|----------------|--------|
| Test-level characteristics: 2724 tests   | Negative: 3550 |        | Positive: 1806 |        |
|                                          | N              | (%)    | N              | (%)    |
| Specimen type                            |                |        |                |        |
| Respiratory                              | 3042           | (85.7) | 1515           | (83.9) |
| Serum                                    | 109            | (3.1)  | 59             | (3.3)  |
| Unknown or other                         | 399            | (11.2) | 232            | (12.8) |
| Test origin                              |                |        |                |        |
| Confirmed acute care / inpatient setting | 1622           | (45.7) | 761            | (42.1) |
| Unknown                                  | 1929           | (54.3) | 1045           | (57.9) |

**Supplementary Table 3:** Odds ratios (OR) for lead variants associated with seropositivity for each antigen and SARS-Cov-2 test positive status. Linkage disequilibrium (LD)  $r^2$  was calculated with respect to the lead variant for the continuous seroreactivity phenotype for the same antigen, if applicable.

| Antigen            | Chr   | Position | Variant   | Alleles      |        | EAF | OR    | P     | Function              | Nearest Gene         | INFO                   | LD $r^2$ with Seroreactivity Variant |                   |
|--------------------|-------|----------|-----------|--------------|--------|-----|-------|-------|-----------------------|----------------------|------------------------|--------------------------------------|-------------------|
|                    |       |          |           | Effect       | Other  |     |       |       |                       |                      |                        |                                      |                   |
| CMV                | pp150 | 10       | 71789604  | rs1181430303 | CAAT   | C   | 0.988 | 0.362 | $1.3 \times 10^{-8}$  | intergenic           | <i>RP11-262I2.2</i>    | 0.974                                | -                 |
| EBV                | EA-D  | 6        | 32447644  | rs2395192    | C      | T   | 0.447 | 0.656 | $4.0 \times 10^{-19}$ | intergenic           | <i>HLA-DRB9</i>        | 0.983                                | rs34825357: 0.670 |
| EBV                | EBNA  | 6        | 32429303  | rs9268848    | G      | A   | 0.449 | 1.598 | $1.2 \times 10^{-18}$ | intronic             | <i>HLA-DRB9</i>        | 0.992                                | rs9269233: 0.296  |
| EBV                | ZEBRA | 6        | 32578323  | rs17211342   | A      | G   | 0.542 | 0.623 | $1.6 \times 10^{-15}$ | intergenic           | <i>HLA-DRB1</i>        | 0.999                                | rs9274728: 0.388  |
| HHV6               | IE1B  | 4        | 111337175 | rs72666167   | G      | A   | 0.952 | 1.588 | $3.2 \times 10^{-8}$  | intronic             | <i>ENPEP / ZNF969P</i> | 0.950                                | -                 |
| HHV6               | p101k | 6        | 31352446  | rs7775759    | G      | A   | 0.730 | 0.785 | $2.1 \times 10^{-8}$  | intergenic           | <i>HLA-S</i>           | 1.000                                | -                 |
| HSV2               | 2mgG  | 17       | 3707723   | rs2116443    | C      | T   | 0.485 | 1.279 | $4.5 \times 10^{-8}$  | upstream             | <i>ITGAE</i>           | 0.993                                | -                 |
| KSHV               | K8.1  | 1        | 94134854  | rs75175947   | G      | C   | 0.988 | 0.221 | $2.2 \times 10^{-8}$  | intronic             | <i>BCAR3</i>           | 0.924                                | -                 |
|                    |       | 7        | 67785001  | rs553306098  | ATATAT | A   |       | 0.983 | 0.242                 | $4.1 \times 10^{-8}$ | upstream               | <i>LOC105375341</i>                  | 0.790             |
| KSHV               | LANA  | 22       | 19399297  | rs138358091  | A      | C   | 0.983 | 0.344 | $1.2 \times 10^{-8}$  | intronic             | <i>HIRA</i>            | 0.938                                | -                 |
| VZV                | gE/Ig | 6        | 32161034  | rs3096688    | C      | T   | 0.301 | 0.701 | $3.7 \times 10^{-8}$  | intronic             | <i>GP5M3</i>           | 0.995                                | rs9273325: 0.076  |
| HPV16              | E6/E7 | 6        | 32573265  | rs601148     | G      | T   | 0.805 | 0.603 | $3.3 \times 10^{-9}$  | intergenic           | <i>HLA-DRB1</i>        | 0.973                                | -                 |
|                    |       | 19       | 30611215  | rs144341759  | G      | A   | 0.975 | 0.383 | $4.0 \times 10^{-8}$  | intergenic           | <i>CTC-448F2.6</i>     | 0.920                                | -                 |
| HPV16              | L1    | 9        | 1061974   | rs200104414  | A      | ATG | 0.981 | 0.295 | $4.9 \times 10^{-8}$  | intergenic           | <i>RPS27AP14</i>       | 0.822                                | -                 |
|                    |       | 5        | 139338366 | rs142237244  | G      | A   | 0.987 | 0.201 | $3.4 \times 10^{-8}$  | intronic             | <i>NRG2</i>            | 0.890                                | -                 |
| HPV18              | L1    | 14       | 77060652  | rs4243652    | G      | A   | 0.035 | 3.132 | $7.0 \times 10^{-10}$ | intronic             | <i>LOC105370576</i>    | 0.987                                | -                 |
|                    |       | X        | 12493856  | rs187318482  | C      | G   | 0.989 | 0.271 | $3.6 \times 10^{-8}$  | intronic             | <i>FRMPD4</i>          | 0.750                                | -                 |
| HBV                | HBc   | 19       | 22899930  | rs111736095  | C      | T   | 0.984 | 0.217 | $8.3 \times 10^{-9}$  | upstream             | <i>CTC-457E21.9</i>    | 0.898                                | -                 |
| HCV                | Core  | 2        | 112655155 | rs199913364  | CAG    | C   | 0.980 | 0.248 | $1.2 \times 10^{-8}$  | upstream             | <i>MERTK</i>           | 0.942                                | -                 |
|                    |       | 11       | 75259052  | rs79794175   | C      | T   | 0.933 | 0.406 | $1.2 \times 10^{-8}$  | intergenic           | <i>SERPINH1</i>        | 1                                    | -                 |
| HCV                | NS3   | 6        | 115406379 | rs549795309  | C      | T   | 0.979 | 0.204 | $2.5 \times 10^{-8}$  | intergenic           | <i>RP11-282C5.1</i>    | 0.886                                | -                 |
|                    |       | 10       | 82580895  | rs144432266  | A      | C   | 0.989 | 0.158 | $1.7 \times 10^{-8}$  | intergenic           | <i>FARSBP1</i>         | 0.874                                | -                 |
| JCV                | VP1   | 6        | 32577385  | rs9271147    | T      | C   | 0.152 | 0.536 | $1.3 \times 10^{-42}$ | intergenic           | <i>HLA-DQA1</i>        | 0.998                                | rs9271525: 0.160  |
| MCV                | VP1   | 6        | 32621980  | rs17613347   | T      | C   | 0.150 | 0.613 | $1.2 \times 10^{-26}$ | intergenic           | <i>HLA-DQB1</i>        | 0.995                                | rs9268847: 0.052  |
|                    |       | 5        | 138845045 | rs1193730215 | TTATC  | T   |       | 0.259 | 1.259                 | $7.2 \times 10^{-9}$ | intergenic             | <i>ECSCR</i>                         | 0.985             |
| HTLV1 <sup>1</sup> |       | 9        | 15483425  | rs16933318   | G      | C   | 0.990 | 0.153 | $3.3 \times 10^{-8}$  | intronic             | <i>PSIP1</i>           | 0.948                                | -                 |

<sup>1</sup> Case counts for HTLV1 env and HTLV1 gag antigens were <100, therefore results are presented for HTLV1 based on seropositivity for at least one antigen

**Supplementary Table 4:** Functional annotations for lead genome-wide significant variants ( $P < 5.0 \times 10^{-8}$ ) associated with antibody response or SARS-CoV-2 test status. Expression (eQTL) and splicing quantitative trait loci (sQTL) associations with  $FDR < 0.05$  were obtained in GTEx v8 and DICE (Database of Immune Cell Expression). Plasma protein (pQTL) associations with  $P < 5.0 \times 10^{-8}$  were obtained from the Human Plasma Proteome atlas.

| Phenotype              | Chr | Position  | Variant     | Alleles |       | CADD <sup>1</sup> | RegulomeDB         |                   | eQTL (GTEx) |         | eQTL (DICE) |       | sQTL (GTEx) | pQTL     |
|------------------------|-----|-----------|-------------|---------|-------|-------------------|--------------------|-------------------|-------------|---------|-------------|-------|-------------|----------|
|                        |     |           |             | Effect  | Other |                   | Score <sup>2</sup> | Rank <sup>3</sup> | Genes       | Tissues | Genes       | Cells | Genes       | Proteins |
| CMV pp52               | 6   | 32301427  | rs115378818 | C       | T     | 4.55              | 0.29               | 5                 | -           | -       | -           | -     | -           | -        |
| EBV EA-D               | 6   | 32665840  | rs34825357  | T       | TC    | 10.63             | 0.63               | 5                 | 25          | 49      | -           | -     | -           | 12       |
| EBV EBNA               | 3   | 151114852 | rs67886110  | G       | T     | 1.55              | 0.20               | 6                 | 2           | 29      | 1           | 1     | -           | -        |
|                        | 6   | 32451762  | rs9269233   | A       | C     | 0.60              | 0.13               | 5                 | 27          | 48      | 4           | 10    | 13          | 4        |
| EBV p18                | 6   | 31486158  | 6:31486158  | GT      | G     | 0.02              | -                  | -                 | -           | -       | 1           | 5     | -           | -        |
| EBV ZEBRA              | 6   | 32637772  | rs9274728   | A       | G     | 7.92              | 0.95               | 5                 | 22          | 49      | 8           | 15    | 9           | 5        |
| HHV6 IE1A              | 7   | 139985625 | rs2429218   | T       | C     | 0.64              | 0.61               | 4                 | 1           | 1       | -           | -     | -           | -        |
|                        | 6   | 32602665  | rs139299944 | C       | CT    | 12.15             | 0.72               | 5                 | 15          | 48      | -           | -     | 9           | -        |
| HHV7 U14               | 11  | 118767564 | rs75438046  | G       | A     | 7.00              | 0.61               | 4                 | 2           | 6       | -           | -     | -           | -        |
|                        | 17  | 45794706  | rs1808192   | A       | G     | 4.18              | 0.55               | 1f                | 6           | 35      | 2           | 11    | 5           | -        |
| HSV1 1gG               | 6   | 32627852  | rs1130420   | G       | A     | 9.73              | 0.74               | 2b                | -           | -       | 8           | 15    | -           | 2        |
|                        | 10  | 91189187  | rs11203123  | A       | C     | 1.41              | 0.53               | 5                 | -           | -       | -           | -     | -           | -        |
| VZV gE/Ig <sup>1</sup> | 6   | 32623193  | rs9273325   | G       | A     | 4.91              | 0.13               | 5                 | -           | -       | 1           | 1     | -           | 15       |
| BKV VP1                | 19  | 49206462  | rs681343    | C       | T     | 0.06              | 0.13               | 5                 | 8           | 40      | 1           | 7     | 3           | 16       |
| JCV VP1                | 6   | 32589842  | rs9271525   | G       | A     | 10.73             | 0.15               | 3a                | 35          | 49      | 8           | 15    | 14          | 4        |
|                        | 3   | 18238783  | rs776170649 | CT      | C     | 15.61             | 0.35               | 6                 | -           | -       | -           | -     | -           | -        |
| MCV VP1                | 5   | 138865423 | rs7444313   | G       | A     | 1.89              | 0.36               | 6                 | 7           | 31      | -           | -     | 3           | -        |
|                        | 6   | 32429277  | rs9268847   | A       | G     | 5.57              | 0.18               | 7                 | 16          | 28      | -           | -     | 8           | -        |
| SARS-CoV-2             | 11  | 34653124  | rs286914    | A       | G     | 5.63              | 0.61               | 4                 | -           | -       | -           | -     | -           | -        |

<sup>1</sup> Combined Annotation Dependent Depletion (CADD) score: >10 corresponds to the top 10% most deleterious substitutions in the genome

<sup>2</sup> Score: ranges from 0 to 1, with 1 being most likely to be a regulatory variant. This score is based on a model that integrates functional genomics features with continuous values such as ChIP-seq signal, DNase-seq signal, information content change, and DeepSEA scores

<sup>3</sup> Rank: 1f = eQTL + TF binding / DNase peak; 2b = TF binding + any motif + DNase Footprint + DNase peak; 3a = TF binding + any motif + DNase peak; 4= TF binding + DNase peak; 5= TF binding or DNase peak; 6 or greater = minimal evidence

**Supplementary Table 5:** Significant effects ( $P < 5.0 \times 10^{-8}$ ) on plasma protein levels (pQTL) observed for lead genome-wide significant variants for viral antigen antibody response using data from the Human Plasma Proteome atlas.

| Phenotype                                       | Variant              | Target Protein                                            | $P_{\text{pQTL}}$     | Source Dataset [PMID] |
|-------------------------------------------------|----------------------|-----------------------------------------------------------|-----------------------|-----------------------|
| EBV<br>EA-D                                     | rs34825357           | Glutamate receptor 4                                      | $1.5 \times 10^{-28}$ | Sun et al. [29875488] |
|                                                 |                      | T-cell surface protein tactile                            | $6.5 \times 10^{-21}$ |                       |
|                                                 |                      | Complement C4                                             | $1.2 \times 10^{-20}$ |                       |
|                                                 |                      | cAMP-specific 3,5-cyclic phosphodiesterase 4D             | $2.8 \times 10^{-20}$ |                       |
|                                                 |                      | HLA class II histocompatibility antigen, DQ alpha 2 chain | $1.1 \times 10^{-19}$ |                       |
|                                                 |                      | Vesicle-fusing ATPase                                     | $5.9 \times 10^{-12}$ |                       |
|                                                 |                      | Beta-defensin 119                                         | $1.0 \times 10^{-10}$ |                       |
|                                                 |                      | Killer cell immunoglobulin-like receptor 2DS2             | $4.0 \times 10^{-10}$ |                       |
|                                                 |                      | Interleukin-21                                            | $4.6 \times 10^{-10}$ |                       |
|                                                 |                      | GDH/6PGL endoplasmic bifunctional protein                 | $5.9 \times 10^{-10}$ |                       |
|                                                 |                      | MHC class I polypeptide-related sequence B                | $8.3 \times 10^{-10}$ |                       |
| Trypsin-3                                       | $2.9 \times 10^{-8}$ |                                                           |                       |                       |
| EBV<br>EBNA                                     | rs9269233            | HLA class II histocompatibility antigen, DQ alpha 2 chain | $2.0 \times 10^{-21}$ | Sun et al. [29875488] |
|                                                 |                      | GDH/6PGL endoplasmic bifunctional protein                 | $3.2 \times 10^{-13}$ |                       |
|                                                 |                      | Killer cell immunoglobulin-like receptor 2DS2             | $1.3 \times 10^{-10}$ |                       |
|                                                 |                      | Ameloblastin                                              | $3.7 \times 10^{-8}$  |                       |
| EBV<br>ZEBRA                                    | rs9274728            | Complement C4                                             | $6.9 \times 10^{-16}$ | Sun et al. [29875488] |
|                                                 |                      | MHC class I polypeptide-related sequence B                | $6.6 \times 10^{-11}$ |                       |
|                                                 |                      | Interleukin-21                                            | $2.2 \times 10^{-10}$ |                       |
|                                                 |                      | Ubiquitin carboxyl-terminal hydrolase 25                  | $8.9 \times 10^{-10}$ |                       |
|                                                 |                      | T-cell surface protein tactile                            | $3.8 \times 10^{-8}$  |                       |
| HSV1                                            | rs1130420            | Trypsin-3                                                 | $7.2 \times 10^{-15}$ | Sun et al. [29875488] |
|                                                 |                      | Rac GTPase-activating protein 1                           | $1.7 \times 10^{-13}$ |                       |
| VZV                                             | rs9273325            | HLA class II histocompatibility antigen, DQ alpha 2 chain | $4.9 \times 10^{-38}$ | Sun et al. [29875488] |
|                                                 |                      | Glutamate receptor 4                                      | $6.8 \times 10^{-26}$ |                       |
|                                                 |                      | cAMP-specific 3,5-cyclic phosphodiesterase 4D             | $1.7 \times 10^{-24}$ |                       |
|                                                 |                      | MHC class I polypeptide-related sequence B                | $8.3 \times 10^{-22}$ |                       |
|                                                 |                      | Complement C4                                             | $2.0 \times 10^{-18}$ |                       |
|                                                 |                      | T-cell surface protein tactile                            | $7.6 \times 10^{-16}$ |                       |
|                                                 |                      | Trypsin-3                                                 | $2.0 \times 10^{-13}$ |                       |
|                                                 |                      | Rac GTPase-activating protein 1                           | $4.5 \times 10^{-11}$ |                       |
|                                                 |                      | Beta-defensin 119                                         | $3.6 \times 10^{-10}$ |                       |
|                                                 |                      | Interleukin-21                                            | $1.9 \times 10^{-9}$  |                       |
|                                                 |                      | Tenascin-X                                                | $2.0 \times 10^{-9}$  |                       |
|                                                 |                      | Ubiquitin-like protein ISG15                              | $3.9 \times 10^{-9}$  |                       |
|                                                 |                      | Palmitoyl-protein thioesterase 1                          | $4.5 \times 10^{-9}$  |                       |
| Polypeptide N-acetylgalactosaminyltransferase 1 | $4.6 \times 10^{-9}$ |                                                           |                       |                       |
| Coiled-coil domain-containing protein 134       | $4.6 \times 10^{-8}$ |                                                           |                       |                       |

|               |                      |                                                                         |                        |                             |
|---------------|----------------------|-------------------------------------------------------------------------|------------------------|-----------------------------|
| BKV           | rs681343             | Protein FAM3D                                                           | $1.8 \times 10^{-110}$ | Sun et al. [29875488]       |
|               |                      | Golgi membrane protein 1                                                | $1.5 \times 10^{-28}$  |                             |
|               |                      | C-C motif chemokine 15                                                  | $2.2 \times 10^{-27}$  |                             |
|               |                      | Transcobalamin-1                                                        | $1.8 \times 10^{-21}$  | Yao et al. [30111768]       |
|               |                      | Secreted and transmembrane protein 1                                    | $7.2 \times 10^{-20}$  |                             |
|               |                      | Lithostathine-1-alpha                                                   | $2.3 \times 10^{-18}$  |                             |
|               |                      | Protein FAM177A1                                                        | $5.5 \times 10^{-18}$  | Sun et al. [29875488]       |
|               |                      | Galactoside 3(4)-L-fucosyltransferase                                   | $4.0 \times 10^{-16}$  |                             |
|               |                      | Intestinal-type alkaline phosphatase                                    | $1.3 \times 10^{-15}$  |                             |
|               |                      | C-C motif chemokine 25                                                  | $1.4 \times 10^{-13}$  | Sun et al. [29875488]       |
|               |                      | Fibroblast growth factor 19 (FGF19)                                     | $2.6 \times 10^{-13}$  |                             |
|               |                      | BPI fold-containing family B member 1 (BPIFB1)                          | $5.4 \times 10^{-10}$  |                             |
|               |                      | N-acetyllactosaminide beta-1,3-N-acetylglucosaminyltransferase 2 (FUT3) | $6.8 \times 10^{-9}$   | Sun et al. [29875488]       |
|               |                      | Lactase-phlorizin hydrolase                                             | $1.2 \times 10^{-8}$   | Folkersen et al. [28369058] |
|               |                      | Tissue factor                                                           | $8.7 \times 10^{-9}$   |                             |
| Stromelysin-2 | $3.5 \times 10^{-8}$ |                                                                         |                        |                             |
| JCV           | rs9271525            | GDH/6PGL endoplasmic bifunctional protein                               | $4.2 \times 10^{-26}$  | Sun et al. [29875488]       |
|               |                      | Killer cell immunoglobulin-like receptor 2DS2                           | $2.2 \times 10^{-11}$  |                             |
|               |                      | Osteocalcin                                                             | $6.5 \times 10^{-9}$   |                             |
|               |                      | Complement factor B                                                     | $3.1 \times 10^{-8}$   |                             |



**Supplementary Table 6:** Odds ratios (OR) for the effect of lead seroreactivity variants on selected cancers, schizophrenia, and Alzheimer's disease (AD). Associations with  $P < 7.3 \times 10^{-4}$  were considered statistically significant after Bonferroni correction for the number of genetic variants and phenotypes tested.

| Antigen | Chr                | Position | Variant   | Alleles                  |       | Effect on antibody response (MFI) |        | Hematologic cancers <sup>1</sup><br>3262 cases / 410,350 controls |       | Melanoma<br>6777 cases / 410,350 controls |       | Schizophrenia <sup>2</sup><br>33,640 cases / 43,456 controls |       | AD <sup>3</sup><br>17,536 cases / 53,711 controls |                      |
|---------|--------------------|----------|-----------|--------------------------|-------|-----------------------------------|--------|-------------------------------------------------------------------|-------|-------------------------------------------|-------|--------------------------------------------------------------|-------|---------------------------------------------------|----------------------|
|         |                    |          |           | Effect                   | Other | Beta                              | (SE)   | OR                                                                | P     | OR                                        | P     | OR                                                           | P     | P                                                 |                      |
| CMV     | pp52               | 6        | 32301427  | rs115378818              | C     | T                                 | 0.633  | (0.095)                                                           | 0.809 | 0.058                                     | 0.886 | 0.12                                                         | 0.989 | 0.84                                              | 0.44                 |
| EBV     | EA-D               | 6        | 32665840  | rs34825357 <sup>†</sup>  | T     | TC                                | -0.114 | (0.017)                                                           | 0.978 | 0.45                                      | 1.054 | 0.017                                                        | 0.960 | $2.7 \times 10^{-4}$                              | 0.75                 |
| EBV     | EBNA               | 3        | 151114852 | rs67886110*              | G     | T                                 | 0.103  | (0.017)                                                           | 0.960 | 0.11                                      | 0.993 | 0.68                                                         | 1.023 | 0.037                                             | 0.068                |
|         |                    | 6        | 32451762  | rs9269233 <sup>†</sup>   | A     | C                                 | 0.315  | (0.019)                                                           | 0.878 | $2.7 \times 10^{-4}$                      | 1.078 | $2.8 \times 10^{-3}$                                         | 1.034 | $6.2 \times 10^{-3}$                              | 0.28                 |
| EBV     | VCA p18            | 6        | 31486158  | 6:31486158 <sup>†</sup>  | GT    | G                                 | 0.197  | (0.018)                                                           | 0.921 | $6.1 \times 10^{-3}$                      | 0.993 | 0.75                                                         | 1.030 | 0.020                                             | 0.016                |
| EBV     | ZEBRA              | 6        | 32637772  | rs9274728                | A     | G                                 | -0.315 | (0.018)                                                           | 0.975 | 0.35                                      | 1.060 | $3.3 \times 10^{-3}$                                         | 0.993 | 0.59                                              | $1.7 \times 10^{-3}$ |
| HHV6    | IE1A               | 7        | 139985625 | rs2429218                | T     | C                                 | 0.106  | (0.019)                                                           | 1.035 | 0.19                                      | 0.990 | 0.58                                                         | 1.024 | 0.041                                             | 0.24                 |
| HHV7    | U14                | 6        | 32602665  | rs139299944              | C     | CT                                | 0.114  | (0.017)                                                           | 1.079 | $4.1 \times 10^{-3}$                      | 0.986 | 0.43                                                         | 0.990 | 0.38                                              | -                    |
|         |                    | 11       | 118767564 | rs75438046               | G     | A                                 | 0.280  | (0.049)                                                           | 0.913 | 0.22                                      | 0.919 | 0.11                                                         | 0.955 | 0.18                                              | $4.1 \times 10^{-3}$ |
| HSV1    | 1gG                | 17       | 45794706  | rs1808192 <sup>†</sup>   | A     | G                                 | -0.099 | (0.017)                                                           | 0.989 | 0.69                                      | 0.981 | 0.32                                                         | 1.000 | 0.99                                              | 0.029                |
|         |                    | 6        | 32627852  | rs1130420 <sup>†</sup>   | G     | A                                 | -0.122 | (0.019)                                                           | 0.888 | $3.5 \times 10^{-6}$                      | 1.023 | 0.22                                                         | 1.055 | $1.8 \times 10^{-5}$                              | $1.2 \times 10^{-4}$ |
| VZV     | gE/Ig <sup>1</sup> | 10       | 91189187  | rs11203123* <sup>†</sup> | A     | C                                 | 0.512  | (0.093)                                                           | 0.948 | 0.71                                      | 0.966 | 0.75                                                         | 0.985 | 0.70                                              | 0.85                 |
|         |                    | 6        | 32623193  | rs9273325                | G     | A                                 | -0.232 | (0.021)                                                           | 0.876 | $4.4 \times 10^{-5}$                      | 0.965 | 0.12                                                         | 1.131 | $4.3 \times 10^{-15}$                             | 0.16                 |
| BKV     | VP1                | 19       | 49206462  | rs681343                 | C     | T                                 | -0.125 | (0.016)                                                           | 1.004 | 0.87                                      | 1.037 | 0.040                                                        | 0.960 | $2.5 \times 10^{-4}$                              | 0.16                 |
| JCV     | VP1                | 6        | 32589842  | rs9271525                | G     | A                                 | -0.318 | (0.031)                                                           | 0.925 | 0.026                                     | 1.015 | 0.53                                                         | 1.060 | $6.8 \times 10^{-5}$                              | $4.7 \times 10^{-3}$ |
|         |                    | 3        | 18238783  | rs776170649 <sup>†</sup> | CT    | C                                 | -0.134 | (0.024)                                                           | 1.006 | 0.86                                      | 0.975 | 0.23                                                         | 1.045 | $9.0 \times 10^{-4}$                              | 0.83                 |
| MCV     | VP1                | 5        | 138865423 | rs7444313                | G     | A                                 | 0.169  | (0.021)                                                           | 0.957 | 0.13                                      | 1.026 | 0.21                                                         | 1.019 | 0.12                                              | 0.033                |
|         |                    | 6        | 32429277  | rs9268847                | A     | G                                 | -0.195 | (0.022)                                                           | 1.018 | 0.54                                      | 0.949 | $8.3 \times 10^{-3}$                                         | 0.968 | $8.4 \times 10^{-3}$                              | 0.14                 |

<sup>1</sup> Cancer types included: non-Hodgkin lymphoma and lymphocytic leukemia

<sup>2</sup> Estimates obtained from a meta-analysis of the UK Biobank and Genetic Epidemiology Research on Aging cohorts [Rashkin et al. (2019) *bioRxiv* 635367]

<sup>3</sup> Summary statistics for European ancestry subjects were obtained from Lam, Chen et al. *Nat Genet.* (2019) 51(12):1670-1678 [PMID: 31740837]

<sup>4</sup> Summary statistics obtained from Jun et al. *Mol Psychiatry.* (2016) 21(1):108-17 [PMID: 25778476]

<sup>†</sup> Proxies for unavailable variants: rs2647006 for rs34825357 (schizophrenia and AD; LD  $r^2=0.99$ ); rs7755774 for rs9269233 (AD; LD  $r^2=0.71$ ); rs3093986 for 6:31486158\_GT\_G (AD; LD  $r^2=0.74$ ); rs7219420 for rs1808192 (AD; LD  $r^2=0.87$ ); rs4713572 for rs1130420 (AD; LD  $r^2=0.91$ ); rs11203124 for rs11203123 (AD; LD  $r^2=1.00$ ); rs7618405 for rs776170649 (AD; LD  $r^2=0.99$ )

\* Multi-allelic variants: rs67886110 (G/T and G/C) and rs11203123 (A/C and A/AC)

**Supplementary Table 7:** Independent sentinel variants in the HLA region identified by clumping (LD  $r^2 < 0.05 \pm 500\text{kb}$ ) associations with  $P < 5 \times 10^{-8}$  for each antigen response phenotype.

| Antigen  | Chr     | Position | Variant     | Alleles    |       | EAF   | Beta   | (SE)    | P                     | INFO                  | Clump Size <sup>1</sup> |      |
|----------|---------|----------|-------------|------------|-------|-------|--------|---------|-----------------------|-----------------------|-------------------------|------|
|          |         |          |             | Effect     | Other |       |        |         |                       |                       |                         |      |
| CMV pp52 | 6       | 32301427 | rs115378818 | C          | T     | 0.986 | 0.633  | (0.095) | $2.8 \times 10^{-11}$ | 0.731                 | 2                       |      |
|          | 6       | 32665840 | rs34825357  | T          | TC    | 0.409 | -0.114 | (0.017) | $2.0 \times 10^{-11}$ | 0.998                 | 779                     |      |
| EBV EA-D | 6       | 31451370 | rs3132470   | A          | G     | 0.855 | 0.159  | (0.024) | $3.4 \times 10^{-11}$ | 1.000                 | 207                     |      |
|          | 6       | 29842444 | rs1611657   | G          | A     | 0.458 | 0.105  | (0.017) | $6.9 \times 10^{-10}$ | 0.996                 | 19                      |      |
|          | 6       | 32583876 | rs117503706 | G          | A     | 0.986 | -0.423 | (0.072) | $4.8 \times 10^{-9}$  | 0.912                 | 15                      |      |
|          | 6       | 30764907 | rs1264377   | G          | A     | 0.818 | 0.119  | (0.022) | $4.7 \times 10^{-8}$  | 1                     | 0                       |      |
|          | 6       | 32451762 | rs9269233   | A          | C     | 0.249 | 0.315  | (0.019) | $3.5 \times 10^{-61}$ | 0.961                 | 3885                    |      |
| EBV EBNA | 6       | 32628432 | rs9273507   | A          | G     | 0.570 | 0.167  | (0.017) | $7.5 \times 10^{-23}$ | 0.994                 | 228                     |      |
|          | 6       | 31884823 | rs3130682   | T          | C     | 0.148 | 0.220  | (0.023) | $3.0 \times 10^{-21}$ | 0.993                 | 269                     |      |
|          | 6       | 32390436 | rs143810596 | T          | G     | 0.977 | -0.538 | (0.058) | $1.3 \times 10^{-20}$ | 0.989                 | 51                      |      |
|          | 6       | 31297772 | rs9265517   | C          | T     | 0.233 | 0.172  | (0.020) | $4.5 \times 10^{-18}$ | 0.975                 | 967                     |      |
|          | 6       | 33048628 | rs1042136   | A          | C     | 0.838 | 0.176  | (0.023) | $1.3 \times 10^{-14}$ | 0.991                 | 158                     |      |
|          | 6       | 31835164 | rs693906    | G          | C     | 0.842 | 0.177  | (0.023) | $2.0 \times 10^{-14}$ | 0.984                 | 130                     |      |
|          | 6       | 31892641 | rs9267677   | T          | C     | 0.905 | 0.206  | (0.028) | $3.6 \times 10^{-13}$ | 1                     | 58                      |      |
|          | 6       | 32201469 | rs41315395  | C          | A     | 0.855 | -0.167 | (0.023) | $1.2 \times 10^{-12}$ | 0.997                 | 3                       |      |
|          | 6       | 32387809 | rs2395163   | T          | C     | 0.779 | 0.144  | (0.020) | $2.0 \times 10^{-12}$ | 1                     | 25                      |      |
|          | 6       | 29822779 | 6:29822779  | AAAAC      | A     | 0.365 | 0.114  | (0.017) | $4.1 \times 10^{-11}$ | 0.999                 | 113                     |      |
|          | 6       | 33083096 | rs6457714   | T          | A     | 0.789 | -0.132 | (0.020) | $6.8 \times 10^{-11}$ | 0.997                 | 35                      |      |
|          | 6       | 32609147 | rs12722051  | A          | T     | 0.795 | 0.127  | (0.021) | $1.3 \times 10^{-9}$  | 0.989                 | 7                       |      |
|          | 6       | 31198786 | rs3130935   | A          | G     | 0.621 | 0.098  | (0.017) | $1.5 \times 10^{-8}$  | 1.000                 | 7                       |      |
|          | 6       | 32623017 | rs28468461  | T          | C     | 0.969 | -0.256 | (0.046) | $2.9 \times 10^{-8}$  | 0.993                 | 0                       |      |
|          | 6       | 32542378 | rs116206645 | T          | A     | 0.979 | 0.403  | (0.074) | $5.0 \times 10^{-8}$  | 0.699                 | 0                       |      |
|          | EBV p18 | 6        | 31486158    | 6:31486158 | GT    | G     | 0.245  | 0.197   | (0.018)               | $7.1 \times 10^{-27}$ | 0.994                   | 1651 |
|          |         | 6        | 32589978    | rs9271536  | A     | T     | 0.179  | 0.200   | (0.020)               | $3.9 \times 10^{-23}$ | 0.999                   | 2455 |
| 6        |         | 32069806 | rs3096695   | G          | C     | 0.145 | 0.208  | (0.022) | $1.6 \times 10^{-20}$ | 0.997                 | 16                      |      |
| 6        |         | 30921417 | 6:30921417  | GA         | G     | 0.119 | 0.165  | (0.025) | $2.7 \times 10^{-11}$ | 0.975                 | 42                      |      |
| 6        |         | 30727983 | rs3095339   | A          | G     | 0.722 | 0.112  | (0.017) | $7.3 \times 10^{-11}$ | 1.000                 | 24                      |      |
| 6        |         | 32797876 | rs241436    | A          | G     | 0.549 | 0.099  | (0.016) | $2.4 \times 10^{-10}$ | 1                     | 2                       |      |
| 6        |         | 31379391 | rs3828879   | C          | T     | 0.876 | 0.147  | (0.024) | $5.1 \times 10^{-10}$ | 1.000                 | 3                       |      |
| 6        |         | 32206539 | rs3134937   | C          | T     | 0.751 | 0.112  | (0.018) | $6.3 \times 10^{-10}$ | 0.981                 | 20                      |      |
| 6        |         | 33073440 | rs2064475   | G          | A     | 0.768 | 0.111  | (0.019) | $2.2 \times 10^{-9}$  | 1.000                 | 21                      |      |
| 6        |         | 32045864 | rs781341398 | GAA        | G     | 0.966 | -0.277 | (0.046) | $2.7 \times 10^{-9}$  | 0.922                 | 2                       |      |
| 6        |         | 32754876 | rs116309362 | T          | C     | 0.976 | -0.335 | (0.057) | $3.5 \times 10^{-9}$  | 0.895                 | 1                       |      |
| 6        |         | 26370707 | rs9379862   | T          | C     | 0.743 | 0.103  | (0.018) | $5.6 \times 10^{-9}$  | 1.000                 | 1                       |      |
| 6        |         | 31448564 | rs3099843   | G          | T     | 0.855 | 0.126  | (0.022) | $1.1 \times 10^{-8}$  | 1.000                 | 12                      |      |
| 6        |         | 31362207 | rs1052409   | T          | C     | 0.845 | 0.125  | (0.022) | $1.2 \times 10^{-8}$  | 0.978                 | 7                       |      |
| 6        |         | 28039586 | rs4713135   | G          | A     | 0.761 | 0.102  | (0.019) | $3.4 \times 10^{-8}$  | 1                     | 0                       |      |
| 6        |         | 32637772 | rs9274728   | A          | G     | 0.718 | -0.315 | (0.018) | $4.7 \times 10^{-67}$ | 0.995                 | 3836                    |      |

|              |          |             |             |           |       |        |         |                       |                       |                       |      |    |
|--------------|----------|-------------|-------------|-----------|-------|--------|---------|-----------------------|-----------------------|-----------------------|------|----|
| EBV<br>ZEBRA | 6        | 32045864    | rs781341398 | GAA       | G     | 0.966  | -0.428  | (0.048)               | $5.1 \times 10^{-19}$ | 0.922                 | 20   |    |
|              | 6        | 32211085    | rs412657    | T         | G     | 0.622  | 0.145   | (0.017)               | $1.0 \times 10^{-17}$ | 1                     | 321  |    |
|              | 6        | 32774954    | rs6917611   | G         | C     | 0.608  | 0.142   | (0.017)               | $1.9 \times 10^{-17}$ | 1.000                 | 198  |    |
|              | 6        | 32634588    | rs113140854 | C         | T     | 0.983  | -0.534  | (0.067)               | $1.5 \times 10^{-15}$ | 0.827                 | 253  |    |
|              | 6        | 31672242    | rs28366157  | A         | G     | 0.937  | -0.266  | (0.034)               | $2.3 \times 10^{-15}$ | 0.997                 | 374  |    |
|              | 6        | 31418810    | rs3131623   | T         | A     | 0.817  | 0.167   | (0.021)               | $2.6 \times 10^{-15}$ | 0.992                 | 610  |    |
|              | 6        | 29923351    | rs2904758   | G         | A     | 0.280  | 0.144   | (0.018)               | $5.0 \times 10^{-15}$ | 0.990                 | 97   |    |
|              | 6        | 32635948    | rs541213498 | C         | T     | 0.987  | -0.586  | (0.078)               | $4.8 \times 10^{-14}$ | 0.780                 | 5    |    |
|              | 6        | 32626702    | rs35779483  | A         | G     | 0.693  | -0.135  | (0.018)               | $6.1 \times 10^{-14}$ | 0.999                 | 33   |    |
|              | 6        | 30820373    | rs2263298   | C         | T     | 0.849  | 0.154   | (0.023)               | $2.4 \times 10^{-11}$ | 1.000                 | 200  |    |
|              | 6        | 33017502    | rs3130177   | G         | A     | 0.717  | -0.121  | (0.018)               | $3.1 \times 10^{-11}$ | 0.996                 | 5    |    |
|              | 6        | 31150844    | rs138206303 | A         | AGT   | 0.883  | -0.167  | (0.025)               | $4.8 \times 10^{-11}$ | 0.975                 | 22   |    |
|              | 6        | 31928799    | rs419788    | T         | C     | 0.324  | -0.113  | (0.017)               | $1.0 \times 10^{-10}$ | 1                     | 8    |    |
|              | 6        | 32581008    | rs3129747   | T         | C     | 0.698  | -0.108  | (0.018)               | $1.2 \times 10^{-9}$  | 0.989                 | 8    |    |
|              | 6        | 30434999    | rs2516670   | G         | A     | 0.160  | 0.132   | (0.022)               | $3.3 \times 10^{-9}$  | 1                     | 2    |    |
|              | 6        | 33045823    | rs2073520   | A         | G     | 0.868  | 0.145   | (0.025)               | $5.7 \times 10^{-9}$  | 0.972                 | 1    |    |
| 6            | 32707395 | rs28371351  | G           | A         | 0.988 | -0.519 | (0.095) | $4.2 \times 10^{-8}$  | 0.647                 | 0                     |      |    |
| HHV7         | 6        | 32602665    | rs139299944 | C         | CT    | 0.655  | 0.114   | (0.017)               | $1.5 \times 10^{-11}$ | 0.998                 | 437  |    |
| HSV1         | 6        | 32627852    | rs1130420   | G         | A     | 0.583  | -0.122  | (0.019)               | $2.5 \times 10^{-10}$ | 0.976                 | 61   |    |
| VZV          | 6        | 32623193    | rs9273325   | G         | A     | 0.831  | -0.232  | (0.021)               | $8.2 \times 10^{-28}$ | 0.998                 | 2708 |    |
|              | 6        | 31323506    | rs4990036   | C         | T     | 0.851  | -0.240  | (0.023)               | $4.5 \times 10^{-26}$ | 0.997                 | 972  |    |
|              | 6        | 32014828    | rs433061    | G         | A     | 0.869  | -0.249  | (0.024)               | $6.5 \times 10^{-26}$ | 0.999                 | 69   |    |
|              | 6        | 30743729    | rs3130668   | G         | A     | 0.855  | -0.228  | (0.023)               | $1.9 \times 10^{-22}$ | 0.978                 | 271  |    |
|              | 6        | 29986324    | rs3115631   | T         | A     | 0.873  | -0.229  | (0.025)               | $4.1 \times 10^{-20}$ | 0.955                 | 1442 |    |
|              | 6        | 29356331    | rs9257809   | A         | G     | 0.875  | -0.216  | (0.024)               | $1.5 \times 10^{-18}$ | 1                     | 147  |    |
|              | 6        | 28734676    | rs1233604   | G         | A     | 0.882  | -0.215  | (0.025)               | $2.5 \times 10^{-17}$ | 1                     | 291  |    |
|              | 6        | 28214698    | rs17720293  | C         | T     | 0.866  | -0.191  | (0.024)               | $2.1 \times 10^{-15}$ | 1                     | 192  |    |
|              | 6        | 27556141    | rs13201294  | A         | T     | 0.870  | -0.182  | (0.024)               | $7.1 \times 10^{-14}$ | 0.996                 | 94   |    |
|              | 6        | 26743531    | rs13211434  | G         | C     | 0.878  | -0.188  | (0.025)               | $1.1 \times 10^{-13}$ | 0.938                 | 241  |    |
|              | 6        | 26189356    | rs13204572  | G         | C     | 0.896  | -0.166  | (0.027)               | $5.8 \times 10^{-10}$ | 0.996                 | 37   |    |
|              | 6        | 32589842    | rs9271525   | G         | A     | 0.163  | -0.137  | (0.022)               | $1.0 \times 10^{-9}$  | 0.977                 | 229  |    |
|              | 6        | 30020252    | rs546626159 | A         | ATT   | 0.749  | 0.108   | (0.020)               | $3.0 \times 10^{-8}$  | 0.968                 | 0    |    |
|              | 6        | 32589842    | rs9271525   | G         | A     | 0.163  | -0.318  | (0.031)               | $3.9 \times 10^{-24}$ | 0.977                 | 2335 |    |
|              | JCV      | 6           | 32080146    | rs3130342 | A     | C      | 0.149   | -0.245                | (0.032)               | $1.3 \times 10^{-14}$ | 1    | 43 |
|              | 6        | 31574306    | rs372079459 | T         | TAA   | 0.198  | -0.163  | (0.028)               | $5.0 \times 10^{-9}$  | 0.972                 | 2    |    |
| 6            | 32429277 | rs9268847   | A           | G         | 0.750 | -0.195 | (0.022) | $2.4 \times 10^{-19}$ | 0.995                 | 2450                  |      |    |
| 6            | 32760665 | rs113322198 | C           | CACTT     | 0.224 | -0.196 | (0.024) | $2.3 \times 10^{-16}$ | 0.996                 | 328                   |      |    |
| 6            | 32232358 | rs9268070   | T           | C         | 0.149 | -0.216 | (0.029) | $5.0 \times 10^{-14}$ | 0.999                 | 38                    |      |    |
| MCV          | 6        | 29924127    | rs148584120 | T         | C     | 0.958  | 0.375   | (0.052)               | $7.7 \times 10^{-13}$ | 0.972                 | 160  |    |
| 6            | 30475514 | 6:30475514  | TGTGC       | T         | C     | 0.959  | 0.320   | (0.052)               | $9.6 \times 10^{-10}$ | 0.966                 | 10   |    |
| 6            | 31561211 | rs2736190   | T           | C         | 0.269 | -0.134 | (0.022) | $2.1 \times 10^{-9}$  | 0.993                 | 5                     |      |    |
| 6            | 27763714 | rs76148407  | C           | G         | 0.966 | 0.299  | (0.055) | $4.8 \times 10^{-8}$  | 0.971                 | 0                     |      |    |

**Supplementary Table 8:** Conditionally independent genome-wide significant ( $P_{\text{cond}} < 5 \times 10^{-8}$ ) variants in the HLA identified through forward iterative conditional analyses for each antigen response phenotype.

| Antigen      | Round <sup>1</sup> | Chr | Position | Variant     | Alleles |       | EAF   | Beta   | (SE)    | $P_{\text{cond}}$     | INFO  |
|--------------|--------------------|-----|----------|-------------|---------|-------|-------|--------|---------|-----------------------|-------|
|              |                    |     |          |             | Effect  | Other |       |        |         |                       |       |
| EBV<br>EBNA  | 0                  | 6   | 32451762 | rs9269233   | A       | C     | 0.249 | 0.315  | (0.019) | $3.5 \times 10^{-61}$ | 0.961 |
|              | 1                  | 6   | 32602665 | rs139299944 | C       | CT    | 0.655 | -0.160 | (0.017) | $5.9 \times 10^{-21}$ | 0.998 |
|              | 2                  | 6   | 33045272 | rs6457711   | C       | A     | 0.752 | -0.129 | (0.019) | $1.3 \times 10^{-11}$ | 0.994 |
|              | 3                  | 6   | 32626019 | rs9273358   | C       | T     | 0.548 | 0.110  | (0.017) | $9.0 \times 10^{-11}$ | 0.996 |
|              | 4                  | 6   | 32626451 | rs28414666  | G       | A     | 0.789 | 0.221  | (0.035) | $4.8 \times 10^{-10}$ | 0.997 |
|              | 5                  | 6   | 33047612 | rs3097671   | G       | C     | 0.835 | 0.133  | (0.022) | $2.1 \times 10^{-9}$  | 1     |
| EBV<br>ZEBRA | 0                  | 6   | 32637772 | rs9274728   | A       | G     | 0.718 | -0.315 | (0.018) | $4.7 \times 10^{-67}$ | 0.995 |
|              | 1                  | 6   | 29923351 | rs2904758   | G       | A     | 0.280 | 0.115  | (0.018) | $2.2 \times 10^{-10}$ | 0.990 |
|              | 2                  | 6   | 33034507 | rs35683320  | G       | A     | 0.825 | 0.129  | (0.022) | $1.9 \times 10^{-9}$  | 0.982 |
|              | 3                  | 6   | 32783405 | rs1383258   | C       | T     | 0.962 | 0.235  | (0.042) | $3.3 \times 10^{-8}$  | 1.000 |
| EBV p18      | 0                  | 6   | 31486158 | 6:31486158  | GT      | G     | 0.245 | 0.197  | (0.018) | $7.1 \times 10^{-27}$ | 0.994 |
|              | 1                  | 6   | 31247169 | rs6917363   | G       | A     | 0.431 | 0.102  | (0.016) | $2.7 \times 10^{-10}$ | 0.999 |
|              | 2                  | 6   | 32582513 | rs9271325   | C       | G     | 0.527 | 0.099  | (0.016) | $7.3 \times 10^{-10}$ | 1.000 |
|              | 3                  | 6   | 31356536 | rs66479476  | A       | G     | 0.784 | 0.110  | (0.020) | $3.9 \times 10^{-8}$  | 0.963 |
| MCV          | 0                  | 6   | 32429277 | rs9268847   | A       | G     | 0.750 | -0.195 | (0.022) | $2.4 \times 10^{-19}$ | 0.995 |
|              | 1                  | 6   | 29924127 | rs148584120 | T       | C     | 0.958 | 0.350  | (0.052) | $1.6 \times 10^{-11}$ | 0.972 |
|              | 2                  | 6   | 32797488 | rs4148874   | C       | T     | 0.264 | -0.158 | (0.022) | $1.1 \times 10^{-12}$ | 1     |
| EBV EA-D     | 0                  | 6   | 32665840 | rs34825357  | T       | TC    | 0.409 | -0.114 | (0.017) | $2.0 \times 10^{-11}$ | 0.998 |
|              | 1                  | 6   | 32655730 | rs3129783   | A       | G     | 0.471 | 0.100  | (0.017) | $8.4 \times 10^{-9}$  | 0.980 |
| CMV pp52     | 0                  | 6   | 32301427 | rs115378818 | C       | T     | 0.978 | 0.633  | (0.095) | $2.8 \times 10^{-11}$ | 0.731 |
| HHV7         | 0                  | 6   | 32602665 | rs139299944 | C       | CT    | 0.655 | 0.114  | (0.017) | $1.5 \times 10^{-11}$ | 0.998 |
| HSV1         | 0                  | 6   | 32627852 | rs1130420   | G       | A     | 0.583 | -0.122 | (0.019) | $2.5 \times 10^{-10}$ | 0.976 |
| VZV          | 0                  | 6   | 32589842 | rs9271525   | G       | A     | 0.831 | -0.318 | (0.031) | $3.9 \times 10^{-24}$ | 0.977 |
| JCV          | 0                  | 6   | 32623193 | rs9273325   | G       | A     | 0.163 | -0.232 | (0.021) | $8.2 \times 10^{-28}$ | 0.998 |

<sup>1</sup> Conditional analysis round. Round 0 corresponds to results from unconditional analyses (not adjusted for any SNPs/indels).

**Supplementary Table 9:** Forty independent sentinel variants in the HLA region identified by clumping (LD  $r^2 < 0.05$   $\pm 500$ kb) associations with  $P < 5 \times 10^{-8}$  across 10 antigen response phenotypes.

| Primary Phenotype | Chr | Position | Variant     | Alleles |       | EAF   | Beta   | (SE)    | P                     | INFO  | Clump Size <sup>1</sup> |
|-------------------|-----|----------|-------------|---------|-------|-------|--------|---------|-----------------------|-------|-------------------------|
|                   |     |          |             | Effect  | Other |       |        |         |                       |       |                         |
| EBV ZEBRA         | 6   | 32637772 | rs9274728   | G       | A     | 0.718 | -0.315 | (0.018) | $4.7 \times 10^{-67}$ | 0.995 | 14065                   |
| EBV EBNA          | 6   | 32633879 | rs9274490   | G       | A     | 0.742 | 0.259  | (0.019) | $1.6 \times 10^{-40}$ | 0.997 | 4788                    |
| EBV EBNA          | 6   | 32608521 | rs6907155   | A       | C     | 0.907 | -0.317 | (0.029) | $2.9 \times 10^{-27}$ | 0.945 | 152                     |
| EBV p18           | 6   | 31486158 | 6:31486158  | G       | GT    | 0.245 | 0.197  | (0.018) | $7.1 \times 10^{-27}$ | 0.994 | 4087                    |
| VZV               | 6   | 31323506 | rs4990036   | T       | C     | 0.851 | -0.240 | (0.023) | $4.5 \times 10^{-26}$ | 0.997 | 1022                    |
| VZV               | 6   | 32014828 | rs433061    | A       | G     | 0.869 | -0.249 | (0.024) | $6.5 \times 10^{-26}$ | 0.999 | 323                     |
| VZV               | 6   | 30743729 | rs3130668   | A       | G     | 0.855 | -0.228 | (0.023) | $1.9 \times 10^{-22}$ | 0.978 | 509                     |
| EBV EBNA          | 6   | 32006317 | rs6468      | T       | C     | 0.197 | 0.195  | (0.021) | $1.4 \times 10^{-20}$ | 0.963 | 353                     |
| VZV               | 6   | 29986324 | rs3115631   | A       | T     | 0.873 | -0.229 | (0.025) | $4.1 \times 10^{-20}$ | 0.955 | 1499                    |
| EBV ZEBRA         | 6   | 32045864 | rs781341398 | G       | GAA   | 0.966 | -0.428 | (0.048) | $5.1 \times 10^{-19}$ | 0.922 | 9                       |
| VZV               | 6   | 29356331 | rs9257809   | G       | A     | 0.875 | -0.216 | (0.024) | $1.5 \times 10^{-18}$ | 1     | 147                     |
| EBV p18           | 6   | 32786917 | rs3763354   | A       | G     | 0.225 | 0.160  | (0.018) | $4.6 \times 10^{-18}$ | 1     | 687                     |
| VZV               | 6   | 28734676 | rs1233604   | A       | G     | 0.882 | -0.215 | (0.025) | $2.5 \times 10^{-17}$ | 1     | 291                     |
| EBV ZEBRA         | 6   | 32634588 | rs113140854 | T       | C     | 0.983 | -0.534 | (0.067) | $1.5 \times 10^{-15}$ | 0.827 | 257                     |
| VZV               | 6   | 28214698 | rs17720293  | T       | C     | 0.866 | -0.191 | (0.024) | $2.1 \times 10^{-15}$ | 1     | 193                     |
| EBV ZEBRA         | 6   | 31672242 | rs28366157  | G       | A     | 0.937 | -0.266 | (0.034) | $2.3 \times 10^{-15}$ | 0.997 | 197                     |
| EBV EBNA          | 6   | 33048628 | rs1042136   | C       | A     | 0.838 | 0.176  | (0.023) | $1.3 \times 10^{-14}$ | 0.991 | 185                     |
| MCV               | 6   | 32630837 | 6:32630837  | T       | G     | 0.891 | -0.233 | (0.030) | $1.5 \times 10^{-14}$ | 0.959 | 162                     |
| EBV EBNA          | 6   | 32551368 | rs138008524 | G       | A     | 0.985 | -0.625 | (0.081) | $1.9 \times 10^{-14}$ | 0.666 | 0                       |
| EBV ZEBRA         | 6   | 32635948 | rs541213498 | T       | C     | 0.987 | -0.586 | (0.078) | $4.8 \times 10^{-14}$ | 0.780 | 2                       |
| VZV               | 6   | 27556141 | rs13201294  | T       | A     | 0.870 | -0.182 | (0.024) | $7.1 \times 10^{-14}$ | 0.996 | 94                      |
| VZV               | 6   | 26743531 | rs13211434  | C       | G     | 0.878 | -0.188 | (0.025) | $1.1 \times 10^{-13}$ | 0.938 | 243                     |
| EBV ZEBRA         | 6   | 29796768 | rs1632940   | C       | T     | 0.227 | 0.145  | (0.020) | $2.3 \times 10^{-13}$ | 0.991 | 268                     |
| EBV EBNA          | 6   | 31892641 | rs9267677   | C       | T     | 0.905 | 0.206  | (0.028) | $3.6 \times 10^{-13}$ | 1     | 53                      |
| EBV p18           | 6   | 30921417 | 6:30921417  | G       | GA    | 0.119 | 0.165  | (0.025) | $2.7 \times 10^{-11}$ | 0.975 | 40                      |
| EBV EBNA          | 6   | 32598090 | rs1281943   | C       | T     | 0.913 | 0.211  | (0.032) | $4.0 \times 10^{-11}$ | 0.919 | 16                      |
| EBV ZEBRA         | 6   | 31150844 | rs138206303 | AGT     | A     | 0.883 | -0.167 | (0.025) | $4.8 \times 10^{-11}$ | 0.975 | 31                      |
| MCV               | 6   | 30364587 | rs2516687   | T       | A     | 0.960 | 0.341  | (0.052) | $5.3 \times 10^{-11}$ | 1     | 26                      |
| EBV EBNA          | 6   | 33083096 | rs6457714   | A       | T     | 0.789 | -0.132 | (0.020) | $6.8 \times 10^{-11}$ | 0.997 | 39                      |
| VZV               | 6   | 32853288 | rs2244447   | G       | C     | 0.592 | -0.106 | (0.017) | $2.9 \times 10^{-10}$ | 0.995 | 3                       |
| EBV EBNA          | 6   | 32965942 | rs176248    | A       | G     | 0.707 | 0.115  | (0.018) | $3.2 \times 10^{-10}$ | 1     | 1                       |
| EBV p18           | 6   | 31379391 | rs3828879   | T       | C     | 0.876 | 0.147  | (0.024) | $5.1 \times 10^{-10}$ | 1.000 | 0                       |
| VZV               | 6   | 26189356 | rs13204572  | C       | G     | 0.896 | -0.166 | (0.027) | $5.8 \times 10^{-10}$ | 0.996 | 37                      |
| EBV EA-D          | 6   | 32583876 | rs117503706 | A       | G     | 0.986 | -0.423 | (0.072) | $4.8 \times 10^{-9}$  | 0.912 | 15                      |
| EBV EBNA          | 6   | 32587835 | rs71542419  | A       | C     | 0.916 | -0.168 | (0.029) | $9.5 \times 10^{-9}$  | 0.973 | 6                       |
| EBV p18           | 6   | 31362207 | rs1052409   | C       | T     | 0.845 | 0.125  | (0.022) | $1.2 \times 10^{-8}$  | 0.978 | 7                       |
| EBV EBNA          | 6   | 32722961 | rs71565347  | A       | G     | 0.983 | 0.374  | (0.067) | $2.7 \times 10^{-8}$  | 0.991 | 3                       |

|           |   |          |             |   |   |       |        |         |                      |       |   |
|-----------|---|----------|-------------|---|---|-------|--------|---------|----------------------|-------|---|
| EBV ZEBRA | 6 | 32707395 | rs28371351  | A | G | 0.988 | -0.519 | (0.095) | $4.2 \times 10^{-8}$ | 0.647 | 0 |
| MCV       | 6 | 27763714 | rs76148407  | G | C | 0.966 | 0.299  | (0.055) | $4.8 \times 10^{-8}$ | 0.971 | 0 |
| EBV EBNA  | 6 | 32542378 | rs116206645 | A | T | 0.979 | 0.403  | (0.074) | $5.0 \times 10^{-8}$ | 0.699 | 0 |

<sup>1</sup> Clump size refers to the number of non-independent (LD  $r^2 > 0.05$ ) variants clumped together with the sentinel variant

**Supplementary Table 10:** Associations from conditional analyses of classical HLA alleles associated with EBV ZEBRA antigen response at the Bonferroni-corrected threshold of  $P < 5 \times 10^{-4}$ . Independent alleles identified at each round are in bold.

| Allele            | Unconditional (Round 0) |                |                                         | Conditional Round 1 |                |                                         | Conditional Round 2 |                |                                         | Conditional Round 3 |                |                                         | Conditional Round 4 |                |                                        | Conditional Round 5 |         |                      |
|-------------------|-------------------------|----------------|-----------------------------------------|---------------------|----------------|-----------------------------------------|---------------------|----------------|-----------------------------------------|---------------------|----------------|-----------------------------------------|---------------------|----------------|----------------------------------------|---------------------|---------|----------------------|
|                   | Beta                    | (SE)           | P                                       | Beta                | (SE)           | $P_{\text{cond}}$                       | Beta                | (S)E           | $P_{\text{cond}}$                       | Beta                | (SE)           | $P_{\text{cond}}$                       | Beta                | (SE)           | $P_{\text{cond}}$                      | Beta                | (SE)    | $P_{\text{cond}}$    |
| <b>DRB4*99:01</b> | <b>-0.246</b>           | <b>(0.017)</b> | <b><math>1.4 \times 10^{-46}</math></b> | -                   | -              | -                                       | -                   | -              | -                                       | -                   | -              | -                                       | -                   | -              | -                                      | -                   | -       | -                    |
| <b>DQB1*04:02</b> | 0.415                   | (0.056)        | $1.3 \times 10^{-13}$                   | <b>0.504</b>        | <b>(0.055)</b> | <b><math>1.0 \times 10^{-19}</math></b> | -                   | -              | -                                       | -                   | -              | -                                       | -                   | -              | -                                      | -                   | -       | -                    |
| <b>DRB1*04:04</b> | 0.508                   | (0.042)        | $6.8 \times 10^{-34}$                   | 0.378               | (0.043)        | $1.1 \times 10^{-18}$                   | <b>0.376</b>        | <b>(0.042)</b> | <b><math>1.1 \times 10^{-18}</math></b> | -                   | -              | -                                       | -                   | -              | -                                      | -                   | -       | -                    |
| <b>DQA1*02:01</b> | 0.254                   | (0.023)        | $4.9 \times 10^{-27}$                   | 0.096               | (0.028)        | $6.3 \times 10^{-4}$                    | 0.098               | (0.028)        | $4.4 \times 10^{-4}$                    | <b>0.187</b>        | <b>(0.029)</b> | <b><math>1.1 \times 10^{-10}</math></b> | -                   | -              | -                                      | -                   | -       | -                    |
| <b>A*03:01</b>    | 0.107                   | (0.024)        | $6.2 \times 10^{-6}$                    | 0.125               | (0.023)        | $8.4 \times 10^{-8}$                    | 0.128               | (0.023)        | $3.2 \times 10^{-8}$                    | 0.125               | (0.023)        | $5.8 \times 10^{-8}$                    | <b>0.129</b>        | <b>(0.023)</b> | <b><math>1.9 \times 10^{-8}</math></b> | -                   | -       | -                    |
| DRB3*99:01        | 0.202                   | (0.017)        | $7.4 \times 10^{-32}$                   | 0.100               | (0.020)        | $6.7 \times 10^{-7}$                    | 0.067               | (0.020)        | $9.5 \times 10^{-4}$                    | 0.063               | (0.020)        | $2.0 \times 10^{-3}$                    | 0.060               | (0.020)        | $2.7 \times 10^{-3}$                   | 0.043               | (0.020) | 0.036                |
| DRB1*07:01        | 0.251                   | (0.023)        | $1.3 \times 10^{-26}$                   | 0.093               | (0.028)        | $9.2 \times 10^{-4}$                    | 0.094               | (0.028)        | $7.1 \times 10^{-4}$                    | 0.184               | (0.029)        | $2.4 \times 10^{-10}$                   | -0.038              | (0.185)        | 0.84                                   | -0.050              | (0.184) | 0.79                 |
| DQB1*02:02        | 0.300                   | (0.030)        | $4.5 \times 10^{-23}$                   | 0.128               | (0.034)        | $1.5 \times 10^{-4}$                    | 0.135               | (0.034)        | $6.1 \times 10^{-5}$                    | 0.217               | (0.034)        | $2.8 \times 10^{-10}$                   | 0.115               | (0.053)        | 0.029                                  | 0.120               | (0.053) | 0.022                |
| DRB4*01:01        | 0.293                   | (0.030)        | $7.9 \times 10^{-22}$                   | 0.137               | (0.033)        | $3.2 \times 10^{-5}$                    | 0.139               | (0.033)        | $2.3 \times 10^{-5}$                    | 0.200               | (0.033)        | $1.9 \times 10^{-9}$                    | 0.114               | (0.040)        | $4.7 \times 10^{-3}$                   | 0.112               | (0.040) | $5.7 \times 10^{-3}$ |
| DQB1*03:02        | 0.251                   | (0.027)        | $5.2 \times 10^{-21}$                   | 0.103               | (0.029)        | $4.4 \times 10^{-4}$                    | 0.107               | (0.029)        | $2.6 \times 10^{-4}$                    | -0.057              | (0.035)        | 0.10                                    | 0.060               | (0.040)        | 0.13                                   | 0.057               | (0.040) | 0.15                 |
| DRB4*01:03        | 0.173                   | (0.019)        | $7.0 \times 10^{-20}$                   | -0.142              | (0.032)        | $1.1 \times 10^{-5}$                    | -0.144              | (0.032)        | $8.1 \times 10^{-6}$                    | -0.194              | (0.032)        | $2.2 \times 10^{-9}$                    | -0.112              | (0.039)        | $3.9 \times 10^{-3}$                   | -0.110              | (0.039) | $4.7 \times 10^{-3}$ |
| DQA1*05:01        | -0.169                  | (0.019)        | $5.7 \times 10^{-18}$                   | -0.067              | (0.021)        | $1.4 \times 10^{-3}$                    | -0.043              | (0.021)        | 0.043                                   | -0.039              | (0.021)        | 0.066                                   | -0.038              | (0.021)        | 0.074                                  | -0.019              | (0.021) | 0.36                 |
| DQA1*03:01        | 0.168                   | (0.020)        | $1.3 \times 10^{-16}$                   | -0.044              | (0.027)        | 0.10                                    | -0.047              | (0.027)        | 0.080                                   | -0.145              | (0.028)        | $2.8 \times 10^{-7}$                    | 0.153               | (0.073)        | 0.036                                  | 0.148               | (0.073) | 0.043                |
| DRB1*03:01        | -0.172                  | (0.023)        | $5.1 \times 10^{-14}$                   | -0.077              | (0.024)        | $1.2 \times 10^{-3}$                    | -0.058              | (0.024)        | 0.015                                   | -0.055              | (0.024)        | 0.020                                   | -0.055              | (0.024)        | 0.019                                  | -0.037              | (0.024) | 0.12                 |
| DQB1*02:01        | -0.170                  | (0.023)        | $9.8 \times 10^{-14}$                   | -0.078              | (0.024)        | $9.3 \times 10^{-4}$                    | -0.059              | (0.024)        | 0.012                                   | -0.057              | (0.023)        | 0.016                                   | -0.057              | (0.023)        | 0.014                                  | -0.039              | (0.024) | 0.097                |
| DRB3*01:01        | -0.154                  | (0.022)        | $1.3 \times 10^{-12}$                   | -0.054              | (0.023)        | 0.018                                   | -0.033              | (0.023)        | 0.15                                    | -0.031              | (0.023)        | 0.17                                    | -0.031              | (0.023)        | 0.17                                   | -0.014              | (0.023) | 0.52                 |
| DQA1*04:01        | 0.402                   | (0.057)        | $1.9 \times 10^{-12}$                   | 0.506               | (0.057)        | $4.2 \times 10^{-19}$                   | 0.114               | (0.232)        | 0.62                                    | 0.107               | (0.231)        | 0.64                                    | 0.064               | (0.230)        | 0.78                                   | 0.073               | (0.230) | 0.75                 |
| DRB1*08:01        | 0.409                   | (0.059)        | $3.9 \times 10^{-12}$                   | 0.519               | (0.058)        | $7.2 \times 10^{-19}$                   | 0.118               | (0.204)        | 0.56                                    | 0.125               | (0.203)        | 0.54                                    | 0.093               | (0.203)        | 0.65                                   | 0.088               | (0.202) | 0.66                 |
| B*08:01           | -0.157                  | (0.023)        | $2.1 \times 10^{-11}$                   | -0.080              | (0.024)        | $7.3 \times 10^{-4}$                    | -0.062              | (0.024)        | $9.2 \times 10^{-3}$                    | -0.062              | (0.024)        | $9.0 \times 10^{-3}$                    | -0.062              | (0.024)        | $8.8 \times 10^{-3}$                   | -0.040              | (0.024) | 0.093                |
| C*07:01           | -0.135                  | (0.021)        | $2.6 \times 10^{-10}$                   | -0.072              | (0.022)        | $8.0 \times 10^{-4}$                    | -0.057              | (0.022)        | $7.9 \times 10^{-3}$                    | -0.055              | (0.021)        | $9.9 \times 10^{-3}$                    | -0.053              | (0.021)        | 0.013                                  | -0.034              | (0.022) | 0.12                 |
| B*44:03           | 0.215                   | (0.034)        | $4.4 \times 10^{-10}$                   | 0.101               | (0.035)        | $3.8 \times 10^{-3}$                    | 0.102               | (0.035)        | $3.5 \times 10^{-3}$                    | 0.140               | (0.035)        | $6.1 \times 10^{-5}$                    | 0.076               | (0.037)        | 0.039                                  | 0.089               | (0.037) | 0.016                |
| DPB1*06:01        | 0.550                   | (0.091)        | $1.7 \times 10^{-9}$                    | 0.386               | (0.091)        | $2.1 \times 10^{-5}$                    | 0.379               | (0.090)        | $2.7 \times 10^{-5}$                    | 0.019               | (0.101)        | 0.85                                    | 0.027               | (0.101)        | 0.79                                   | 0.028               | (0.101) | 0.78                 |
| DRB3*02:02        | -0.142                  | (0.024)        | $4.3 \times 10^{-9}$                    | -0.055              | (0.025)        | 0.026                                   | -0.034              | (0.025)        | 0.17                                    | -0.031              | (0.025)        | 0.21                                    | -0.029              | (0.025)        | 0.24                                   | -0.020              | (0.025) | 0.41                 |
| DQA1*01:02        | -0.116                  | (0.021)        | $2.2 \times 10^{-8}$                    | -0.015              | (0.022)        | 0.48                                    | 0.008               | (0.022)        | 0.72                                    | 0.011               | (0.022)        | 0.60                                    | 0.014               | (0.022)        | 0.52                                   | -0.002              | (0.022) | 0.92                 |
| C*16:01           | 0.219                   | (0.040)        | $3.0 \times 10^{-8}$                    | 0.111               | (0.040)        | $5.4 \times 10^{-3}$                    | 0.109               | (0.040)        | $6.1 \times 10^{-3}$                    | 0.142               | (0.040)        | $3.5 \times 10^{-4}$                    | 0.082               | (0.041)        | 0.045                                  | 0.092               | (0.041) | 0.024                |

|            |        |         |                      |        |         |                      |        |          |                      |        |         |                      |        |         |                      |        |         |                      |
|------------|--------|---------|----------------------|--------|---------|----------------------|--------|----------|----------------------|--------|---------|----------------------|--------|---------|----------------------|--------|---------|----------------------|
| A*29:02    | 0.209  | (0.042) | $6.6 \times 10^{-7}$ | 0.130  | (0.042) | $1.9 \times 10^{-3}$ | 0.127  | (0.042)  | $2.4 \times 10^{-3}$ | 0.151  | (0.042) | $2.9 \times 10^{-4}$ | 0.109  | (0.042) | $9.5 \times 10^{-3}$ | 0.126  | (0.042) | $2.8 \times 10^{-3}$ |
| DRB3*03:01 | -0.181 | (0.042) | $1.5 \times 10^{-5}$ | -0.092 | (0.042) | 0.028                | -0.073 | (0.042)  | 0.079                | -0.069 | (0.041) | 0.097                | -0.066 | (0.041) | 0.11                 | -0.069 | (0.041) | 0.096                |
| DRB1*13:02 | -0.178 | (0.042) | $2.0 \times 10^{-5}$ | -0.090 | (0.042) | 0.032                | -0.070 | (0.042)  | 0.091                | -0.066 | (0.041) | 0.11                 | -0.063 | (0.041) | 0.13                 | -0.065 | (0.041) | 0.11                 |
| B*40:01    | 0.150  | (0.036) | $3.7 \times 10^{-5}$ | 0.109  | (0.036) | $2.5 \times 10^{-3}$ | 0.092  | (0.036)  | 0.010                | 0.011  | (0.037) | 0.77                 | 0.024  | (0.037) | 0.52                 | 0.031  | (0.037) | 0.39                 |
| DPA1*01:03 | 0.086  | (0.021) | $6.4 \times 10^{-5}$ | 0.094  | (0.021) | $8.6 \times 10^{-6}$ | 0.090  | (0.021)  | $1.8 \times 10^{-5}$ | 0.079  | (0.021) | $1.6 \times 10^{-4}$ | 0.109  | (0.021) | $3.0 \times 10^{-7}$ | 0.107  | (0.021) | $5.3 \times 10^{-7}$ |
| B*14:02    | -0.205 | (0.051) | $6.5 \times 10^{-5}$ | -0.140 | (0.051) | $5.9 \times 10^{-3}$ | -0.126 | (0.050)  | 0.013                | -0.120 | (0.050) | 0.017                | -0.119 | (0.050) | 0.018                | -0.143 | (0.050) | $4.2 \times 10^{-3}$ |
| DPB1*11:01 | 0.202  | (0.051) | $7.3 \times 10^{-5}$ | 0.082  | (0.051) | 0.11                 | 0.075  | (0.051)  | 0.14                 | 0.101  | (0.051) | 0.047                | 0.027  | (0.052) | 0.60                 | 0.027  | (0.052) | 0.61                 |
| DRB5*99:01 | 0.088  | (0.023) | $1.1 \times 10^{-4}$ | -0.013 | (0.024) | 0.58                 | -0.035 | (0.024)  | 0.14                 | -0.037 | (0.023) | 0.11                 | -0.038 | (0.023) | 0.10                 | -0.021 | (0.024) | 0.38                 |
| DPA1*02:01 | -0.090 | (0.023) | $1.1 \times 10^{-4}$ | -0.098 | (0.023) | $2.2 \times 10^{-5}$ | -0.094 | (0.023)  | $3.7 \times 10^{-5}$ | -0.083 | (0.023) | $2.6 \times 10^{-4}$ | -0.113 | (0.023) | $1.0 \times 10^{-6}$ | -0.111 | (0.023) | $1.4 \times 10^{-6}$ |
| DQB1*06:02 | -0.090 | (0.024) | $1.4 \times 10^{-4}$ | 0.011  | (0.024) | 0.64                 | 0.032  | (0.024)  | 0.19                 | 0.034  | (0.024) | 0.15                 | 0.036  | (0.024) | 0.14                 | 0.016  | (0.024) | 0.50                 |
| DQA1*01:01 | -0.090 | (0.024) | $1.5 \times 10^{-4}$ | 0.005  | (0.025) | 0.84                 | 0.024  | (0.024)  | 0.32                 | 0.026  | (0.024) | 0.29                 | 0.026  | (0.024) | 0.28                 | 0.020  | (0.024) | 0.40                 |
| DRB5*01:01 | -0.086 | (0.023) | $2.1 \times 10^{-4}$ | 0.015  | (0.024) | 0.53                 | 0.036  | (0.0240) | 0.13                 | 0.038  | (0.024) | 0.11                 | 0.039  | (0.024) | 0.099                | 0.020  | (0.024) | 0.40                 |
| A*31:01    | 0.186  | (0.050) | $2.3 \times 10^{-4}$ | 0.116  | (0.050) | 0.020                | 0.117  | (0.050)  | 0.018                | 0.038  | (0.050) | 0.45                 | 0.049  | (0.050) | 0.33                 | 0.070  | (0.050) | 0.16                 |
| C*03:04    | 0.112  | (0.031) | $2.5 \times 10^{-4}$ | 0.051  | (0.030) | 0.091                | 0.043  | (0.030)  | 0.15                 | -0.010 | (0.031) | 0.76                 | 0.018  | (0.031) | 0.56                 | 0.023  | (0.031) | 0.46                 |



**Supplementary Table 11:** Associations from conditional analyses of classical HLA alleles associated with EBV EBNA antigen response at the Bonferroni-corrected threshold of  $P < 5 \times 10^{-4}$ . Independent alleles identified at each round are in bold.

| Allele            | Unconditional (Round 0) |                |                                         | Conditional Round 1 |                |                                         | Conditional Round 2 |                |                                         | Conditional Round 3 |                |                                         | Conditional Round 4 |                |                                         | Conditional Round 5 |         |                      |   |
|-------------------|-------------------------|----------------|-----------------------------------------|---------------------|----------------|-----------------------------------------|---------------------|----------------|-----------------------------------------|---------------------|----------------|-----------------------------------------|---------------------|----------------|-----------------------------------------|---------------------|---------|----------------------|---|
|                   | Beta                    | SE             | P                                       | Beta                | SE             | $P_{\text{cond}}$                       | Beta                | SE      | $P_{\text{cond}}$    |   |
| <b>DRB5*99:01</b> | <b>-0.255</b>           | <b>(0.022)</b> | <b><math>8.7 \times 10^{-30}</math></b> | -                   | -              | -                                       | -                   | -              | -                                       | -                   | -              | -                                       | -                   | -              | -                                       | -                   | -       | -                    | - |
| <b>DRB3*02:02</b> | 0.224                   | (0.024)        | $2.2 \times 10^{-20}$                   | <b>0.276</b>        | <b>(0.024)</b> | <b><math>6.8 \times 10^{-30}</math></b> | -                   | -              | -                                       | -                   | -              | -                                       | -                   | -              | -                                       | -                   | -       | -                    | - |
| <b>DQB1*02:01</b> | -0.217                  | (0.023)        | $2.4 \times 10^{-20}$                   | -0.174              | (0.024)        | $2.0 \times 10^{-13}$                   | <b>-0.164</b>       | <b>(0.023)</b> | <b><math>3.6 \times 10^{-12}</math></b> | -                   | -              | -                                       | -                   | -              | -                                       | -                   | -       | -                    | - |
| <b>DRB4*99:01</b> | 0.198                   | (0.018)        | $6.6 \times 10^{-29}$                   | 0.150               | (0.018)        | $3.8 \times 10^{-16}$                   | 0.092               | (0.019)        | $2.1 \times 10^{-6}$                    | <b>0.176</b>        | <b>(0.021)</b> | <b><math>8.3 \times 10^{-17}</math></b> | -                   | -              | -                                       | -                   | -       | -                    | - |
| <b>DPB1*03:01</b> | -0.215                  | (0.030)        | $5.7 \times 10^{-13}$                   | -0.199              | (0.030)        | $1.8 \times 10^{-11}$                   | -0.201              | (0.029)        | $6.9 \times 10^{-12}$                   | -0.206              | (0.029)        | $1.7 \times 10^{-12}$                   | <b>-0.220</b>       | <b>(0.029)</b> | <b><math>4.7 \times 10^{-14}</math></b> | -                   | -       | -                    | - |
| DRB1*15:01        | 0.253                   | (0.023)        | $7.8 \times 10^{-28}$                   | 0.025               | (0.079)        | 0.75                                    | 0.052               | (0.079)        | 0.51                                    | 0.048               | (0.078)        | 0.54                                    | 0.027               | (0.078)        | 0.73                                    | 0.025               | (0.078) | 0.75                 |   |
| DQA1*01:02        | 0.221                   | (0.020)        | $4.1 \times 10^{-27}$                   | 0.085               | (0.039)        | 0.027                                   | 0.138               | (0.038)        | $3.3 \times 10^{-4}$                    | 0.110               | (0.039)        | $4.5 \times 10^{-3}$                    | 0.018               | (0.040)        | 0.65                                    | 0.046               | (0.040) | 0.26                 |   |
| DRB5*01:01        | 0.248                   | (0.023)        | $5.2 \times 10^{-27}$                   | -0.049              | (0.085)        | 0.57                                    | -0.016              | (0.085)        | 0.85                                    | -0.016              | (0.084)        | 0.85                                    | -0.036              | (0.084)        | 0.66                                    | -0.036              | (0.084) | 0.67                 |   |
| DQB1*06:02        | 0.244                   | (0.023)        | $8.5 \times 10^{-26}$                   | -0.024              | (0.067)        | 0.72                                    | 0.006               | (0.066)        | 0.92                                    | 0.001               | (0.066)        | 0.99                                    | -0.028              | (0.066)        | 0.67                                    | -0.037              | (0.065) | 0.57                 |   |
| DQA1*02:01        | -0.231                  | (0.024)        | $3.1 \times 10^{-21}$                   | -0.188              | (0.025)        | $1.9 \times 10^{-14}$                   | -0.142              | (0.025)        | $9.1 \times 10^{-9}$                    | -0.190              | (0.025)        | $6.3 \times 10^{-14}$                   | -0.113              | (0.029)        | $9.2 \times 10^{-5}$                    | -0.117              | (0.029) | $4.9 \times 10^{-5}$ |   |
| DRB1*07:01        | -0.230                  | (0.024)        | $3.8 \times 10^{-21}$                   | -0.188              | (0.024)        | $1.9 \times 10^{-14}$                   | -0.142              | (0.025)        | $9.8 \times 10^{-9}$                    | -0.189              | (0.025)        | $6.4 \times 10^{-14}$                   | -0.113              | (0.029)        | $9.1 \times 10^{-5}$                    | -0.117              | (0.029) | $4.7 \times 10^{-5}$ |   |
| DRB1*03:01        | -0.211                  | (0.023)        | $3.4 \times 10^{-19}$                   | -0.168              | (0.024)        | $1.4 \times 10^{-12}$                   | -0.157              | (0.024)        | $2.8 \times 10^{-11}$                   | 0.119               | (0.127)        | 0.35                                    | 0.003               | (0.127)        | 0.98                                    | -0.005              | (0.126) | 0.97                 |   |
| DRB4*01:03        | -0.171                  | (0.020)        | $5.0 \times 10^{-18}$                   | -0.123              | (0.020)        | $1.4 \times 10^{-9}$                    | -0.067              | (0.021)        | $1.3 \times 10^{-3}$                    | -0.125              | (0.022)        | $1.0 \times 10^{-8}$                    | 0.029               | (0.033)        | 0.38                                    | 0.035               | (0.033) | 0.29                 |   |
| DRB1*12:01        | 0.578                   | (0.071)        | $3.5 \times 10^{-16}$                   | 0.617               | (0.070)        | $1.6 \times 10^{-18}$                   | 0.422               | (0.073)        | $7.1 \times 10^{-9}$                    | 0.393               | (0.073)        | $6.9 \times 10^{-8}$                    | 0.365               | (0.072)        | $4.8 \times 10^{-7}$                    | 0.360               | (0.072) | $6.4 \times 10^{-7}$ |   |
| DQB1*02:02        | -0.242                  | (0.031)        | $1.5 \times 10^{-14}$                   | -0.194              | (0.032)        | $7.5 \times 10^{-10}$                   | -0.144              | (0.032)        | $5.1 \times 10^{-6}$                    | -0.196              | (0.032)        | $1.1 \times 10^{-9}$                    | -0.105              | (0.035)        | $2.6 \times 10^{-3}$                    | -0.106              | (0.035) | $2.4 \times 10^{-3}$ |   |
| B*07:02           | 0.162                   | (0.023)        | $5.4 \times 10^{-12}$                   | 0.038               | (0.027)        | 0.16                                    | 0.038               | (0.027)        | 0.16                                    | 0.027               | (0.027)        | 0.31                                    | 0.020               | (0.027)        | 0.46                                    | 0.023               | (0.026) | 0.38                 |   |
| C*07:02           | 0.144                   | (0.023)        | $2.1 \times 10^{-10}$                   | 0.030               | (0.026)        | 0.24                                    | 0.031               | (0.025)        | 0.23                                    | 0.020               | (0.025)        | 0.43                                    | 0.007               | (0.025)        | 0.77                                    | 0.012               | (0.025) | 0.62                 |   |
| DPB1*04:02        | 0.165                   | (0.027)        | $1.3 \times 10^{-9}$                    | 0.187               | (0.027)        | $4.2 \times 10^{-12}$                   | 0.167               | (0.027)        | $4.4 \times 10^{-10}$                   | 0.159               | (0.027)        | $2.7 \times 10^{-9}$                    | 0.140               | (0.027)        | $1.7 \times 10^{-7}$                    | 0.116               | (0.027) | $1.6 \times 10^{-5}$ |   |
| DRB1*11:01        | 0.264                   | (0.046)        | $8.1 \times 10^{-9}$                    | 0.312               | (0.045)        | $6.9 \times 10^{-12}$                   | 0.082               | (0.052)        | 0.11                                    | 0.051               | (0.052)        | 0.32                                    | 0.034               | (0.051)        | 0.51                                    | 0.024               | (0.051) | 0.64                 |   |
| B*08:01           | -0.136                  | (0.024)        | $1.5 \times 10^{-8}$                    | -0.105              | (0.024)        | $1.1 \times 10^{-5}$                    | -0.066              | (0.024)        | $6.3 \times 10^{-3}$                    | 0.112               | (0.034)        | $1.1 \times 10^{-3}$                    | 0.082               | (0.034)        | 0.017                                   | 0.076               | (0.034) | 0.027                |   |
| DQA1*03:01        | -0.117                  | (0.021)        | $4.5 \times 10^{-8}$                    | -0.067              | (0.022)        | $1.9 \times 10^{-3}$                    | -0.010              | (0.022)        | 0.65                                    | -0.054              | (0.023)        | 0.018                                   | 0.084               | (0.028)        | $2.6 \times 10^{-3}$                    | 0.085               | (0.028) | $2.3 \times 10^{-3}$ |   |
| A*03:01           | 0.130                   | (0.024)        | $4.6 \times 10^{-8}$                    | 0.092               | (0.024)        | $1.1 \times 10^{-4}$                    | 0.100               | (0.024)        | $2.5 \times 10^{-5}$                    | 0.085               | (0.024)        | $3.1 \times 10^{-4}$                    | 0.073               | (0.024)        | $2.1 \times 10^{-3}$                    | 0.075               | (0.023) | $1.4 \times 10^{-3}$ |   |
| DRB4*01:01        | -0.168                  | (0.032)        | $9.4 \times 10^{-8}$                    | -0.126              | (0.032)        | $6.9 \times 10^{-5}$                    | -0.078              | (0.032)        | 0.014                                   | -0.117              | (0.032)        | $2.4 \times 10^{-4}$                    | -0.025              | (0.034)        | 0.46                                    | -0.032              | (0.034) | 0.35                 |   |
| DRB1*14:01        | 0.291                   | (0.060)        | $1.2 \times 10^{-6}$                    | 0.315               | (0.059)        | $1.2 \times 10^{-7}$                    | 0.120               | (0.062)        | 0.053                                   | 0.097               | (0.062)        | 0.118                                   | 0.075               | (0.062)        | 0.22                                    | 0.090               | (0.061) | 0.14                 |   |
| DRB3*01:01        | -0.107                  | (0.022)        | $1.3 \times 10^{-6}$                    | -0.060              | (0.022)        | $7.1 \times 10^{-3}$                    | -0.003              | (0.023)        | 0.90                                    | 0.279               | (0.035)        | $1.5 \times 10^{-15}$                   | 0.197               | (0.038)        | $1.6 \times 10^{-7}$                    | 0.187               | (0.037) | $5.8 \times 10^{-7}$ |   |
| DQB1*06:03        | 0.167                   | (0.036)        | $4.3 \times 10^{-6}$                    | 0.207               | (0.036)        | $9.0 \times 10^{-9}$                    | 0.140               | (0.036)        | $1.1 \times 10^{-4}$                    | 0.112               | (0.036)        | $2.1 \times 10^{-3}$                    | 0.047               | (0.037)        | 0.21                                    | 0.048               | (0.037) | 0.19                 |   |

|            |        |         |                      |        |         |                       |        |         |                      |        |         |                       |        |         |                      |        |         |                      |
|------------|--------|---------|----------------------|--------|---------|-----------------------|--------|---------|----------------------|--------|---------|-----------------------|--------|---------|----------------------|--------|---------|----------------------|
| DRB1*04:01 | -0.122 | (0.027) | $9.3 \times 10^{-6}$ | -0.074 | (0.028) | $7.4 \times 10^{-3}$  | -0.022 | (0.028) | 0.44                 | -0.061 | (0.028) | 0.031                 | 0.045  | (0.031) | 0.15                 | 0.035  | (0.031) | 0.26                 |
| DQB1*05:03 | 0.243  | (0.055) | $1.1 \times 10^{-5}$ | 0.266  | (0.055) | $1.3 \times 10^{-6}$  | 0.078  | (0.057) | 0.17                 | 0.053  | (0.057) | 0.35                  | 0.034  | (0.057) | 0.55                 | 0.047  | (0.057) | 0.41                 |
| C*07:01    | -0.094 | (0.022) | $1.7 \times 10^{-5}$ | -0.065 | (0.022) | $3.0 \times 10^{-3}$  | -0.039 | (0.022) | 0.07                 | 0.086  | (0.027) | $1.7 \times 10^{-3}$  | 0.066  | (0.027) | 0.015                | 0.064  | (0.027) | 0.020                |
| DPB1*05:01 | 0.243  | (0.058) | $2.9 \times 10^{-5}$ | 0.226  | (0.057) | $8.6 \times 10^{-5}$  | 0.219  | (0.057) | $1.2 \times 10^{-4}$ | 0.201  | (0.057) | $4.2 \times 10^{-4}$  | 0.169  | (0.057) | $2.8 \times 10^{-3}$ | 0.148  | (0.057) | $8.8 \times 10^{-3}$ |
| DRB1*13:01 | 0.150  | (0.037) | $4.3 \times 10^{-5}$ | 0.198  | (0.036) | $5.6 \times 10^{-8}$  | 0.133  | (0.037) | $3.0 \times 10^{-4}$ | 0.104  | (0.037) | $4.7 \times 10^{-3}$  | 0.037  | (0.038) | 0.33                 | 0.038  | (0.038) | 0.31                 |
| B*51:01    | 0.183  | (0.045) | $4.6 \times 10^{-5}$ | 0.194  | (0.044) | $1.2 \times 10^{-5}$  | 0.164  | (0.044) | $2.0 \times 10^{-4}$ | 0.144  | (0.044) | $1.1 \times 10^{-3}$  | 0.135  | (0.044) | $2.1 \times 10^{-3}$ | 0.144  | (0.044) | $1.0 \times 10^{-3}$ |
| B*57:01    | -0.165 | (0.044) | $1.7 \times 10^{-4}$ | -0.133 | (0.044) | $2.3 \times 10^{-3}$  | -0.110 | (0.043) | 0.011                | -0.132 | (0.043) | $2.4 \times 10^{-3}$  | -0.081 | (0.044) | 0.064                | -0.085 | (0.043) | 0.050                |
| DRB1*11:04 | 0.261  | (0.074) | $4.2 \times 10^{-4}$ | 0.311  | (0.073) | $2.3 \times 10^{-5}$  | 0.068  | (0.076) | 0.37                 | 0.046  | (0.076) | 0.55                  | 0.025  | (0.076) | 0.74                 | 0.003  | (0.075) | 0.96                 |
| DRB3*99:01 | -0.061 | (0.018) | $4.8 \times 10^{-4}$ | -0.135 | (0.018) | $1.3 \times 10^{-13}$ | -0.037 | (0.021) | 0.08                 | -0.230 | (0.028) | $1.2 \times 10^{-16}$ | -0.151 | (0.032) | $2.8 \times 10^{-6}$ | -0.158 | (0.032) | $8.9 \times 10^{-7}$ |

**Supplementary Table 12:** Associations from conditional analyses of classical HLA alleles associated with EBV p18 antigen response at the Bonferroni-corrected threshold of  $P < 5 \times 10^{-4}$ . Independent alleles identified at each round are in bold.

| Allele            | Unconditional (Round 0) |                |                                         | Conditional Round 1 |                |                                         | Conditional Round 2 |         |                      |
|-------------------|-------------------------|----------------|-----------------------------------------|---------------------|----------------|-----------------------------------------|---------------------|---------|----------------------|
|                   | Beta                    | (SE)           | P                                       | Beta                | (SE)           | $P_{\text{cond}}$                       | Beta                | (SE)    | $P_{\text{cond}}$    |
| <b>DRB5*99:01</b> | <b>-0.210</b>           | <b>(0.021)</b> | <b><math>1.7 \times 10^{-22}</math></b> | -                   | -              | -                                       | -                   | -       | -                    |
| <b>DRB1*04:04</b> | 0.319                   | (0.041)        | $4.7 \times 10^{-15}$                   | <b>0.357</b>        | <b>(0.040)</b> | <b><math>1.3 \times 10^{-18}</math></b> | -                   | -       | -                    |
| DRB5*01:01        | 0.211                   | (0.022)        | $1.4 \times 10^{-21}$                   | 0.041               | (0.083)        | 0.62                                    | 0.042               | (0.082) | 0.61                 |
| DRB1*15:01        | 0.209                   | (0.022)        | $4.2 \times 10^{-21}$                   | 0.022               | (0.077)        | 0.78                                    | 0.026               | (0.077) | 0.73                 |
| DQA1*01:02        | 0.181                   | (0.020)        | $2.7 \times 10^{-20}$                   | 0.067               | (0.037)        | 0.069                                   | 0.085               | (0.037) | 0.020                |
| C*07:02           | 0.196                   | (0.022)        | $9.7 \times 10^{-20}$                   | 0.125               | (0.024)        | $2.9 \times 10^{-7}$                    | 0.117               | (0.024) | $1.4 \times 10^{-6}$ |
| DQB1*06:02        | 0.199                   | (0.022)        | $4.7 \times 10^{-19}$                   | -0.043              | (0.064)        | 0.50                                    | -0.039              | (0.064) | 0.54                 |
| B*07:02           | 0.195                   | (0.022)        | $2.2 \times 10^{-18}$                   | 0.115               | (0.026)        | $8.1 \times 10^{-6}$                    | 0.106               | (0.026) | $3.3 \times 10^{-5}$ |
| B*08:01           | -0.119                  | (0.022)        | $8.3 \times 10^{-8}$                    | -0.094              | (0.022)        | $2.4 \times 10^{-5}$                    | -0.079              | (0.022) | $3.6 \times 10^{-4}$ |
| DPB1*03:01        | -0.143                  | (0.028)        | $2.1 \times 10^{-7}$                    | -0.129              | (0.027)        | $2.9 \times 10^{-6}$                    | -0.126              | (0.027) | $4.0 \times 10^{-6}$ |
| DQB1*02:01        | -0.105                  | (0.022)        | $1.3 \times 10^{-6}$                    | -0.069              | (0.022)        | $1.7 \times 10^{-3}$                    | -0.047              | (0.022) | 0.031                |
| DRB1*03:01        | -0.102                  | (0.022)        | $2.2 \times 10^{-6}$                    | -0.067              | (0.022)        | $2.2 \times 10^{-3}$                    | -0.045              | (0.022) | 0.040                |
| DPB1*04:01        | 0.076                   | (0.016)        | $2.5 \times 10^{-6}$                    | 0.046               | (0.016)        | $5.0 \times 10^{-3}$                    | 0.052               | (0.016) | $1.5 \times 10^{-3}$ |
| C*07:01           | -0.093                  | (0.020)        | $4.0 \times 10^{-6}$                    | -0.070              | (0.020)        | $5.8 \times 10^{-4}$                    | -0.056              | (0.020) | $5.7 \times 10^{-3}$ |
| DRB3*99:01        | 0.075                   | (0.016)        | $5.5 \times 10^{-6}$                    | 0.031               | (0.017)        | 0.074                                   | 0.001               | (0.017) | 0.95                 |
| DQA1*05:01        | -0.084                  | (0.019)        | $6.0 \times 10^{-6}$                    | -0.045              | (0.019)        | 0.017                                   | -0.020              | (0.019) | 0.29                 |
| B*14:02           | -0.212                  | (0.048)        | $8.8 \times 10^{-6}$                    | -0.199              | (0.047)        | $2.7 \times 10^{-5}$                    | -0.183              | (0.047) | $1.1 \times 10^{-4}$ |
| C*08:02           | -0.181                  | (0.041)        | $9.2 \times 10^{-6}$                    | -0.165              | (0.041)        | $4.8 \times 10^{-5}$                    | -0.149              | (0.040) | $2.2 \times 10^{-4}$ |
| DPB1*06:01        | 0.379                   | (0.089)        | $2.0 \times 10^{-5}$                    | 0.424               | (0.088)        | $1.7 \times 10^{-6}$                    | 0.077               | (0.100) | 0.44                 |
| DQA1*02:01        | -0.096                  | (0.023)        | $2.5 \times 10^{-5}$                    | -0.059              | (0.023)        | 0.010                                   | -0.038              | (0.023) | 0.099                |
| DRB1*07:01        | -0.095                  | (0.023)        | $3.1 \times 10^{-5}$                    | -0.058              | (0.023)        | 0.011                                   | -0.037              | (0.023) | 0.11                 |
| C*04:01           | -0.117                  | (0.028)        | $4.1 \times 10^{-5}$                    | -0.093              | (0.028)        | $1.1 \times 10^{-3}$                    | -0.081              | (0.028) | $4.0 \times 10^{-3}$ |
| C*03:03           | -0.139                  | (0.034)        | $4.2 \times 10^{-5}$                    | -0.130              | (0.034)        | $1.1 \times 10^{-4}$                    | -0.142              | (0.034) | $2.2 \times 10^{-5}$ |
| DRB3*01:01        | -0.083                  | (0.021)        | $4.9 \times 10^{-5}$                    | -0.046              | (0.021)        | 0.026                                   | -0.025              | (0.021) | 0.23                 |
| DPA1*02:01        | -0.090                  | (0.022)        | $5.4 \times 10^{-5}$                    | -0.066              | (0.022)        | $3.2 \times 10^{-3}$                    | -0.054              | (0.022) | 0.015                |
| DQB1*02:02        | -0.112                  | (0.029)        | $1.5 \times 10^{-4}$                    | -0.072              | (0.030)        | 0.015                                   | -0.047              | (0.030) | 0.11                 |
| DPB1*01:01        | -0.124                  | (0.034)        | $2.3 \times 10^{-4}$                    | -0.097              | (0.033)        | $3.8 \times 10^{-3}$                    | -0.084              | (0.033) | 0.012                |
| B*35:01           | -0.139                  | (0.038)        | $2.5 \times 10^{-4}$                    | -0.109              | (0.038)        | $4.1 \times 10^{-3}$                    | -0.097              | (0.038) | 0.010                |
| B*51:01           | 0.153                   | (0.042)        | $3.0 \times 10^{-4}$                    | 0.164               | (0.042)        | $1.0 \times 10^{-4}$                    | 0.152               | (0.042) | $3.0 \times 10^{-4}$ |
| B*15:01           | -0.116                  | (0.033)        | $4.1 \times 10^{-4}$                    | -0.102              | (0.033)        | $1.8 \times 10^{-3}$                    | -0.108              | (0.032) | $8.4 \times 10^{-4}$ |

**Supplementary Table 13:** Associations from conditional analyses of classical HLA alleles associated with antigen response at the Bonferroni-corrected threshold of  $P < 5 \times 10^{-4}$ . Independent alleles identified at each round are in bold. Results are presented for antigens with a single conditionally independent classical allele.

| Antigen  | Allele            | Unconditional (Round 0) |                      |                                         | Conditional Round 1 |                      |                      |
|----------|-------------------|-------------------------|----------------------|-----------------------------------------|---------------------|----------------------|----------------------|
|          |                   | Beta                    | (SE)                 | P                                       | Beta                | SE                   | $P_{\text{cond}}$    |
| CMV pp52 | <b>DRB1*01:03</b> | <b>-0.538</b>           | <b>(0.075)</b>       | <b><math>9.4 \times 10^{-13}</math></b> | -                   | -                    | -                    |
|          | C*07:01           | -0.091                  | (0.025)              | $2.7 \times 10^{-4}$                    | -0.099              | (0.025)              | $6.4 \times 10^{-5}$ |
|          | DPB1*03:01        | 0.121                   | (0.034)              | $3.7 \times 10^{-4}$                    | 0.112               | (0.034)              | $8.9 \times 10^{-4}$ |
| EBV EA-D | <b>DQB1*02:01</b> | <b>-0.154</b>           | <b>(0.024)</b>       | <b><math>8.4 \times 10^{-11}</math></b> | -                   | -                    | -                    |
|          | DRB1*03:01        | -0.147                  | (0.024)              | $5.5 \times 10^{-10}$                   | 0.109               | (0.124)              | 0.38                 |
|          | B*08:01           | -0.144                  | (0.024)              | $2.7 \times 10^{-9}$                    | -0.064              | (0.035)              | 0.068                |
|          | DRB1*09:01        | 0.407                   | (0.073)              | $3.2 \times 10^{-8}$                    | 0.383               | (0.073)              | $1.9 \times 10^{-7}$ |
|          | DQA1*03:01        | 0.110                   | (0.021)              | $1.1 \times 10^{-7}$                    | 0.085               | (0.021)              | $6.6 \times 10^{-5}$ |
|          | DRB4*99:01        | -0.088                  | (0.018)              | $5.8 \times 10^{-7}$                    | -0.058              | (0.018)              | $1.5 \times 10^{-3}$ |
|          | C*07:01           | -0.109                  | (0.022)              | $7.7 \times 10^{-7}$                    | -0.032              | (0.028)              | 0.25                 |
|          | DRB3*99:01        | 0.087                   | (0.018)              | $9.0 \times 10^{-7}$                    | 0.033               | (0.021)              | 0.12                 |
|          | A*03:01           | 0.114                   | (0.024)              | $2.4 \times 10^{-6}$                    | 0.098               | (0.024)              | $5.6 \times 10^{-5}$ |
|          | DRB4*01:03        | 0.085                   | (0.019)              | $1.1 \times 10^{-5}$                    | 0.057               | (0.020)              | $4.4 \times 10^{-3}$ |
|          | DQA1*05:01        | -0.088                  | (0.020)              | $1.4 \times 10^{-5}$                    | 0.026               | (0.031)              | 0.40                 |
|          | DQB1*03:03        | 0.164                   | (0.038)              | $1.4 \times 10^{-5}$                    | 0.142               | (0.038)              | $1.9 \times 10^{-4}$ |
|          | DRB3*01:01        | -0.096                  | (0.022)              | $2.0 \times 10^{-5}$                    | 0.035               | (0.034)              | 0.32                 |
|          | DQB1*03:01        | 0.094                   | (0.022)              | $2.1 \times 10^{-5}$                    | 0.069               | (0.023)              | $2.2 \times 10^{-3}$ |
|          | DPB1*02:01        | -0.103                  | (0.028)              | $1.9 \times 10^{-4}$                    | -0.110              | (0.028)              | $6.3 \times 10^{-5}$ |
| A*01:01  | -0.078            | (0.021)                 | $2.6 \times 10^{-4}$ | -0.021                                  | (0.024)             | 0.38                 |                      |
| A*02:01  | -0.068            | (0.019)                 | $3.7 \times 10^{-4}$ | -0.086                                  | (0.019)             | $7.8 \times 10^{-6}$ |                      |
| HHV7     | <b>DQB1*05:01</b> | <b>-0.139</b>           | <b>(0.025)</b>       | <b><math>2.8 \times 10^{-8}</math></b>  | -                   | -                    | -                    |
|          | DQA1*01:01        | -0.125                  | (0.023)              | $8.2 \times 10^{-8}$                    | -0.045              | (0.053)              | 0.40                 |
|          | DRB1*01:01        | -0.146                  | (0.028)              | $2.3 \times 10^{-7}$                    | -0.049              | (0.052)              | 0.35                 |
|          | DRB4*99:01        | -0.085                  | (0.017)              | $4.5 \times 10^{-7}$                    | -0.066              | (0.017)              | $1.6 \times 10^{-4}$ |
|          | DPB1*04:02        | -0.133                  | (0.026)              | $4.8 \times 10^{-7}$                    | -0.115              | (0.027)              | $1.5 \times 10^{-5}$ |
|          | DRB1*04:01        | 0.128                   | (0.026)              | $7.3 \times 10^{-7}$                    | 0.110               | (0.026)              | $2.3 \times 10^{-5}$ |
|          | DRB4*01:03        | 0.077                   | (0.019)              | $3.0 \times 10^{-5}$                    | 0.058               | (0.019)              | $2.0 \times 10^{-3}$ |
| HSV1     | <b>DQB1*02:01</b> | <b>0.145</b>            | <b>(0.026)</b>       | <b><math>2.1 \times 10^{-8}</math></b>  | -                   | -                    | -                    |
|          | DRB1*03:01        | 0.140                   | (0.026)              | $6.3 \times 10^{-8}$                    | -0.090              | (0.147)              | 0.54                 |
|          | DQA1*01:02        | -0.110                  | (0.024)              | $3.1 \times 10^{-6}$                    | -0.086              | (0.024)              | $3.7 \times 10^{-4}$ |
|          | DQB1*06:02        | -0.115                  | (0.027)              | $1.7 \times 10^{-5}$                    | -0.091              | (0.027)              | $7.9 \times 10^{-4}$ |
|          | DRB5*99:01        | 0.110                   | (0.026)              | $2.3 \times 10^{-5}$                    | 0.086               | (0.026)              | $1.2 \times 10^{-3}$ |
|          | DRB1*15:01        | -0.110                  | (0.027)              | $3.6 \times 10^{-5}$                    | -0.086              | (0.027)              | $1.5 \times 10^{-3}$ |
|          | DRB3*01:01        | 0.102                   | (0.025)              | $3.6 \times 10^{-5}$                    | -0.011              | (0.038)              | 0.78                 |
|          | DRB5*01:01        | -0.109                  | (0.026)              | $3.7 \times 10^{-5}$                    | -0.085              | (0.027)              | $1.5 \times 10^{-3}$ |

|     |                   |              |                |                                         |        |         |                      |
|-----|-------------------|--------------|----------------|-----------------------------------------|--------|---------|----------------------|
|     | B*08:01           | 0.106        | (0.026)        | $6.2 \times 10^{-5}$                    | -0.003 | (0.038) | 0.93                 |
| VZV | <b>DRB1*03:01</b> | <b>0.236</b> | <b>(0.022)</b> | <b><math>7.3 \times 10^{-26}</math></b> | -      | -       | -                    |
|     | DQB1*02:01        | 0.236        | (0.022)        | $7.5 \times 10^{-26}$                   | 0.117  | (0.126) | 0.35                 |
|     | B*08:01           | 0.238        | (0.023)        | $4.7 \times 10^{-25}$                   | 0.131  | (0.034) | $1.2 \times 10^{-4}$ |
|     | DRB3*01:01        | 0.197        | (0.021)        | $3.7 \times 10^{-20}$                   | 0.053  | (0.034) | 0.12                 |
|     | C*07:01           | 0.194        | (0.021)        | $4.6 \times 10^{-20}$                   | 0.088  | (0.027) | $1.4 \times 10^{-3}$ |
|     | A*01:01           | 0.181        | (0.021)        | $1.9 \times 10^{-18}$                   | 0.104  | (0.023) | $6.9 \times 10^{-6}$ |
|     | DQA1*05:01        | 0.153        | (0.019)        | $2.8 \times 10^{-15}$                   | -0.013 | (0.031) | 0.67                 |
|     | DRB3*99:01        | -0.114       | (0.017)        | $3.2 \times 10^{-11}$                   | -0.013 | (0.021) | 0.54                 |
|     | DRB5*99:01        | 0.136        | (0.023)        | $2.3 \times 10^{-9}$                    | 0.096  | (0.023) | $3.1 \times 10^{-5}$ |
|     | DRB5*01:01        | -0.135       | (0.023)        | $7.1 \times 10^{-9}$                    | -0.095 | (0.023) | $5.1 \times 10^{-5}$ |
|     | DQB1*06:02        | -0.133       | (0.023)        | $1.6 \times 10^{-8}$                    | -0.095 | (0.024) | $5.4 \times 10^{-5}$ |
|     | DRB1*15:01        | -0.132       | (0.023)        | $1.8 \times 10^{-8}$                    | -0.092 | (0.024) | $1.0 \times 10^{-4}$ |
|     | A*02:01           | -0.103       | (0.019)        | $4.1 \times 10^{-8}$                    | -0.079 | (0.019) | $3.0 \times 10^{-5}$ |
|     | DQA1*01:02        | -0.099       | (0.021)        | $1.4 \times 10^{-6}$                    | -0.057 | (0.021) | $6.7 \times 10^{-3}$ |
|     | DQB1*03:01        | -0.089       | (0.022)        | $4.9 \times 10^{-5}$                    | -0.046 | (0.022) | 0.040                |
|     | B*44:02           | -0.108       | (0.027)        | $5.8 \times 10^{-5}$                    | -0.074 | (0.027) | $5.7 \times 10^{-3}$ |
|     | <b>DRB5*99:01</b> | <b>0.305</b> | <b>(0.032)</b> | <b><math>1.2 \times 10^{-21}</math></b> | -      | -       | -                    |
| JCV | DRB5*01:01        | -0.309       | (0.033)        | $4.8 \times 10^{-21}$                   | -0.097 | (0.120) | 0.42                 |
|     | DQB1*06:02        | -0.310       | (0.033)        | $7.2 \times 10^{-21}$                   | -0.116 | (0.093) | 0.21                 |
|     | DRB1*15:01        | -0.309       | (0.033)        | $9.0 \times 10^{-21}$                   | -0.082 | (0.112) | 0.46                 |
|     | DQA1*01:02        | -0.218       | (0.028)        | $8.5 \times 10^{-15}$                   | 0.006  | (0.049) | 0.89                 |
|     | DQB1*03:01        | 0.133        | (0.027)        | $1.1 \times 10^{-6}$                    | 0.086  | (0.028) | $1.7 \times 10^{-3}$ |
|     | B*07:02           | -0.132       | (0.031)        | $2.8 \times 10^{-5}$                    | 0.012  | (0.035) | 0.73                 |
|     | DRB4*99:01        | -0.087       | (0.022)        | $5.1 \times 10^{-5}$                    | -0.033 | (0.022) | 0.14                 |
|     | DPB1*04:01        | -0.087       | (0.021)        | $5.6 \times 10^{-5}$                    | -0.051 | (0.022) | 0.017                |
|     | DRB4*01:03        | 0.093        | (0.024)        | $9.4 \times 10^{-5}$                    | 0.044  | (0.024) | 0.068                |
|     | C*07:02           | -0.115       | (0.030)        | $1.5 \times 10^{-4}$                    | 0.013  | (0.033) | 0.71                 |
|     | DRB3*99:01        | -0.082       | (0.022)        | $1.6 \times 10^{-4}$                    | -0.029 | (0.022) | 0.19                 |
|     | DQA1*03:01        | 0.096        | (0.026)        | $2.0 \times 10^{-4}$                    | 0.050  | (0.026) | 0.057                |
|     | DRB1*04:01        | 0.123        | (0.033)        | $2.1 \times 10^{-4}$                    | 0.079  | (0.033) | 0.018                |

**Supplementary Table 14:** Associations from conditional analyses of classical HLA alleles associated with MCV antigen response at the Bonferroni-corrected threshold of  $P < 5 \times 10^{-4}$ . Independent alleles identified at each round are in bold.

| Allele            | Unconditional (Round 0) |                |                                         | Conditional Round 1 |                |                                         | Conditional Round 2 |                |                                         | Conditional Round 3 |                |                                         | Conditional Round 4 |         |                      |
|-------------------|-------------------------|----------------|-----------------------------------------|---------------------|----------------|-----------------------------------------|---------------------|----------------|-----------------------------------------|---------------------|----------------|-----------------------------------------|---------------------|---------|----------------------|
|                   | Beta                    | (SE)           | P                                       | Beta                | (SE)           | $P_{\text{cond}}$                       | Beta                | (SE)           | $P_{\text{cond}}$                       | Beta                | (SE)           | $P_{\text{cond}}$                       | Beta                | (SE)    | $P_{\text{cond}}$    |
| <b>DQA1*01:01</b> | <b>0.215</b>            | <b>(0.027)</b> | <b><math>1.1 \times 10^{-15}</math></b> | -                   | -              | -                                       | -                   | -              | -                                       | -                   | -              | -                                       | -                   | -       | -                    |
| <b>DRB1*04:04</b> | -0.390                  | (0.054)        | $8.6 \times 10^{-13}$                   | <b>-0.362</b>       | <b>(0.054)</b> | <b><math>3.0 \times 10^{-11}</math></b> | -                   | -              | -                                       | -                   | -              | -                                       | -                   | -       | -                    |
| <b>A*29:02</b>    | -0.359                  | (0.052)        | $4.5 \times 10^{-12}$                   | -0.342              | (0.052)        | $3.7 \times 10^{-11}$                   | <b>-0.350</b>       | <b>(0.051)</b> | <b><math>1.0 \times 10^{-11}</math></b> | -                   | -              | -                                       | -                   | -       | -                    |
| <b>DRB1*15:01</b> | -0.213                  | (0.029)        | $2.1 \times 10^{-13}$                   | -0.178              | (0.029)        | $1.1 \times 10^{-9}$                    | -0.199              | (0.029)        | $1.0 \times 10^{-11}$                   | <b>-0.203</b>       | <b>(0.029)</b> | <b><math>3.7 \times 10^{-12}</math></b> | -                   | -       | -                    |
| DQB1*05:01        | 0.220                   | (0.029)        | $1.6 \times 10^{-14}$                   | 0.070               | (0.066)        | 0.29                                    | 0.070               | (0.066)        | 0.29                                    | 0.070               | (0.065)        | 0.29                                    | 0.066               | (0.065) | 0.31                 |
| DQB1*06:02        | -0.213                  | (0.029)        | $2.5 \times 10^{-13}$                   | -0.179              | (0.029)        | $1.2 \times 10^{-9}$                    | -0.199              | (0.029)        | $1.2 \times 10^{-11}$                   | -0.204              | (0.029)        | $3.7 \times 10^{-12}$                   | -0.103              | (0.124) | 0.41                 |
| DRB5*01:01        | -0.210                  | (0.029)        | $3.7 \times 10^{-13}$                   | -0.176              | (0.029)        | $1.8 \times 10^{-9}$                    | -0.196              | (0.029)        | $1.9 \times 10^{-11}$                   | -0.200              | (0.029)        | $7.2 \times 10^{-12}$                   | 0.067               | (0.227) | 0.77                 |
| DRB1*01:01        | 0.216                   | (0.032)        | $1.3 \times 10^{-11}$                   | 0.046               | (0.050)        | 0.35                                    | 0.044               | (0.050)        | 0.38                                    | 0.044               | (0.050)        | 0.37                                    | 0.041               | (0.049) | 0.41                 |
| DRB5*99:01        | 0.185                   | (0.028)        | $4.8 \times 10^{-11}$                   | 0.152               | (0.028)        | $7.4 \times 10^{-8}$                    | 0.173               | (0.028)        | $1.1 \times 10^{-9}$                    | 0.177               | (0.028)        | $3.8 \times 10^{-10}$                   | -0.094              | (0.089) | 0.29                 |
| DQA1*01:02        | -0.151                  | (0.025)        | $1.9 \times 10^{-9}$                    | -0.113              | (0.026)        | $9.8 \times 10^{-6}$                    | -0.136              | (0.026)        | $1.1 \times 10^{-7}$                    | -0.143              | (0.026)        | $2.5 \times 10^{-8}$                    | 0.004               | (0.044) | 0.93                 |
| DPB1*06:01        | -0.591                  | (0.122)        | $1.2 \times 10^{-6}$                    | -0.556              | (0.121)        | $4.4 \times 10^{-6}$                    | -0.228              | (0.137)        | 0.095                                   | -0.208              | (0.136)        | 0.13                                    | -0.217              | (0.136) | 0.11                 |
| DRB3*02:02        | 0.129                   | (0.028)        | $3.0 \times 10^{-6}$                    | 0.131               | (0.028)        | $1.9 \times 10^{-6}$                    | 0.118               | (0.027)        | $1.9 \times 10^{-5}$                    | 0.109               | (0.027)        | $6.8 \times 10^{-5}$                    | 0.081               | (0.028) | $3.4 \times 10^{-3}$ |
| DQB1*03:01        | 0.108                   | (0.025)        | $1.9 \times 10^{-5}$                    | 0.153               | (0.026)        | $2.1 \times 10^{-9}$                    | 0.139               | (0.026)        | $6.0 \times 10^{-8}$                    | 0.131               | (0.025)        | $2.7 \times 10^{-7}$                    | 0.096               | (0.026) | $2.3 \times 10^{-4}$ |
| C*07:02           | -0.118                  | (0.028)        | $2.7 \times 10^{-5}$                    | -0.116              | (0.028)        | $3.0 \times 10^{-5}$                    | -0.117              | (0.028)        | $2.5 \times 10^{-5}$                    | -0.128              | (0.028)        | $3.7 \times 10^{-6}$                    | -0.051              | (0.031) | 0.096                |
| B*07:02           | -0.121                  | (0.029)        | $3.4 \times 10^{-5}$                    | -0.116              | (0.029)        | $6.3 \times 10^{-5}$                    | -0.118              | (0.029)        | $4.4 \times 10^{-5}$                    | -0.127              | (0.029)        | $1.0 \times 10^{-5}$                    | -0.039              | (0.033) | 0.23                 |
| C*16:01           | -0.178                  | (0.048)        | $2.1 \times 10^{-4}$                    | -0.154              | (0.048)        | $1.3 \times 10^{-3}$                    | -0.164              | (0.048)        | $5.7 \times 10^{-4}$                    | 0.096               | (0.064)        | 0.13                                    | 0.073               | (0.064) | 0.25                 |
| DQB1*03:02        | -0.114                  | (0.033)        | $4.8 \times 10^{-4}$                    | -0.080              | (0.033)        | 0.015                                   | 0.064               | (0.040)        | 0.11                                    | 0.051               | (0.040)        | 0.20                                    | 0.024               | (0.040) | 0.55                 |

**Supplementary Table 15:** TWAS results for antigen response phenotypes that were analyzed using gene expression models based on whole blood and brain tissues. Associations with  $P_{TWAS} < 4.2 \times 10^{-6}$  are considered statistically significant and genes with  $P_{TWAS} < 4.5 \times 10^{-5}$  are considered suggestive.

| Antigen   | Region   | Gene ID         | Gene               | Whole Blood |                      | Brain (Frontal Cortex) |                       |
|-----------|----------|-----------------|--------------------|-------------|----------------------|------------------------|-----------------------|
|           |          |                 |                    | Z           | $P_{TWAS}$           | Z                      | $P_{TWAS}$            |
| BKV       | 19q13.33 | ENSG00000176909 | <i>MAMSTR</i>      | -4.22       | $2.4 \times 10^{-5}$ | -                      | -                     |
|           | 7q21.2   | ENSG00000004766 | <i>VPS50</i>       | 4.09        | $4.4 \times 10^{-5}$ | -0.33                  | 0.74                  |
|           | 19q13.33 | ENSG00000142233 | <i>NTN5</i>        | -2.33       | 0.020                | 6.09                   | $1.1 \times 10^{-9}$  |
|           | 19q13.33 | ENSG00000176920 | <i>FUT2</i>        | -           | -                    | 7.16                   | $8.1 \times 10^{-13}$ |
|           | 20q13.2  | ENSG00000054803 | <i>CBLN4</i>       | -           | -                    | 4.09                   | $4.4 \times 10^{-5}$  |
| CMV pp150 | 16p13.3  | ENSG00000172366 | <i>MCRIP2</i>      | -0.44       | 0.66                 | -4.10                  | $4.1 \times 10^{-5}$  |
| CMV pp52  | 3q13.12  | ENSG00000196776 | <i>CD47</i>        | -4.49       | $7.3 \times 10^{-6}$ | -                      | -                     |
| HHV6 IE1A | 6p21.32  | ENSG00000196735 | <i>HLA-DQA1</i>    | 4.29        | $1.8 \times 10^{-5}$ | 4.34                   | $1.4 \times 10^{-5}$  |
|           | 6p21.33  | ENSG00000204525 | <i>HLA-C</i>       | -2.97       | $3.0 \times 10^{-3}$ | -4.25                  | $2.1 \times 10^{-5}$  |
| HHV6 p101 | 4q13.3   | ENSG00000163734 | <i>CXCL3</i>       | 4.12        | $3.8 \times 10^{-5}$ | 4.12                   | $3.8 \times 10^{-5}$  |
| HHV7      | 6p21.32  | ENSG00000232629 | <i>HLA-DQB2</i>    | 5.38        | $7.3 \times 10^{-8}$ | 5.29                   | $1.2 \times 10^{-7}$  |
|           | 6p21.32  | ENSG00000179344 | <i>HLA-DQB1</i>    | -5.07       | $3.9 \times 10^{-7}$ | 0.64                   | 0.52                  |
|           | 22q13.2  | ENSG00000273424 | <i>CTA-223H9.9</i> | -4.71       | $2.5 \times 10^{-6}$ | -4.71                  | $2.5 \times 10^{-6}$  |
|           | 22q13.2  | ENSG00000167074 | <i>TEF</i>         | 4.66        | $3.1 \times 10^{-6}$ | -                      | -                     |
|           | 22q13.33 | ENSG00000025708 | <i>TYMP</i>        | 4.54        | $5.6 \times 10^{-6}$ | 3.98                   | $6.8 \times 10^{-5}$  |
|           | 6p21.32  | ENSG00000204267 | <i>TAP2</i>        | -4.48       | $7.4 \times 10^{-6}$ | 1.90                   | 0.058                 |
|           | 17q21.32 | ENSG00000198933 | <i>TBKBP1</i>      | -4.41       | $1.0 \times 10^{-5}$ | -4.21                  | $2.6 \times 10^{-5}$  |
|           | 22q13.33 | ENSG00000177989 | <i>ODF3B</i>       | 4.30        | $1.7 \times 10^{-5}$ | 3.01                   | $2.6 \times 10^{-3}$  |
|           | 22q13.2  | ENSG00000100417 | <i>PMM1</i>        | -4.26       | $2.0 \times 10^{-5}$ | -1.90                  | 0.057                 |
|           | 6p21.33  | ENSG00000204428 | <i>LY6G5C</i>      | 4.24        | $2.3 \times 10^{-5}$ | 4.24                   | $2.3 \times 10^{-5}$  |
| HSV1      | 22q13.2  | ENSG00000172346 | <i>CSDC2</i>       | 4.14        | $3.4 \times 10^{-5}$ | 4.67                   | $3.0 \times 10^{-6}$  |
|           | 1q31.2   | ENSG00000090104 | <i>RGS1</i>        | 2.70        | $6.9 \times 10^{-3}$ | -4.65                  | $3.3 \times 10^{-6}$  |
|           | 2q11.2   | ENSG00000198885 | <i>ITPRIPL1</i>    | -2.66       | $7.9 \times 10^{-3}$ | -4.09                  | $4.4 \times 10^{-5}$  |
|           | 6p21.32  | ENSG00000204261 | <i>PSMB8-AS1</i>   | 2.38        | 0.017                | -5.06                  | $4.1 \times 10^{-7}$  |
|           | 6p21.32  | ENSG00000241404 | <i>EGFL8</i>       | -0.83       | 0.41                 | -5.36                  | $8.4 \times 10^{-8}$  |
|           | 6p21.32  | ENSG00000179344 | <i>HLA-DQB1</i>    | -5.46       | $4.8 \times 10^{-8}$ | -4.62                  | $3.9 \times 10^{-6}$  |
|           | 6p21.32  | ENSG00000232629 | <i>HLA-DQB2</i>    | 5.11        | $3.3 \times 10^{-7}$ | 4.99                   | $5.9 \times 10^{-7}$  |
|           | 6p21.32  | ENSG00000204257 | <i>HLA-DMA</i>     | 4.93        | $8.2 \times 10^{-7}$ | 4.88                   | $1.0 \times 10^{-6}$  |
|           | 6p21.33  | ENSG00000204444 | <i>APOM</i>        | -4.71       | $2.5 \times 10^{-6}$ | -4.60                  | $4.3 \times 10^{-6}$  |
|           | 6p21.33  | ENSG00000204386 | <i>NEU1</i>        | -4.44       | $9.1 \times 10^{-6}$ | -                      | -                     |
| HSV1      | 6p21.33  | ENSG00000231852 | <i>CYP21A2</i>     | 4.41        | $1.0 \times 10^{-5}$ | -                      | -                     |
|           | 6p21.33  | ENSG00000224389 | <i>C4B</i>         | 4.40        | $1.1 \times 10^{-5}$ | -                      | -                     |
|           | 6p21.33  | ENSG00000166278 | <i>C2</i>          | 4.38        | $1.2 \times 10^{-5}$ | -                      | -                     |
|           | 6p21.33  | ENSG00000213719 | <i>CLIC1</i>       | -4.34       | $1.5 \times 10^{-5}$ | -4.34                  | $1.5 \times 10^{-5}$  |
|           | 6p21.32  | ENSG00000204305 | <i>AGER</i>        | 4.13        | $3.6 \times 10^{-5}$ | 2.96                   | $3.0 \times 10^{-3}$  |

|     |         |                 |                  |        |                       |        |                       |
|-----|---------|-----------------|------------------|--------|-----------------------|--------|-----------------------|
|     | 6p21.33 | ENSG00000244731 | <i>C4A</i>       | -4.09  | $4.3 \times 10^{-5}$  | -4.29  | $1.8 \times 10^{-5}$  |
|     | 6p21.32 | ENSG00000204308 | <i>RNF5</i>      | -1.92  | 0.055                 | -4.82  | $1.5 \times 10^{-6}$  |
|     | 6p21.32 | ENSG00000196735 | <i>HLA-DQA1</i>  | -1.80  | 0.072                 | -4.25  | $2.1 \times 10^{-5}$  |
|     | 6p21.32 | ENSG00000242574 | <i>HLA-DMB</i>   | -0.81  | 0.42                  | 5.00   | $5.6 \times 10^{-7}$  |
|     | 6p21.32 | ENSG00000196126 | <i>HLA-DRB1</i>  | -      | -                     | -4.50  | $6.8 \times 10^{-6}$  |
|     | 6p21.32 | ENSG00000237541 | <i>HLA-DQA2</i>  | 7.09   | $1.3 \times 10^{-12}$ | -      | -                     |
|     | 6p21.33 | ENSG00000204371 | <i>EHMT2</i>     | -6.95  | $3.7 \times 10^{-12}$ | -      | -                     |
|     | 6p21.32 | ENSG00000204305 | <i>AGER</i>      | 6.14   | $8.0 \times 10^{-10}$ | 7.45   | $9.5 \times 10^{-14}$ |
|     | 6p21.32 | ENSG00000232629 | <i>HLA-DQB2</i>  | 6.11   | $9.9 \times 10^{-10}$ | 5.97   | $2.4 \times 10^{-9}$  |
|     | 6p21.32 | ENSG00000179344 | <i>HLA-DQB1</i>  | -5.88  | $4.2 \times 10^{-9}$  | -0.31  | 0.76                  |
|     | 6p21.33 | ENSG00000213722 | <i>DDAH2</i>     | -5.44  | $5.5 \times 10^{-8}$  | -1.34  | 0.18                  |
|     | 6p21.32 | ENSG00000204308 | <i>RNF5</i>      | -5.02  | $5.2 \times 10^{-7}$  | -1.74  | 0.082                 |
|     | 6p21.32 | ENSG00000204310 | <i>AGPAT1</i>    | -4.85  | $1.2 \times 10^{-6}$  | 5.07   | $4.1 \times 10^{-7}$  |
| JCV | 6p21.33 | ENSG00000198563 | <i>DDX39B</i>    | -4.84  | $1.3 \times 10^{-6}$  | -0.43  | 0.67                  |
|     | 6p21.32 | ENSG00000240065 | <i>PSMB9</i>     | 4.47   | $7.7 \times 10^{-6}$  | 2.01   | 0.045                 |
|     | 6p21.33 | ENSG00000213760 | <i>ATP6V1G2</i>  | 2.80   | $5.1 \times 10^{-3}$  | -4.46  | $8.3 \times 10^{-6}$  |
|     | 11q13.4 | ENSG00000214517 | <i>PPME1</i>     | 2.22   | 0.026                 | 4.31   | $1.6 \times 10^{-5}$  |
|     | 6p21.32 | ENSG00000204264 | <i>PSMB8</i>     | 1.99   | 0.047                 | 4.17   | $3.0 \times 10^{-5}$  |
|     | 6p21.32 | ENSG00000204252 | <i>HLA-DOA</i>   | -0.68  | 0.50                  | -4.56  | $5.2 \times 10^{-6}$  |
|     | 6p21.32 | ENSG00000204315 | <i>FKBPL</i>     | 0.01   | 0.99                  | -4.53  | $6.0 \times 10^{-6}$  |
|     | 6p21.32 | ENSG00000196126 | <i>HLA-DRB1</i>  | -      | -                     | -7.50  | $6.5 \times 10^{-14}$ |
|     | 6p21.33 | ENSG00000204540 | <i>PSORS1C1</i>  | -      | -                     | -4.69  | $2.8 \times 10^{-6}$  |
|     | 6p21.33 | ENSG00000204444 | <i>APOM</i>      | -10.73 | $7.5 \times 10^{-27}$ | -10.47 | $1.1 \times 10^{-25}$ |
|     | 6p21.33 | ENSG00000231852 | <i>CYP21A2</i>   | 10.53  | $6.5 \times 10^{-26}$ | -      | -                     |
|     | 6p21.33 | ENSG00000224389 | <i>C4B</i>       | 10.47  | $1.2 \times 10^{-25}$ | -      | -                     |
|     | 6p21.33 | ENSG00000166278 | <i>C2</i>        | 10.29  | $8.1 \times 10^{-25}$ | -      | -                     |
|     | 6p21.33 | ENSG00000204386 | <i>NEU1</i>      | -10.28 | $8.4 \times 10^{-25}$ | -      | -                     |
|     | 6p21.33 | ENSG00000213719 | <i>CLIC1</i>     | -10.22 | $1.6 \times 10^{-24}$ | -10.22 | $1.6 \times 10^{-24}$ |
|     | 6p21.33 | ENSG00000244731 | <i>C4A</i>       | -10.19 | $2.3 \times 10^{-24}$ | -10.16 | $2.9 \times 10^{-24}$ |
|     | 6p22.1  | ENSG00000204613 | <i>TRIM10</i>    | -8.82  | $1.1 \times 10^{-18}$ | -      | -                     |
|     | 6p21.32 | ENSG00000204305 | <i>AGER</i>      | 8.69   | $3.6 \times 10^{-18}$ | 4.44   | $9.1 \times 10^{-6}$  |
| VZV | 6p21.33 | ENSG00000214894 | <i>LINC00243</i> | 8.01   | $1.1 \times 10^{-15}$ | -      | -                     |
|     | 6p22.1  | ENSG00000281831 | <i>HCP5B</i>     | 7.90   | $2.8 \times 10^{-15}$ | 1.53   | 0.13                  |
|     | 6p22.1  | ENSG00000187626 | <i>ZKSCAN4</i>   | 7.84   | $4.5 \times 10^{-15}$ | 7.24   | $4.4 \times 10^{-13}$ |
|     | 6p22.1  | ENSG00000204681 | <i>GABBR1</i>    | 7.29   | $3.1 \times 10^{-13}$ | 1.02   | 0.31                  |
|     | 6p22.1  | ENSG00000204657 | <i>OR2H2</i>     | 7.09   | $1.3 \times 10^{-12}$ | 0.27   | 0.79                  |
|     | 6p22.1  | ENSG00000204644 | <i>ZFP57</i>     | 7.09   | $1.4 \times 10^{-12}$ | -      | -                     |
|     | 6p21.33 | ENSG00000204435 | <i>CSNK2B</i>    | 7.06   | $1.7 \times 10^{-12}$ | -4.09  | $4.2 \times 10^{-5}$  |
|     | 6p22.2  | ENSG00000186470 | <i>BTN3A2</i>    | -6.91  | $4.8 \times 10^{-12}$ | -6.72  | $1.8 \times 10^{-11}$ |
|     | 6p21.32 | ENSG00000204257 | <i>HLA-DMA</i>   | 6.75   | $1.5 \times 10^{-11}$ | 6.76   | $1.3 \times 10^{-11}$ |



|         |                 |             |       |                       |       |                       |
|---------|-----------------|-------------|-------|-----------------------|-------|-----------------------|
| 6p22.1  | ENSG00000158691 | ZSCAN12     | -6.73 | 1.7×10 <sup>-11</sup> | 5.45  | 5.0×10 <sup>-8</sup>  |
| 6p21.32 | ENSG00000204304 | PBX2        | -6.28 | 3.5×10 <sup>-10</sup> | -1.48 | 0.14                  |
| 6p22.1  | ENSG00000189298 | ZKSCAN3     | 6.20  | 5.7×10 <sup>-10</sup> | -2.35 | 0.019                 |
| 6p22.1  | ENSG00000206503 | HLA-A       | -6.14 | 8.2×10 <sup>-10</sup> | 0.13  | 0.89                  |
| 6p22.1  | ENSG00000261353 | CTA-14H9.5  | -5.96 | 2.5×10 <sup>-9</sup>  | -     | -                     |
| 6p21.32 | ENSG00000179344 | HLA-DQB1    | -5.96 | 2.6×10 <sup>-9</sup>  | -6.33 | 2.5×10 <sup>-10</sup> |
| 6p22.1  | ENSG00000137185 | ZSCAN9      | -5.86 | 4.7×10 <sup>-9</sup>  | 7.84  | 4.6×10 <sup>-15</sup> |
| 6p21.32 | ENSG00000232629 | HLA-DQB2    | 5.79  | 7.0×10 <sup>-9</sup>  | 5.61  | 2.1×10 <sup>-8</sup>  |
| 6p21.33 | ENSG00000204536 | CCHCR1      | 5.72  | 1.1×10 <sup>-8</sup>  | 7.34  | 2.2×10 <sup>-13</sup> |
| 6p22.1  | ENSG00000197062 | ZSCAN26     | -5.57 | 2.5×10 <sup>-8</sup>  | -5.71 | 1.1×10 <sup>-8</sup>  |
| 6p21.33 | ENSG00000204463 | BAG6        | 5.52  | 3.3×10 <sup>-8</sup>  | -4.29 | 1.8×10 <sup>-5</sup>  |
| 6p22.2  | ENSG00000180596 | HIST1H2BC   | -5.46 | 4.8×10 <sup>-8</sup>  | -2.38 | 0.017                 |
| 6p22.1  | ENSG00000204655 | MOG         | 5.42  | 5.9×10 <sup>-8</sup>  | -     | -                     |
| 6p22.2  | ENSG00000272462 | U91328.19   | 5.02  | 5.1×10 <sup>-7</sup>  | 2.19  | 0.028                 |
| 6p21.33 | ENSG00000204396 | VWA7        | -4.90 | 9.5×10 <sup>-7</sup>  | 5.72  | 1.0×10 <sup>-8</sup>  |
| 6p21.33 | ENSG00000204388 | HSPA1B      | 4.89  | 1.0×10 <sup>-6</sup>  | -     | -                     |
| 6p21.32 | ENSG00000221988 | PPT2        | 4.79  | 1.6×10 <sup>-6</sup>  | -1.48 | 0.14                  |
| 6p22.1  | ENSG00000272468 | RP1-86C11.7 | -4.61 | 3.9×10 <sup>-6</sup>  | 1.12  | 0.26                  |
| 6p22.1  | ENSG00000234127 | TRIM26      | 4.56  | 5.0×10 <sup>-6</sup>  | 1.58  | 0.11                  |
| 6p22.1  | ENSG00000137338 | PGBD1       | 4.56  | 5.2×10 <sup>-6</sup>  | 1.34  | 0.18                  |
| 6p22.2  | ENSG00000010704 | HFE         | -4.42 | 9.8×10 <sup>-6</sup>  | -1.15 | 0.25                  |
| 6p22.1  | ENSG00000241370 | RPP21       | 4.41  | 1.0×10 <sup>-5</sup>  | -3.91 | 9.3×10 <sup>-5</sup>  |
| 6p21.33 | ENSG00000204371 | EHMT2       | -4.36 | 1.3×10 <sup>-5</sup>  | -     | -                     |
| 6p22.1  | ENSG00000204632 | HLA-G       | 4.24  | 2.2×10 <sup>-5</sup>  | -0.64 | 0.52                  |
| 6p22.2  | ENSG00000124508 | BTN2A2      | 4.22  | 2.5×10 <sup>-5</sup>  | -1.95 | 0.051                 |
| 6p21.32 | ENSG00000204310 | AGPAT1      | -3.70 | 2.2×10 <sup>-4</sup>  | 4.26  | 2.0×10 <sup>-5</sup>  |
| 6p21.33 | ENSG00000204387 | C6orf48     | -2.96 | 3.1×10 <sup>-3</sup>  | -4.18 | 3.0×10 <sup>-5</sup>  |
| 6p21.32 | ENSG00000204264 | PSMB8       | 2.89  | 3.8×10 <sup>-3</sup>  | 4.83  | 1.3×10 <sup>-6</sup>  |
| 6p21.33 | ENSG00000213722 | DDAH2       | -2.46 | 0.014                 | -8.27 | 1.3×10 <sup>-16</sup> |
| 6p21.32 | ENSG00000204301 | NOTCH4      | -2.37 | 0.018                 | -6.98 | 3.0×10 <sup>-12</sup> |
| 6p21.33 | ENSG00000204420 | MPIG6B      | 2.10  | 0.036                 | -5.68 | 1.4×10 <sup>-8</sup>  |
| 6p22.1  | ENSG00000112812 | PRSS16      | 2.03  | 0.043                 | 4.94  | 7.7×10 <sup>-7</sup>  |
| 6p22.1  | ENSG00000198315 | ZKSCAN8     | 1.66  | 0.097                 | -4.90 | 9.5×10 <sup>-7</sup>  |
| 6p21.33 | ENSG00000137411 | VAR2        | -1.64 | 0.10                  | -5.17 | 2.3×10 <sup>-7</sup>  |
| 6p21.33 | ENSG00000204410 | MSH5        | -1.45 | 0.15                  | -7.81 | 5.7×10 <sup>-15</sup> |
| 6p21.32 | ENSG00000213676 | ATF6B       | -1.36 | 0.18                  | -4.38 | 1.2×10 <sup>-5</sup>  |
| 6p21.33 | ENSG00000137312 | FLOT1       | 1.22  | 0.22                  | 6.32  | 2.6×10 <sup>-10</sup> |
| 6p21.33 | ENSG00000226979 | LTA         | -0.97 | 0.33                  | 4.09  | 4.3×10 <sup>-5</sup>  |
| 6p21.33 | ENSG00000213760 | ATP6V1G2    | 0.83  | 0.40                  | -5.43 | 5.8×10 <sup>-8</sup>  |
| 6p21.32 | ENSG00000204308 | RNF5        | -0.69 | 0.49                  | -9.65 | 5.2×10 <sup>-22</sup> |

|         |                 |                 |       |      |       |                       |
|---------|-----------------|-----------------|-------|------|-------|-----------------------|
| 6p21.32 | ENSG00000242574 | <i>HLA-DMB</i>  | 0.55  | 0.58 | 6.63  | $3.3 \times 10^{-11}$ |
| 6p21.32 | ENSG00000196735 | <i>HLA-DQA1</i> | -0.37 | 0.71 | -5.22 | $1.8 \times 10^{-7}$  |
| 6p21.33 | ENSG00000228022 | <i>HCG20</i>    | -     | -    | -5.62 | $1.9 \times 10^{-8}$  |
| 6p21.33 | ENSG00000204540 | <i>PSORS1C1</i> | -     | -    | -5.09 | $3.6 \times 10^{-7}$  |
| 6p21.33 | ENSG00000204531 | <i>POU5F1</i>   | -     | -    | 4.23  | $2.4 \times 10^{-5}$  |
| 10p14   | ENSG00000151657 | <i>KIN</i>      | -     | -    | 4.14  | $3.5 \times 10^{-5}$  |

**Supplementary Table 16:** TWAS results for EBV antigen response phenotypes that were analyzed using gene expression models based on whole blood, brain tissues, and EBV-transformed lymphocytes. Associations with  $P_{TWAS} < 4.2 \times 10^{-6}$  are considered statistically significant and genes with  $P_{TWAS} < 4.5 \times 10^{-5}$  are considered suggestive.

| Antigen     | Region      | Gene ID         | Gene             | Whole Blood     |                       | Brain (Frontal Cortex) |                       | EBV Lymphocytes       |                       |
|-------------|-------------|-----------------|------------------|-----------------|-----------------------|------------------------|-----------------------|-----------------------|-----------------------|
|             |             |                 |                  | Z               | $P_{TWAS}$            | Z                      | $P_{TWAS}$            | Z                     | $P_{TWAS}$            |
| EBV<br>EA-D | 6p21.32     | ENSG00000204257 | <i>HLA-DMA</i>   | -5.91           | $3.5 \times 10^{-9}$  | -5.93                  | $3.0 \times 10^{-9}$  | 5.88                  | $4.0 \times 10^{-9}$  |
|             | 6p21.33     | ENSG00000204444 | <i>APOM</i>      | 5.86            | $4.6 \times 10^{-9}$  | 5.73                   | $1.0 \times 10^{-8}$  | 5.45                  | $5.1 \times 10^{-8}$  |
|             | 6p21.33     | ENSG00000166278 | <i>C2</i>        | -5.70           | $1.2 \times 10^{-8}$  | -                      | -                     | -                     | -                     |
|             | 6p21.33     | ENSG00000244731 | <i>C4A</i>       | 5.66            | $1.5 \times 10^{-8}$  | 5.55                   | $2.9 \times 10^{-8}$  | 5.59                  | $2.3 \times 10^{-8}$  |
|             | 6p21.33     | ENSG00000204386 | <i>NEU1</i>      | 5.59            | $2.3 \times 10^{-8}$  | -                      | -                     | -1.65                 | 0.099                 |
|             | 6p21.33     | ENSG00000213719 | <i>CLIC1</i>     | 5.55            | $2.9 \times 10^{-8}$  | 5.55                   | $2.9 \times 10^{-8}$  | 1.14                  | 0.25                  |
|             | 6p21.33     | ENSG00000224389 | <i>C4B</i>       | -5.43           | $5.6 \times 10^{-8}$  | -                      | -                     | -                     | -                     |
|             | 6p21.33     | ENSG00000231852 | <i>CYP21A2</i>   | -5.41           | $6.4 \times 10^{-8}$  | -                      | -                     | -                     | -                     |
|             | 6p22.1      | ENSG00000281831 | <i>HCP5B</i>     | -4.66           | $3.2 \times 10^{-6}$  | -5.30                  | $1.1 \times 10^{-7}$  | -6.01                 | $1.9 \times 10^{-9}$  |
|             | 6p22.1      | ENSG00000204625 | <i>HCG9</i>      | -4.52           | $6.2 \times 10^{-6}$  | -                      | -                     | -                     | -                     |
|             | 6p22.1      | ENSG00000204613 | <i>TRIM10</i>    | 4.48            | $7.6 \times 10^{-6}$  | -                      | -                     | -                     | -                     |
|             | 6p21.33     | ENSG00000204388 | <i>HSPA1B</i>    | -4.43           | $9.3 \times 10^{-6}$  | -                      | -                     | 1.61                  | 0.11                  |
|             | 6p21.33     | ENSG00000214894 | <i>LINC00243</i> | -4.38           | $1.2 \times 10^{-5}$  | -                      | -                     | 1.19                  | 0.23                  |
|             | 6q22.1      | ENSG00000188820 | <i>FAM26F</i>    | 4.26            | $2.0 \times 10^{-5}$  | 4.68                   | $2.8 \times 10^{-6}$  | 3.41                  | $6.4 \times 10^{-4}$  |
|             | 6p21.33     | ENSG00000204536 | <i>CCHCR1</i>    | -3.77           | $1.7 \times 10^{-4}$  | -4.75                  | $2.1 \times 10^{-6}$  | 0.40                  | 0.69                  |
|             | 20q11.23    | ENSG00000080839 | <i>RBL1</i>      | -2.68           | $7.3 \times 10^{-3}$  | -2.28                  | 0.022                 | -4.10                 | $4.2 \times 10^{-5}$  |
|             | 12q23.1     | ENSG00000139343 | <i>SNRPF</i>     | -2.46           | 0.014                 | -4.12                  | $3.9 \times 10^{-5}$  | -4.13                 | $3.6 \times 10^{-5}$  |
|             | 6p21.33     | ENSG00000204410 | <i>MSH5</i>      | -2.40           | 0.016                 | 5.71                   | $1.2 \times 10^{-8}$  | -1.32                 | 0.19                  |
|             | 6p21.32     | ENSG00000242574 | <i>HLA-DMB</i>   | 2.00            | 0.046                 | -5.80                  | $6.8 \times 10^{-9}$  | -2.59                 | $9.7 \times 10^{-3}$  |
|             | 6p21.32     | ENSG00000232629 | <i>HLA-DQB2</i>  | 1.48            | 0.14                  | 1.31                   | 0.19                  | 4.15                  | $3.3 \times 10^{-5}$  |
|             | 6p21.33     | ENSG00000204482 | <i>LST1</i>      | 0.87            | 0.39                  | -                      | -                     | -4.34                 | $1.4 \times 10^{-5}$  |
|             | 6p21.33     | ENSG00000204560 | <i>DHX16</i>     | 0.72            | 0.47                  | 0.07                   | 0.94                  | -4.17                 | $3.1 \times 10^{-5}$  |
|             | 6p21.32     | ENSG00000198502 | <i>HLA-DRB5</i>  | -               | -                     | -                      | -                     | -5.85                 | $4.8 \times 10^{-9}$  |
|             | 6p21.33     | ENSG00000204531 | <i>POU5F1</i>    | -               | -                     | -1.64                  | 0.10                  | -5.40                 | $6.7 \times 10^{-8}$  |
|             | 6p21.33     | ENSG00000204540 | <i>PSORS1C1</i>  | -               | -                     | 4.43                   | $9.6 \times 10^{-6}$  | 4.67                  | $3.0 \times 10^{-6}$  |
|             | 6p21.33     | ENSG00000228022 | <i>HCG20</i>     | -               | -                     | 4.10                   | $4.2 \times 10^{-5}$  | 3.58                  | $3.5 \times 10^{-4}$  |
|             | 6p21.32     | ENSG00000196126 | <i>HLA-DRB1</i>  | -               | -                     | -4.38                  | $1.2 \times 10^{-5}$  | -                     | -                     |
|             | EBV<br>EBNA | 6p21.32         | ENSG00000179344  | <i>HLA-DQB1</i> | 13.30                 | $2.2 \times 10^{-40}$  | 11.46                 | $2.2 \times 10^{-30}$ | 10.67                 |
| 6p21.32     |             | ENSG00000232629 | <i>HLA-DQB2</i>  | -12.19          | $3.6 \times 10^{-34}$ | -12.16                 | $5.0 \times 10^{-34}$ | -3.78                 | $1.6 \times 10^{-4}$  |
| 6p21.32     |             | ENSG00000204305 | <i>AGER</i>      | -10.70          | $9.9 \times 10^{-27}$ | -8.91                  | $5.1 \times 10^{-19}$ | -7.28                 | $3.4 \times 10^{-13}$ |
| 6p21.33     |             | ENSG00000204371 | <i>EHMT2</i>     | 9.43            | $4.0 \times 10^{-21}$ | -                      | -                     | -                     | -                     |
| 6p21.33     |             | ENSG00000213722 | <i>DDAH2</i>     | 9.00            | $2.2 \times 10^{-19}$ | 7.76                   | $8.6 \times 10^{-15}$ | 0.01                  | 1.00                  |
| 6p21.33     |             | ENSG00000204435 | <i>CSNK2B</i>    | -7.62           | $2.5 \times 10^{-14}$ | 3.36                   | $7.8 \times 10^{-4}$  | -1.61                 | 0.11                  |
| 6p21.32     |             | ENSG00000204308 | <i>RNF5</i>      | 7.53            | $5.0 \times 10^{-14}$ | 9.45                   | $3.6 \times 10^{-21}$ | 10.17                 | $2.8 \times 10^{-24}$ |

EBV  
EBNA

|         |                 |                 |       |                       |       |                       |       |                       |
|---------|-----------------|-----------------|-------|-----------------------|-------|-----------------------|-------|-----------------------|
| 6p21.32 | ENSG00000204304 | <i>PBX2</i>     | 7.31  | $2.7 \times 10^{-13}$ | 4.05  | $5.1 \times 10^{-5}$  | 4.05  | $5.1 \times 10^{-5}$  |
| 6p21.33 | ENSG00000204444 | <i>APOM</i>     | 7.30  | $2.8 \times 10^{-13}$ | 7.16  | $7.8 \times 10^{-13}$ | 6.14  | $8.2 \times 10^{-10}$ |
| 6p21.32 | ENSG00000204310 | <i>AGPAT1</i>   | 7.30  | $3.0 \times 10^{-13}$ | -7.57 | $3.7 \times 10^{-14}$ | -     | -                     |
| 6p21.33 | ENSG00000204463 | <i>BAG6</i>     | -7.07 | $1.5 \times 10^{-12}$ | 3.26  | $1.1 \times 10^{-3}$  | 2.51  | 0.012                 |
| 6p21.32 | ENSG00000204315 | <i>FKBPL</i>    | -6.74 | $1.6 \times 10^{-11}$ | 4.81  | $1.5 \times 10^{-6}$  | -     | -                     |
| 6p21.33 | ENSG00000224389 | <i>C4B</i>      | -6.43 | $1.3 \times 10^{-10}$ | -     | -                     | -     | -                     |
| 6p21.33 | ENSG00000231852 | <i>CYP21A2</i>  | -6.41 | $1.4 \times 10^{-10}$ | -     | -                     | -     | -                     |
| 6p21.33 | ENSG00000213719 | <i>CLIC1</i>    | 6.21  | $5.3 \times 10^{-10}$ | 6.21  | $5.3 \times 10^{-10}$ | 6.98  | $3.0 \times 10^{-12}$ |
| 6p21.33 | ENSG00000166278 | <i>C2</i>       | -6.21 | $5.3 \times 10^{-10}$ | -     | -                     | -     | -                     |
| 6p21.33 | ENSG00000204386 | <i>NEU1</i>     | 6.14  | $8.2 \times 10^{-10}$ | -     | -                     | -2.05 | 0.040                 |
| 6p21.33 | ENSG00000204536 | <i>CCHCR1</i>   | -5.94 | $2.9 \times 10^{-9}$  | -5.82 | $6.0 \times 10^{-9}$  | 3.30  | $9.7 \times 10^{-4}$  |
| 6p21.33 | ENSG00000227507 | <i>LTB</i>      | 5.77  | $7.8 \times 10^{-9}$  | -     | -                     | -     | -                     |
| 3q25.1  | ENSG00000169313 | <i>P2RY12</i>   | 5.53  | $3.3 \times 10^{-8}$  | 5.20  | $2.0 \times 10^{-7}$  | 5.20  | $2.0 \times 10^{-7}$  |
| 6p21.33 | ENSG00000244731 | <i>C4A</i>      | 5.30  | $1.2 \times 10^{-7}$  | 5.83  | $5.6 \times 10^{-9}$  | 7.18  | $6.8 \times 10^{-13}$ |
| 6p21.32 | ENSG00000236104 | <i>ZBTB22</i>   | -5.13 | $2.9 \times 10^{-7}$  | -3.73 | $1.9 \times 10^{-4}$  | -     | -                     |
| 6p21.32 | ENSG00000204314 | <i>PRRT1</i>    | -5.02 | $5.1 \times 10^{-7}$  | -     | -                     | -9.99 | $1.6 \times 10^{-23}$ |
| 6p21.33 | ENSG00000204396 | <i>VWA7</i>     | 4.96  | $7.0 \times 10^{-7}$  | -6.57 | $4.9 \times 10^{-11}$ | 0.42  | 0.68                  |
| 6p21.32 | ENSG00000204209 | <i>DAXX</i>     | 4.94  | $7.8 \times 10^{-7}$  | 0.19  | 0.85                  | 4.55  | $5.3 \times 10^{-6}$  |
| 6p21.32 | ENSG00000237541 | <i>HLA-DQA2</i> | -4.84 | $1.3 \times 10^{-6}$  | -     | -                     | -     | -                     |
| 6p21.32 | ENSG00000204257 | <i>HLA-DMA</i>  | -4.69 | $2.7 \times 10^{-6}$  | -4.54 | $5.5 \times 10^{-6}$  | 4.64  | $3.5 \times 10^{-6}$  |
| 6p21.32 | ENSG00000227057 | <i>WDR46</i>    | -4.54 | $5.6 \times 10^{-6}$  | -1.86 | 0.063                 | -1.86 | 0.063                 |
| 6p21.33 | ENSG00000204366 | <i>ZBTB12</i>   | -4.44 | $8.9 \times 10^{-6}$  | 3.02  | $2.5 \times 10^{-3}$  | 0.26  | 0.80                  |
| 6p21.33 | ENSG00000204420 | <i>MPIG6B</i>   | -4.44 | $9.0 \times 10^{-6}$  | 2.89  | $3.8 \times 10^{-3}$  | 4.44  | $9.0 \times 10^{-6}$  |
| 6p21.33 | ENSG00000204344 | <i>STK19</i>    | 4.44  | $9.1 \times 10^{-6}$  | 1.21  | 0.23                  | -     | -                     |
| 6p21.32 | ENSG00000231925 | <i>TAPBP</i>    | -4.37 | $1.2 \times 10^{-5}$  | -5.18 | $2.3 \times 10^{-7}$  | 5.42  | $5.9 \times 10^{-8}$  |
| 6p22.1  | ENSG00000204625 | <i>HCG9</i>     | -4.25 | $2.1 \times 10^{-5}$  | -     | -                     | -     | -                     |
| 6p21.32 | ENSG00000196735 | <i>HLA-DQA1</i> | 4.18  | $2.9 \times 10^{-5}$  | 11.93 | $8.8 \times 10^{-33}$ | 0.87  | 0.38                  |
| 6p21.32 | ENSG00000221988 | <i>PPT2</i>     | -3.72 | $2.0 \times 10^{-4}$  | -0.59 | 0.55                  | -6.36 | $2.0 \times 10^{-10}$ |
| 6p22.1  | ENSG00000281831 | <i>HCP5B</i>    | -3.49 | $4.9 \times 10^{-4}$  | -4.24 | $2.3 \times 10^{-5}$  | -5.08 | $3.7 \times 10^{-7}$  |
| 6p21.33 | ENSG00000206344 | <i>HCG27</i>    | -3.22 | $1.3 \times 10^{-3}$  | 0.74  | 0.46                  | -5.86 | $4.6 \times 10^{-9}$  |
| 6p21.33 | ENSG00000232810 | <i>TNF</i>      | 3.06  | $2.2 \times 10^{-3}$  | 3.06  | $2.2 \times 10^{-3}$  | -7.43 | $1.1 \times 10^{-13}$ |
| 6p21.33 | ENSG00000213760 | <i>ATP6V1G2</i> | -3.04 | $2.4 \times 10^{-3}$  | 3.58  | $3.5 \times 10^{-4}$  | -4.89 | $9.9 \times 10^{-7}$  |
| 6p21.32 | ENSG00000204252 | <i>HLA-DOA</i>  | 2.45  | 0.014                 | 7.80  | $6.3 \times 10^{-15}$ | 1.84  | 0.066                 |
| 6p21.33 | ENSG00000204410 | <i>MSH5</i>     | -2.04 | 0.041                 | 5.27  | $1.4 \times 10^{-7}$  | 1.68  | 0.093                 |
| 6p21.32 | ENSG00000231389 | <i>HLA-DPA1</i> | -1.97 | 0.049                 | -5.49 | $4.1 \times 10^{-8}$  | 0.33  | 0.74                  |
| 6p21.32 | ENSG00000223865 | <i>HLA-DPB1</i> | 1.96  | 0.050                 | -6.35 | $2.1 \times 10^{-10}$ | -     | -                     |
| 6p22.1  | ENSG00000234127 | <i>TRIM26</i>   | 1.34  | 0.18                  | -4.69 | $2.7 \times 10^{-6}$  | 1.34  | 0.18                  |
| 6p21.32 | ENSG00000242574 | <i>HLA-DMB</i>  | 1.22  | 0.22                  | -5.05 | $4.4 \times 10^{-7}$  | -3.61 | $3.1 \times 10^{-4}$  |
| 6p21.33 | ENSG00000204469 | <i>PRRC2A</i>   | -1.20 | 0.23                  | 0.62  | 0.53                  | -7.58 | $3.5 \times 10^{-14}$ |
| 6p21.32 | ENSG00000204228 | <i>HSD17B8</i>  | 1.16  | 0.25                  | 4.63  | $3.7 \times 10^{-6}$  | 1.14  | 0.26                  |

|             |         |                 |                  |       |                       |       |                       |       |                       |
|-------------|---------|-----------------|------------------|-------|-----------------------|-------|-----------------------|-------|-----------------------|
| EBV<br>EBNA | 6p21.33 | ENSG00000204388 | <i>HSPA1B</i>    | 1.05  | 0.30                  | -     | -                     | 4.46  | $8.4 \times 10^{-6}$  |
|             | 6p21.33 | ENSG00000226979 | <i>LTA</i>       | -0.75 | 0.45                  | -5.76 | $8.6 \times 10^{-9}$  | -5.71 | $1.1 \times 10^{-8}$  |
|             | 6p21.32 | ENSG00000204231 | <i>RXRΒ</i>      | -0.67 | 0.50                  | 4.54  | $5.7 \times 10^{-6}$  | 0.67  | 0.50                  |
|             | 3q25.1  | ENSG00000181631 | <i>P2RY13</i>    | 0.48  | 0.63                  | 5.72  | $1.1 \times 10^{-8}$  | -0.13 | 0.90                  |
|             | 6p21.32 | ENSG00000204301 | <i>NOTCH4</i>    | 0.36  | 0.72                  | 4.41  | $1.0 \times 10^{-5}$  | 2.12  | 0.034                 |
|             | 6p21.33 | ENSG00000204389 | <i>HSPA1A</i>    | -     | -                     | -     | -                     | 8.81  | $1.3 \times 10^{-18}$ |
|             | 6p21.33 | ENSG00000204531 | <i>POU5F1</i>    | -     | -                     | -4.32 | $1.5 \times 10^{-5}$  | -6.23 | $4.7 \times 10^{-10}$ |
|             | 6p21.32 | ENSG00000198502 | <i>HLA-DRB5</i>  | -     | -                     | -     | -                     | 5.24  | $1.6 \times 10^{-7}$  |
|             | 6p21.33 | ENSG00000168631 | <i>DPCR1</i>     | -     | -                     | -     | -                     | 4.92  | $8.5 \times 10^{-7}$  |
|             | 6p21.33 | ENSG00000204540 | <i>PSORS1C1</i>  | -     | -                     | 4.89  | $1.0 \times 10^{-6}$  | 4.91  | $9.3 \times 10^{-7}$  |
|             | 6p21.33 | ENSG00000137337 | <i>MDC1</i>      | -     | -                     | -     | -                     | 4.73  | $2.2 \times 10^{-6}$  |
|             | 6p21.32 | ENSG00000204287 | <i>HLA-DRA</i>   | -     | -                     | -     | -                     | 4.67  | $3.0 \times 10^{-6}$  |
|             | 6p21.32 | ENSG00000168477 | <i>TNXB</i>      | -     | -                     | -     | -                     | 4.25  | $2.2 \times 10^{-5}$  |
|             | 6p21.33 | ENSG00000228789 | <i>HCG22</i>     | -     | -                     | -4.47 | $7.7 \times 10^{-6}$  | 3.27  | $1.1 \times 10^{-3}$  |
|             | 6p21.32 | ENSG00000196126 | <i>HLA-DRB1</i>  | -     | -                     | 13.05 | $6.7 \times 10^{-39}$ | -     | -                     |
|             | 6p22.1  | ENSG00000270604 | <i>HCG17</i>     | -     | -                     | 4.16  | $3.3 \times 10^{-5}$  | -     | -                     |
| EBV p18     | 6p21.33 | ENSG00000213722 | <i>DDAH2</i>     | 9.74  | $2.0 \times 10^{-22}$ | 6.03  | $1.6 \times 10^{-9}$  | 1.85  | 0.064                 |
|             | 6p21.33 | ENSG00000204371 | <i>EHMT2</i>     | 9.56  | $1.2 \times 10^{-21}$ | -     | -                     | -     | -                     |
|             | 6p21.32 | ENSG00000204305 | <i>AGER</i>      | -8.39 | $4.8 \times 10^{-17}$ | -8.90 | $5.4 \times 10^{-19}$ | -5.02 | $5.1 \times 10^{-7}$  |
|             | 6p21.33 | ENSG00000204463 | <i>BAG6</i>      | -8.20 | $2.5 \times 10^{-16}$ | -2.14 | 0.032                 | -1.18 | 0.24                  |
|             | 6p21.33 | ENSG00000204536 | <i>CCHCR1</i>    | -6.66 | $2.7 \times 10^{-11}$ | -5.05 | $4.4 \times 10^{-7}$  | 0.09  | 0.93                  |
|             | 6p21.33 | ENSG00000227507 | <i>LTB</i>       | 6.65  | $3.0 \times 10^{-11}$ | -     | -                     | -     | -                     |
|             | 6p21.33 | ENSG00000213760 | <i>ATP6V1G2</i>  | -6.36 | $2.0 \times 10^{-10}$ | 2.65  | $8.1 \times 10^{-3}$  | -7.02 | $2.2 \times 10^{-12}$ |
|             | 6p21.32 | ENSG00000179344 | <i>HLA-DQB1</i>  | 5.79  | $7.1 \times 10^{-9}$  | 5.74  | $9.8 \times 10^{-9}$  | 4.65  | $3.3 \times 10^{-6}$  |
|             | 6p21.33 | ENSG00000137310 | <i>TCF19</i>     | -5.76 | $8.6 \times 10^{-9}$  | -3.44 | $5.9 \times 10^{-4}$  | 3.65  | $2.6 \times 10^{-4}$  |
|             | 6p21.32 | ENSG00000204310 | <i>AGPAT1</i>    | 5.72  | $1.1 \times 10^{-8}$  | -6.10 | $1.1 \times 10^{-9}$  | -     | -                     |
|             | 6p21.32 | ENSG00000232629 | <i>HLA-DQB2</i>  | -5.61 | $2.1 \times 10^{-8}$  | -5.64 | $1.7 \times 10^{-8}$  | -1.74 | 0.082                 |
|             | 6p21.33 | ENSG00000214894 | <i>LINC00243</i> | -5.60 | $2.2 \times 10^{-8}$  | -     | -                     | -0.16 | 0.87                  |
|             | 6p21.32 | ENSG00000237541 | <i>HLA-DQA2</i>  | -5.41 | $6.5 \times 10^{-8}$  | -     | -                     | -     | -                     |
|             | 6p21.33 | ENSG00000166278 | <i>C2</i>        | -5.35 | $8.9 \times 10^{-8}$  | -     | -                     | -     | -                     |
|             | 6p22.2  | ENSG00000186470 | <i>BTN3A2</i>    | 5.33  | $9.9 \times 10^{-8}$  | 5.05  | $4.4 \times 10^{-7}$  | 5.25  | $1.5 \times 10^{-7}$  |
|             | 6p21.33 | ENSG00000213719 | <i>CLIC1</i>     | 5.31  | $1.1 \times 10^{-7}$  | 5.31  | $1.1 \times 10^{-7}$  | 6.84  | $8.2 \times 10^{-12}$ |
|             | 6p21.33 | ENSG00000204386 | <i>NEU1</i>      | 5.26  | $1.5 \times 10^{-7}$  | -     | -                     | -1.05 | 0.29                  |
|             | 6p21.33 | ENSG00000204396 | <i>VWA7</i>      | 5.21  | $1.9 \times 10^{-7}$  | -6.23 | $4.8 \times 10^{-10}$ | 1.10  | 0.27                  |
|             | 6p21.33 | ENSG00000204469 | <i>PRRC2A</i>    | -5.16 | $2.4 \times 10^{-7}$  | 0.77  | 0.44                  | -8.33 | $8.1 \times 10^{-17}$ |
|             | 6p21.33 | ENSG00000206344 | <i>HCG27</i>     | -5.11 | $3.3 \times 10^{-7}$  | -1.61 | 0.11                  | -8.68 | $4.1 \times 10^{-18}$ |
|             | 6p21.33 | ENSG00000224389 | <i>C4B</i>       | -5.03 | $4.9 \times 10^{-7}$  | -     | -                     | -     | -                     |
|             | 6p21.33 | ENSG00000204444 | <i>APOM</i>      | 4.97  | $6.6 \times 10^{-7}$  | 4.83  | 1.4-6                 | 5.38  | $7.5 \times 10^{-8}$  |
|             | 6p21.33 | ENSG00000231852 | <i>CYP21A2</i>   | -4.95 | $7.3 \times 10^{-7}$  | -     | -                     | -     | -                     |
|             | 6p21.32 | ENSG00000204304 | <i>PBX2</i>      | 4.83  | $1.4 \times 10^{-6}$  | 0.20  | 0.84                  | 0.20  | 0.84                  |

|         |          |                 |                          |       |                      |       |                       |        |                       |
|---------|----------|-----------------|--------------------------|-------|----------------------|-------|-----------------------|--------|-----------------------|
|         | 6p22.2   | ENSG00000124508 | <i>BTN2A2</i>            | -4.70 | 2.6×10 <sup>-6</sup> | -0.72 | 0.47                  | 5.06   | 4.2×10 <sup>-7</sup>  |
|         | 6p22.1   | ENSG00000261353 | <i>CTA-14H9.5</i>        | 4.67  | 3.0×10 <sup>-6</sup> | -     | -                     | -3.65  | 2.6×10 <sup>-4</sup>  |
|         | 6p22.1   | ENSG00000137185 | <i>ZSCAN9</i>            | 4.53  | 6.0×10 <sup>-6</sup> | -4.40 | 1.1×10 <sup>-5</sup>  | 4.40   | 1.1×10 <sup>-5</sup>  |
|         | 6p22.1   | ENSG00000197279 | <i>ZNF165</i>            | -4.50 | 6.9×10 <sup>-6</sup> | -0.76 | 0.45                  | -2.03  | 0.042                 |
|         | 6p22.1   | ENSG00000158691 | <i>ZSCAN12</i>           | 4.45  | 8.6×10 <sup>-6</sup> | -3.27 | 1.1×10 <sup>-3</sup>  | 4.46   | 8.1×10 <sup>-6</sup>  |
|         | 6p22.1   | ENSG00000187626 | <i>ZKSCAN4</i>           | -4.42 | 1.0×10 <sup>-5</sup> | -4.79 | 1.7×10 <sup>-6</sup>  | -4.79  | 1.7×10 <sup>-6</sup>  |
|         | 19q13.12 | ENSG00000126243 | <i>LRFN3</i>             | 4.34  | 1.4×10 <sup>-5</sup> | 4.14  | 3.5×10 <sup>-5</sup>  | 4.47   | 7.8×10 <sup>-6</sup>  |
|         | 9q21.11  | ENSG00000226337 | <i>RP11-274B18.4</i>     | -4.22 | 2.5×10 <sup>-5</sup> | -     | -                     | -      | -                     |
|         | 19q13.12 | ENSG00000011600 | <i>TYROBP</i>            | -4.22 | 2.5×10 <sup>-5</sup> | 4.22  | 2.5×10 <sup>-5</sup>  | -      | -                     |
|         | 6p22.1   | ENSG00000197062 | <i>ZSCAN26</i>           | 4.18  | 2.9×10 <sup>-5</sup> | 4.33  | 1.5×10 <sup>-5</sup>  | 3.86   | 1.1×10 <sup>-4</sup>  |
|         | 6p22.1   | ENSG00000272468 | <i>RP1-86C11.7</i>       | 4.17  | 3.1×10 <sup>-5</sup> | -0.93 | 0.35                  | -      | -                     |
|         | 6p21.32  | ENSG00000204257 | <i>HLA-DMA</i>           | -4.15 | 3.4×10 <sup>-5</sup> | -4.11 | 3.9×10 <sup>-5</sup>  | 4.16   | 3.2×10 <sup>-5</sup>  |
|         | 6p22.1   | ENSG00000204613 | <i>TRIM10</i>            | 4.10  | 4.2×10 <sup>-5</sup> | -     | -                     | -      | -                     |
|         | 6p21.33  | ENSG00000244731 | <i>C4A</i>               | 4.01  | 6.1×10 <sup>-5</sup> | 4.24  | 2.2×10 <sup>-5</sup>  | 5.60   | 2.2×10 <sup>-8</sup>  |
|         | 6p21.32  | ENSG00000241106 | <i>HLA-DOB</i>           | 3.97  | 7.1×10 <sup>-5</sup> | 4.54  | 5.6×10 <sup>-6</sup>  | -1.10  | 0.27                  |
|         | 6p21.33  | ENSG00000204435 | <i>CSNK2B</i>            | -3.97 | 7.1×10 <sup>-5</sup> | 6.41  | 1.4×10 <sup>-10</sup> | -3.45  | 5.5×10 <sup>-4</sup>  |
|         | 6p21.32  | ENSG00000204301 | <i>NOTCH4</i>            | -3.93 | 8.4×10 <sup>-5</sup> | 4.70  | 2.6×10 <sup>-6</sup>  | 0.84   | 0.40                  |
|         | 6p21.32  | ENSG00000204308 | <i>RNF5</i>              | 3.66  | 2.5×10 <sup>-4</sup> | 5.59  | 2.3×10 <sup>-8</sup>  | 5.96   | 2.5×10 <sup>-9</sup>  |
|         | 6p21.33  | ENSG00000204516 | <i>MICB</i>              | -3.62 | 3.0×10 <sup>-4</sup> | 2.97  | 3.0×10 <sup>-3</sup>  | -8.06  | 7.4×10 <sup>-16</sup> |
| EBV p18 | 6p22.1   | ENSG00000233822 | <i>HIST1H2BN</i>         | 3.36  | 7.8×10 <sup>-4</sup> | 0.83  | 0.41                  | 4.69   | 2.8×10 <sup>-6</sup>  |
|         | 6p21.32  | ENSG00000204267 | <i>TAP2</i>              | -3.09 | 2.0×10 <sup>-3</sup> | -4.22 | 2.4×10 <sup>-5</sup>  | -4.09  | 4.2×10 <sup>-5</sup>  |
|         | 6p21.33  | ENSG00000204387 | <i>C6orf48</i>           | 3.04  | 2.3×10 <sup>-3</sup> | 3.78  | 1.5×10 <sup>-4</sup>  | 4.85   | 1.2×10 <sup>-6</sup>  |
|         | 6p21.33  | ENSG00000204482 | <i>LST1</i>              | 3.00  | 2.7×10 <sup>-3</sup> | -     | -                     | -4.52  | 6.1×10 <sup>-6</sup>  |
|         | 6p21.33  | ENSG00000204520 | <i>MICA</i>              | 2.52  | 0.012                | 1.90  | 0.057                 | 5.60   | 2.1×10 <sup>-8</sup>  |
|         | 6p21.33  | ENSG00000272221 | <i>XXbac-BPG181B23.7</i> | 2.09  | 0.037                | 4.52  | 6.1×10 <sup>-6</sup>  | -0.37  | 0.71                  |
|         | 6p21.32  | ENSG00000204228 | <i>HSD17B8</i>           | 1.87  | 0.062                | 4.81  | 1.5×10 <sup>-6</sup>  | 2.47   | 0.014                 |
|         | 5q31.1   | ENSG00000164402 | <i>SEPTIN8</i>           | 1.65  | 0.098                | 4.42  | 9.9×10 <sup>-6</sup>  | -1.95  | 0.051                 |
|         | 6p21.32  | ENSG00000204252 | <i>HLA-DOA</i>           | -1.34 | 0.18                 | 6.56  | 5.5×10 <sup>-11</sup> | -1.13  | 0.26                  |
|         | 6p22.2   | ENSG00000111801 | <i>BTN3A3</i>            | -0.93 | 0.35                 | -4.68 | 2.8×10 <sup>-6</sup>  | 0.25   | 0.80                  |
|         | 6p21.32  | ENSG00000242574 | <i>HLA-DMB</i>           | -0.87 | 0.38                 | -4.40 | 1.1×10 <sup>-5</sup>  | -3.24  | 1.2×10 <sup>-3</sup>  |
|         | 6p21.33  | ENSG00000204472 | <i>AIF1</i>              | 0.86  | 0.39                 | -3.01 | 2.6×10 <sup>-3</sup>  | -4.21  | 2.6×10 <sup>-5</sup>  |
|         | 6p21.32  | ENSG00000204314 | <i>PRRT1</i>             | 0.68  | 0.50                 | -     | -                     | -5.91  | 3.5×10 <sup>-9</sup>  |
|         | 6p21.33  | ENSG00000226979 | <i>LTA</i>               | -0.65 | 0.51                 | -6.72 | 1.8×10 <sup>-11</sup> | -6.64  | 3.1×10 <sup>-11</sup> |
|         | 6p22.1   | ENSG00000198315 | <i>ZKSCAN8</i>           | 0.62  | 0.53                 | 5.15  | 2.7×10 <sup>-7</sup>  | -0.01  | 1.00                  |
|         | 6p21.32  | ENSG00000204248 | <i>COL11A2</i>           | -0.60 | 0.55                 | 4.15  | 3.3×10 <sup>-5</sup>  | 1.64   | 0.10                  |
|         | 6p21.32  | ENSG00000196735 | <i>HLA-DQA1</i>          | 0.50  | 0.62                 | 6.81  | 1.0×10 <sup>-11</sup> | 1.01   | 0.31                  |
|         | 6p21.33  | ENSG00000232810 | <i>TNF</i>               | 0.48  | 0.63                 | 0.48  | 0.63                  | -10.43 | 1.8×10 <sup>-25</sup> |
|         | 22q13.1  | ENSG00000278195 | <i>SSTR3</i>             | 0.23  | 0.82                 | -4.70 | 2.6×10 <sup>-6</sup>  | 1.23   | 0.22                  |
|         | 6p21.33  | ENSG00000204531 | <i>POU5F1</i>            | -     | -                    | -5.64 | 1.7×10 <sup>-8</sup>  | -5.84  | 5.2×10 <sup>-9</sup>  |

|           |                 |                 |                  |                      |                       |                      |                       |                      |                       |
|-----------|-----------------|-----------------|------------------|----------------------|-----------------------|----------------------|-----------------------|----------------------|-----------------------|
| EBV p18   | 6p21.33         | ENSG00000228022 | <i>HCG20</i>     | -                    | -                     | 5.10                 | $3.4 \times 10^{-7}$  | 5.70                 | $1.2 \times 10^{-8}$  |
|           | 6p21.33         | ENSG00000204389 | <i>HSPA1A</i>    | -                    | -                     | -                    | -                     | 5.65                 | $1.6 \times 10^{-8}$  |
|           | 6p22.1          | ENSG00000184357 | <i>HIST1H1B</i>  | -                    | -                     | -                    | -                     | -4.85                | $1.2 \times 10^{-6}$  |
|           | 6p21.33         | ENSG00000137337 | <i>MDC1</i>      | -                    | -                     | -                    | -                     | 4.76                 | $1.9 \times 10^{-6}$  |
|           | 6p21.33         | ENSG00000204540 | <i>PSORS1C1</i>  | -                    | -                     | 4.99                 | $6.0 \times 10^{-7}$  | 4.15                 | $3.3 \times 10^{-5}$  |
|           | 6p21.33         | ENSG00000168631 | <i>DPCR1</i>     | -                    | -                     | -                    | -                     | 4.10                 | $4.1 \times 10^{-5}$  |
|           | 6p21.33         | ENSG00000228789 | <i>HCG22</i>     | -                    | -                     | -4.33                | $1.5 \times 10^{-5}$  | 3.03                 | $2.4 \times 10^{-3}$  |
|           | 6p21.32         | ENSG00000196126 | <i>HLA-DRB1</i>  | -                    | -                     | 7.02                 | $2.2 \times 10^{-12}$ | -                    | -                     |
|           | 6p21.32         | ENSG00000232629 | <i>HLA-DQB2</i>  | 8.87                 | $7.6 \times 10^{-19}$ | 8.54                 | $1.4 \times 10^{-17}$ | 5.29                 | $1.3 \times 10^{-7}$  |
|           | 6p21.32         | ENSG00000179344 | <i>HLA-DQB1</i>  | -8.56                | $1.1 \times 10^{-17}$ | 1.04                 | 0.30                  | -11.40               | $4.1 \times 10^{-30}$ |
|           | 6p21.32         | ENSG00000204257 | <i>HLA-DMA</i>   | -7.28                | $3.4 \times 10^{-13}$ | -7.45                | $9.5 \times 10^{-14}$ | 7.32                 | $2.6 \times 10^{-13}$ |
|           | 6p21.33         | ENSG00000214894 | <i>LINC00243</i> | -6.89                | $5.6 \times 10^{-12}$ | -                    | -                     | -0.22                | 0.82                  |
|           | 6p21.33         | ENSG00000244731 | <i>C4A</i>       | 6.80                 | $1.1 \times 10^{-11}$ | 6.46                 | $1.0 \times 10^{-10}$ | 6.54                 | $6.0 \times 10^{-11}$ |
|           | 6p21.33         | ENSG00000166278 | <i>C2</i>        | -6.42                | $1.4 \times 10^{-10}$ | -                    | -                     | -                    | -                     |
|           | 6p21.33         | ENSG00000204386 | <i>NEU1</i>      | 6.39                 | $1.6 \times 10^{-10}$ | -                    | -                     | -2.35                | 0.019                 |
|           | 6p21.33         | ENSG00000213719 | <i>CLIC1</i>     | 6.20                 | $5.6 \times 10^{-10}$ | 6.20                 | $5.6 \times 10^{-10}$ | -0.45                | 0.65                  |
|           | 6p21.33         | ENSG00000224389 | <i>C4B</i>       | -6.17                | $7.0 \times 10^{-10}$ | -                    | -                     | -                    | -                     |
|           | 6p21.33         | ENSG00000231852 | <i>CYP21A2</i>   | -6.16                | $7.5 \times 10^{-10}$ | -                    | -                     | -                    | -                     |
|           | 6p21.33         | ENSG00000204444 | <i>APOM</i>      | 6.13                 | $8.6 \times 10^{-10}$ | 5.97                 | $2.3 \times 10^{-9}$  | 6.18                 | $6.6 \times 10^{-10}$ |
|           | 6p21.33         | ENSG00000228727 | <i>SAPCD1</i>    | -6.06                | $1.4 \times 10^{-9}$  | -1.18                | 0.24                  | -6.06                | $1.4 \times 10^{-9}$  |
|           | 6p21.33         | ENSG00000146112 | <i>PPP1R18</i>   | -5.71                | $1.1 \times 10^{-8}$  | 0.84                 | 0.40                  | -5.77                | $8.1 \times 10^{-9}$  |
|           | 6p21.33         | ENSG00000204351 | <i>SKIV2L</i>    | 5.70                 | $1.2 \times 10^{-8}$  | 5.76                 | $8.2 \times 10^{-9}$  | 6.13                 | $8.7 \times 10^{-10}$ |
|           | 6p21.33         | ENSG00000204396 | <i>VWA7</i>      | 5.49                 | $4.0 \times 10^{-8}$  | -4.62                | $3.9 \times 10^{-6}$  | 4.31                 | $1.6 \times 10^{-5}$  |
| EBV ZEBRA | 6p21.33         | ENSG00000204392 | <i>LSM2</i>      | -5.43                | $5.7 \times 10^{-8}$  | -5.01                | $5.4 \times 10^{-7}$  | -5.01                | $5.4 \times 10^{-7}$  |
|           | 6p21.33         | ENSG00000227507 | <i>LTB</i>       | 5.28                 | $1.3 \times 10^{-7}$  | -                    | -                     | -                    | -                     |
|           | 6p21.33         | ENSG00000204388 | <i>HSPA1B</i>    | -5.27                | $1.4 \times 10^{-7}$  | -                    | -                     | -2.17                | 0.030                 |
|           | 6p21.33         | ENSG00000204564 | <i>C6orf136</i>  | 5.06                 | $4.1 \times 10^{-7}$  | 0.38                 | 0.70                  | 5.05                 | $4.4 \times 10^{-7}$  |
|           | 6p21.32         | ENSG00000204315 | <i>FKBPL</i>     | 5.03                 | $4.9 \times 10^{-7}$  | -0.60                | 0.55                  | -                    | -                     |
|           | 6p21.32         | ENSG00000204252 | <i>HLA-DOA</i>   | -4.98                | $6.5 \times 10^{-7}$  | 1.48                 | 0.14                  | -4.95                | $7.5 \times 10^{-7}$  |
|           | 6p21.33         | ENSG00000204536 | <i>CCHCR1</i>    | -4.96                | $7.0 \times 10^{-7}$  | -5.72                | $1.1 \times 10^{-8}$  | -1.37                | 0.17                  |
|           | 6p21.33         | ENSG00000204463 | <i>BAG6</i>      | -4.86                | $1.2 \times 10^{-6}$  | 0.80                 | 0.42                  | 1.20                 | 0.23                  |
|           | 6p22.1          | ENSG00000204592 | <i>HLA-E</i>     | -4.66                | $3.2 \times 10^{-6}$  | -4.66                | $3.2 \times 10^{-6}$  | -4.66                | $3.2 \times 10^{-6}$  |
|           | 6p22.1          | ENSG00000204613 | <i>TRIM10</i>    | 4.60                 | $4.2 \times 10^{-6}$  | -                    | -                     | -                    | -                     |
|           | 6p21.33         | ENSG00000204525 | <i>HLA-C</i>     | -4.60                | $4.3 \times 10^{-6}$  | 1.19                 | 0.23                  | -5.39                | $7.1 \times 10^{-8}$  |
|           | 6p21.32         | ENSG00000196735 | <i>HLA-DQA1</i>  | -4.57                | $5.0 \times 10^{-6}$  | -6.72                | $1.8 \times 10^{-11}$ | -4.09                | $4.4 \times 10^{-5}$  |
|           | 22q11.21        | ENSG00000185608 | <i>MRPL40</i>    | 4.49                 | $7.1 \times 10^{-6}$  | 3.96                 | $7.5 \times 10^{-5}$  | 4.48                 | $7.5 \times 10^{-6}$  |
|           | 4q24            | ENSG00000109320 | <i>NFKB1</i>     | -4.37                | $1.2 \times 10^{-5}$  | 3.88                 | $1.1 \times 10^{-4}$  | 0.94                 | 0.35                  |
|           | 6p21.33         | ENSG00000204394 | <i>VARS</i>      | 4.32                 | $1.5 \times 10^{-5}$  | 0.44                 | 0.66                  | 0.44                 | 0.66                  |
|           | 6p22.1          | ENSG00000281831 | <i>HCP5B</i>     | -4.29                | $1.8 \times 10^{-5}$  | -5.24                | $1.6 \times 10^{-7}$  | -4.40                | $1.1 \times 10^{-5}$  |
| 6p21.32   | ENSG00000241404 | <i>EGFL8</i>    | -4.26            | $2.0 \times 10^{-5}$ | -2.58                 | $9.8 \times 10^{-3}$ | -4.90                 | $9.6 \times 10^{-7}$ |                       |

EBV  
ZEBRA

|         |                 |                     |       |                      |        |                       |        |                       |   |
|---------|-----------------|---------------------|-------|----------------------|--------|-----------------------|--------|-----------------------|---|
| 6p22.1  | ENSG00000204625 | <i>HCG9</i>         | -4.16 | 3.1×10 <sup>-5</sup> | -      | -                     | -      | -                     | - |
| 6p21.33 | ENSG00000204356 | <i>NELFE</i>        | -4.14 | 3.4×10 <sup>-5</sup> | 0.77   | 0.44                  | -      | -                     | - |
| 6p22.1  | ENSG00000158691 | <i>ZSCAN12</i>      | 4.10  | 4.1×10 <sup>-5</sup> | -0.49  | 0.63                  | 3.19   | 1.4×10 <sup>-3</sup>  | - |
| 6p21.33 | ENSG00000204428 | <i>LY6G5C</i>       | -3.48 | 5.1×10 <sup>-4</sup> | -3.48  | 5.1×10 <sup>-4</sup>  | -6.49  | 8.8×10 <sup>-11</sup> | - |
| 6p22.1  | ENSG00000204619 | <i>PPP1R11</i>      | 3.39  | 7.1×10 <sup>-4</sup> | 0.08   | 0.94                  | 5.08   | 3.8×10 <sup>-7</sup>  | - |
| 6p21.33 | ENSG00000204438 | <i>GPANK1</i>       | 2.81  | 4.9×10 <sup>-3</sup> | 2.21   | 0.027                 | 4.36   | 1.3×10 <sup>-5</sup>  | - |
| 6p21.32 | ENSG00000242574 | <i>HLA-DMB</i>      | 2.70  | 6.9×10 <sup>-3</sup> | -7.33  | 2.3×10 <sup>-13</sup> | 0.72   | 0.47                  | - |
| 6p21.32 | ENSG00000204261 | <i>PSMB8-AS1</i>    | -2.67 | 7.6×10 <sup>-3</sup> | 2.36   | 0.018                 | 4.26   | 2.0×10 <sup>-5</sup>  | - |
| 6p21.32 | ENSG00000204267 | <i>TAP2</i>         | -2.21 | 0.027                | -4.76  | 2.0×10 <sup>-6</sup>  | -3.92  | 9.0×10 <sup>-5</sup>  | - |
| 6p21.33 | ENSG00000226979 | <i>LTA</i>          | 2.05  | 0.040                | -6.15  | 7.6×10 <sup>-10</sup> | -5.29  | 1.3×10 <sup>-7</sup>  | - |
| 6p22.1  | ENSG00000198315 | <i>ZKSCAN8</i>      | 2.00  | 0.046                | 4.54   | 5.7×10 <sup>-6</sup>  | -0.78  | 0.44                  | - |
| 6p21.32 | ENSG00000231389 | <i>HLA-DPA1</i>     | 1.75  | 0.079                | 5.52   | 3.5×10 <sup>-8</sup>  | 2.44   | 0.015                 | - |
| 6p21.33 | ENSG00000204482 | <i>LST1</i>         | 1.53  | 0.13                 | -      | -                     | -6.81  | 1.0×10 <sup>-11</sup> | - |
| 6p21.33 | ENSG00000213760 | <i>ATP6V1G2</i>     | 1.44  | 0.15                 | 4.23   | 2.4×10 <sup>-5</sup>  | 2.55   | 0.011                 | - |
| 6p21.33 | ENSG00000204435 | <i>CSNK2B</i>       | -1.25 | 0.21                 | 4.91   | 9.3×10 <sup>-7</sup>  | -3.55  | 3.9×10 <sup>-4</sup>  | - |
| 6p21.33 | ENSG00000204410 | <i>MSH5</i>         | -0.82 | 0.41                 | 5.67   | 1.4×10 <sup>-8</sup>  | -0.02  | 0.98                  | - |
| 6p21.32 | ENSG00000221988 | <i>PPT2</i>         | -0.59 | 0.55                 | 4.90   | 9.6×10 <sup>-7</sup>  | -3.68  | 2.3×10 <sup>-4</sup>  | - |
| 6p21.33 | ENSG00000137312 | <i>FLOT1</i>        | 0.54  | 0.59                 | -5.77  | 8.1×10 <sup>-9</sup>  | -1.41  | 0.16                  | - |
| 6p21.32 | ENSG00000198502 | <i>HLA-DRB5</i>     | -     | -                    | -      | -                     | -14.09 | 4.2×10 <sup>-45</sup> | - |
| 6p21.32 | ENSG00000204287 | <i>HLA-DRA</i>      | -     | -                    | -      | -                     | 8.48   | 2.2×10 <sup>-17</sup> | - |
| 6p21.33 | ENSG00000204531 | <i>POU5F1</i>       | -     | -                    | 0.64   | 0.52                  | -6.11  | 9.9×10 <sup>-10</sup> | - |
| 6p21.33 | ENSG00000204574 | <i>ABCF1</i>        | -     | -                    | -      | -                     | -5.74  | 9.3×10 <sup>-9</sup>  | - |
| 6p21.33 | ENSG00000204540 | <i>PSORS1C1</i>     | -     | -                    | 6.24   | 4.4×10 <sup>-10</sup> | 5.25   | 1.5×10 <sup>-7</sup>  | - |
| 6p21.32 | ENSG00000168394 | <i>TAP1</i>         | -     | -                    | -2.30  | 0.022                 | 4.76   | 2.0×10 <sup>-6</sup>  | - |
| 6p21.33 | ENSG00000228022 | <i>HCG20</i>        | -     | -                    | 5.05   | 4.4×10 <sup>-7</sup>  | 3.92   | 8.9×10 <sup>-5</sup>  | - |
| 6p21.32 | ENSG00000196126 | <i>HLA-DRB1</i>     | -     | -                    | -12.01 | 3.3×10 <sup>-33</sup> | -      | -                     | - |
| 6p22.1  | ENSG00000271755 | <i>RP1-153G14.4</i> | -     | -                    | 4.16   | 3.2×10 <sup>-5</sup>  | -      | -                     | - |



**Supplementary Table 17:** TWAS results for MCV antigen response using gene expression models based on whole blood, brain, and skin tissues. Associations with  $P_{TWAS} < 4.2 \times 10^{-6}$  are considered statistically significant and genes with  $P_{TWAS} < 4.5 \times 10^{-5}$  are considered suggestive.

| Region  | Gene ID         | Gene            | Whole Blood |                      | Brain (Frontal Cortex) |                       | Skin (Sun Exposed) |                       | Skin (Sun Unexposed) |                       |
|---------|-----------------|-----------------|-------------|----------------------|------------------------|-----------------------|--------------------|-----------------------|----------------------|-----------------------|
|         |                 |                 | Z           | $P_{TWAS}$           | Z                      | $P_{TWAS}$            | Z                  | $P_{TWAS}$            | Z                    | $P_{TWAS}$            |
| 6p21.33 | ENSG00000204396 | <i>VWA7</i>     | -5.89       | $4.0 \times 10^{-9}$ | 5.42                   | $6.0 \times 10^{-8}$  | -4.91              | $9.0 \times 10^{-7}$  | -4.85                | $1.2 \times 10^{-6}$  |
| 6p21.33 | ENSG00000204371 | <i>EHMT2</i>    | -5.88       | $4.0 \times 10^{-9}$ | -                      | -                     | -2.68              | $7.5 \times 10^{-3}$  | -2.66                | $7.9 \times 10^{-3}$  |
| 6p21.33 | ENSG00000204564 | <i>C6orf136</i> | -5.76       | $8.2 \times 10^{-9}$ | -0.97                  | 0.33                  | -2.75              | $6.0 \times 10^{-3}$  | -2.58                | $9.9 \times 10^{-3}$  |
| 6p21.33 | ENSG00000213722 | <i>DDAH2</i>    | -5.68       | $1.4 \times 10^{-8}$ | -1.49                  | 0.14                  | -3.94              | $8.2 \times 10^{-5}$  | -                    | -                     |
| 5q31.2  | ENSG00000170464 | <i>DNAJC18</i>  | 4.82        | $1.5 \times 10^{-6}$ | 6.07                   | $1.3 \times 10^{-9}$  | 3.39               | $6.9 \times 10^{-4}$  | 3.40                 | $6.7 \times 10^{-4}$  |
| 6p21.33 | ENSG00000227507 | <i>LTB</i>      | -4.72       | $2.3 \times 10^{-6}$ | -                      | -                     | -                  | -                     | -                    | -                     |
| 5q31.2  | ENSG00000228672 | <i>PROB1</i>    | -4.64       | $3.6 \times 10^{-6}$ | -3.29                  | $1.0 \times 10^{-3}$  | -                  | -                     | -6.75                | $1.5 \times 10^{-11}$ |
| 6p21.33 | ENSG00000204388 | <i>HSPA1B</i>   | -4.48       | $7.4 \times 10^{-6}$ | -                      | -                     | -                  | -                     | -                    | -                     |
| 6p22.1  | ENSG00000204599 | <i>TRIM39</i>   | -4.36       | $1.3 \times 10^{-5}$ | -0.43                  | 0.67                  | 0.20               | 0.84                  | -0.11                | 0.91                  |
| 5q31.2  | ENSG00000170482 | <i>SLC23A1</i>  | -4.34       | $1.4 \times 10^{-5}$ | -4.07                  | $4.7 \times 10^{-5}$  | 4.39               | $1.1 \times 10^{-5}$  | 4.07                 | $4.7 \times 10^{-5}$  |
| 5q31.2  | ENSG00000170469 | <i>SPATA24</i>  | 4.20        | $2.7 \times 10^{-5}$ | -                      | -                     | 4.30               | $1.7 \times 10^{-5}$  | 4.29                 | $1.8 \times 10^{-5}$  |
| 6p22.1  | ENSG00000204632 | <i>HLA-G</i>    | 4.11        | $3.9 \times 10^{-5}$ | -1.45                  | 0.15                  | 0.19               | 0.85                  | 0.11                 | 0.92                  |
| 5q31.2  | ENSG00000184584 | <i>TMEM173</i>  | -4.08       | $4.5 \times 10^{-5}$ | -4.28                  | $1.9 \times 10^{-5}$  | -4.17              | $3.0 \times 10^{-5}$  | -4.20                | $2.6 \times 10^{-5}$  |
| 6p21.32 | ENSG00000241106 | <i>HLA-DOB</i>  | -3.84       | $1.2 \times 10^{-4}$ | -5.30                  | $1.2 \times 10^{-7}$  | -3.59              | $3.3 \times 10^{-4}$  | -4.73                | $2.3 \times 10^{-6}$  |
| 6p22.1  | ENSG00000204619 | <i>PPP1R11</i>  | -3.46       | $5.4 \times 10^{-4}$ | 0.64                   | 0.52                  | 4.21               | $2.5 \times 10^{-5}$  | 4.20                 | $2.7 \times 10^{-5}$  |
| 6p21.32 | ENSG00000204267 | <i>TAP2</i>     | 3.32        | $9.1 \times 10^{-4}$ | 3.11                   | $1.9 \times 10^{-3}$  | 5.52               | $3.4 \times 10^{-8}$  | 3.18                 | $1.5 \times 10^{-3}$  |
| 6p21.33 | ENSG00000226979 | <i>LTA</i>      | 2.94        | $3.3 \times 10^{-3}$ | 5.07                   | $4.0 \times 10^{-7}$  | 0.88               | 0.38                  | 1.33                 | 0.18                  |
| 6p21.32 | ENSG00000204314 | <i>PRRT1</i>    | -2.80       | $5.1 \times 10^{-3}$ | -                      | -                     | 5.75               | $9.2 \times 10^{-9}$  | 5.72                 | $1.1 \times 10^{-8}$  |
| 5q31.2  | ENSG00000249751 | <i>ECSCR</i>    | 2.38        | 0.018                | 7.83                   | $5.0 \times 10^{-15}$ | 7.25               | $4.2 \times 10^{-13}$ | 7.83                 | $5.0 \times 10^{-15}$ |
| 6p22.1  | ENSG00000234127 | <i>TRIM26</i>   | -2.24       | 0.025                | -1.64                  | 0.10                  | -6.21              | $5.3 \times 10^{-10}$ | -5.47                | $4.6 \times 10^{-8}$  |
| 6p21.33 | ENSG00000204498 | <i>NFKBIL1</i>  | -2.19       | 0.029                | -1.94                  | 0.052                 | -4.16              | $3.2 \times 10^{-5}$  | -3.32                | $9.0 \times 10^{-4}$  |
| 6p21.32 | ENSG00000204305 | <i>AGER</i>     | 0.91        | 0.36                 | 5.83                   | $5.6 \times 10^{-9}$  | 1.87               | 0.062                 | 0.28                 | 0.78                  |
| 5q31.2  | ENSG00000131508 | <i>UBE2D2</i>   | -           | -                    | 4.33                   | $1.5 \times 10^{-5}$  | -                  | -                     | -                    | -                     |

**Supplementary Table 18:** TWAS results for seropositivity using gene expression models based on whole blood, brain, and skin tissues. Only statistically significant associations with  $P_{\text{TWAS}} < 4.2 \times 10^{-6}$  are presented.

| Antigen                   | Region  | Gene ID         | Gene            | Whole Blood |                       | Brain (Frontal Cortex) |                       |
|---------------------------|---------|-----------------|-----------------|-------------|-----------------------|------------------------|-----------------------|
|                           |         |                 |                 | Z           | $P_{\text{TWAS}}$     | Z                      | $P_{\text{TWAS}}$     |
| EBV<br>EA-D <sup>1</sup>  | 6p21.33 | ENSG00000204388 | <i>HSPA1B</i>   | -6.33       | $2.5 \times 10^{-10}$ | -                      | -                     |
|                           | 6p21.33 | ENSG00000204371 | <i>EHMT2</i>    | -5.77       | $8.0 \times 10^{-9}$  | -                      | -                     |
|                           | 6p21.33 | ENSG00000244731 | <i>C4A</i>      | 5.58        | $2.4 \times 10^{-8}$  | 5.27                   | $1.4 \times 10^{-7}$  |
|                           | 6p21.33 | ENSG00000166278 | <i>C2</i>       | -4.88       | $1.0 \times 10^{-6}$  | -                      | -                     |
|                           | 6p21.33 | ENSG00000204469 | <i>PRRC2A</i>   | 4.84        | $1.3 \times 10^{-6}$  | -                      | -                     |
|                           | 6p21.33 | ENSG00000231852 | <i>CYP21A2</i>  | -4.78       | $1.7 \times 10^{-6}$  | -                      | -                     |
|                           | 6p21.33 | ENSG00000213719 | <i>CLIC1</i>    | 4.76        | $2.0 \times 10^{-6}$  | 4.76                   | $2.0 \times 10^{-6}$  |
|                           | 6p21.33 | ENSG00000224389 | <i>C4B</i>      | -4.76       | $2.0 \times 10^{-6}$  | -                      | -                     |
|                           | 6p21.33 | ENSG00000204386 | <i>NEU1</i>     | 4.75        | $2.1 \times 10^{-6}$  | -                      | -                     |
|                           | 6p22.3  | ENSG00000137177 | <i>KIF13A</i>   | -4.65       | $3.3 \times 10^{-6}$  | -                      | -                     |
|                           | 6p21.32 | ENSG00000196126 | <i>HLA-DRB1</i> | -           | -                     | -6.87                  | $6.4 \times 10^{-12}$ |
|                           | 6p21.32 | ENSG00000204305 | <i>AGER</i>     | -           | -                     | 5.77                   | $8.1 \times 10^{-9}$  |
|                           | 6p21.33 | ENSG00000204420 | <i>MPIG6B</i>   | -           | -                     | 4.71                   | $2.5 \times 10^{-6}$  |
|                           | 6p21.32 | ENSG00000213676 | <i>ATF6B</i>    | -           | -                     | 4.80                   | $1.6 \times 10^{-6}$  |
| EBV<br>EBNA <sup>1</sup>  | 6p21.32 | ENSG00000179344 | <i>HLA-DQB1</i> | 8.37        | $5.6 \times 10^{-17}$ | -                      | -                     |
|                           | 6p21.32 | ENSG00000232629 | <i>HLA-DQB2</i> | -8.10       | $5.7 \times 10^{-16}$ | -7.95                  | $1.9 \times 10^{-15}$ |
|                           | 6p21.32 | ENSG00000237541 | <i>HLA-DQA2</i> | -5.46       | $4.8 \times 10^{-8}$  | -                      | -                     |
|                           | 6p21.32 | ENSG00000196126 | <i>HLA-DRB1</i> | -           | -                     | 7.78                   | $7.0 \times 10^{-15}$ |
|                           | 6p21.32 | ENSG00000196735 | <i>HLA-DQA1</i> | -           | -                     | 6.91                   | $4.7 \times 10^{-12}$ |
|                           | 6p21.32 | ENSG00000204252 | <i>HLA-DOA</i>  | -           | -                     | 4.79                   | $1.7 \times 10^{-6}$  |
|                           | 6p21.32 | ENSG00000231389 | <i>HLA-DPA1</i> | -           | -                     | -5.20                  | $2.0 \times 10^{-7}$  |
| EBV<br>ZEBRA <sup>1</sup> | 6p21.33 | ENSG00000244731 | <i>C4A</i>      | 4.64        | $3.5 \times 10^{-6}$  | -                      | -                     |
|                           | 6p21.32 | ENSG00000196126 | <i>HLA-DRB1</i> | -           | -                     | -5.95                  | $2.7 \times 10^{-9}$  |
| VZV <sup>1</sup>          | 4p15.2  | ENSG00000109680 | <i>TBC1D19</i>  | -4.96       | $7.2 \times 10^{-7}$  | -                      | -                     |
| JCV                       | 6p21.32 | ENSG00000237541 | <i>HLA-DQA2</i> | 9.68        | $3.5 \times 10^{-22}$ | -                      | -                     |
|                           | 6p21.33 | ENSG00000204371 | <i>EHMT2</i>    | -9.30       | $1.4 \times 10^{-20}$ | -                      | -                     |
|                           | 6p21.32 | ENSG00000179344 | <i>HLA-DQB1</i> | -8.05       | $8.4 \times 10^{-16}$ | -                      | -                     |
|                           | 6p21.32 | ENSG00000232629 | <i>HLA-DQB2</i> | 7.98        | $1.5 \times 10^{-15}$ | 7.85                   | $4.3 \times 10^{-15}$ |
|                           | 6p21.32 | ENSG00000204305 | <i>AGER</i>     | 7.82        | $5.3 \times 10^{-15}$ | 10.39                  | $2.8 \times 10^{-25}$ |
|                           | 6p21.33 | ENSG00000213722 | <i>DDAH2</i>    | -7.46       | $8.5 \times 10^{-14}$ | -                      | -                     |
|                           | 6p21.32 | ENSG00000204310 | <i>AGPAT1</i>   | -6.80       | $1.0 \times 10^{-11}$ | 7.80                   | $6.0 \times 10^{-15}$ |
|                           | 6p21.32 | ENSG00000204308 | <i>RNF5</i>     | -6.13       | $9.0 \times 10^{-10}$ | -                      | -                     |
|                           | 6p21.33 | ENSG00000204396 | <i>VWA7</i>     | -5.64       | $1.7 \times 10^{-8}$  | 4.98                   | $6.4 \times 10^{-7}$  |
|                           | 6p21.33 | ENSG00000227507 | <i>LTB</i>      | -5.56       | $2.8 \times 10^{-8}$  | -                      | -                     |
|                           | 6p21.33 | ENSG00000204463 | <i>BAG6</i>     | 5.30        | $1.2 \times 10^{-7}$  | -                      | -                     |
|                           | 6p21.32 | ENSG00000196126 | <i>HLA-DRB1</i> | -           | -                     | -9.995                 | $1.6 \times 10^{-23}$ |

|  |         |                 |                  |       |                       |       |                       |
|--|---------|-----------------|------------------|-------|-----------------------|-------|-----------------------|
|  | 6p21.32 | ENSG00000196735 | <i>HLA-DQA1</i>  | -     | -                     | -5.73 | $9.8 \times 10^{-9}$  |
|  | 6p21.32 | ENSG00000204252 | <i>HLA-DOA</i>   | -     | -                     | -5.90 | $3.6 \times 10^{-9}$  |
|  | 6p21.32 | ENSG00000204261 | <i>PSMB8-AS1</i> | -     | -                     | -5.36 | $8.1 \times 10^{-8}$  |
|  | 6p21.32 | ENSG00000204264 | <i>PSMB8</i>     | -     | -                     | 5.71  | $1.2 \times 10^{-8}$  |
|  | 6p21.32 | ENSG00000204301 | <i>NOTCH4</i>    | -     | -                     | -5.85 | $5.0 \times 10^{-9}$  |
|  | 6p21.33 | ENSG00000213760 | <i>ATP6V1G2</i>  | -     | -                     | -4.98 | $6.2 \times 10^{-7}$  |
|  | 6p21.33 | ENSG00000226979 | <i>LTA</i>       | -     | -                     | 5.81  | $6.2 \times 10^{-9}$  |
|  | 6p21.33 | ENSG00000204371 | <i>EHMT2</i>     | -8.64 | $5.8 \times 10^{-18}$ | -     | -                     |
|  | 6p21.33 | ENSG00000213722 | <i>DDAH2</i>     | -8.49 | $2.2 \times 10^{-17}$ | -4.69 | $2.7 \times 10^{-6}$  |
|  | 6p21.33 | ENSG00000227507 | <i>LTB</i>       | -8.24 | $1.7 \times 10^{-16}$ | -     | -                     |
|  | 6p21.33 | ENSG00000204396 | <i>VWA7</i>      | -6.20 | $5.7 \times 10^{-10}$ | 5.40  | $6.7 \times 10^{-8}$  |
|  | 6p21.32 | ENSG00000204305 | <i>AGER</i>      | 5.27  | $1.4 \times 10^{-7}$  | 9.35  | $9.0 \times 10^{-21}$ |
|  | 6p21.32 | ENSG00000240065 | <i>PSMB9</i>     | 5.18  | $2.2 \times 10^{-7}$  | -     | -                     |
|  | 6p21.33 | ENSG00000146112 | <i>PPP1R18</i>   | 5.11  | $3.2 \times 10^{-7}$  | -     | -                     |
|  | 6p21.32 | ENSG00000241106 | <i>HLA-DOB</i>   | -4.75 | $2.0 \times 10^{-6}$  | -5.79 | $7.1 \times 10^{-9}$  |
|  | 6p21.32 | ENSG00000237541 | <i>HLA-DQA2</i>  | 4.72  | $2.3 \times 10^{-6}$  | -     | -                     |
|  | 6p21.32 | ENSG00000179344 | <i>HLA-DQB1</i>  | -     | -                     | -6.79 | $1.1 \times 10^{-11}$ |
|  | 6p21.32 | ENSG00000196126 | <i>HLA-DRB1</i>  | -     | -                     | -5.41 | $6.4 \times 10^{-8}$  |
|  | 6p21.32 | ENSG00000196735 | <i>HLA-DQA1</i>  | -     | -                     | -6.48 | $9.4 \times 10^{-11}$ |
|  | 6p21.32 | ENSG00000204310 | <i>AGPAT1</i>    | -     | -                     | 4.92  | $8.5 \times 10^{-7}$  |
|  | 6p21.33 | ENSG00000226979 | <i>LTA</i>       | -     | -                     | 8.84  | $9.9 \times 10^{-19}$ |
|  | 6p21.33 | ENSG00000228789 | <i>HCG22</i>     | -     | -                     | 5.40  | $6.5 \times 10^{-8}$  |
|  | 5q31.2  | ENSG00000249751 | <i>ECSCR</i>     | -     | -                     | 5.63  | $1.8 \times 10^{-8}$  |

MCV

**Supplementary Figure 1:** Manhattan plots visualizing genome-wide association results for continuous antibody response phenotypes (MFI z-scores) and dichotomous seropositivity phenotypes for each antigen.

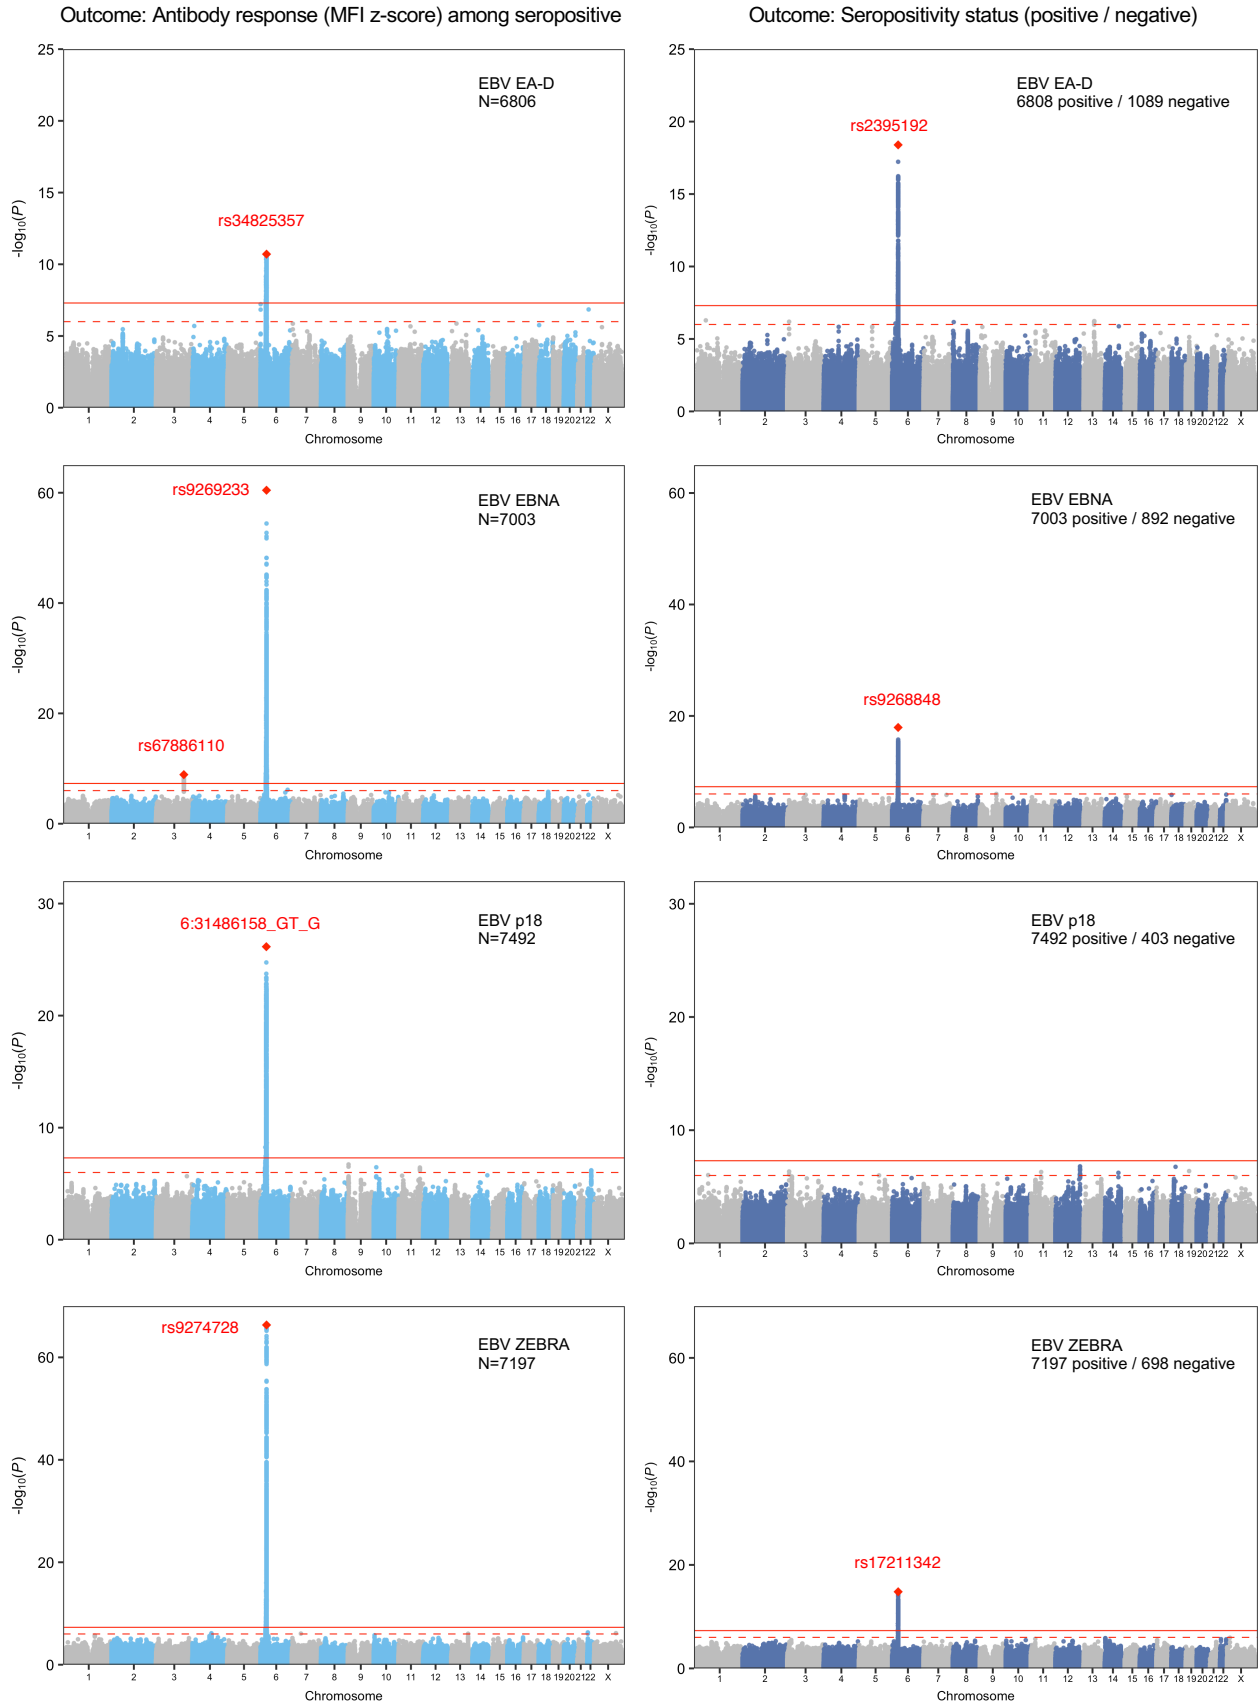

Outcome: Antibody response (MFI z-score) among seropositive

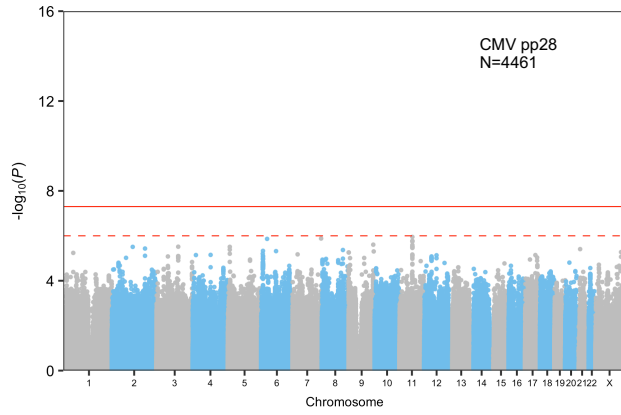

Outcome: Seropositivity status (positive / negative)

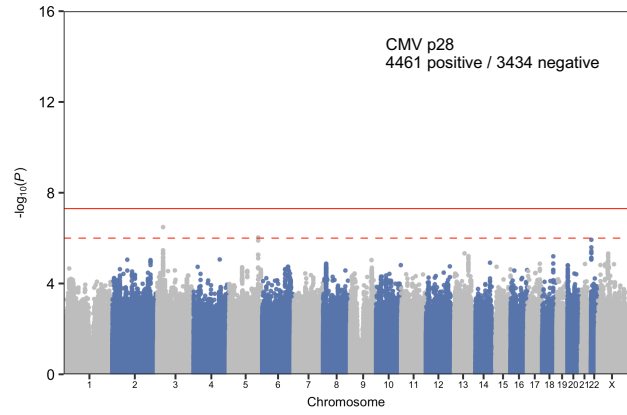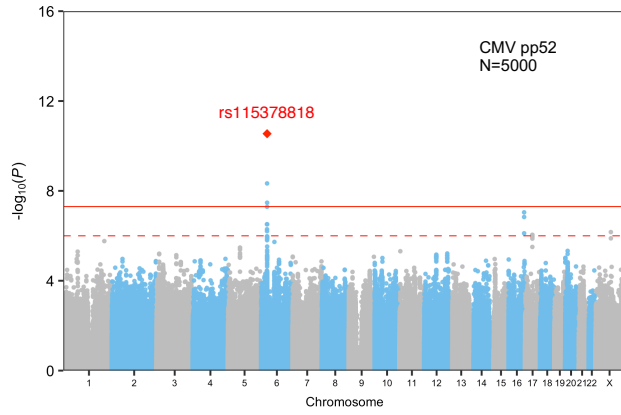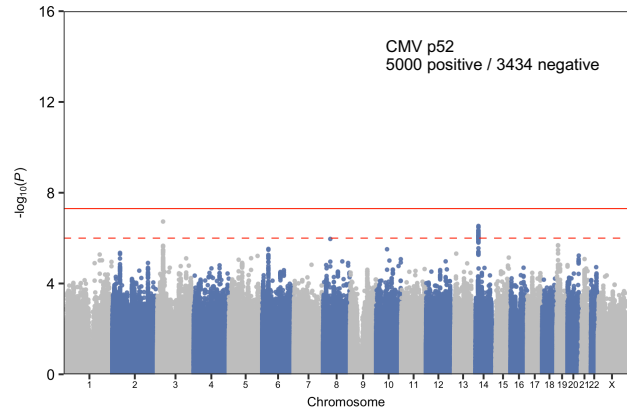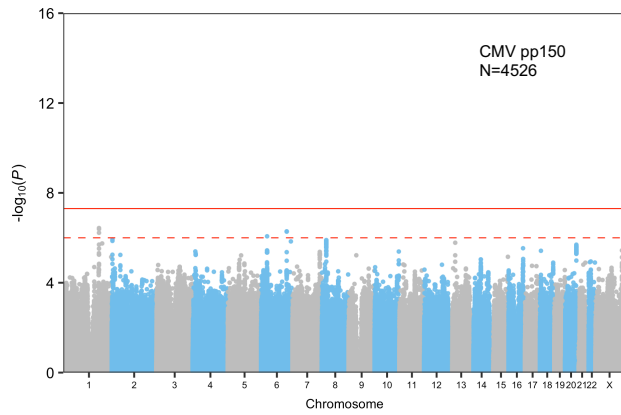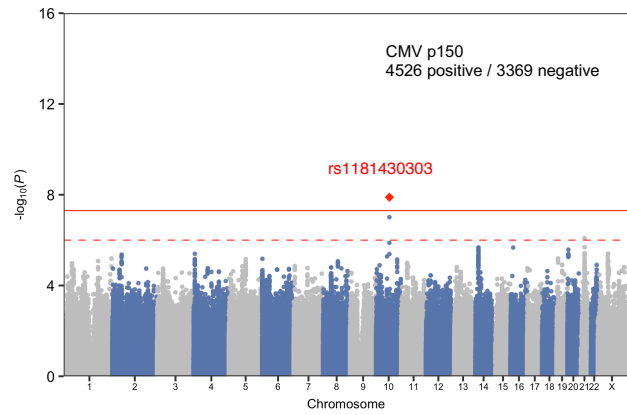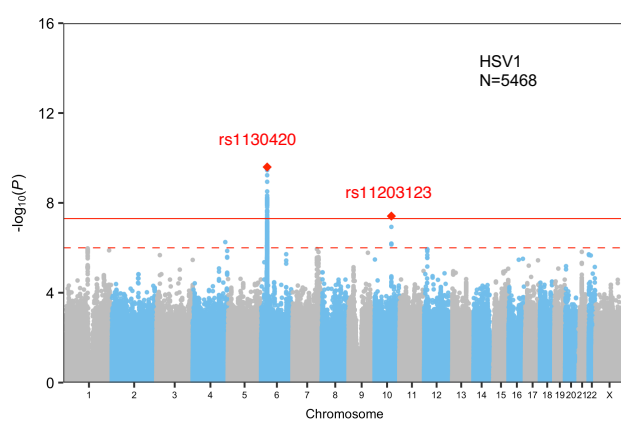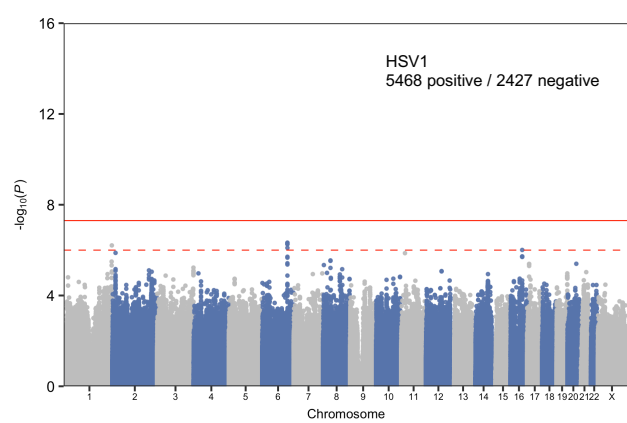

Outcome: Antibody response (MFI z-score) among seropositive

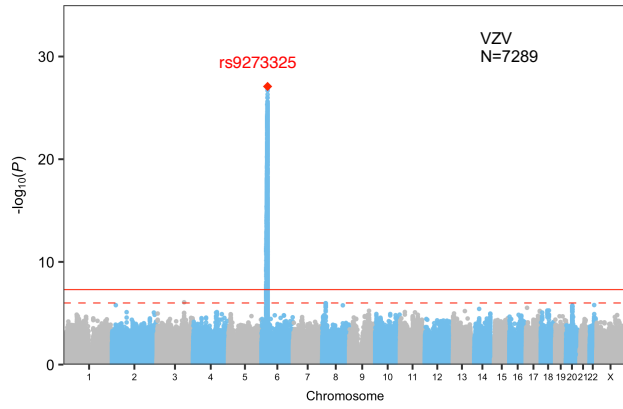

Outcome: Seropositivity status (positive / negative)

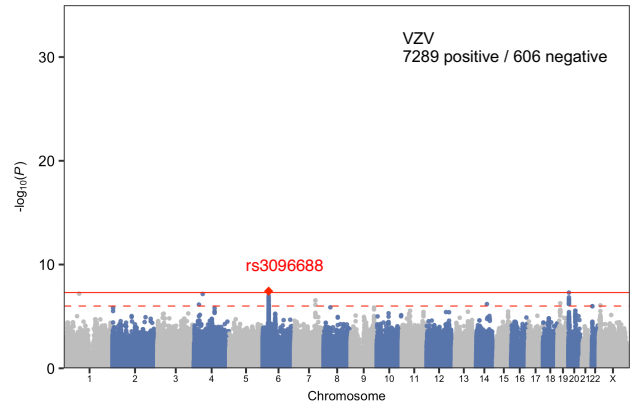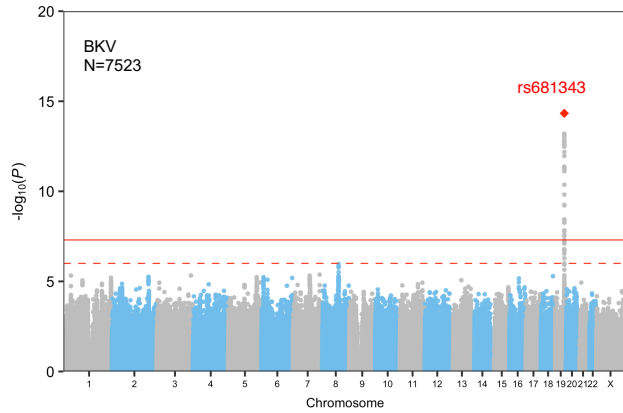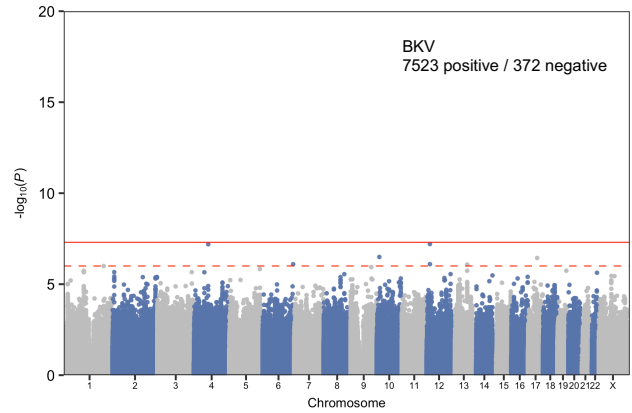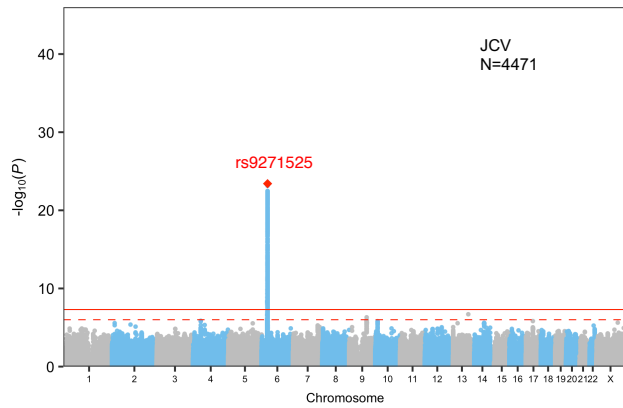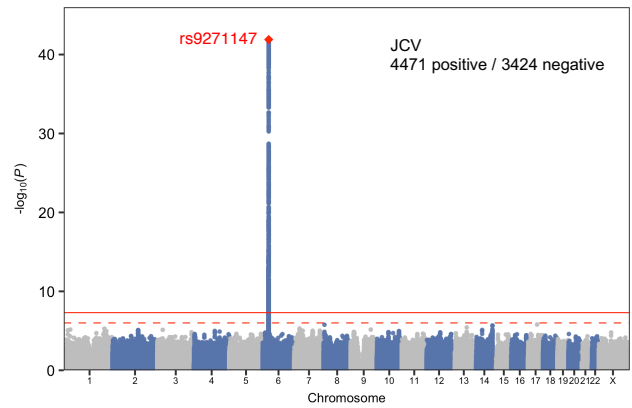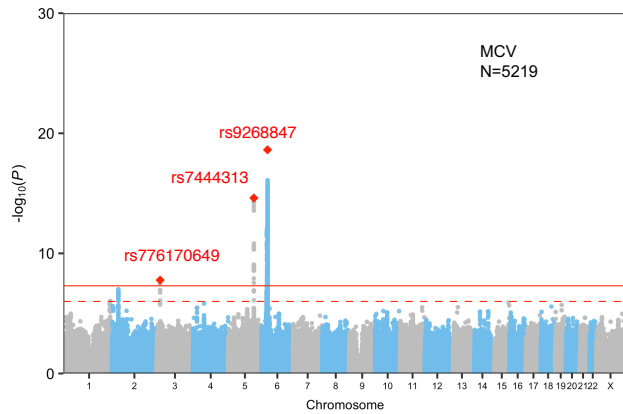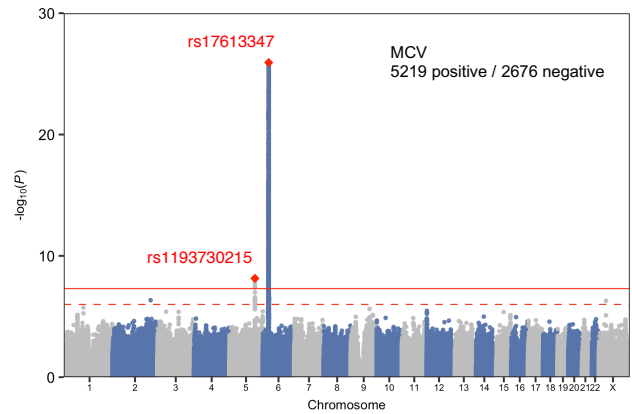

Outcome: Antibody response (MFI z-score) among seropositive

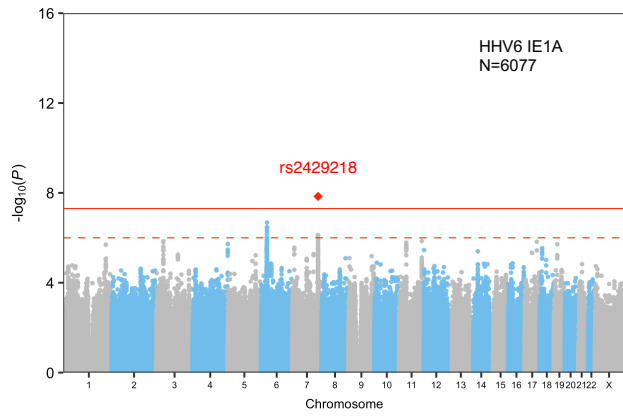

Outcome: Seropositivity status (positive / negative)

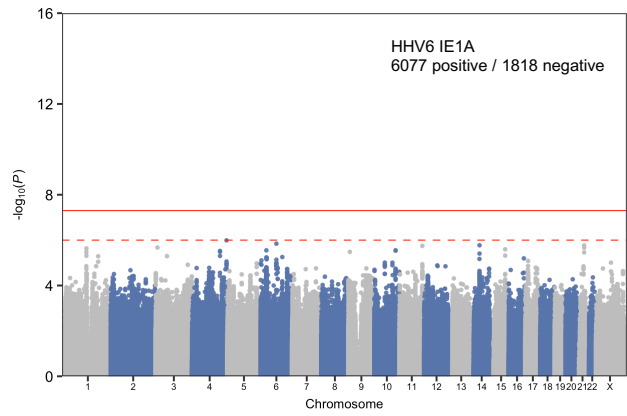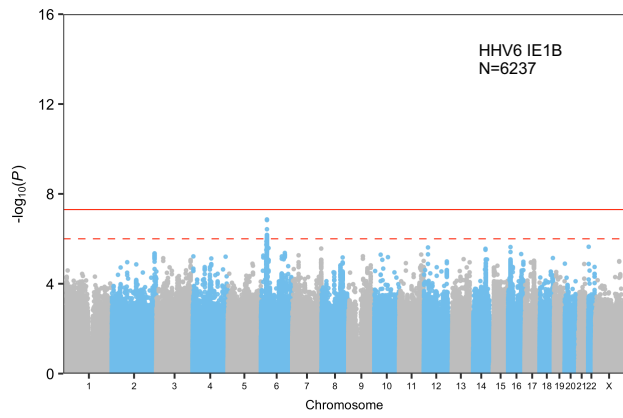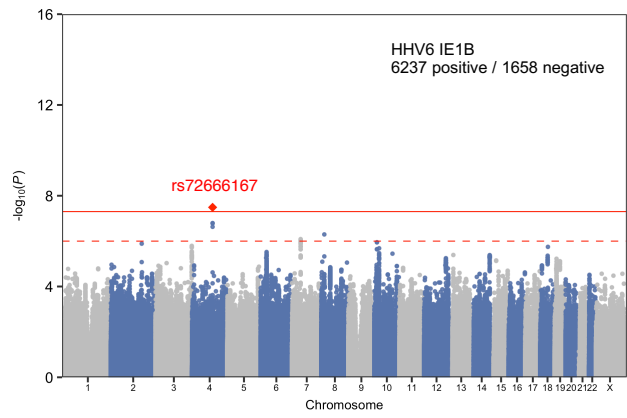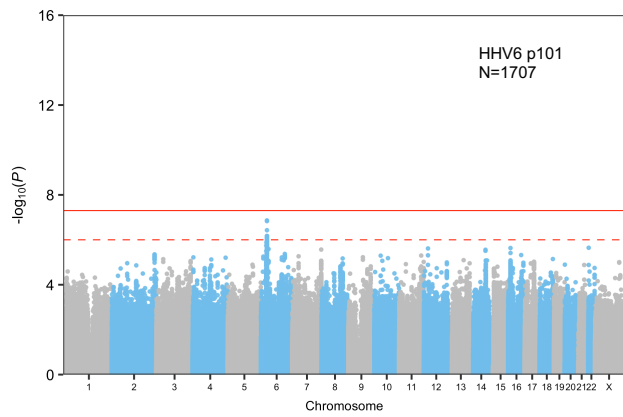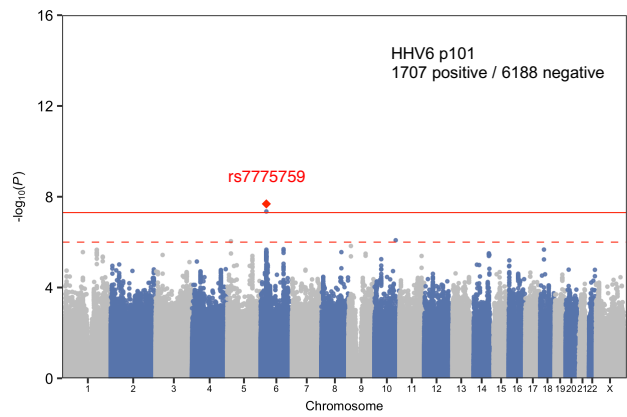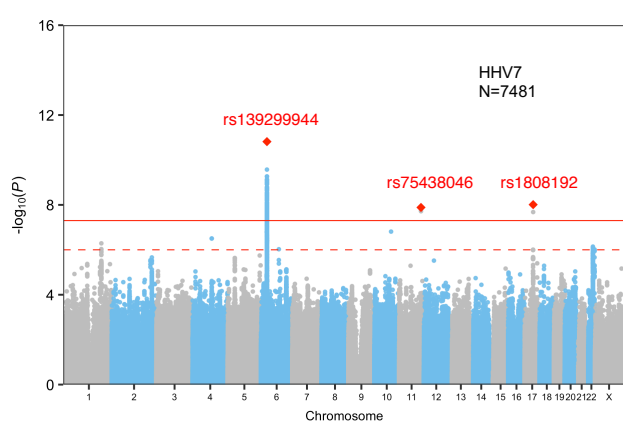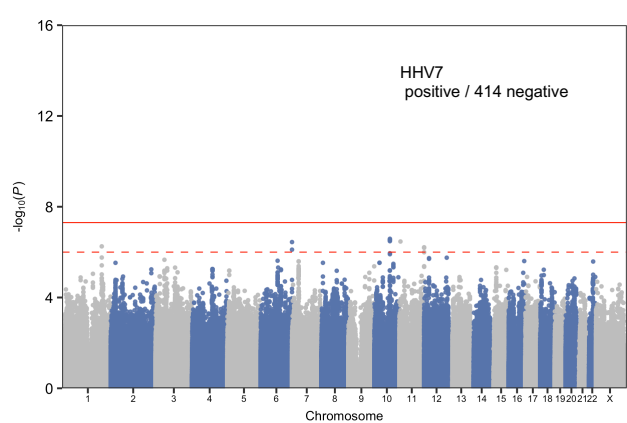

Outcome: Seropositivity status (positive / negative)

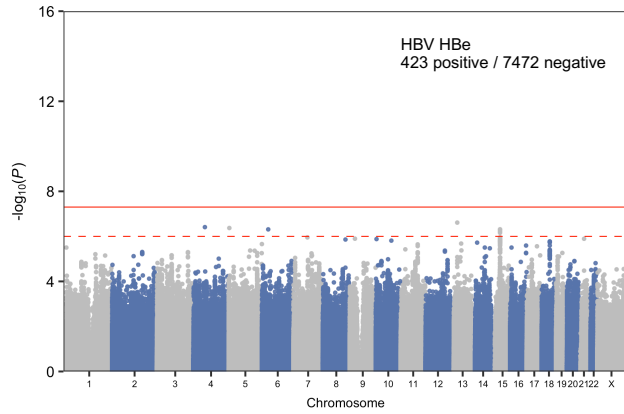

Outcome: Seropositivity status (positive / negative)

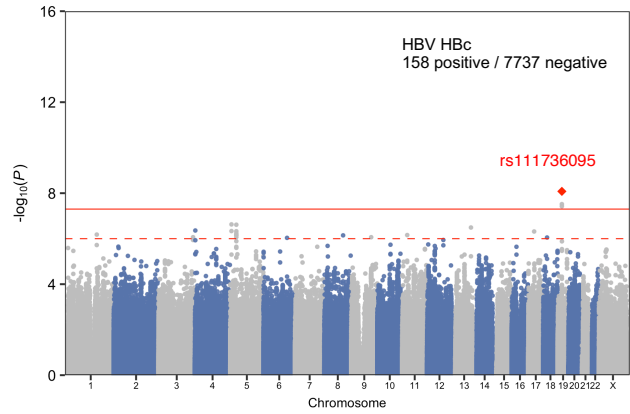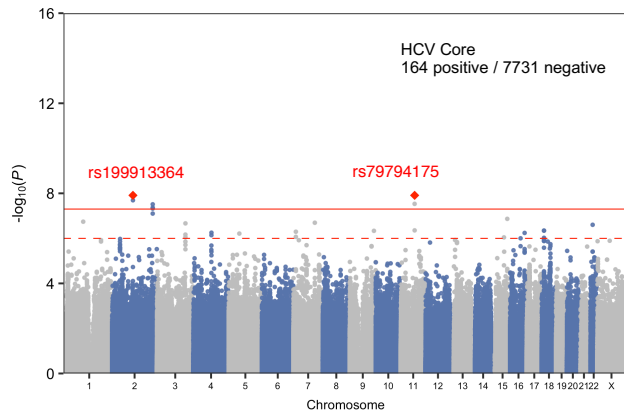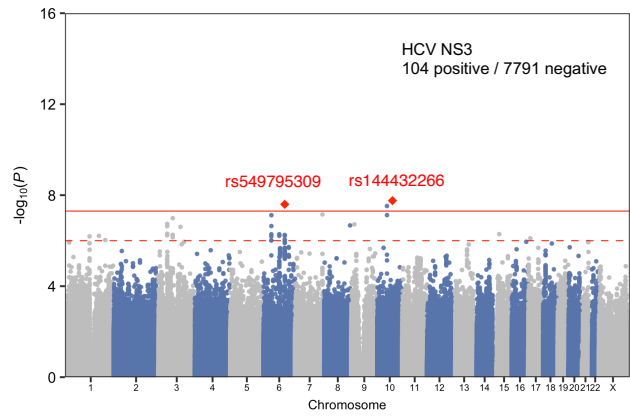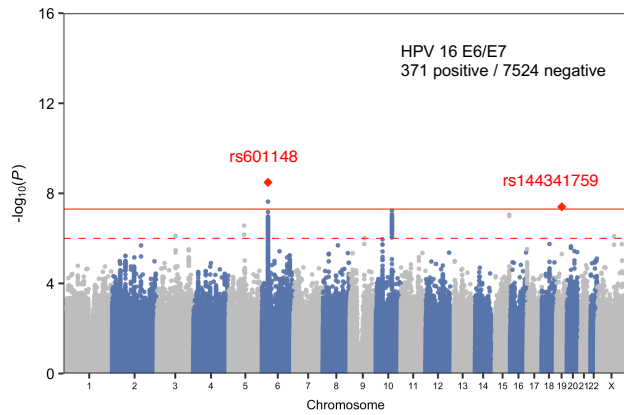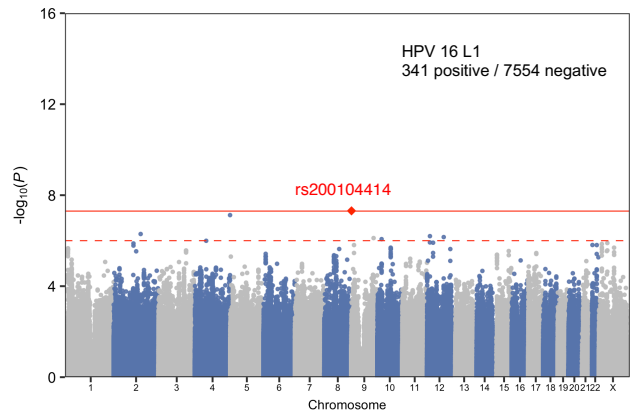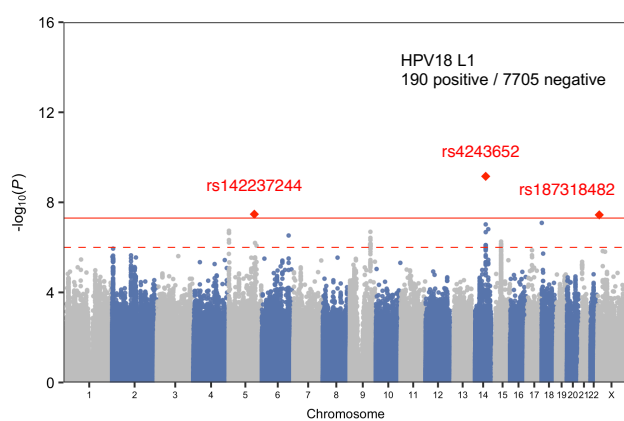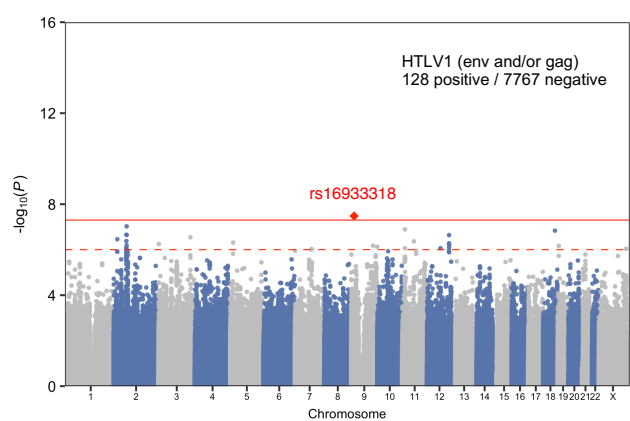



Outcome: Seropositivity status (positive / negative)

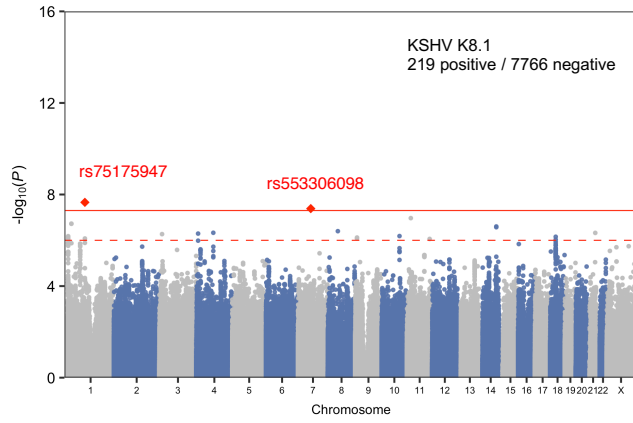

Outcome: Seropositivity status (positive / negative)

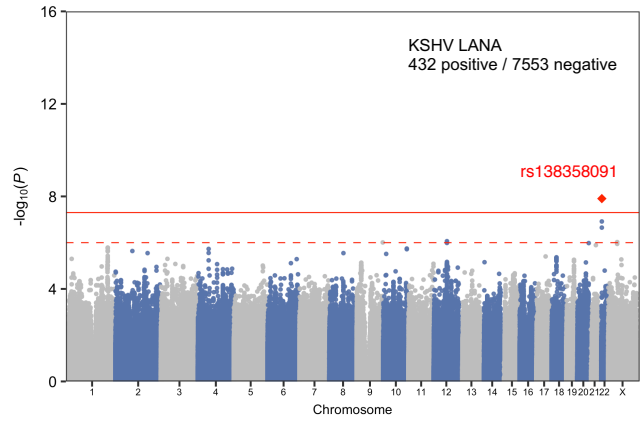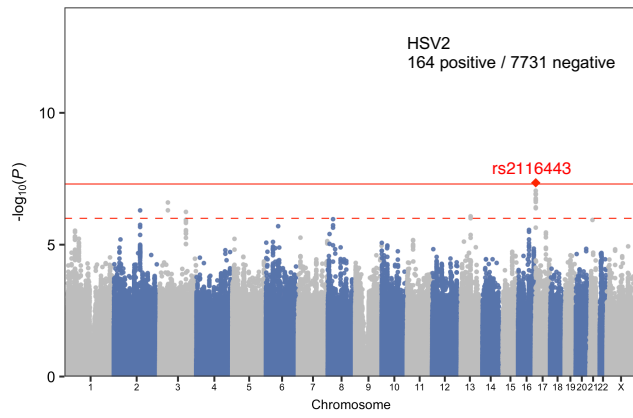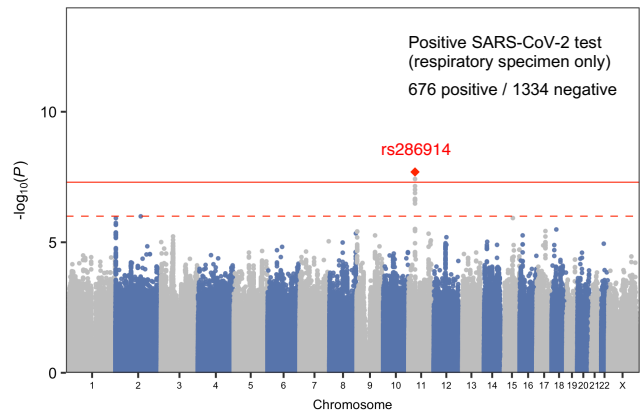

**Supplementary Figure 2:** Linkage disequilibrium (LD) structure between the top-ranking variants in HLA associated with continuous antibody response phenotypes (MFI z-scores) for each antigen

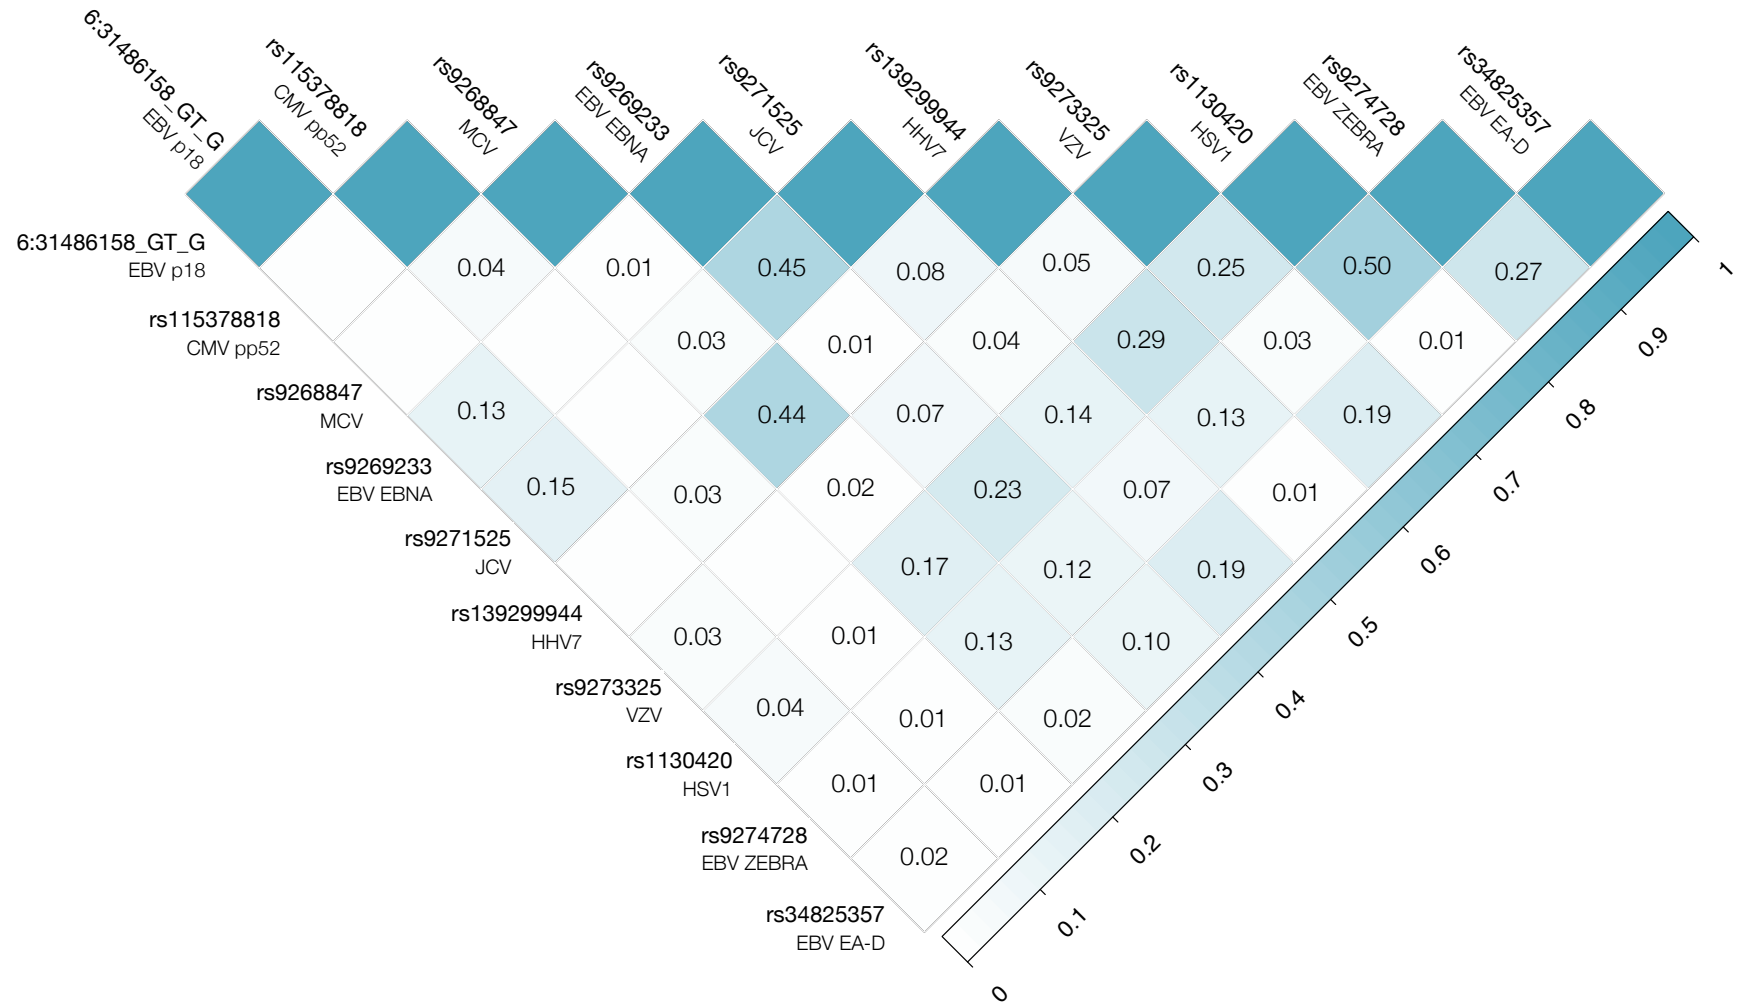

**Supplementary Figure 3:** Summary of expression (eQTL) and splicing quantitative trait loci (sQTL) associations obtained in GTEx v8 and DICE (Database of Immune Cell Expression) for the genome-wide significant variants ( $P < 5.0 \times 10^{-8}$ ) for continuous antibody response phenotypes. In each panel, frequency corresponds to the number of variants with a specific gene-tissue or gene-cell combination.

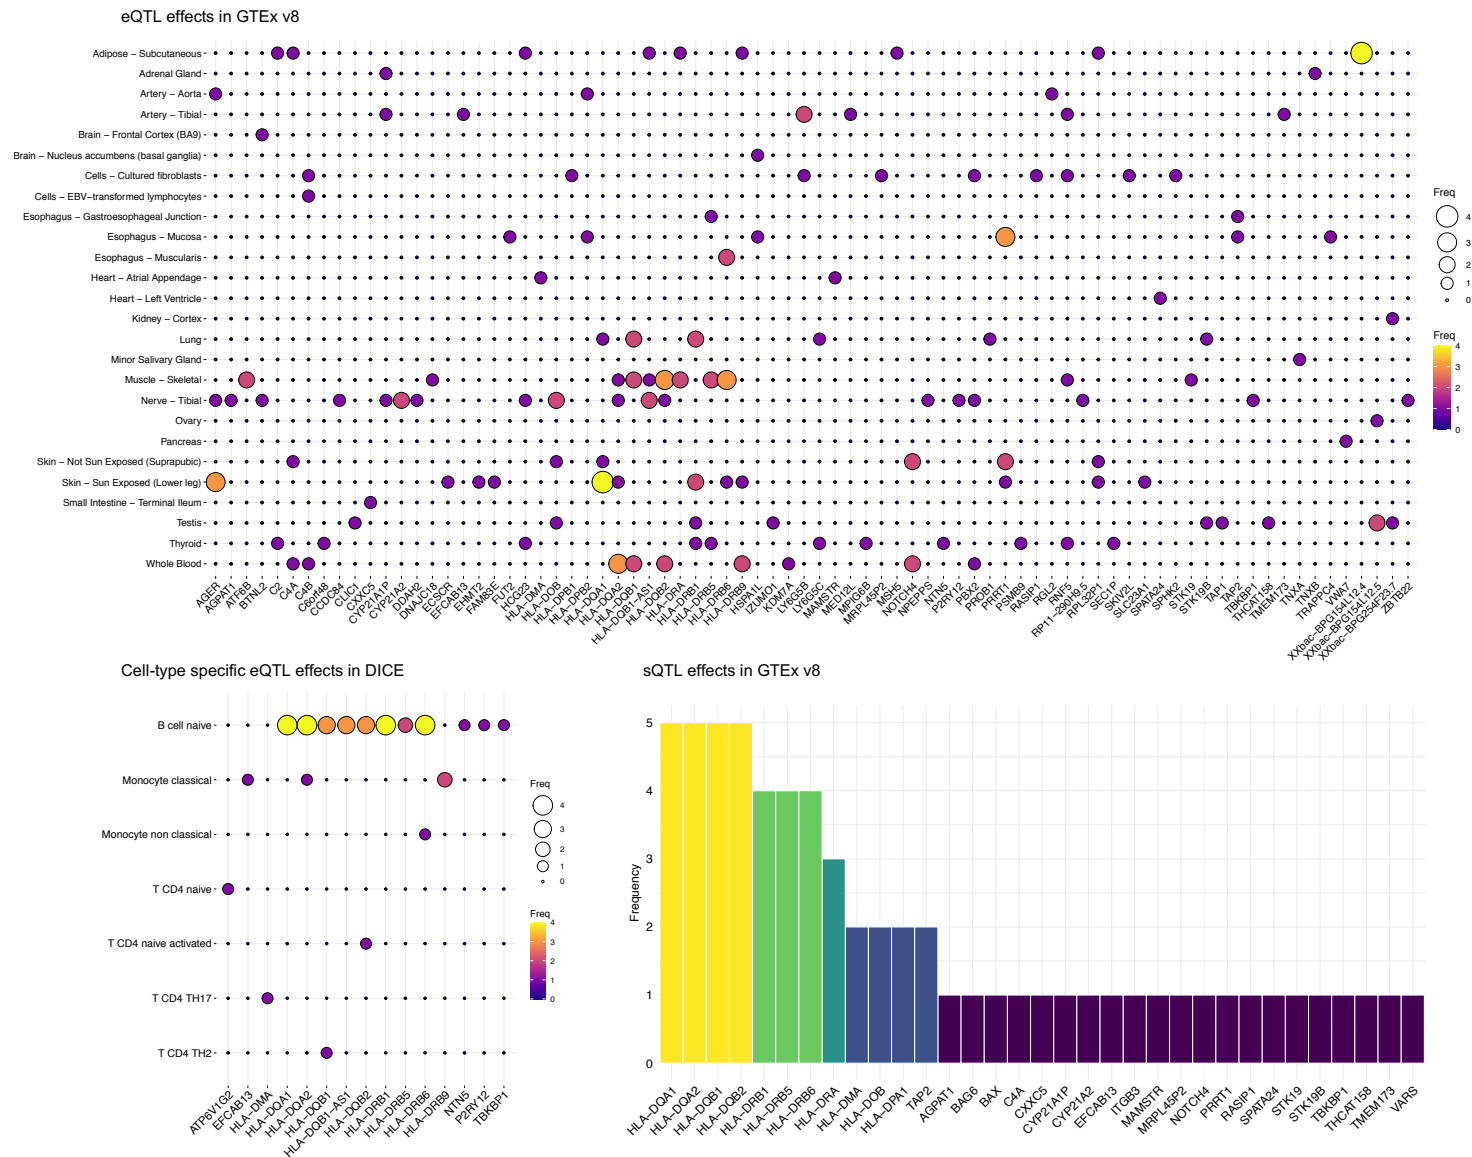

**Supplementary Figure 4:** Regional association plots depicting results based on analyses conditional on statistically independent classical HLA all

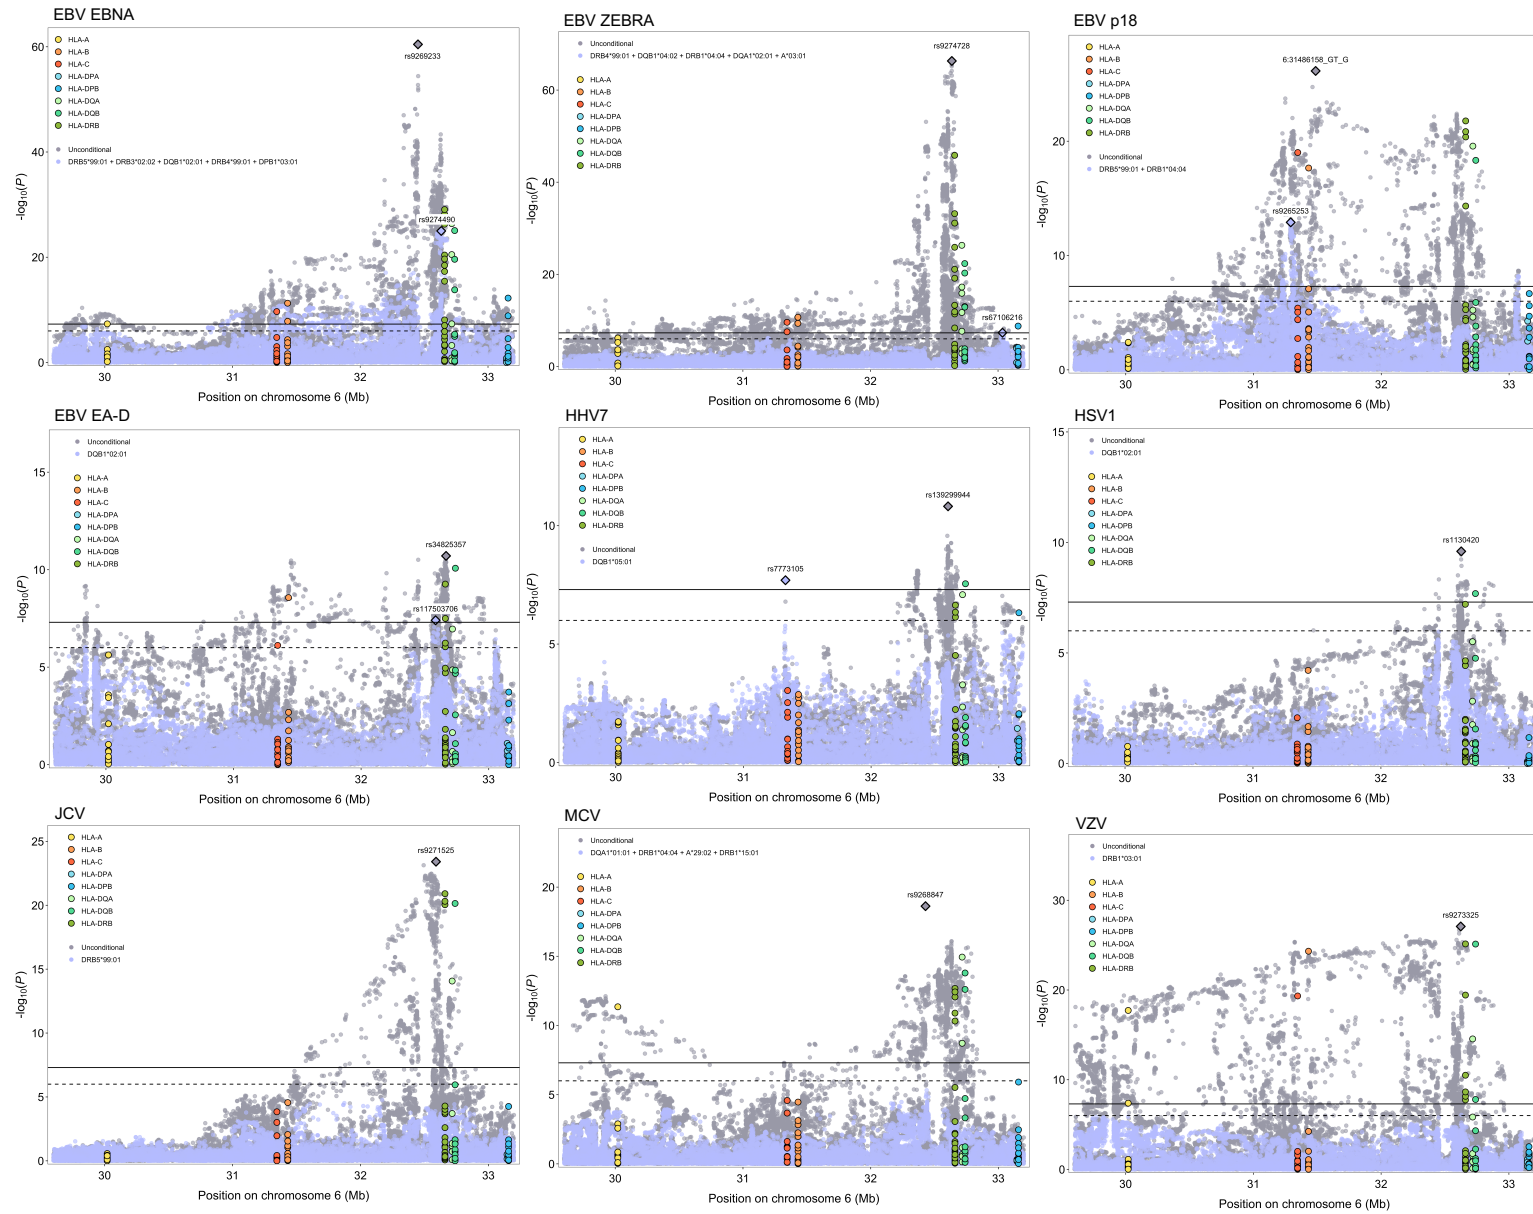

**Supplementary Figure 5: TWAS associations with continuous antigen response phenotypes.** Two Manhattan plots depicting the transcriptome-wide associations for genes with a positive direction of effect (increased expression leads to higher antibody response) and genes with a negative direction of effect (increased expression associated with a decreasing).

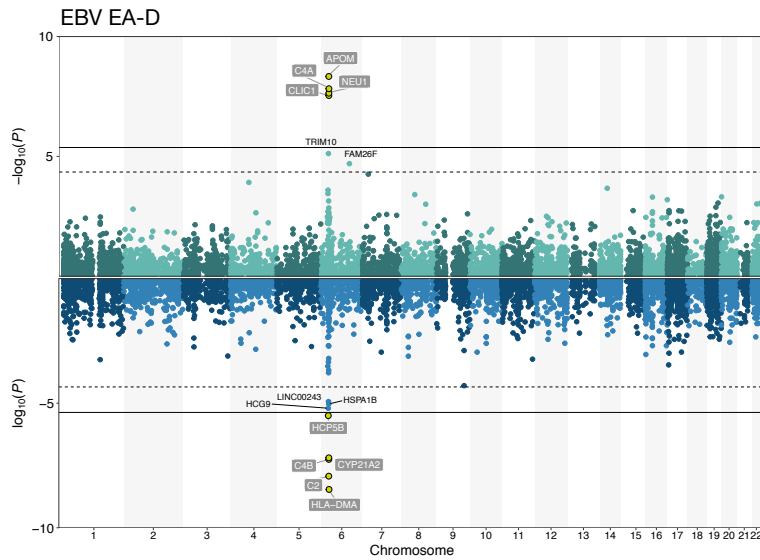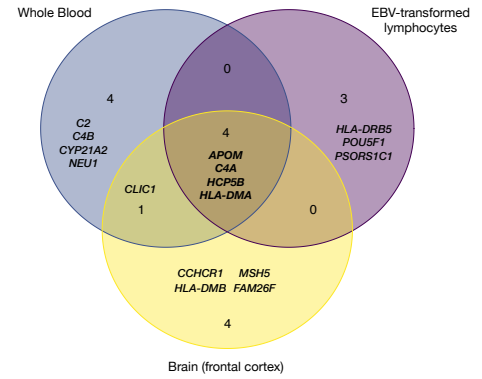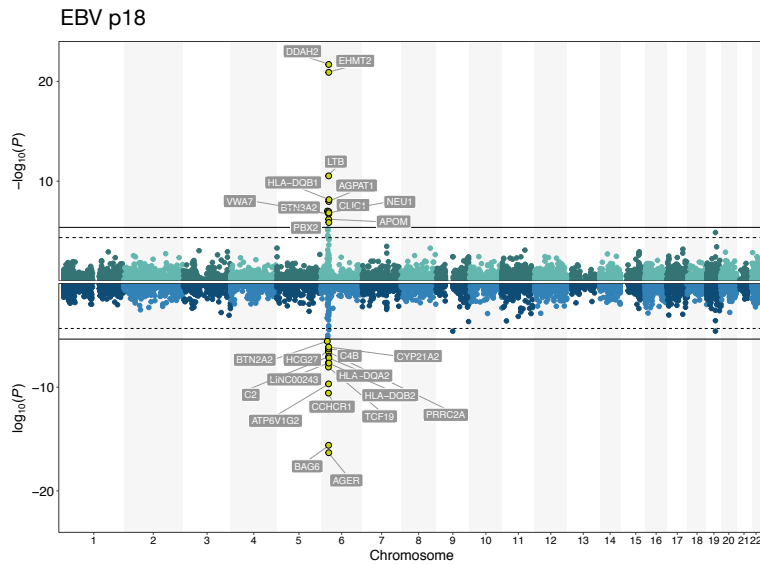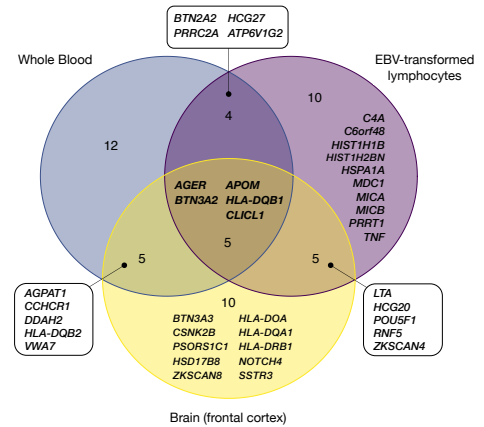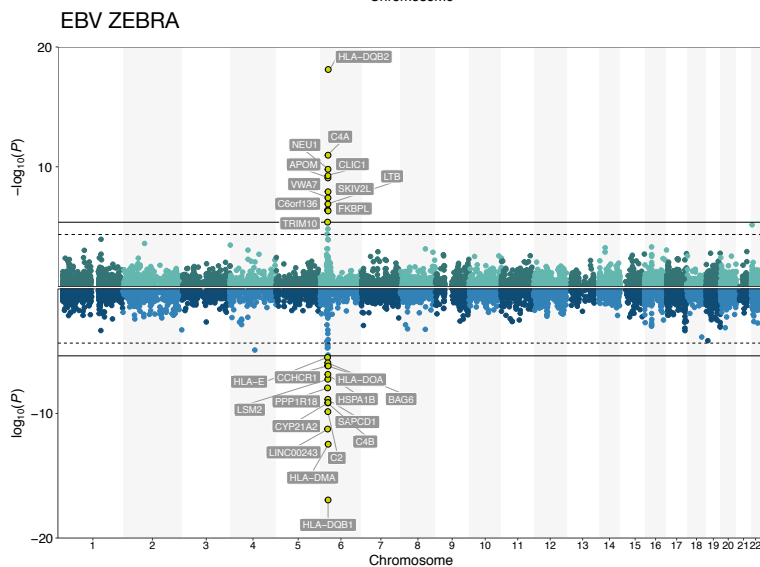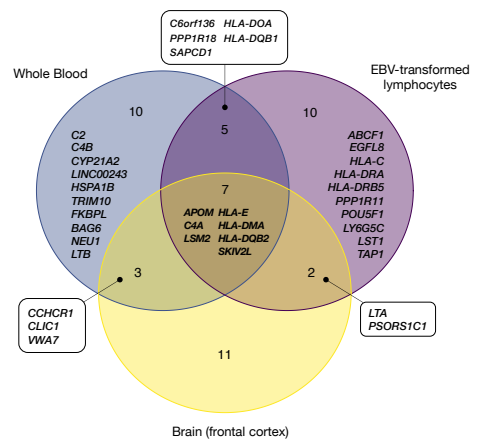

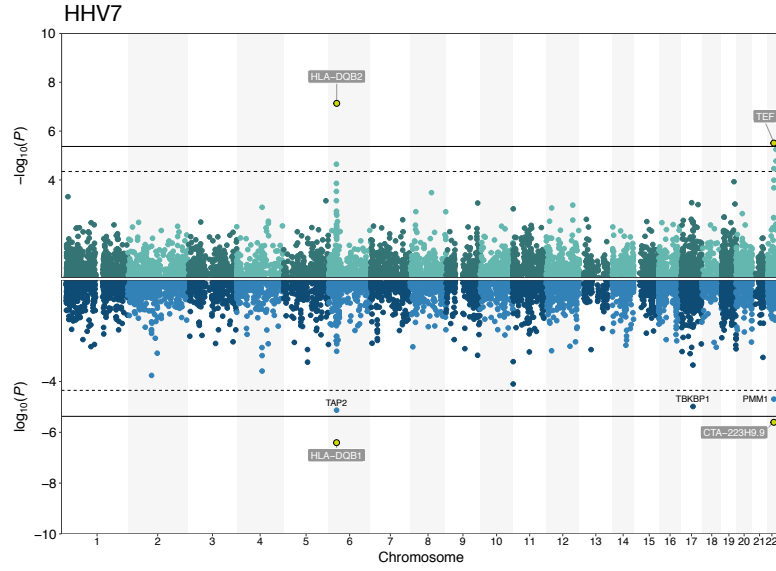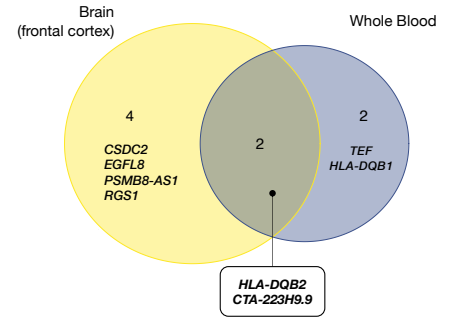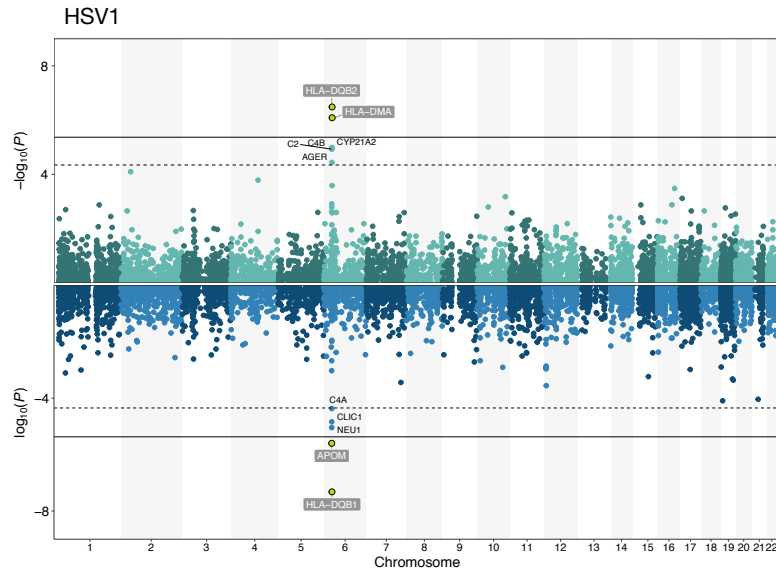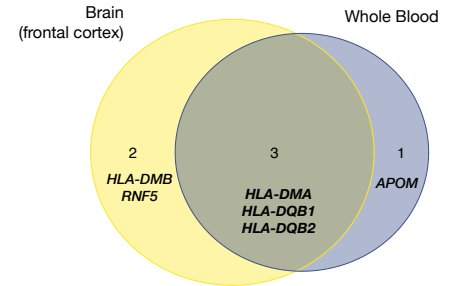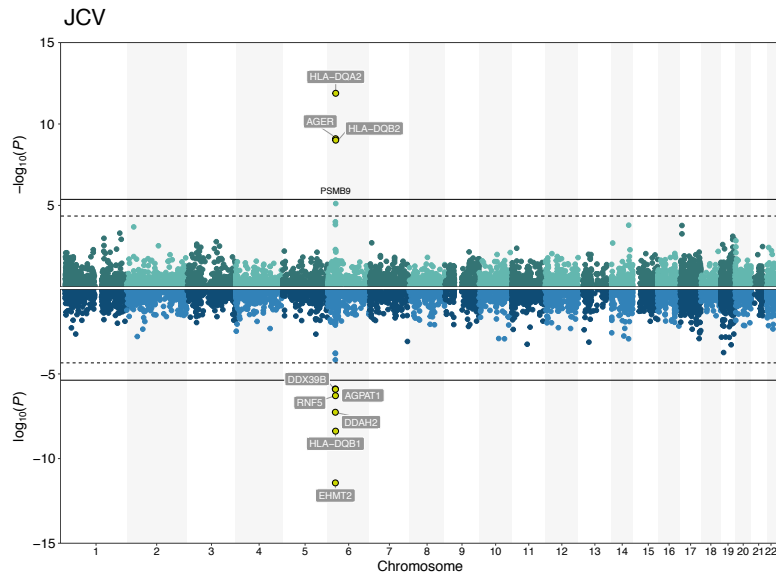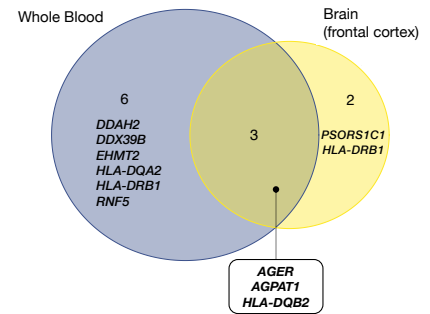

**Supplementary Figure 6:** Variant-specific effects on *ACE2* gene expression and the log odds ratio (OR) for having a positive for SARS-CoV-2 test for significant, independent ( $q_{FDR} < 0.05$ , LD  $r^2 < 0.10$ ) expression quantitative trait loci identified in GTEx v8 (for non-lung tissues) and the Laval eQTL study for lung tissue. Association between *ACE2* expression and SARS-CoV-2 log(OR) was estimated using a linear regression model with a cluster term for tissue type. For variants with effects on gene expression in multiple tissues the eQTL effect size with the lowest p-value was retained.

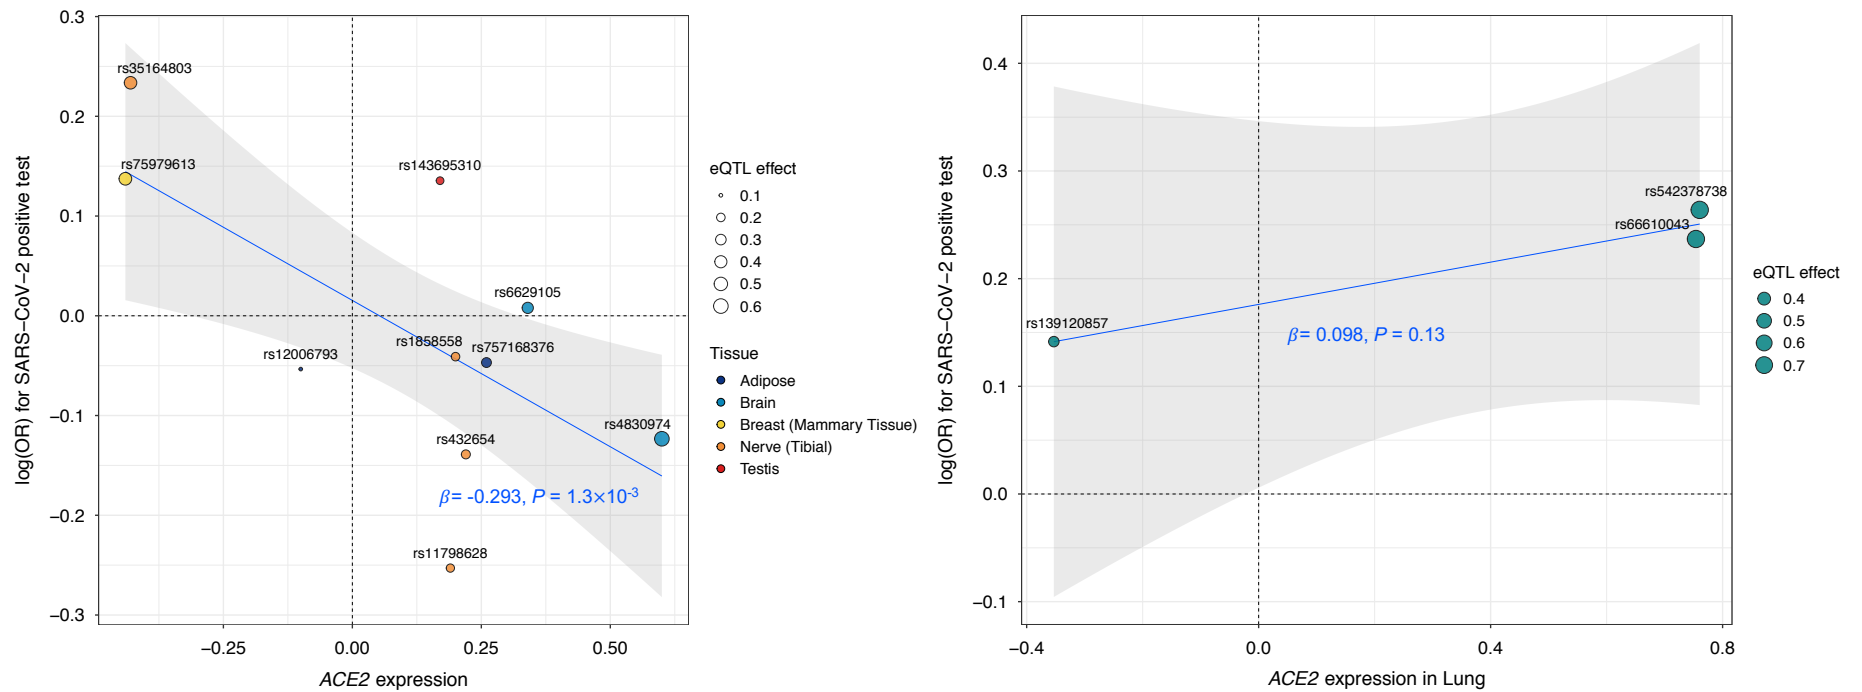

**Supplementary Figure 7:** Visualization of significantly ( $q_{FDR} < 0.05$ ) enriched Reactome pathways for TWAS-identified genes grouped by virus family (human herpes viruses vs. human polyoma viruses) and specificity of association (multiple antigens vs. single antigen). Gene ratio corresponds to the size of the overlap between the input gene list with a specific gene set to the size of the overlap between the input gene list with all the members of the collection of gene sets.

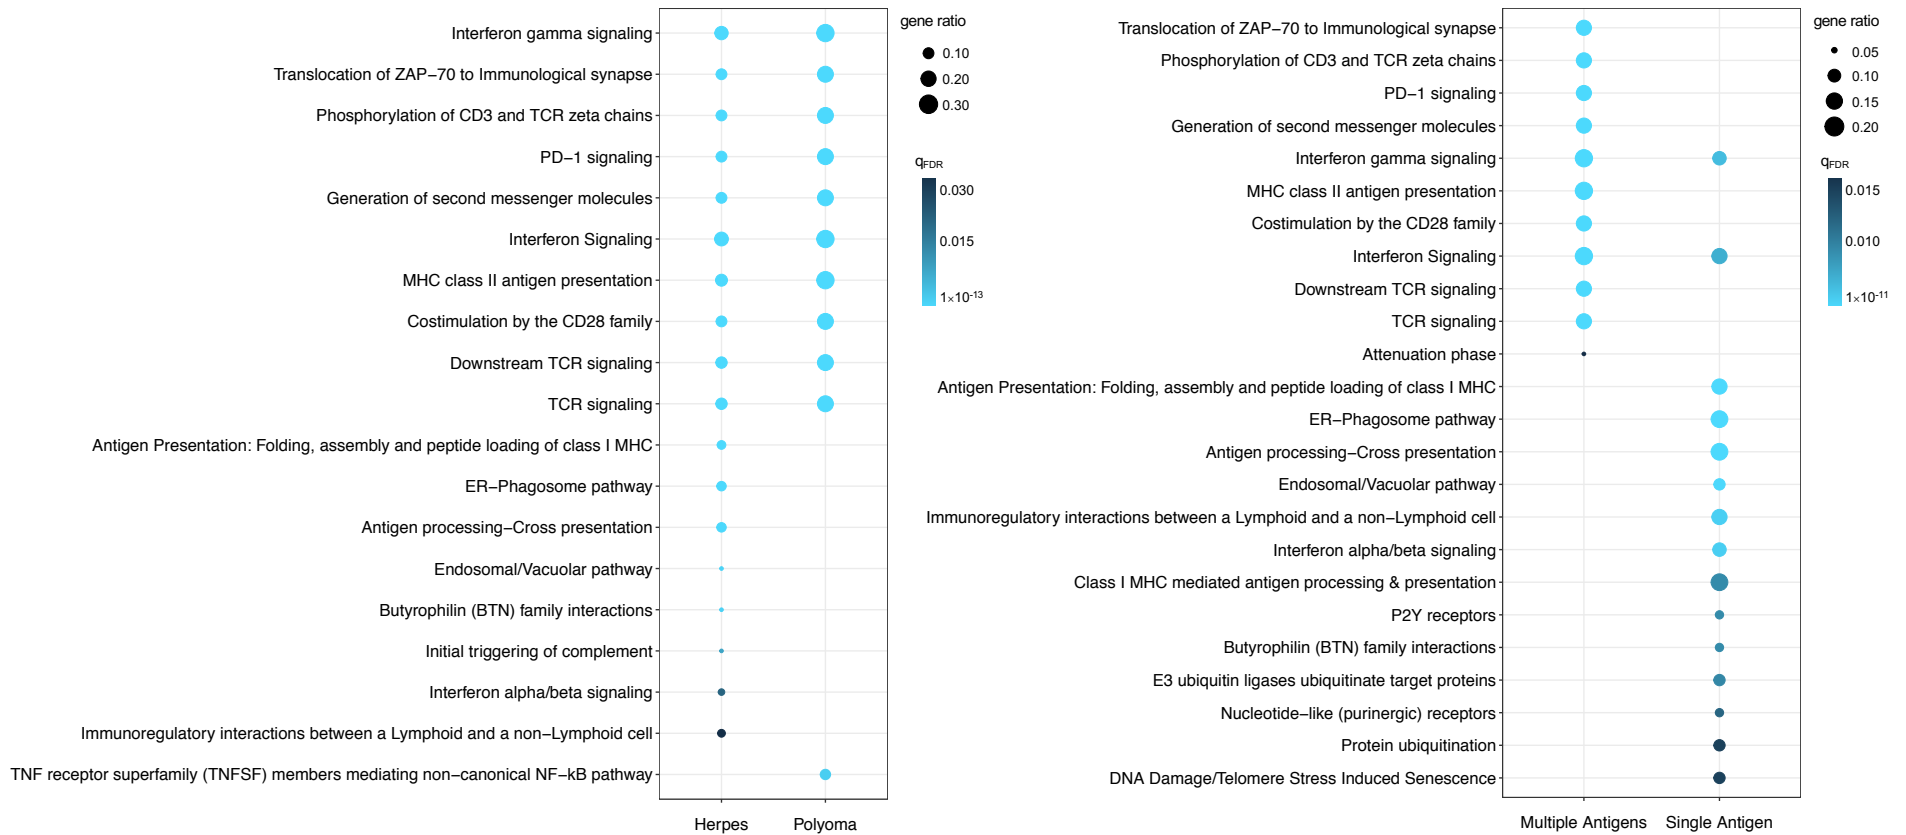



**Supplementary Figure 8:** Significant protein interactions identified in the STRING database for genes associated with multiple antigens. The color of each node corresponds to the lowest  $-\log_{10}(P_{TWAS})$  observed across phenotypes and tissues. This analysis considered unidirectional functional interactions with confidence scores  $\geq 400$  (medium confidence) at the  $q_{FDR} < 0.05$  threshold. Interactions were limited to the input genes.

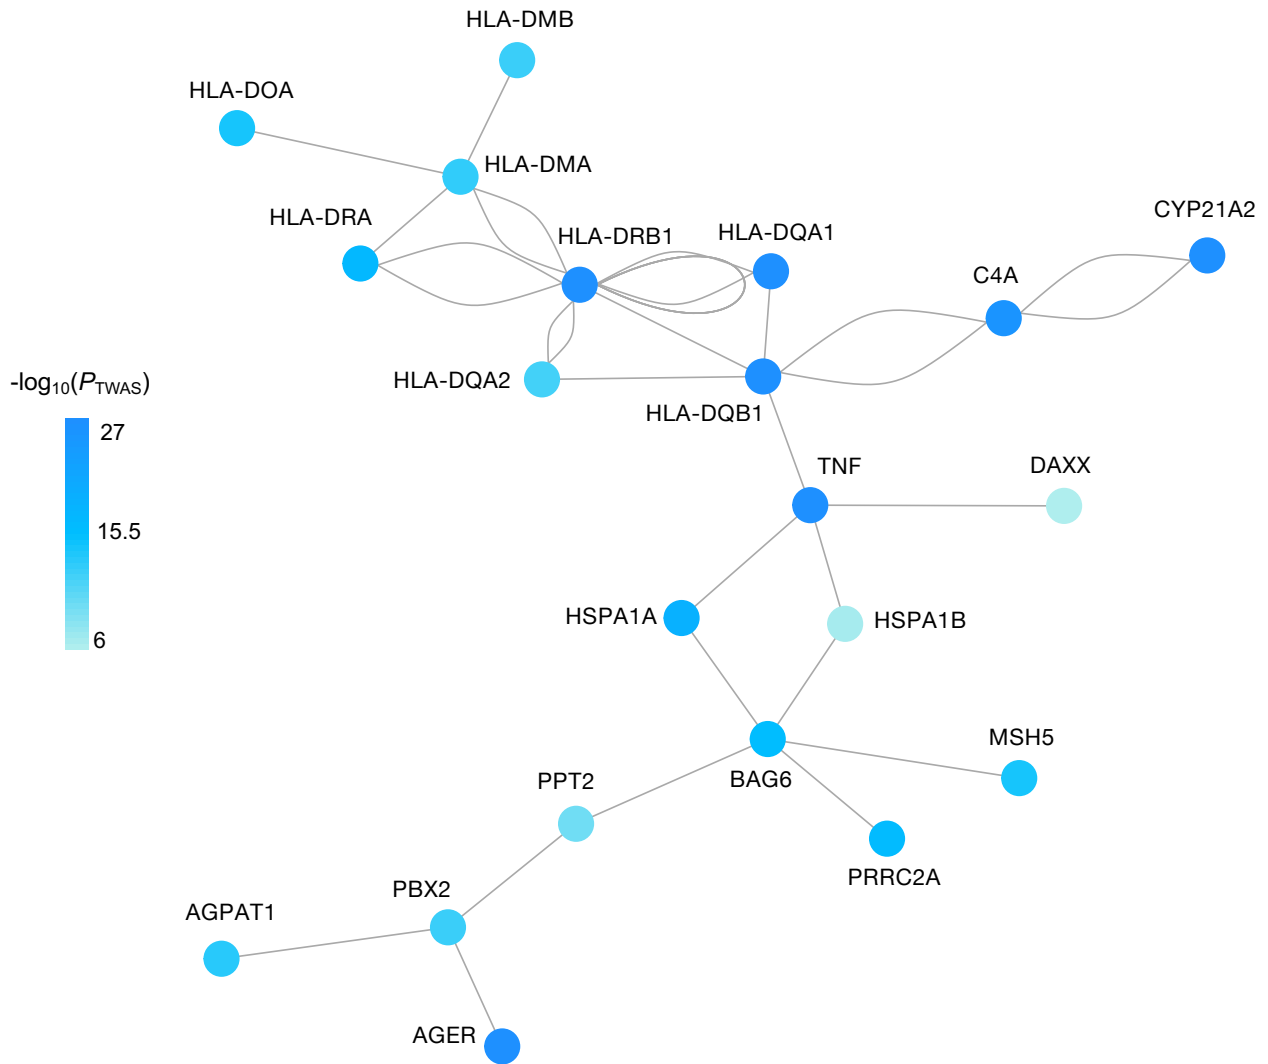

Supplement: 83608-2020.05.01.20088054-1.pdf [file 83608-2020.05.01.20088054-1.pdf]
